# Supplementary material for: Partial Pulpotomy in Young Permanent Teeth: A Systematic Review and Meta-Analysis
Source: MDPI journal article supplement (doi:10.3390/children10091447), 2023-08-24
Supplement: s1 [file s1]

**Table S5.** Papers discarded after full text evaluation.

| Author Names                                                               | Title                                                                                                                                                                                                                | Year | Journal                                          | Reason of exclusion                      |
|----------------------------------------------------------------------------|----------------------------------------------------------------------------------------------------------------------------------------------------------------------------------------------------------------------|------|--------------------------------------------------|------------------------------------------|
| Abiraamasri B.L.; Deepa D.G.                                               | Comparison of ferric sulphate and calcium hydroxide as a pulpotomy agent                                                                                                                                             | 2018 | Research Journal of Pharmacy and Technology      | Not specifically about partial pulpotomy |
| Abuelniel G.M.; Duggal M.S.; Duggal S.; Kabel N.R.                         | Evaluation of Mineral Trioxide Aggregate and Biodentine as pulpotomy agents in immature first permanent molars with carious pulp exposure: A randomised clinical trial                                               | 2021 | European Journal of Paediatric Dentistry         | Not specifically about partial pulpotomy |
| Ahmed M.I.; El Hilaly Mohamed Eid G.; Youssef H.A.                         | Clinical and Radiographic Assessments of Potassium Nitrate in Polycarboxylate Versus Mineral Trioxide Aggregate as Pulpotomy Biomaterials in Immature Mandibular First Permanent Molars: A Randomized Clinical Trial | 2021 | Journal of Endodontics                           | Not specifically about partial pulpotomy |
| Al-Abdullah A., Edris S., Abu Hasna A., De Carvalho L.S., Al-Nahlawi T.    | The Effect of Aloe vera and Chlorhexidine as Disinfectants on the Success of Selective Caries Removal Technique: A Randomized Controlled Trial                                                                       | 2022 | International Journal of Dentistry               | Not specifically about partial pulpotomy |
| Alawwad M., Altinawi M., Rekab M.S., Kosyрева T., Almokaddam H., Katbeh I. | A comparative clinical radiological study using platelet Rich Fibrin and MTA in pulpotomy of first permanent immature molars                                                                                         | 2020 | Journal of Clinical and Diagnostic Research      | Not specifically about partial pulpotomy |
| Alinejad D., Amrollahi N.                                                  | Report a case of beauty regeneration in a child with premature tooth decay                                                                                                                                           | 2019 | Journal of Babol University of Medical Sciences  | Primary theeth                           |
| Aljandan B.; Alhassan H.; Saghah A.; Rasheed M.; Ali A.A.                  | The effectiveness of using different pulp-capping agents on the healing response of the pulp                                                                                                                         | 2012 | Indian Journal of Dental Research                | Not specifically about partial pulpotomy |
| Alqaderi H.E., Al-Mutawa S.A., Qudeimat M.A.                               | MTA pulpotomy as an alternative to root canal treatment in children's permanent teeth in a dental public health setting                                                                                              | 2014 | Journal of dentistry                             | Not specifically about partial pulpotomy |
| Al-Saudi K.W.; Nabih S.M.; Farghaly A.M.; AboHager E.A.-A.                 | Pulpal repair after direct pulp capping with new bioceramic materials: A comparative histological study                                                                                                              | 2019 | Saudi Dental Journal                             | Not specifically about partial pulpotomy |
| Alsofi L.; Khalil W.; Binmadi N.O.; Al-Habib M.A.; Alharbi H.              | Pulpal and periapical tissue response after direct pulp capping with endosequence root repair material and low-level laser application                                                                               | 2022 | BMC Oral Health                                  | Not specifically about partial pulpotomy |
| Asgary S, Hassanizadeh R, Torabzadeh H, Eghbal MJ.                         | Treatment Outcomes of 4 Vital Pulp Therapies in Mature Molars                                                                                                                                                        | 2018 | J Endod                                          | Not specifically about partial pulpotomy |
| Asgary S.                                                                  | Micro-computed Tomography Assessment of Full Pulpotomy in a Mature Molar after Five Years: A Case Report                                                                                                             | 2022 | Iranian Endodontic Journal                       | Not specifically about partial pulpotomy |
| Asgary S.; Ahmadyar M.                                                     | Can miniature pulpotomy procedure improve treatment outcomes of direct pulp capping?                                                                                                                                 | 2012 | Medical Hypotheses                               | Not specifically about partial pulpotomy |
| Ashwin Kumar S.P., Haripriya S., Dharman S.                                | Association of age, gender and teeth distribution in patients undergoing treatment for management of open apex                                                                                                       | 2020 | International Journal of Pharmaceutical Research | Not specifically about partial pulpotomy |
| Azimi S.; Fazlyab M.; Sadri D.; Saghiri M.A.; Khosravanifard B.; Asgary S. | Comparison of pulp response to mineral trioxide aggregate and a bioceramic paste in partial pulpotomy of sound human premolars: A randomized controlled trial                                                        | 2014 | International Endodontic Journal                 | Intentional partial pulpotomy            |

|                                                                                                                                                      |                                                                                                                                                                                                                     |      |                                                            |                                          |
|------------------------------------------------------------------------------------------------------------------------------------------------------|---------------------------------------------------------------------------------------------------------------------------------------------------------------------------------------------------------------------|------|------------------------------------------------------------|------------------------------------------|
| Bagheri M.; Khimani H.; Pishbin L.; Shahabinejad H.                                                                                                  | Effect of pulpotomy procedures with mineral trioxide aggregate and dexamethasone on post-endodontic pain in patients with irreversible pulpitis: A randomized clinical trial                                        | 2019 | European Endodontic Journal                                | Not specifically about partial pulpotomy |
| Bakhtiar H.; Aminishakib P.; Ellini M.R.; Mosavi F.; Abedi F.; Esmailian S.; Esnaashari E.; Nekoofar M.H.; Sezavar M.; Mesgarzadeh V.; About I.      | Dental Pulp Response to RetroMTA after Partial Pulpotomy in Permanent Human Teeth                                                                                                                                   | 2018 | Journal of Endodontics                                     | Not specifically about partial pulpotomy |
| Ballal N.V., Duncan H.F., Rai N., Jalan P., Zehnder M.                                                                                               | Sodium hypochlorite reduces postoperative discomfort and painful early failure after carious exposure and direct pulp capping—initial findings of a randomized controlled trial                                     | 2020 | Journal of Clinical Medicine                               | Not specifically about partial pulpotomy |
| Baraka M., Tekeya M., Bakry N.S., Fontana M.                                                                                                         | Twelve-month randomized controlled trial of 38% silver diamine fluoride with or without potassium iodide in indirect pulp capping of young permanent molars                                                         | 2022 | Journal of the American Dental Association (1939)          | Not specifically about partial pulpotomy |
| Bargkgei I.H.; Halboub E.S.; Alboni R.S.                                                                                                             | Pulpotomy of symptomatic permanent teeth with carious exposure using mineral trioxide aggregate                                                                                                                     | 2013 | Iranian Endodontic Journal                                 | Not specifically about partial pulpotomy |
| Bjørndal L, Fransson H, Bruun G, Markvart M, Kjældgaard M, Näsman P, Hedenbjörk-Lager A, Dige I, Thordrup M.                                         | Randomized Clinical Trials on Deep Carious Lesions: 5-Year Follow-up                                                                                                                                                | 2017 | J Dent Res                                                 | Not specifically about partial pulpotomy |
| Blagojević D.; Petrović B.; Marković D.; Vujkov S.; Rihter I.D.                                                                                      | Pulp vitality preservation after traumatic dental injuries to permanent teeth                                                                                                                                       | 2013 | Medicinski pregled                                         | Not specifically about partial pulpotomy |
| Brizuela C., Ormeño A., Cabrera C., Cabezas R., Silva C.I., Ramírez V., Mercade M.                                                                   | Direct Pulp Capping with Calcium Hydroxide, Mineral Trioxide Aggregate, and Biodentine in Permanent Young Teeth with Caries: A Randomized Clinical Trial                                                            | 2017 | Journal of endodontics                                     | Not specifically about partial pulpotomy |
| Brodén J, Davidson T, Fransson H.                                                                                                                    | Cost-effectiveness of pulp capping and root canal treatment of young permanent teeth                                                                                                                                | 2019 | Acta Odontol Scand                                         | Not specifically about partial pulpotomy |
| Cengiz E.; Yilmaz H.G.                                                                                                                               | Efficacy of erbium, chromium-doped:yttrium, scandium, gallium, and garnet laser irradiation combined with resin-based tricalcium silicate and calcium hydroxide on direct pulp capping: A randomized clinical trial | 2016 | Journal of Endodontics                                     | Not specifically about partial pulpotomy |
| Cunha N.N.D.O.; Junqueira M.A.; Cosme-Silva L.; Santos L.D.S.T.; De Oliveira G.A.V.; Neto R.T.M.; Nogueira D.A.; Brigagão M.R.P.L.; Moretti A.B.D.S. | Expression of matrix metalloproteinases-8 and myeloperoxidase in pulp tissue after pulpotomy with calcium silicate cements                                                                                          | 2021 | Pesquisa Brasileira em Odontopediatria e Clínica Integrada | Not specifically about partial pulpotomy |
| Daniele L.                                                                                                                                           | Mineral Trioxide Aggregate (MTA) direct pulp capping: 10 years clinical results                                                                                                                                     | 2017 | Giornale Italiano di Endodonzia                            | Not specifically about partial pulpotomy |
| de Almeida Santo Ramos I.F.; Biz M.T.; Paulino N.; Scremin A.; Della Bona A.; Barletta F.B.; de Figueiredo J.A.P.                                    | Histopathological analysis of corticosteroid-antibiotic preparation and propolis paste formulation as intracanal medication after pulpectomy: An in vivo study                                                      | 2012 | Journal of Applied Oral Science                            | Not specifically about partial pulpotomy |
| Durmus N, Tok YT, Kaya S, Akcay M.                                                                                                                   | Effectiveness of the ozone application in two-visit indirect pulp therapy of permanent molars with deep carious lesion: a randomized clinical trial                                                                 | 2019 | Clin Oral Investig                                         | Not specifically about partial pulpotomy |
| Eggmann F, Gasser TJW, Hecker H, Amato M, Weiger R, Zaugg LK.                                                                                        | Partial pulpotomy without age restriction: a retrospective assessment of permanent teeth with carious pulp exposure                                                                                                 | 2022 | Clin Oral Investig                                         | Wrong design                             |
| Galani M, Tewari S, Sangwan P, Mittal S, Kumar V, Duhan J.                                                                                           | Comparative Evaluation of Postoperative Pain and Success Rate after Pulpotomy and Root Canal Treatment in Cariously Exposed Mature Permanent Molars: A Randomized Controlled Trial                                  | 2017 | J Endod                                                    | Not specifically about partial pulpotomy |

|                                                                                                                            |                                                                                                                                                                                                             |      |                                                                                                   |                                          |
|----------------------------------------------------------------------------------------------------------------------------|-------------------------------------------------------------------------------------------------------------------------------------------------------------------------------------------------------------|------|---------------------------------------------------------------------------------------------------|------------------------------------------|
| Ghoddusi J.; Shahrami F.; Alizadeh M.; Kianoush K.; Forghani M.                                                            | Clinical and radiographic evaluation of vital pulp therapy in open apex teeth with MTA and ZOE.                                                                                                             | 2012 | The New York state dental journal                                                                 | Not specifically about partial pulpotomy |
| Guan X., Zhou Y., Yang Q., Zhu T., Chen X., Deng S., Zhang D.                                                              | Vital pulp therapy in permanent teeth with irreversible pulpitis caused by caries: A prospective cohort study                                                                                               | 2021 | Journal of Personalized Medicine                                                                  | Wrong design                             |
| Hashem D, Mannocci F, Patel S, Manoharan A, Brown JE, Watson TF, Banerjee A.                                               | Clinical and radiographic assessment of the efficacy of calcium silicate indirect pulp capping: a randomized controlled clinical trial                                                                      | 2015 | J Dent Res                                                                                        | Not specifically about partial pulpotomy |
| Hashem D., Mannocci F., Patel S., Manoharan A., Watson T.F., Banerjee A.                                                   | Evaluation of the efficacy of calcium silicate vs. glass ionomer cement indirect pulp capping and restoration assessment criteria: a randomised controlled clinical trial- 2-year results                   | 2019 | Clinical oral investigations                                                                      | Not specifically about partial pulpotomy |
| Hernández-Gatón P., Serrano C.R., Nelson Filho P., De Castañeda E.R., Lucisano M.P., Silva R.A., Silva L.A.                | Stepwise Excavation Allows Apexogenesis in Permanent Molars with Deep Carious Lesions and Incomplete Root Formation                                                                                         | 2015 | Caries research                                                                                   | Not specifically about partial pulpotomy |
| Hilton T.J.; Ferracane J.L.; Mancl L.                                                                                      | Comparison of CaOH with MTA for Direct Pulp Capping: A PBRN Randomized Clinical Trial                                                                                                                       | 2013 | Journal of Dental Research                                                                        | Not specifically about partial pulpotomy |
| Huth K.C.; Hajek-Al-Khatir N.; Wolf P.; Ilie N.; Hickel R.; Paschos E.                                                     | Long-term effectiveness of four pulpotomy techniques: 3-year randomised controlled trial                                                                                                                    | 2012 | Clinical Oral Investigations                                                                      | Not specifically about partial pulpotomy |
| Jespersen J.J., Hellstein J., Williamson A., Johnson W.T., Qian F.                                                         | Evaluation of dental pulp sensibility tests in a clinical setting                                                                                                                                           | 2014 | Journal of endodontics                                                                            | Not specifically about partial pulpotomy |
| Kalyan K.S.D.R., Vinay C., Arunbhupathi, Uloopi K.S., Chandrasekhar R., RojaRamya K.S.                                     | Preclinical Evaluation and Clinical Trial of Chlorhexidine Polymer Scaffold for Vital Pulp Therapy                                                                                                          | 2019 | The Journal of clinical pediatric dentistry                                                       | Primary theeth                           |
| Keerthana T., Sindhu R., Deepak S.                                                                                         | Comparative analysis of the success rate of direct and indirect pulp capping procedures-a retrospective analysis                                                                                            | 2020 | International Journal of Research in Pharmaceutical Sciences                                      | Not specifically about partial pulpotomy |
| Koc Vural U, Kiremitci A, Gokalp S.                                                                                        | Randomized Clinical Trial to Evaluate MTA Indirect Pulp Capping in Deep Caries Lesions After 24-Months                                                                                                      | 2017 | Oper Dent                                                                                         | Not specifically about partial pulpotomy |
| Kumar K.; Naz S.; Memon P.; Arshad M.M.; Rajput F.; Shaikh M.A.                                                            | Efficacy of bio-dentine and mineral trioxide aggregate in pulpotomies of cariously exposed vital permanent teeth                                                                                            | 2020 | Rawal Medical Journal                                                                             | Not specifically about partial pulpotomy |
| Li J., Wang E.-H., Wang Y.                                                                                                 | Effectiveness and safety of pulp regeneration and revascularization therapy for pulpal necrosis of the immature permanent tooth: Study protocol for a single-center, randomized, controlled, clinical trial | 2017 | Chinese Journal of Tissue Engineering Research                                                    | Not specifically about partial pulpotomy |
| Liu S.Y., Gong W.Y., Liu M.Q., Long Y.Z., Dong Y.M.                                                                        | Clinical efficacy observation of direct pulp capping using iRoot BP Plus therapy in mature permanent teeth with carious pulp exposure                                                                       | 2020 | Zhonghua kou qiang yi xue za zhi = Zhonghua kouqiang yixue zazhi = Chinese journal of stomatology | Not specifically about partial pulpotomy |
| Mahapatra J., Nikhade P.P., Sukhtankar S.                                                                                  | Comparative evaluation of the efficacy of light cure calcium hydroxide and theracal LC as indirect pulp capping materials in patients with deep carious lesion-An interventional study                      | 2020 | European Journal of Molecular and Clinical Medicine                                               | Not specifically about partial pulpotomy |
| Maltz M, Jardim JJ, Mestrinho HD, Yamaguti PM, Podestá K, Moura MS, de Paula LM.                                           | Partial removal of carious dentine: a multicenter randomized controlled trial and 18-month follow-up results                                                                                                | 2013 | Caries Res                                                                                        | Not specifically about partial pulpotomy |
| Mangione F.; ElZeiden M.; Bardet C.; Lesieur J.; Bonneau M.; Decup F.; Salmon B.; Jacobs R.; Chaussain C.; Opsahl-Vital S. | Implanted Dental Pulp Cells Fail to Induce Regeneration in Partial Pulpotomies                                                                                                                              | 2017 | Journal of Dental Research                                                                        | Not specifically about partial pulpotomy |

|                                                                                                                                                                                                           |                                                                                                                                                                                                             |      |                                                                                                |                                          |
|-----------------------------------------------------------------------------------------------------------------------------------------------------------------------------------------------------------|-------------------------------------------------------------------------------------------------------------------------------------------------------------------------------------------------------------|------|------------------------------------------------------------------------------------------------|------------------------------------------|
| Mathur V.P., Dhillon J.K., Logani A., Kalra G.                                                                                                                                                            | Evaluation of indirect pulp capping using three different materials: A randomized control trial using cone-beam computed tomography                                                                         | 2016 | Indian journal of dental research : official publication of Indian Society for Dental Research | Not specifically about partial pulpotomy |
| Moura-Netto C, Kerber Tedesco T, Werner S, Volpi Mello-Moura AC, Prócida Raggio D.                                                                                                                        | Influence of preoperative pain in the success rate of indirect pulp capping: a retrospective study                                                                                                          | 2017 | Minerva Stomatol                                                                               | Not specifically about partial pulpotomy |
| Mutluay M, Arıkan V, Sarı S, Kısa Ü.                                                                                                                                                                      | Does Achievement of Hemostasis After Pulp Exposure Provide an Accurate Assessment of Pulp Inflammation?                                                                                                     | 2018 | Pediatr Dent                                                                                   | Primary theeth                           |
| Noor A., Afzal J., Mahmood A., Ullah M.S., Munawar M., Mehdi M.M.                                                                                                                                         | Effectiveness of Calcium Hydroxide (CaOH) as agent for Direct Pulp Capping in the Mandibular Molars                                                                                                         | 2021 | Pakistan Journal of Medical and Health Sciences                                                | Not specifically about partial pulpotomy |
| Nosrat A, Seifi A, Asgary S.                                                                                                                                                                              | Pulpotomy in caries-exposed immature permanent molars using calcium-enriched mixture cement or mineral trioxide aggregate: a randomized clinical trial                                                      | 2013 | Int J Paediatr Dent                                                                            | Not specifically about partial pulpotomy |
| Odabaş M.E.; Alaçam A.; Sillelioğlu H.; Deveci C.                                                                                                                                                         | Clinical and radiographic success rates of mineral trioxide aggregate and ferric sulphate pulpotomies performed by dental students                                                                          | 2012 | European Journal of Paediatric Dentistry                                                       | Not specifically about partial pulpotomy |
| Oz F.D., Bolay S., Bayazit E.O., Bicer C.O., Isikhan S.Y.                                                                                                                                                 | Long-term survival of different deep dentin caries treatments: A 5-year clinical study                                                                                                                      | 2019 | Nigerian journal of clinical practice                                                          | Not specifically about partial pulpotomy |
| Parinyaprom N, Nirunsittirat A, Chuveera P, Na Lampang S, Srisuwan T, Sastraruji T, Bua-On P, Simprasert S, Khoipanich I, Sutharaphan T, Theppimarn S, Ue-Srichai N, Tangtrakooljaroen W, Chompu-Inwai P. | Outcomes of Direct Pulp Capping by Using Either ProRoot Mineral Trioxide Aggregate or Biodentine in Permanent Teeth with Carious Pulp Exposure in 6- to 18-Year-Old Patients: A Randomized Controlled Trial | 2018 | J Endod                                                                                        | Not specifically about partial pulpotomy |
| Pratima B, Chandan GD, Nidhi T, Nitish I, Sankriti M, Nagaveni S, Shweta S.                                                                                                                               | Postoperative assessment of diode laser zinc oxide eugenol and mineral trioxide aggregate pulpotomy procedures in children: A comparative clinical study                                                    | 2018 | J Indian Soc Pedod Prev Dent                                                                   | Primary theeth                           |
| Rahman B.; Goswami M.                                                                                                                                                                                     | Comparative Evaluation of Indirect Pulp Therapy in Young Permanent Teeth using Biodentine and TheraCal: A Randomized Clinical Trial                                                                         | 2021 | Journal of Clinical Pediatric Dentistry                                                        | Not specifically about partial pulpotomy |
| Reetu S.; Shrestha D.; Kayastha R.                                                                                                                                                                        | Post-operative pain and associated factors in patients undergoing single visit root canal treatment on teeth with vital pulp                                                                                | 2018 | Kathmandu University Medical Journal                                                           | Not specifically about partial pulpotomy |
| Schwendicke F., Stolpe M.                                                                                                                                                                                 | Direct pulp capping after a carious exposure versus root canal treatment: a cost-effectiveness analysis                                                                                                     | 2014 | Journal of endodontics                                                                         | Not specifically about partial pulpotomy |
| Sharma A.; Thomas M.; Shetty N.; Srikant N.                                                                                                                                                               | Evaluation of indirect pulp capping using pozzolan-based cement (ENDOCER-Zr®) and mineral trioxide aggregate - A randomized controlled trial                                                                | 2020 | Journal of Conservative Dentistry                                                              | Not specifically about partial pulpotomy |
| Singh S., Mittal S., Tewari S.                                                                                                                                                                            | Effect of Different Liners on Pulpal Outcome after Partial Caries Removal: A Preliminary 12 Months Randomised Controlled Trial                                                                              | 2019 | Caries research                                                                                | Not specifically about partial pulpotomy |
| Taha N.A.; Abdelkader S.Z.                                                                                                                                                                                | Outcome of full pulpotomy using Biodentine in adult patients with symptoms indicative of irreversible pulpitis                                                                                              | 2018 | International Endodontic Journal                                                               | Not specifically about partial pulpotomy |
| Taha N.A.; Al-Rawash M.H.; Imran Z.A.                                                                                                                                                                     | Outcome of full pulpotomy in mature permanent molars using 3 calcium silicate-based materials: A parallel, double blind, randomized controlled trial                                                        | 2022 | International Endodontic Journal                                                               | Not specifically about partial pulpotomy |
| Taha N.A.; Khazali M.A.                                                                                                                                                                                   | Partial Pulpotomy in Mature Permanent Teeth with Clinical Signs Indicative of Irreversible Pulpitis: A Randomized Clinical Trial                                                                            | 2017 | Journal of Endodontics                                                                         | Not specifically about partial pulpotomy |
| Torabzadeh H, Asgary S.                                                                                                                                                                                   | Indirect pulp therapy in a symptomatic mature molar using calcium enriched mixture cement                                                                                                                   | 2013 | J Conserv Dent                                                                                 | Not specifically about partial pulpotomy |

|                                                                             |                                                                                                                                                                                |      |                                                                                                         |                                          |
|-----------------------------------------------------------------------------|--------------------------------------------------------------------------------------------------------------------------------------------------------------------------------|------|---------------------------------------------------------------------------------------------------------|------------------------------------------|
| Trairatvorakul C,<br>Koothiratrakarn A.                                     | Calcium hydroxide partial pulpotomy is an alternative to formocresol pulpotomy based on a 3-year randomized trial                                                              | 2012 | Int J Paediatr Dent                                                                                     | Primary theeth                           |
| Tsujino K.; Shintani S.                                                     | Intentional partial pulpotomy to talon cusp for tooth crown morphology correction in orthodontic treatment                                                                     | 2021 | Pediatric Dental Journal                                                                                | Intentional partial pulpotomy            |
| Tüzüner T., Alacam A.,<br>Altunbas D.A., Gokdogan F.G., Gundogdu E.         | Clinical and radiographic outcomes of direct pulp capping therapy in primary molar teeth following haemostasis with various antiseptics: a randomised controlled trial.        | 2012 | European journal of paediatric dentistry : official journal of European Academy of Paediatric Dentistry | Not specifically about partial pulpotomy |
| Vignesh S., Nasim I.,<br>Rajasekar A.                                       | A retrospective analysis of the correlation between the type of pulp exposure and the choice of pulp capping agents                                                            | 2020 | International Journal of Research in Pharmaceutical Sciences                                            | Not specifically about partial pulpotomy |
| Wang J.                                                                     | Treatment of decayed primary teeth with vital and non-vital pulp conditions                                                                                                    | 2019 | Zhonghua kou qiang yi xue za zhi = Zhonghua kouqiang yixue zazhi = Chinese journal of stomatology       | Not specifically about partial pulpotomy |
| Yazdanfar I, Barekatin M,<br>Zare Jahromi M.                                | Combination effects of diode laser and resin-modified tricalcium silicate on direct pulp capping treatment of caries exposures in permanent teeth: a randomized clinical trial | 2020 | Lasers Med Sci                                                                                          | Not specifically about partial pulpotomy |
| Kang C.-M., Sun Y., Song J.S.,<br>Pang N.-S., Roh B.-D., Lee C.-Y., Shin Y. | A randomized controlled trial of various MTA materials for partial pulpotomy in permanent teeth                                                                                | 2017 | Journal of dentistry                                                                                    | Wrong population                         |
