# Supplementary material for: Partial Pulpotomy in Young Permanent Teeth: A Systematic Review and Meta-Analysis
Source: MDPI journal article supplement (doi:10.3390/children10091447), 2023-08-24
Supplement: s1 [file s1]

**Table S3.** Extraction form.

| Author                            |  |
|-----------------------------------|--|
| Sources                           |  |
| Location                          |  |
| Foundig sources                   |  |
| Type of study                     |  |
| Age                               |  |
| Patients (n)                      |  |
| Teeth (n)                         |  |
| Drop-out of teeth                 |  |
| Study design                      |  |
| Final restoration                 |  |
| Follow-up                         |  |
| Outcomes                          |  |
| Overall Succes rate test group    |  |
| Overall Succes rate control group |  |
| Conclusion                        |  |
