# Supplementary material for: Partial Pulpotomy in Young Permanent Teeth: A Systematic Review and Meta-Analysis
Source: MDPI journal article supplement (doi:10.3390/children10091447), 2023-08-24
Supplement: s1 [file s1]

**Table S4.** Papers discarded after title and abstract evaluation.

| Author Names                                                                                    | Title                                                                                                                                                                                     | Year | Journal                                                           |
|-------------------------------------------------------------------------------------------------|-------------------------------------------------------------------------------------------------------------------------------------------------------------------------------------------|------|-------------------------------------------------------------------|
| Reddy S.; Prakash V.; Subbiya A.; Mitthra S.                                                    | 100 years of calcium hydroxide in dentistry: A review of literature                                                                                                                       | 2020 | Indian Journal of Forensic Medicine and Toxicology                |
| Höhne C, Schmitter M.                                                                           | 3D Printed Teeth for the Preclinical Education of Dental Students                                                                                                                         | 2019 | J Dent Educ                                                       |
| Hong S.; Park Y.-H.; Lee J.; Moon J.; Kong E.; Jeon J.; Park J.-C.; Kim H.-R.; Kim P.           | 3d visualization of dynamic cellular reaction of pulpal cd11c+ dendritic cells against pulpitis in whole murine tooth                                                                     | 2021 | International Journal of Molecular Sciences                       |
| Chen W.; Guan Y.; Xu F.; Jiang B.                                                               | 4-Methylumbelliferone promotes the migration and odontogenic differentiation of human dental pulp stem cells exposed to lipopolysaccharide in vitro                                       | 2021 | Cell Biology International                                        |
| Chen Y.-P., Hsieh C.-Y., Hsu W.-T., Wu F.-Y., Shih W.-Y.                                        | A 10-year trend of dental treatments under general anesthesia of children in Taipei Veterans General Hospital                                                                             | 2017 | Journal of the Chinese Medical Association                        |
| Cleary J, Al-Hadidi R, Scully A, Yahn W, Zaid Z, Boynton JR, Eckert GJ, Yanca E, Fontana M.     | A 12-Month Randomized Clinical Trial of 38% SDF vs. Restorative Treatment                                                                                                                 | 2022 | JDR Clin Trans Res                                                |
| Chen K.; Lei Q.; Xiong H.; Chen Y.; Luo W.; Liang Y.                                            | A 2-year clinical evaluation of stainless steel crowns and composite resin restorations in primary molars under general anaesthesia in China's Guangdong province                         | 2018 | British Dental Journal                                            |
| Gu Y, Xie X, Zhuang R, Weir MD, Oates TW, Bai Y, Zhao L, Xu HHK.                                | A Biphasic Calcium Phosphate Cement Enhances Dentin Regeneration by Dental Pulp Stem Cells and Promotes Macrophages M2 Phenotype In Vitro                                                 | 2021 | Tissue Eng Part A                                                 |
| Escobar PM, Kishen A, Lopes FC, Borges CC, Kogler EG, Sousa-Neto MD.                            | A CAD/CAM-based strategy for concurrent endodontic and restorative treatment                                                                                                              | 2019 | Restor Dent Endod                                                 |
| Kunisada Y., Yoshioka N., Ibaragi S., Okui T., Nagatsuka H., Sasaki A.                          | A case of intramandibular neurofibroma resembling a radicular cyst in a neurofibromatosis type 1 patient                                                                                  | 2021 | International Journal of Surgery Case Reports                     |
| Arigbede A.O.; Adesuwa A.A.                                                                     | A case of quackery and obsession for diastema resulting in avoidable endodontic therapy                                                                                                   | 2012 | African Health Sciences                                           |
| Torabinejad M.; Faras H.                                                                        | A clinical and histological report of a tooth with an open apex treated with regenerative endodontics using platelet-rich plasma                                                          | 2012 | Journal of Endodontics                                            |
| Munoz-Sanchez M.-L., Linas N., Decerle N., Nicolas E., Hennequin M., Cousson P.-Y.              | A combination of full pulpotomy and chairside cad/cam endocrown to treat teeth with deep carious lesions and pulpitis in a single session: A preliminary study                            | 2020 | International Journal of Environmental Research and Public Health |
| Alsaikhan L.S.; Algarni R.A.; Alzahrani M.A.; Gufran K.; Alqahtani A.M.; Altammami M.; Mansy I. | A comparative analysis of periapical status by using cone beam computed tomography and periapical radiography                                                                             | 2022 | European Review for Medical and Pharmacological Sciences          |
| Winnier J.; Suresh R.                                                                           | A comparative evaluation of a labial approach with a conventional palatal approach for endodontic access in primary maxillary incisors: A pilot study                                     | 2020 | International Journal of Clinical Pediatric Dentistry             |
| Selvi M.M.; Selvabalaji A.; Chonat A.; Ananthan V.; Mani E.; Chinnaswamy A.D.                   | A comparative evaluation of antimicrobial efficacy of triphala and calcium hydroxide as intracanal medicament: An in Vitro study                                                          | 2022 | Journal of Pharmacy and Bioallied Sciences                        |
| Kathal S.; Gupta S.; Bhayya D.P.; Rao A.; Roy A.P.; Sabhlok A.                                  | A comparative evaluation of clinical and radiographic success rate of pulpotomy in primary molars using antioxidant mix and mineral trioxide aggregate: An in vivo 1-year follow-up study | 2017 | Journal of Indian Society of Pedodontics and Preventive Dentistry |
| Karthik E.V.G.; Pradeep S.; Ganapathy D.                                                        | A comparative evaluation of efficacy of apex locators vs radiovisiograph in determining the working length of single rooted teeth-an in-vitro study                                       | 2021 | International Journal of Dentistry and Oral Science               |
| Jose J.A.; Somaiah S.; Muddaiah S.; Shetty B.; Reddy G.; Roopa S.                               | A comparative evaluation of interleukin 1 beta and prostaglandin E2 with and without low-level laser therapy during en masse retraction                                                   | 2018 | Contemporary Clinical Dentistry                                   |

|                                                                                                                          |                                                                                                                                                                                                 |      |                                                                                                                      |
|--------------------------------------------------------------------------------------------------------------------------|-------------------------------------------------------------------------------------------------------------------------------------------------------------------------------------------------|------|----------------------------------------------------------------------------------------------------------------------|
| Mankeliya S.; Singhal R.K.; Gupta A.; Jaiswal N.; Pathak V.K.; Kushwah A.                                                | A Comparative Evaluation of Smear Layer Removal by Using Four Different Irrigation Solutions like Root Canal Irrigants: An In Vitro SEM Study                                                   | 2021 | Journal of Contemporary Dental Practice                                                                              |
| Jain P.; Yeluri R.; Garg N.; Mayall S.; Rallan M.; Gupta S.; Pathivada L.                                                | A comparative evaluation of the effectiveness of three different irrigating solution on microorganisms in the root canal: An invivo study                                                       | 2015 | Journal of Clinical and Diagnostic Research                                                                          |
| Chandrasekhar S., Prasad M.G., Radhakrishna A.N., Saujanya K., Raviteja N.V.K., Deepthi B., Ramakrishna J.               | A comparative In vivo efficacy of three spiral techniques versus incremental technique in obturating primary teeth                                                                              | 2018 | Journal of the Indian Society of Pedodontics and Preventive Dentistry                                                |
| Haghanifar S, Moudi E, Mesgarani A, Bijani A, Abbaszadeh N.                                                              | A comparative study of cone-beam computed tomography and digital periapical radiography in detecting mandibular molars root perforations                                                        | 2014 | Imaging Sci Dent                                                                                                     |
| Paul M.P., Amin S., Mayya A., Naik R., Mayya S.S.                                                                        | A comparative study of surface hardness between two bioceramic materials in an experimental apexification model under wet and dry conditions                                                    | 2020 | Open Dentistry Journal                                                                                               |
| Moghadam K.N.; Aghili H.; Mohassel A.R.; Zahedpasha S.; Moghadamnia A.A.                                                 | A comparative study on sealing ability of mineral trioxide aggregate, calcium enriched cement and bone cement in forcai perforations                                                            | 2014 | Minerva Stomatologica                                                                                                |
| Marconyak L.J., Jr.; Kirkpatrick T.C.; Roberts H.W.; Roberts M.D.; Aparicio A.; Himel V.T.; Sabey K.A.                   | A comparison of coronal tooth discoloration elicited by various endodontic reparative materials                                                                                                 | 2016 | Journal of Endodontics                                                                                               |
| Bastawala D.S.; Kapoor S.; Nathani P.                                                                                    | A comparison of coronal tooth discoloration elicited by various endodontic reparative materials MTA plus, bio MTA+, and biodentine: An ex vivo study                                            | 2020 | International Journal of Clinical Pediatric Dentistry                                                                |
| Abazarpour R, Parirokh M, Nakhaee N, Abbott PV.                                                                          | A Comparison of Different Volumes of Articaine for Inferior Alveolar Nerve Block for Molar Teeth with Symptomatic Irreversible Pulpitis                                                         | 2015 | J Endod                                                                                                              |
| Tootla S.; Owen C.P.                                                                                                     | A comparison of endodontic treatment outcomes between HIV-positive and HIV-negative patients.                                                                                                   | 2012 | SADJ : journal of the South African Dental Association = tydskrif van die Suid-Afrikaanse Tandheelkundige Vereniging |
| Kanaa M.D.; Whitworth J.M.; Meechan J.G.                                                                                 | A comparison of the efficacy of 4% articaine with 1:100,000 epinephrine and 2% lidocaine with 1:80,000 epinephrine in achieving pulpal anesthesia in maxillary teeth with irreversible pulpitis | 2012 | Journal of Endodontics                                                                                               |
| Bueno MR, Estrela C.                                                                                                     | A computational modeling method for root canal endoscopy using a specific CBCT filter: A new era in the metaverse of endodontics begins                                                         | 2022 | Braz Dent J                                                                                                          |
| Katge F.; Dixit U.B.                                                                                                     | A cone-beam computed tomographic study of root and root canal morphology of primary maxillary and mandibular second molars in Indian Children: An in vitro study                                | 2022 | Journal of Indian Society of Pedodontics and Preventive Dentistry                                                    |
| Rankin R.; Lundy F.T.; Schock B.C.; Zhang S.-D.; Al-Natour B.; About I.; Irwin C.; Linden G.J.; El-Karim I.A.            | A connectivity mapping approach predicted acetylsalicylic acid (aspirin) to induce osteo/odontogenic differentiation of dental pulp cells                                                       | 2020 | International Endodontic Journal                                                                                     |
| Richert R, Ducret M, Alliot-Licht B, Bekhouche M, Gobert S, Farges JC.                                                   | A critical analysis of research methods and experimental models to study pulpitis                                                                                                               | 2022 | Int Endod J                                                                                                          |
| Zehnder M, Belibasakis GN.                                                                                               | A critical analysis of research methods to study clinical molecular biomarkers in Endodontic research                                                                                           | 2022 | Int Endod J                                                                                                          |
| Timmerman A., Calache H., Parashos P.                                                                                    | A cross sectional and longitudinal study of endodontic and periapical status in an Australian population                                                                                        | 2017 | Australian dental journal                                                                                            |
| Lee AE, Chu EY, Gardner PJ, Duverger O, Saikali A, Wang SK, Gafni RI, Hartley IR, Ten Hagen KG, Somerman MJ, Collins MT. | A Cross-Sectional Cohort Study of the Effects of FGF23 Deficiency and Hyperphosphatemia on Dental Structures in Hyperphosphatemic Familial Tumoral Calcinosis                                   | 2021 | JBMR Plus                                                                                                            |
| Fukai K., Ohno H., Blinkhorn A.                                                                                          | A cross-sectional survey investigating care of the primary dentition by paediatric dental specialists in Japan and the UK                                                                       | 2012 | International Dental Journal                                                                                         |
| Lopes DS, Câmara AC, Aguiar CM, do Nascimento MD, Farias de Araújo L.                                                    | A C-Shaped Canal in a Maxillary Second Molar: Prexion 3D Cone-Beam Computed Tomography Analysis                                                                                                 | 2016 | Acta Stomatol Croat                                                                                                  |

|                                                                                                                   |                                                                                                                                                                                         |      |                                                                      |
|-------------------------------------------------------------------------------------------------------------------|-----------------------------------------------------------------------------------------------------------------------------------------------------------------------------------------|------|----------------------------------------------------------------------|
| Li J.; Rao Z.; Zhao Y.; Xu Y.; Chen L.; Shen Z.; Bai Y.; Lin Z.; Huang Q.                                         | A Decellularized Matrix Hydrogel Derived from Human Dental Pulp Promotes Dental Pulp Stem Cell Proliferation, Migration, and Induced Multidirectional Differentiation In Vitro          | 2020 | Journal of Endodontics                                               |
| Hiraiwa T.; Arijji Y.; Fukuda M.; Kise Y.; Nakata K.; Katsumata A.; Fujita H.; Arijji E.                          | A deep-learning artificial intelligence system for assessment of root morphology of the mandibular first molar on panoramic radiography                                                 | 2019 | Dentomaxillofacial Radiology                                         |
| Li W.; Mao M.; Hu N.; Wang J.; Huang J.; Zhang W.; Gu S.                                                          | A graphene oxide-copper nanocomposite for the regeneration of the dentin-pulp complex: An odontogenic and neurovascularization-inducing material                                        | 2021 | Chemical Engineering Journal                                         |
| Rohrer M.D.; Prasad H.S.; Savord E.G.                                                                             | A histologic assessment of a HYBENX® oral tissue decontaminant in vital pulp therapy in dogs                                                                                            | 2016 | Journal of Biological Regulators and Homeostatic Agents              |
| Furfaro F.; Ang E.S.M.; Lareu R.R.; Murray K.; Goonewardene M.                                                    | A histological and micro-CT investigation in to the effect of NGF and EGF on the periodontal, alveolar bone, root and pulpal healing of replanted molars in a rat model - a pilot study | 2014 | Progress in Orthodontics                                             |
| Borkent D, Smith S, Dixon PM.                                                                                     | A histological and ultrastructural study of equine peripheral caries                                                                                                                    | 2020 | Equine Vet J                                                         |
| Moazzami F.; Ghahramani Y.; Tamaddon A.M.; Dehghani Nazhavani A.; Adl A.                                          | A histological comparison of a new pulp capping material and mineral trioxide aggregate in rat molars                                                                                   | 2013 | Iranian Endodontic Journal                                           |
| Oliveira L.V.; da Silva G.R.; Souza G.L.; Magalhães T.E.A.; Barbosa G.L.R.; Turriani A.P.; Moura C.C.G.           | A laboratory evaluation of cell viability, radiopacity and tooth discoloration induced by regenerative endodontic materials                                                             | 2020 | International Endodontic Journal                                     |
| Germain L.                                                                                                        | A logical rationale for endodontic therapy: understanding the rules of the game.                                                                                                        | 2014 | Dentistry today                                                      |
| Caprioglio A.; Conti V.; Caprioglio C.; Capriog D.                                                                | A long-term retrospective clinical study on MTA pulpotomies in immature permanent incisors with complicated crown fractures                                                             | 2014 | European Journal of Paediatric Dentistry                             |
| Liu W, Martínón-Torres M, Kaifu Y, Wu X, Kono RT, Chang CH, Wei P, Xing S, Huang W, Bermúdez de Castro JM.        | A mandible from the Middle Pleistocene Hexian site and its significance in relation to the variability of Asian Homo erectus                                                            | 2017 | Am J Phys Anthropol                                                  |
| Nabavi S, Rezaei M, Rahbaryfar S.                                                                                 | A Maxillary Lateral Incisor with Type V Canal Morphology: A Case Report                                                                                                                 | 2022 | Iran Endod J                                                         |
| Geeta I.B.; Galagali G.; Sangeeta K.; Pushpa S.; Noushin F.                                                       | A natuarel meliorate: Revolutionary tissue engineering in endodontics                                                                                                                   | 2013 | Journal of Clinical and Diagnostic Research                          |
| Pinchi V, Pradella F, Buti J, Baldinotti C, Focardi M, Norelli GA.                                                | A new age estimation procedure based on the 3D CBCT study of the pulp cavity and hard tissues of the teeth for forensic purposes: A pilot study                                         | 2015 | J Forensic Leg Med                                                   |
| Elena R., Meri P., Marija S., Mira J., Radeska-Panovska A., Elizabeta G.                                          | A new calcium-silicate cement in the endodontic treatment of immature permanent teeth: A report of two cases                                                                            | 2017 | Research Journal of Pharmaceutical, Biological and Chemical Sciences |
| Beretta M.; Federici Canova F.                                                                                    | A new method for deep caries treatment in primary teeth using ozone: A retrospective study                                                                                              | 2017 | European Journal of Paediatric Dentistry                             |
| Gandolfi MG.                                                                                                      | A New Method for Evaluating the Diffusion of Ca(2+) and OH(-) Ions through Coronal Dentin into the Pulp                                                                                 | 2012 | Iran Endod J                                                         |
| Mohanty R.; Lenka B.; Nayak R.; Satpathy A.; Das A.C.; Mohanty G.                                                 | A new pioneering advancement: Waterlase                                                                                                                                                 | 2020 | Indian Journal of Forensic Medicine and Toxicology                   |
| Lo Giudice G., Lizio A.S., Lo Giudice R.                                                                          | A new software architecture proposal for an evidence-based decision support system in dentistry                                                                                         | 2021 | Minerva Dental and Oral Science                                      |
| Robberecht L.; Chai F.; Dehurtevent M.; Marchandise P.; Bécavin T.; Hornez J.-C.; Deveaux E.                      | A novel anatomical ceramic root canal simulator for endodontic training                                                                                                                 | 2017 | European Journal of Dental Education                                 |
| Iohara K, Murakami M, Takeuchi N, Osako Y, Ito M, Ishizaka R, Utunomiya S, Nakamura H, Matsushita K, Nakashima M. | A novel combinatorial therapy with pulp stem cells and granulocyte colony-stimulating factor for total pulp regeneration                                                                | 2013 | Stem Cells Transl Med                                                |

|                                                                                                    |                                                                                                                                                                                                          |      |                                                                                                                      |
|----------------------------------------------------------------------------------------------------|----------------------------------------------------------------------------------------------------------------------------------------------------------------------------------------------------------|------|----------------------------------------------------------------------------------------------------------------------|
| Turkkahraman H, Galindo F, Tulu US, Helms JA.                                                      | A novel hypothesis based on clinical, radiological, and histological data to explain the dentinogenesis imperfecta type II phenotype                                                                     | 2020 | Connect Tissue Res                                                                                                   |
| Li J.; Wang Z.                                                                                     | A novel NUTM2A-AS1/miR-769-5p axis regulates LPS-evoked damage in human dental pulp cells via the TLR4/MYD88/NF-κB signaling                                                                             | 2022 | Journal of Dental Sciences                                                                                           |
| Cassim I.                                                                                          | A novel use of the Reciproc R25 Endodontic file for root canal obturation                                                                                                                                | 2014 | SADJ : journal of the South African Dental Association = tydskrif van die Suid-Afrikaanse Tandheelkundige Vereniging |
| Foley J.I.                                                                                         | A pan-European comparison of the use of mineral trioxide aggregate (MTA) by postgraduates in paediatric dentistry                                                                                        | 2013 | European Archives of Paediatric Dentistry                                                                            |
| Sánchez-Lara y Tajonar R.G.; Vergara-Tinoco J.V.; Dammaschke T.; Domínguez-Pérez R.A.              | A Pilot Feasibility Study to Establish Full Pulpotomy in Mature Permanent Teeth with Symptomatic Irreversible Pulpitis as a Routine Treatment in Mexican Public Healthcare Services                      | 2022 | Healthcare (Switzerland)                                                                                             |
| Shallal-Ayzin M.; Trinh T.; Yeung W.; Tawil P.Z.; Haggerty C.L.; Wu D.; Khan A.A.                  | A Prospective Analysis of the Correlation Between Postoperative Pain and Vital Pulp Therapy                                                                                                              | 2021 | Frontiers in Dental Medicine                                                                                         |
| Mente J.; Petrovic J.; Gehrig H.; Rampf S.; Michel A.; Schürz A.; Pfefferle T.; Saure D.; Erber R. | A Prospective Clinical Pilot Study on the Level of Matrix Metalloproteinase-9 in Dental Pulpal Blood as a Marker for the State of Inflammation in the Pulp Tissue                                        | 2016 | Journal of Endodontics                                                                                               |
| Gufran K, Mirza MB, Robaian A, Alqahtani AS, Alqhtani NR, Alasqah M, Alsakr AM.                    | A Prospective Clinical Study Evaluating the Efficacy of Intra-Ligamentary Anesthetic Solutions in Mandibular Molars Diagnosed as Symptomatic Irreversible Pulpitis with Symptomatic Apical Periodontitis | 2022 | Healthcare (Basel)                                                                                                   |
| Careddu R, Duncan HF.                                                                              | A prospective clinical study investigating the effectiveness of partial pulpotomy after relating preoperative symptoms to a new and established classification of pulpitis                               | 2021 | Int Endod J                                                                                                          |
| Willershausen B, Willershausen I, Ehlers V, Azaripour A, Briseño B.                                | A prospective clinical trial on the influence of a triamcinolone/demeclocycline and a calcium hydroxide based temporary cement on pain perception                                                        | 2012 | Head Face Med                                                                                                        |
| Kanaa M.D.; Whitworth J.M.; Meechan J.G.                                                           | A prospective randomized trial of different supplementary local anesthetic techniques after failure of inferior alveolar nerve block in patients with irreversible pulpitis in mandibular teeth          | 2012 | Journal of Endodontics                                                                                               |
| Lee J.H.                                                                                           | A radiologic view of migration of a foreign body in the maxillary sinus by mucociliary movement                                                                                                          | 2015 | Ear, Nose and Throat Journal                                                                                         |
| Petel R.; Ziskind K.; Bernfeld N.; Suliman H.; Fuks A.B.; Moskovitz M.                             | A randomised controlled clinical trial comparing pure Portland cement and formocresol pulpotomies followed from 2 to 4 years                                                                             | 2021 | European Archives of Paediatric Dentistry                                                                            |
| Alsanouni M.; Bawazir O.A.                                                                         | A Randomized Clinical Trial of NeoMTA Plus in Primary Molar Pulpotomies                                                                                                                                  | 2019 | Pediatric dentistry                                                                                                  |
| Rubanenko M.; Petel R.; Tickotsky N.; Fayer I.; Fuks A.B.; Moskovitz M.                            | A Randomized Controlled Clinical Trial Comparing Tricalcium Silicate and Formocresol Pulpotomies Followed for Two to Four Years                                                                          | 2019 | Pediatric dentistry                                                                                                  |
| Song M.; Kang M.; Kim H.-C.; Kim E.                                                                | A randomized controlled study of the use of proroot mineral trioxide aggregate and endocem as direct pulp capping materials                                                                              | 2015 | Journal of Endodontics                                                                                               |
| Jang Y., Song M., Yoo I.-S., Song Y., Roh B.-D., Kim E.                                            | A Randomized Controlled Study of the Use of ProRoot Mineral Trioxide Aggregate and Endocem as Direct Pulp Capping Materials: 3-month versus 1-year Outcomes                                              | 2015 | Journal of endodontics                                                                                               |
| Cordell S.; Kratunova E.; Marion I.; Alrayyes S.; Alapati S.B.                                     | A randomized controlled trial comparing the success of mineral trioxide aggregate and ferric sulfate as pulpotomy medicaments for primary molars                                                         | 2021 | Journal of Dentistry for Children                                                                                    |
| Dhyani V.K., Chhabra S., Sharma V.K., Dhyani A.                                                    | A randomized controlled trial to evaluate the incidence of postoperative pain and flare-ups in single and multiple visits root canal treatment                                                           | 2022 | Medical Journal Armed Forces India                                                                                   |

|                                                                                                                    |                                                                                                                                                                 |      |                                                                   |
|--------------------------------------------------------------------------------------------------------------------|-----------------------------------------------------------------------------------------------------------------------------------------------------------------|------|-------------------------------------------------------------------|
| Yassaei S., Sharifi M., Ebrahiminik Z.                                                                             | A rare case of bilateral double incisors; Early orthodontic management                                                                                          | 2021 | Clinical Case Reports                                             |
| Bonavolontà P.; Dell'Aversana Orabona G.; Seidita F.; Donna P.; Committeri U.; Abbate V.; D'Andrea L.; Califano L. | A rare case of blindness due to an odontogenic abscess                                                                                                          | 2020 | Chirurgia (Turin)                                                 |
| Saxena A.; Singh A.; Ikhar A.; Chandak M.                                                                          | A rare case of maxillary first molar with single root and single canal diagnosed using spiral computed tomographic scan                                         | 2014 | Journal of Indian Society of Pedodontics and Preventive Dentistry |
| Assunção GSM, Ocarino NM, Sofal LC, Serakides R.                                                                   | A Rare Case of Radicular Dens Invaginatus (Dens in Dente) in a Dog                                                                                              | 2020 | J Comp Pathol                                                     |
| Karwa S., Shiggaon L., Waghmare A., Dhavan M.                                                                      | A regenerative approach using xenograft and PRF membrane in the management of mucosal fenestration in posterior maxilla-A rare case report                      | 2021 | Journal of Indian Society of Periodontology                       |
| Manivannan S., Mani G., Thamaraiselvan M.                                                                          | A retrospective analysis of the most frequently root canal treated tooth in pediatric patients visiting a university hospital in Chennai                        | 2020 | Indian Journal of Forensic Medicine and Toxicology                |
| Ciftci V.; Yazicioglu İ.                                                                                           | A retrospective comparison of dental treatment under general anesthesia provided for uncooperative healthy patients and patients with special health care needs | 2020 | Journal of Clinical Pediatric Dentistry                           |
| Kaya B.U., Kececi A.D., Guldaz H.E., Orhan H.                                                                      | A retrospective radiographic study of coronal-periapical status and root canal filling quality in a selected adult Turkish population                           | 2013 | Medical Principles and Practice                                   |
| Sultana A., Joysuwal R., Nikhita A., Rajeshwari R., Fathima A., Kadam A.                                           | A review on potassium nitrate, chlorhexidine gluconate and hydrogen peroxide toothpaste formulation to treat sensitivity, bleeding gums & whitening of teeth    | 2021 | Journal of Global Trends in Pharmaceutical Sciences               |
| Rathi C., Chandak M., Chandak M., Bajaj P., Chandak P.                                                             | A review on safety endodontic management in pregnancy                                                                                                           | 2020 | International Journal of Research in Pharmaceutical Sciences      |
| Meng H, Hu L, Zhou Y, Ge Z, Wang H, Wu CT, Jin J.                                                                  | A Sandwich Structure of Human Dental Pulp Stem Cell Sheet, Treated Dentin Matrix, and Matrigel for Tooth Root Regeneration                                      | 2020 | Stem Cells Dev                                                    |
| Gaurav V.; Srivastava N.; Rana V.; Adlakha V.                                                                      | A study of root canal morphology of human primary incisors and molars using cone beam computerized tomography: An in vitro study                                | 2013 | Journal of Indian Society of Pedodontics and Preventive Dentistry |
| Wellman K.Y.; Dixon P.M.                                                                                           | A Study on the Potential Role of Occlusal Fissure Fractures in the Etiopathogenesis of Equine Cheek Teeth Apical Infections                                     | 2019 | Journal of Veterinary Dentistry                                   |
| Chin J.S., Thomas M.B., Locke M., Dummer P.M.                                                                      | A survey of dental practitioners in Wales to evaluate the management of deep carious lesions with vital pulp therapy in permanent teeth                         | 2016 | British dental journal                                            |
| Foley J.                                                                                                           | A survey of paediatric caries management teaching within dental therapy programmes in the UK                                                                    | 2017 | British Dental Journal                                            |
| Halawany H.S., Salama F., Jacob V., Abraham N.B., Moharib T.N.B., Alazmah A.S., Al Harbi J.A.                      | A survey of pediatric dentists' caries-related treatment decisions and restorative modalities – A web-based survey                                              | 2017 | Saudi Dental Journal                                              |
| Lopes-Fatturi A., de Souza J.F., Menezes J.V.N.B., Fraiz F.C., Assunção L.R.D.S.                                   | A survival analysis of different pulp therapies in decayed primary teeth                                                                                        | 2020 | Pesquisa Brasileira em Odontopediatria e Clínica Integrada        |
| Coll J.A., Vargas K., Marghalani A.A., Chen C.-Y., AlShamali S., Dhar V., Crystal Y.O.                             | A Systematic Review and Meta-Analysis of Nonvital Pulp Therapy for Primary Teeth                                                                                | 2020 | Pediatric dentistry                                               |
| do Couto A.M.; Espaladori M.C.; Leite A.P.P.; Martins C.C.; de Aguiar M.C.F.; Abreu L.G.                           | A Systematic Review of Pulp Revascularization Using a Triple Antibiotic Paste                                                                                   | 2019 | Pediatric dentistry                                               |
| Fathi Z, Rahimi S, Tavakoli R, Amini M.                                                                            | A Three-rooted Mandibular Second Premolar: A Case Report                                                                                                        | 2014 | J Dent Res Dent Clin Dent Prospects                               |
| Deepalakshmi M.; Rajasekaran M.S.; Kumar A.; Indira R.; Ramachandran S.                                            | Aberrant canal configuration of the maxillary first molar: A case report                                                                                        | 2012 | Journal of Clinical and Diagnostic Research                       |
| Rajalbandi S.; Shingte S.N.; Sundaresh K.J.; Mallikarjuna R.                                                       | Aberration in the palatal root of the maxillary first molar                                                                                                     | 2013 | BMJ Case Reports                                                  |
| Wang Y.; Zhai S.; Wang H.; Jia Q.; Jiang W.; Zhang X.; Zhang A.; Liu J.; Ni L.                                     | Absent in melanoma 2 (AIM2) in rat dental pulp mediates the inflammatory response during pulpitis                                                               | 2013 | Journal of Endodontics                                            |

|                                                                                                    |                                                                                                                                                                              |      |                                                                                                             |
|----------------------------------------------------------------------------------------------------|------------------------------------------------------------------------------------------------------------------------------------------------------------------------------|------|-------------------------------------------------------------------------------------------------------------|
| Efthymiou A.; Marques M.M.; Franzen R.; Moreira M.S.; Gutknecht N.                                 | Acceptance and efficiency of anesthesia by photobiomodulation therapy during conventional cavity preparation in permanent teeth: a pilot randomized crossover clinical study | 2017 | Lasers in Dental Science                                                                                    |
| Lugliè P.F.; Grabesu V.; Spano G.; Lumbau A.                                                       | Accessory foramina in the furcation area of primary molars. A SEM investigation                                                                                              | 2012 | European Journal of Paediatric Dentistry                                                                    |
| Libotte F., Ciolfi C., Romeo U.                                                                    | Accessory root canals: Tips and tricks                                                                                                                                       | 2017 | Dental Cadmos                                                                                               |
| Li J, Pan YH, Zhao Y, Li L.                                                                        | Accuracy of 3D reconstruction of pulp cavity in mandibular premolars based on cone-beam CT                                                                                   | 2018 | Shanghai Kou Qiang Yi Xue                                                                                   |
| Hazard M.L.; Wicker C.; Qian F.; Williamson A.E.; Teixeira F.B.                                    | Accuracy of cold sensibility testing on teeth with full-coverage restorations: a clinical study                                                                              | 2021 | International Endodontic Journal                                                                            |
| Matos F.S.; Cunha T.C.; Ribeiro M.A.G.; Araujo C.S.; Bernardino Í.M.; Moura C.C.G.; Paranhos L.R.  | Accuracy of the dental pulp sensibility test using cold spray for the diagnosis of pulp diseases: An observational clinical study                                            | 2021 | Bioscience Journal                                                                                          |
| Medina-Fernandez I , Celiz AD .                                                                    | Acellular biomaterial strategies for endodontic regeneration                                                                                                                 | 2019 | Biomater Sci                                                                                                |
| Vu T.T., Nguyen M.T., Sangvanich P., Nguyen Q.N., Thunyakitpisal P.                                | Acemannan used as an implantable biomaterial for vital pulp therapy of immature permanent teeth induced continued root formation                                             | 2020 | Pharmaceutics                                                                                               |
| Azim A.A.; Azim K.A.; Deutsch A.S.; Huang G.T.-J.                                                  | Acquisition of anatomic parameters concerning molar pulp chamber landmarks using cone-beam computed tomography                                                               | 2014 | Journal of endodontics                                                                                      |
| Zhai Y.; Wang Y.; Rao N.; Li J.; Li X.; Fang T.; Zhao Y.; Ge L.                                    | Activation and Biological Properties of Human $\beta$ Defensin 4 in Stem Cells Derived From Human Exfoliated Deciduous Teeth                                                 | 2019 | Frontiers in Physiology                                                                                     |
| Ma L.; Wang S.C.; Tong J.; Hu Y.; Zhang Y.Q.; Yu Q.                                                | Activation and dynamic expression of Notch signalling in dental pulp cells after injury in vitro and in vivo                                                                 | 2016 | International Endodontic Journal                                                                            |
| He Q.; Wang H.; Fan M.; Zhang L.; Huang S.; Li Y.                                                  | Activation of autophagy in pulpitis is associated with TLR4                                                                                                                  | 2017 | International Journal of Clinical and Experimental Pathology                                                |
| Yang F.; Li Y.; Duan H.; Wang H.; Pei F.; Chen Z.; Zhang L.                                        | Activation of mitophagy in inflamed odontoblasts                                                                                                                             | 2019 | Oral Diseases                                                                                               |
| Jiang W.; Lv H.; Wang H.; Wang D.; Sun S.; Jia Q.; Wang P.; Song B.; Ni L.                         | Activation of the NLRP3/caspase-1 inflammasome in human dental pulp tissue and human dental pulp fibroblasts                                                                 | 2015 | Cell and Tissue Research                                                                                    |
| Filippini H.F.; Scalzilli P.A.; Costa K.M.; Freitas R.D.S.; Campos M.M.                            | Activation of trigeminal ganglion satellite glial cells in CFA-induced tooth pulp pain in rats                                                                               | 2018 | PLoS ONE                                                                                                    |
| Selvakumar DR, Krishnamoorthy S, Venkatesan K, Ramanathan A, Abbott PV, Angambakkam Rajasekaran P. | Active Bacteria in Carious Dentin of Mandibular Molars with Different Pulp Conditions: An In Vivo Study                                                                      | 2021 | J Endod                                                                                                     |
| Katifelis H, Sioziou A, Gazouli M, Emmanouil D.                                                    | ACTN2 (rs6656267) and MPPED2 (rs11031093 and rs536007) polymorphisms in primary dentition caries: A case-control study                                                       | 2020 | Int J Paediatr Dent                                                                                         |
| Haug S.R.; Marthinussen M.C.                                                                       | Acute dental pain and salivary biomarkers for stress and inflammation in patients with pulpal or periapical inflammation                                                     | 2019 | Journal of Oral and Facial Pain and Headache                                                                |
| Gürler E.B.; İriboz E.; Kaya Ö.T.Ç.; Türkaydin D.; Öveçoğlu H.S.                                   | Acute dental pain elevates salivary oxytocin in women: a risk factor during pregnancy                                                                                        | 2021 | General dentistry                                                                                           |
| Vailati F.; Gruetter L.; Belser U.C.                                                               | Adhesively restored anterior maxillary dentitions affected by severe erosion: up to 6-year results of a prospective clinical study.                                          | 2013 | The European journal of esthetic dentistry : official journal of the European Academy of Esthetic Dentistry |
| Xu X, Liang C, Gao X, Huang H, Xing X, Tang Q, Yang J, Wu Y, Li M, Li H, Liao L, Tian W.           | Adipose Tissue-derived Microvascular Fragments as Vascularization Units for Dental Pulp Regeneration                                                                         | 2021 | J Endod                                                                                                     |
| Winderlich J.N.; Kremer K.L.; Koblar S.A.                                                          | Adult human dental pulp stem cells promote blood-brain barrier permeability through vascular endothelial growth factor- $\alpha$ expression                                  | 2016 | Journal of Cerebral Blood Flow and Metabolism                                                               |
| Rôças I.N.; Lima K.C.; Assunção I.V.; Gomes P.N.; Bracks I.V.; Siqueira J.F., Jr.                  | Advanced Caries Microbiota in Teeth with Irreversible Pulpitis                                                                                                               | 2015 | Journal of Endodontics                                                                                      |

|                                                                                                                        |                                                                                                                                                                   |      |                                           |
|------------------------------------------------------------------------------------------------------------------------|-------------------------------------------------------------------------------------------------------------------------------------------------------------------|------|-------------------------------------------|
| Andrade VM, Fontenele RC, de Souza AC, Almeida CA, Vieira AC, Groppo FC, Freitas DQ, Junior ED.                        | Age and sex estimation based on pulp cavity volume using cone beam computed tomography: development and validation of formulas in a Brazilian sample              | 2019 | Dentomaxillofac Radiol                    |
| Nemsi H, Haj Salem N, Bouanene I, Ben Jomaa S, Belhadj M, Mosrati MA, Aïssaoui A, Ben Amor F, Chadly A.                | Age assessment in canine and premolar by cervical axial sections of cone-beam computed tomography                                                                 | 2017 | Leg Med (Tokyo)                           |
| Sakuma A, Saitoh H, Suzuki Y, Makino Y, Inokuchi G, Hayakawa M, Yajima D, Iwase H.                                     | Age estimation based on pulp cavity to tooth volume ratio using postmortem computed tomography images                                                             | 2013 | J Forensic Sci                            |
| Gulsahi A, Kulah CK, Bakirarar B, Gulen O, Kamburoglu K.                                                               | Age estimation based on pulp/tooth volume ratio measured on cone-beam CT images                                                                                   | 2018 | Dentomaxillofac Radiol                    |
| Alharbi HS Sr, Alharbi AM, Alenazi AO, Kolarikodi SH, Elmoazen R.                                                      | Age Estimation by Kvaal's Method Using Digital Panoramic Radiographs in the Saudi Population                                                                      | 2022 | Cureus                                    |
| Koranne VV, Mhapuskar AA, Marathe SP, Joshi SA, Saddiwal RS, Nisa SU.                                                  | Age estimation in Indian adults by the coronal pulp cavity index                                                                                                  | 2017 | J Forensic Dent Sci                       |
| Badar SB, Ghafoor R, Khan FR, Hameed MH.                                                                               | Age estimation of a sample of Pakistani population using Coronal Pulp Cavity Index in molars and premolars on Orthopantomogram                                    | 2016 | J Pak Med Assoc                           |
| Karkhanis S, Mack P, Franklin D.                                                                                       | Age estimation standards for a Western Australian population using the coronal pulp cavity index                                                                  | 2013 | Forensic Sci Int                          |
| Talabani RM, Baban MT, Mahmood MA.                                                                                     | Age estimation using lower permanent first molars on a panoramic radiograph: A digital image analysis                                                             | 2015 | J Forensic Dent Sci                       |
| Timme M, Borkert J, Nagelmann N, Streeter A, Karch A, Schmeling A.                                                     | Age-dependent decrease in dental pulp cavity volume as a feature for age assessment: a comparative in vitro study using 9.4-T UTE-MRI and CBCT 3D imaging         | 2021 | Int J Legal Med                           |
| Ning T.; Shao J.; Zhang X.; Luo X.; Huang X.; Wu H.; Xu S.; Wu B.; Ma D.                                               | Ageing affects the proliferation and mineralization of rat dental pulp stem cells under inflammatory conditions                                                   | 2020 | International Endodontic Journal          |
| Aslantas E.E.; Buzoglu H.D.; Karapinar S.P.; Cehreli Z.C.; Muftuoglu S.; Atilla P.; Aksoy Y.                           | Age-related Changes in the Alkaline Phosphatase Activity of Healthy and Inflamed Human Dental Pulp                                                                | 2016 | Journal of Endodontics                    |
| Sue M, Oda T, Sasaki Y, Ogura I.                                                                                       | Age-related changes in the pulp chamber of maxillary and mandibular molars on cone-beam computed tomography images                                                | 2018 | Oral Radiol                               |
| Dosedělová H, Štěpánková K, Zikmund T, Lesot H, Kaiser J, Novotný K, Štembírek J, Knotek Z, Zahradníček O, Buchtová M. | Age-related changes in the tooth-bone interface area of acrodont dentition in the chameleon                                                                       | 2016 | J Anat                                    |
| Vehkalahti M.M.; Palotie U.; Valaste M.                                                                                | Age-specific findings on endodontic treatments performed by private dentists in Finland in 2012 and 2017: a nationwide register-based observation                 | 2020 | International Endodontic Journal          |
| Shen S.; Shang L.; Liu H.; Liang Q.; Liang W.; Ge S.                                                                   | AGGF1 inhibits the expression of inflammatory mediators and promotes angiogenesis in dental pulp cells                                                            | 2021 | Clinical Oral Investigations              |
| Lee Y.-H.; Kim G.-E.; Cho H.-J.; Yu M.-K.; Bhattarai G.; Lee N.-H.; Yi H.-K.                                           | Aging of in vitro pulp illustrates change of inflammation and dentinogenesis                                                                                      | 2013 | Journal of Endodontics                    |
| Huang S.; Song Z.; Huang Q.; Jiang L.; Chen L.; Wang R.; Lin Z.                                                        | AIM2 Inflammasome Is Critical for dsDNA-Induced IL-1 $\beta$ Secretion in Human Dental Pulp Cells                                                                 | 2018 | Inflammation                              |
| Ho S.-W.; Lue K.-H.; Ku M.-S.                                                                                          | Allergic rhinitis, rather than asthma, might be associated with dental caries, periodontitis, and other oral diseases in adults                                   | 2019 | PeerJ                                     |
| Elheeny A.A.H.                                                                                                         | Allium sativum extract as an irrigant in pulpectomy of primary molars: A 12-month short-term evaluation                                                           | 2019 | Clinical and experimental dental research |
| Cordero C.B.; Santander G.M.; González D.U.; Quezada A.; Silva C.I.; Vásquez C.; Jara R.; Jara D.; Khoury M.           | Allogeneic Cellular Therapy in a Mature Tooth with Apical Periodontitis and Accidental Root Perforation: A Case Report                                            | 2020 | Journal of Endodontics                    |
| Iohara K.; Utsunomiya S.; Kohara S.; Nakashima M.                                                                      | Allogeneic transplantation of mobilized dental pulp stem cells with the mismatched dog leukocyte antigen type is safe and efficacious for total pulp regeneration | 2018 | Stem Cell Research and Therapy            |
| Grawish M.E.-A.; Khounanian R.; Hamam M.K.; Zaher A.R.; Hegazy D.; El-Negoly S.A.E.-R.; Hassan G.; Zyada M.M.          | Altered coronal tissue of the human dental pulp in chronic hepatitis C virus infected patients                                                                    | 2013 | Journal of Endodontics                    |

|                                                                                                                                                       |                                                                                                                                                                    |      |                                                                                                              |
|-------------------------------------------------------------------------------------------------------------------------------------------------------|--------------------------------------------------------------------------------------------------------------------------------------------------------------------|------|--------------------------------------------------------------------------------------------------------------|
| Gonzalez Marrero Y.; Kobayashi Y.; Ihsan M.S.; Pilch L.A.; Chen L.; Jiang S.; Ye Y.; Fine D.H.; Falcon C.Y.; Falcon P.A.; Hirschberg C.S.; Shimizu E. | Altered Prevalence of Pulp Diagnoses in Diabetes Mellitus Patients: A Retrospective Study                                                                          | 2022 | Journal of Endodontics                                                                                       |
| Mello B.Z., Stafuzza T.C., Vitor L.L., Rios D., Machado M.A., Oliveira T.M.                                                                           | Alternative approach for carious tissue removal in primary teeth                                                                                                   | 2016 | European archives of paediatric dentistry : official journal of the European Academy of Paediatric Dentistry |
| Agarwal R.; Chaudhry K.; Yeluri R.; Singh C.; Munshi A.K.                                                                                             | Alternative approach to management of early loss of second primary molar: a clinical case report.                                                                  | 2014 | Journal of the California Dental Association                                                                 |
| Santamaría R.M.; Innes N.P.T.; Machiulskiene V.; Schmoedel J.; Alkilzy M.; Splieth C.H.                                                               | Alternative Caries Management Options for Primary Molars: 2.5-Year Outcomes of a Randomised Clinical Trial                                                         | 2018 | Caries Research                                                                                              |
| Hussain M.I.; Bashir A.K.M.; Zakir Hossain Shikder A.H.M.                                                                                             | Alternative Management of Acute Irreversible Pulpitis of an Adult HIV-Positive Patient: A Case Report                                                              | 2021 | Bangladesh Medical Research Council Bulletin                                                                 |
| de Amorim R.G., Leal S.C., Mulder J., Creugers N.H., Frencken J.E.                                                                                    | Amalgam and ART restorations in children: a controlled clinical trial                                                                                              | 2014 | Clinical oral investigations                                                                                 |
| Huang Y, Goldberg M, Le T, Qiang R, Warner D, Witkowska HE, Liu H, Zhu L, Denbesten P, Li W.                                                          | Amelogenin exons 8 and 9 encoded peptide enhances leucine rich amelogenin peptide mediated dental pulp repair                                                      | 2012 | Cells Tissues Organs                                                                                         |
| Abou Chedid JC, Mchayleh N, Khalil I, Melki B, Hardan LS.                                                                                             | An 18 month evaluation of MM-MTA pulpotomy on primary decayed molars                                                                                               | 2015 | Odontostomatol Trop                                                                                          |
| Subramanyam D.                                                                                                                                        | An aesthetic reconstruction of grossly decayed primary anterior teeth - A case report                                                                              | 2020 | International Journal of Pharmaceutical Sciences and Research                                                |
| Hughes-Stamm S, Warnke F, van Daal A.                                                                                                                 | An alternate method for extracting DNA from environmentally challenged teeth for improved DNA analysis                                                             | 2016 | Leg Med (Tokyo)                                                                                              |
| Yong J.B., Sivarajan S., Abbott P.V.                                                                                                                  | An analysis of the timing and materials associated with pulp disease following restorative dental treatment                                                        | 2018 | International endodontic journal                                                                             |
| Akram A.; Zamzam R.; Mohamad N.B.; Abdullah D.; Meerah S.M.                                                                                           | An assessment of the prescribing skills of undergraduate dental students in malaysia                                                                               | 2012 | Journal of Dental Education                                                                                  |
| Fujii R, Muramatsu T, Yamaguchi Y, Asai T, Aida N, Suehara M, Morinaga K, Furusawa M.                                                                 | An endodontic-periodontal lesion with primary periodontal disease: a case report on its bacterial profile                                                          | 2014 | Bull Tokyo Dent Coll                                                                                         |
| Othman N.I.; Ismail H.U.; Mohammad N.; Ghazali N.; Alauddin M.S.                                                                                      | An Evaluation on Deep Caries Removal Method and Management Performed by Undergraduate Dental Students: A Malaysia Experience                                       | 2021 | European Journal of Dentistry                                                                                |
| Khirtika S.G., Ramesh S.                                                                                                                              | An evidence based decision analysis for criteria for selection of post endodontic restoration                                                                      | 2017 | Journal of Pharmaceutical Sciences and Research                                                              |
| Pourhajibagher M.; Raoofian R.; Ghorbanzadeh R.; Bahador A.                                                                                           | An experimental study for rapid detection and quantification of endodontic microbiota following photo-activated disinfection via new multiplex real-time PCR assay | 2018 | Photodiagnosis and Photodynamic Therapy                                                                      |
| Zhang YA, Guan WQ, Li Q, Liu LL.                                                                                                                      | An experimental study of simvastatin-collagen composite sponge as a direct pulp capping material in rat molars                                                     | 2019 | Hua Xi Kou Qiang Yi Xue Za Zhi                                                                               |
| Bashyam R.; Krishnan R.; Murali K.; Selvarajan N.B.; Vasaviah S.K.; Duraisamy V.                                                                      | An in vitro assessment of the apical sealing ability of mta plus and biodentin                                                                                     | 2021 | International Journal of Current Research and Review                                                         |
| Singh G.; Elshamy F.M.M.; Homeida H.E.; Boreak N.; Gupta I.                                                                                           | An in vitro comparison of antimicrobial activity of three endodontic sealers with different composition                                                            | 2016 | Journal of Contemporary Dental Practice                                                                      |
| Mandrol P.S.; Bhat K.; Prabhakar A.R.                                                                                                                 | An in vitro evaluation of cytotoxicity of curcumin against human dental pulp fibroblasts                                                                           | 2016 | Journal of Indian Society of Pedodontics and Preventive Dentistry                                            |
| Sangwan B.; Rishi R.; Sea M.; Jain K.; Dutt P.; Talukdar P.                                                                                           | An in vitro evaluation of fracture resistance of endodontically treated teeth with different restorative materials                                                 | 2016 | Journal of Contemporary Dental Practice                                                                      |
| Datta P.; Zahir S.; Kundu G.K.; Dutta K.                                                                                                              | An in vitro study of root canal system of human primary molars by using multidetector computed tomography                                                          | 2019 | Journal of Indian Society of Pedodontics and Preventive Dentistry                                            |



|                                                                                                                                                                                          |                                                                                                                                                                                                                                                                                    |      |                                                                      |
|------------------------------------------------------------------------------------------------------------------------------------------------------------------------------------------|------------------------------------------------------------------------------------------------------------------------------------------------------------------------------------------------------------------------------------------------------------------------------------|------|----------------------------------------------------------------------|
| Paludo L.; de Souza S.L.; S6 M.V.R.; da Rosa R.A.; Vier-Pelisser F.V.; Duarte M.A.H.                                                                                                     | An in vivo radiographic evaluation of the accuracy of apex and ipex electronic apex locators                                                                                                                                                                                       | 2012 | Brazilian Dental Journal                                             |
| Pereira KF, Silva PG, Vicente FS, Arashiro FN, Coldebella CR, Ramos CA.                                                                                                                  | An in vivo study of working length determination with a new apex locator                                                                                                                                                                                                           | 2014 | Braz Dent J                                                          |
| Nugraha A.P., Ramadhani N.F., Saputra D., Mappananrang R.A., Purnamasari A.E., Anwar A.A., Ridwan R.D., Kharisma V.D., Nugraha A.P., Noor T.N.E.T.A., Nawira, Widjiastuti I., Yuanita T. | An Insight of Proanthocyanidin and Polyamidoamine-Calcium Phosphate Nanoparticles as Biomaterial Candidate for Dentin regeneration in Dental Pulp Capping: A Narrative Review                                                                                                      | 2022 | Research Journal of Pharmacy and Technology                          |
| Liaw J.J.-L., Park J.H., Chang C.-C., Wang S.-H., Tsai B.M.-Y.                                                                                                                           | An interdisciplinary approach to orthodontic treatment of a mutilated Class III malocclusion with mini-implants, dental implants, and an autotransplant                                                                                                                            | 2022 | Journal of Esthetic and Restorative Dentistry                        |
| Ahmed F.; Anupama Nayak P.; Rao A.; Rao A.                                                                                                                                               | An overview of non-syndromic mesotaurodontism in bilateral primary mandibular first molars: A rare case report                                                                                                                                                                     | 2020 | International Journal of Clinical Dentistry                          |
| Dantas Costa L.E.; de Sousa S.A.; Serpa E.B.M.; Duarte R.C.                                                                                                                              | An overview of teaching of pulp therapy in primary teeth in undergraduate dental courses; Panorama do ensino da terapia pulpar em dentes decíduos nos cursos de graduação em odontologia                                                                                           | 2012 | Pesquisa Brasileira em Odontopediatria e Clínica Integrada           |
| Botelho J.; Mascarenhas P.; Viana J.; Proença L.; Orlandi M.; Leira Y.; Chambrone L.; Mendes J.J.; Machado V.                                                                            | An umbrella review of the evidence linking oral health and systemic noncommunicable diseases                                                                                                                                                                                       | 2022 | Nature Communications                                                |
| Alklayb S.A., Divakar D.D.                                                                                                                                                               | An uncommon tooth fusion of mandibular primary lateral incisor with canine                                                                                                                                                                                                         | 2021 | Clinics and Practice                                                 |
| Rajasekaran S.; Sargod S.S.; Bhat S.S.                                                                                                                                                   | AN UNUSUAL CASE OF DENS IN DENTE WITH RAREFYING OSTEITIS                                                                                                                                                                                                                           | 2021 | International Journal of Clinical Dentistry                          |
| Laham A.; Clouet R.; del Valle G.A.; Gaudin A.; Prud'homme T.                                                                                                                            | Anaesthetic efficacy and influence on cardiovascular parameters change of intraosseous computerised anaesthesia versus inferior alveolar nerve block anaesthesia in acute irreversible pulpitis of mandibular molars: study protocol for a prospective randomised controlled trial | 2022 | Trials                                                               |
| Romero S.S.B.; Lee Y.-C.; Fuh L.-J.; Chung H.-Y.; Hung S.-Y.; Chen Y.-H.                                                                                                                 | Analgesic and neuroprotective effects of electroacupuncture in a dental pulp injury model-a basic research                                                                                                                                                                         | 2020 | International Journal of Molecular Sciences                          |
| Pavithra P.; Dhanraj M.; Sekhar P.                                                                                                                                                       | Analgesic effectiveness of Ibuprofen and Aceclofenac in the management of acute pulpitis - A randomized double blind trial                                                                                                                                                         | 2015 | International Journal of Pharmaceutical Sciences Review and Research |
| Cinthura C.; Ganapathy D.; Rajasekar A.                                                                                                                                                  | Analgesic prescription practice for Pulpal pain – an institution-based retrospective study                                                                                                                                                                                         | 2020 | International Journal of Research in Pharmaceutical Sciences         |
| Feigin K.; Bell C.; Shope B.; Henzel S.; Snyder C.                                                                                                                                       | Analysis and Assessment of Pulp Vitality of 102 Intrinsically Stained Teeth in Dogs                                                                                                                                                                                                | 2022 | Journal of Veterinary Dentistry                                      |
| Salas-López E.K.; Casas-Flores S.; López-Lozano N.E.; Layseca-Espinosa E.; García-Sepúlveda C.A.; Niño-Moreno P.C.; Pozos-Guillén A.                                                     | Analysis of bacterial communities of infected primary teeth in a Mexican population                                                                                                                                                                                                | 2020 | Medicina Oral Patología Oral y Cirugía Bucal                         |
| Mashyakhy M.; Abu-Melha A.S.                                                                                                                                                             | Analysis of Bilateral Symmetry of Root Canal Anatomy in Permanent Dentition: An In Vivo CBCT Study in a Saudi Arabian Population                                                                                                                                                   | 2021 | Journal of Contemporary Dental Practice                              |
| Wu XR, Xia B, Ge LH, Qin M, Li RZ, Wang B, Ge FQ, Wang XJ, Chen X, Song GT, Shao LQ, Wang J, Zou J, Lin JJ, Zhao YM, Mei YF, Huang H, Zeng SJ.                                           | Analysis of caries experience and the dental treatments under general anesthesia in 103 cases of children with autism spectrum disorders                                                                                                                                           | 2020 | Zhonghua Kou Qiang Yi Xue Za Zhi                                     |
| Costa V.A., Paixão L.C., Ferreira E.F., Sobrinho A.P.R., Martins R.C.                                                                                                                    | Analysis of dental teleconsulting in the pediatric dentistry field of telehealth minas gerais: A cross-sectional study                                                                                                                                                             | 2021 | Pesquisa Brasileira em Odontopediatria e Clínica Integrada           |
| Ahad M., Pradeep S.                                                                                                                                                                      | Analysis of factors causing extraction of endodontically treated teeth-a retrospective study                                                                                                                                                                                       | 2020 | Indian Journal of Public Health Research and Development             |
| Wang N.-N.; Ge J.-Y.; Xie S.-J.; Chen G.; Zhu M.                                                                                                                                         | Analysis of Mtwo Rotary Instrument Separation During Endodontic Therapy: A Retrospective Clinical Study                                                                                                                                                                            | 2014 | Cell Biochemistry and Biophysics                                     |

|                                                                                                                           |                                                                                                                                                                                                                                             |      |                                                    |
|---------------------------------------------------------------------------------------------------------------------------|---------------------------------------------------------------------------------------------------------------------------------------------------------------------------------------------------------------------------------------------|------|----------------------------------------------------|
| Wang F, Qiao W, Wang F, Meng L.                                                                                           | Analysis of Online Consultations and Emergent Treatments of Operative Dentistry and Endodontics during the COVID-19 Epidemic                                                                                                                | 2022 | Int J Environ Res Public Health                    |
| Yi Q, Liu O, Yan F, Lin X, Diao S, Wang L, Jin L, Wang S, Lu Y, Fan Z.                                                    | Analysis of Senescence-Related Differentiation Potentials and Gene Expression Profiles in Human Dental Pulp Stem Cells                                                                                                                      | 2017 | Cells Tissues Organs                               |
| Chen Y.; Li H.; Li M.; Yang L.; Sun Q.; Chen K.                                                                           | Analysis of survival and factors associated with failure of primary tooth pulpectomies performed under general anaesthesia in children from South China                                                                                     | 2020 | International Journal of Paediatric Dentistry      |
| Shi R.; Yang H.; Lin X.; Cao Y.; Zhang C.; Fan Z.; Hou B.                                                                 | Analysis of the characteristics and expression profiles of coding and noncoding RNAs of human dental pulp stem cells in hypoxic conditions                                                                                                  | 2019 | Stem Cell Research and Therapy                     |
| Yang S.-E.; Jo A.-R.; Lee H.-J.; Kim S.-Y.                                                                                | Analysis of the characteristics of cracked teeth and evaluation of pulp status according to periodontal probing depth                                                                                                                       | 2017 | BMC Oral Health                                    |
| Ke J.; Cai Q.; Zhang C.; Du O.; Wang F.; Luo Y.; Li W.; Ou D.                                                             | Analysis of the Efficacy and Safety of Pulpitis Treated with Different Root Canal Flushing Fluids Based on VAS and Temporomandibular Joint Function                                                                                         | 2022 | Contrast Media and Molecular Imaging               |
| Sharif R.A., Chaturvedi S., Suleman G., Elmahdi A.E., Elagib M.F.A.                                                       | Analysis of tooth extraction causes and patterns                                                                                                                                                                                            | 2020 | Open Access Macedonian Journal of Medical Sciences |
| Krishnamurthy N.H., Jacob C.D., Thimmegowda U., Ramachandra J.A., Arali V., Bhat P.K.                                     | Anatomical configuration of roots and canal morphology of primary mandibular first molars: A CBCT study                                                                                                                                     | 2017 | Journal of Clinical and Diagnostic Research        |
| Argueta-Figueroa L.; Arzate-Sosa G.; Mendieta-Zeron H.                                                                    | Anesthetic efficacy of articaine for inferior alveolar nerve blocks in patients with symptomatic versus asymptomatic irreversible pulpitis                                                                                                  | 2012 | General Dentistry                                  |
| Shakoui S, Ghodrati M, Ghasemi N, Pourlak T, Abdollahi AA.                                                                | Anesthetic efficacy of articaine/epinephrine plus mannitol in comparison with articaine/epinephrine anesthesia for inferior alveolar nerve block in patients with symptomatic irreversible pulpitis: A randomized controlled clinical trial | 2019 | J Dent Res Dent Clin Dent Prospects                |
| Kreimer T.; Kiser II R.; Reader A.; Nusstein J.; Drum M.; Beck M.                                                         | Anesthetic efficacy of combinations of 0.5 mol/L mannitol and lidocaine with epinephrine for inferior alveolar nerve blocks in patients with symptomatic irreversible pulpitis                                                              | 2012 | Journal of Endodontics                             |
| Mohajeri L.; Salehi F.; Mehrvarzfar P.; Arfaee H.; Bohluli B.; Hamedy R.                                                  | Anesthetic efficacy of mepiridine in teeth with symptomatic irreversible pulpitis                                                                                                                                                           | 2015 | Anesthesia Progress                                |
| Bindal P.; Gnanasegaran N.; Bindal U.; Haque N.; Ramasamy T.S.; Chai W.L.; Kasim N.H.A.                                   | Angiogenic effect of platelet-rich concentrates on dental pulp stem cells in inflamed microenvironment                                                                                                                                      | 2019 | Clinical Oral Investigations                       |
| Li W.-J.; Shen J.                                                                                                         | Antagonism of G protein-coupled receptor 55 prevents lipopolysaccharide-induced damages in human dental pulp cells                                                                                                                          | 2022 | Human and Experimental Toxicology                  |
| Lee S.-H.; Baek D.-H.                                                                                                     | Antibacterial and neutralizing effect of human $\beta$ -defensins on enterococcus faecalis and enterococcus faecalis lipoteichoic acid                                                                                                      | 2012 | Journal of Endodontics                             |
| Saatchi M.; Shokrane A.; Navaei H.; Maracy M.R.; Shojaei H.                                                               | Antibacterial effect of calcium hydroxide combined with chlorhexidine on Enterococcus faecalis: A systematic review and meta-analysis                                                                                                       | 2014 | Journal of Applied Oral Science                    |
| Tinoco J.M.; Liss N.; Zhang H.; Nissan R.; Gordon W.; Tinoco E.; Sassone L.; Stevens R.                                   | Antibacterial effect of genetically-engineered bacteriophage $\phi$ Ef11/ $\phi$ FL1C( $\Delta$ 36)PnisA on dentin infected with antibiotic-resistant Enterococcus faecalis                                                                 | 2017 | Archives of Oral Biology                           |
| Shrestha A.; Kishen A.                                                                                                    | Antibacterial efficacy of photosensitizer functionalized biopolymeric nanoparticles in the presence of tissue inhibitors in root canal                                                                                                      | 2014 | Journal of Endodontics                             |
| Valverde M.E.; Baca P.; Ceballos L.; Fuentes M.V.; Ruiz-Linares M.; Ferrer-Luque C.M.                                     | Antibacterial efficacy of several intracanal medicaments for endodontic therapy                                                                                                                                                             | 2017 | Dental Materials Journal                           |
| Soligo L.T.; Lodi E.; Farina A.P.; Souza M.A.; Vidal C.M.P.; Cecchin D.                                                   | Antibacterial efficacy of synthetic and natural-derived novel endodontic irrigant solutions                                                                                                                                                 | 2018 | Brazilian Dental Journal                           |
| Del Carpio-Perochena A.; Kishen A.; Shrestha A.; Bramante C.M.                                                            | Antibacterial Properties Associated with Chitosan Nanoparticle Treatment on Root Dentin and 2 Types of Endodontic Sealers                                                                                                                   | 2015 | Journal of Endodontics                             |
| Yamamoto L.Y.; Loureiro C.; Cintra L.T.A.; Leonardo R.D.T.; Banci H.A.; Ribeiro A.P.F.; Sivieri-Araujo G.; Jacinto R.D.C. | Antibiofilm activity of laser ablation with indocyanine green activated by different power laser parameters compared with photodynamic therapy on root canals infected with Enterococcus faecalis                                           | 2021 | Photodiagnosis and Photodynamic Therapy            |

|                                                                                                                                                                     |                                                                                                                                                                                                         |      |                                                              |
|---------------------------------------------------------------------------------------------------------------------------------------------------------------------|---------------------------------------------------------------------------------------------------------------------------------------------------------------------------------------------------------|------|--------------------------------------------------------------|
| Afrasiabi S.; Pourhajibagher M.; Chiniforush N.; Aminian M.; Bahador A.                                                                                             | Anti-biofilm and anti-metabolic effects of antimicrobial photodynamic therapy using chlorophyllin-phycocyanin mixture against Streptococcus mutans in experimental biofilm caries model on enamel slabs | 2020 | Photodiagnosis and Photodynamic Therapy                      |
| Marra F.; George D.; Chong M.; Sutherland S.; Patrick D.M.                                                                                                          | Antibiotic prescribing by dentists has increased Why?                                                                                                                                                   | 2016 | Journal of the American Dental Association                   |
| Abraham S.B.; Abdulla N.; Himratul-Aznita W.H.; Awad M.; Samaranayake L.P.; Ahmed H.M.A.                                                                            | Antibiotic prescribing practices of dentists for endodontic infections; a cross-sectional study                                                                                                         | 2020 | PLoS ONE                                                     |
| Rôças I.N.; Siqueira J.F.                                                                                                                                           | Antibiotic resistance genes in anaerobic bacteria isolated from primary dental root canal infections                                                                                                    | 2012 | Anaerobe                                                     |
| Relan K., Chandak M., Chandak P., Chandak M., Rath C., Mishra S.                                                                                                    | Antibiotics: A changing scenario in regenerative endodontics                                                                                                                                            | 2020 | International Journal of Research in Pharmaceutical Sciences |
| Yan W.; Yang F.; Liu Z.; Wen Q.; Gao Y.; Niu X.; Zhao Y.                                                                                                            | Anti-Inflammatory and Mineralization Effects of an ASP/PLGA-ASP/ACP/PLLA-PLGA Composite Membrane as a Dental Pulp Capping Agent                                                                         | 2022 | Journal of Functional Biomaterials                           |
| Hong J.-H.; Kim M.-R.; Lee B.-N.; Oh W.-M.; Min K.-S.; Im Y.-G.; Hwang Y.-C.                                                                                        | Anti-inflammatory and mineralization effects of bromelain on lipopolysaccharide-induced inflammation of human dental pulp cells                                                                         | 2021 | Medicina (Lithuania)                                         |
| Metó A, Metó A, Bimbari B, Shytaj K, Özcan M.                                                                                                                       | Anti-Inflammatory and Regenerative Effects of Albanian Propolis in Experimental Vital Amputations                                                                                                       | 2016 | Eur J Prosthodont Restor Dent                                |
| Wang W.; Wang X.; Li L.; Liu Y.                                                                                                                                     | Anti-Inflammatory and Repairing Effects of Mesoporous Silica-Loaded Metronidazole Composite Hydrogel on Human Dental Pulp Cells                                                                         | 2022 | Journal of Healthcare Engineering                            |
| Dennis D.; Abidin T.; Tarigan R.; Zudhistira C.                                                                                                                     | Anti-inflammatory effect of mangosteen rind extract in rabbit teeth with reversible pulpitis (In vivo study)                                                                                            | 2018 | International Journal of Clinical Dentistry                  |
| Horie N.; Hashimoto K.; Hino S.; Kato T.; Shimoyama T.; Kaneko T.; Kusama K.; Sakagami H.                                                                           | Anti-inflammatory potential of rikkosan based on IL-1 $\beta$ network through macrophages to oral tissue cells                                                                                          | 2014 | In Vivo                                                      |
| Nara K.; Kawashima N.; Noda S.; Fujii M.; Hashimoto K.; Tazawa K.; Okiji T.                                                                                         | Anti-inflammatory roles of microRNA 21 in lipopolysaccharide-stimulated human dental pulp cells                                                                                                         | 2019 | Journal of Cellular Physiology                               |
| Pourhajibagher M.; Chiniforush N.; Bahador A.                                                                                                                       | Antimicrobial action of photoactivated C-Phycocyanin against Enterococcus faecalis biofilms: Attenuation of quorum-sensing system                                                                       | 2019 | Photodiagnosis and Photodynamic Therapy                      |
| Long J.; Kreft J.U.; Camilleri J.                                                                                                                                   | Antimicrobial and ultrastructural properties of root canal filling materials exposed to bacterial challenge                                                                                             | 2020 | Journal of Dentistry                                         |
| Jimenez-Gonzalez H.A.; Nakagoshi-Cepeda M.A.A.; Nakagoshi-Cepeda S.E.; Urrutia-Baca V.H.; De La Garza-Ramos M.A.; Solis-Soto J.M.; Gomez-Flores R.; Tamez-Guerra P. | Antimicrobial Effect of Calcium Hydroxide Combined with Electrolyzed Superoxidized Solution at Neutral pH on Enterococcus faecalis Growth                                                               | 2021 | BioMed Research International                                |
| de Miranda R.G.; Gusman H.D.S.; Colombo A.P.V.                                                                                                                      | Antimicrobial efficacy of the EndoVac system plus PDT against intracanal Candida albicans: an ex vivo study                                                                                             | 2015 | Brazilian Oral Research                                      |
| Kiran N.K., Chowdhary N., Sharada Devi Mannur Y., Varghese N.E., Sridhara A., Pavana M.P.                                                                           | Antimicrobial efficacy of triphala as root canal irrigating solution in infected primary teeth: An ex vivo study                                                                                        | 2020 | Indian Journal of Public Health Research and Development     |
| Tavares W.L.F.; Ferreira M.V.L.; de Carvalho Machado V.; Braga T.; Amaral R.R.; Cohen S.                                                                            | Antimicrobial photodynamic therapy and guided endodontics: A case report                                                                                                                                | 2020 | Photodiagnosis and Photodynamic Therapy                      |
| Okamoto C.B.; Motta L.J.; Prates R.A.; da Mota A.C.C.; Gonçalves M.L.L.; Horliana A.C.R.T.; Mesquita Ferrari R.A.; Fernandes K.P.S.; Bussadori S.K.                 | Antimicrobial Photodynamic Therapy as a Co-adjuvant in Endodontic Treatment of Deciduous Teeth: Case Series                                                                                             | 2018 | Photochemistry and Photobiology                              |
| da Silva C.C.; Chaves Júnior S.P.; Pereira G.L.D.; Fontes K.B.F.C.; Antunes L.A.A.; Póvoa H.C.C.; Antunes L.S.; Iorio N.L.P.P.                                      | Antimicrobial Photodynamic Therapy Associated with Conventional Endodontic Treatment: A Clinical and Molecular Microbiological Study                                                                    | 2018 | Photochemistry and Photobiology                              |
| Silva L.A.B.; Novaes Jr. A.B.; De Oliveira R.R.; Nelson-Filho P.; Santamaria Jr. M.; Silva R.A.B.                                                                   | Antimicrobial photodynamic therapy for the treatment of teeth with apical periodontitis: A histopathological evaluation                                                                                 | 2012 | Journal of Endodontics                                       |

|                                                                                                                                                    |                                                                                                                                                                             |      |                                                                   |
|----------------------------------------------------------------------------------------------------------------------------------------------------|-----------------------------------------------------------------------------------------------------------------------------------------------------------------------------|------|-------------------------------------------------------------------|
| Fernandes M.L.D.M.F.; Maia C.A.; Santos A.M.C.; Vilela C.R.; Araujo F.R.; Mohallen M.L.; Silveira L.B.; Fernandes A.M.                             | Antimicrobial photodynamic therapy in the endodontic treatment of deciduous teeth: In vivo pilot study                                                                      | 2020 | Pesquisa Brasileira em Odontopediatria e Clínica Integrada        |
| Lins RX, de Oliveira Andrade A, Hirata Junior R, Wilson MJ, Lewis MA, Williams DW, Fidel RA.                                                       | Antimicrobial resistance and virulence traits of Enterococcus faecalis from primary endodontic infections                                                                   | 2013 | J Dent                                                            |
| Micallef S.; Azzopardi C.M.                                                                                                                        | Antiphospholipid syndrome masquerading as a case of infective endocarditis                                                                                                  | 2018 | BMJ Case Reports                                                  |
| Costa T., Ferreira E., Antunes L., Dinis P.B.                                                                                                      | Antral Bony Wall Erosion, Trigeminal Nerve Injury, and Enophthalmos after Root Canal Surgery                                                                                | 2016 | Allergy and Rhinology                                             |
| Quiñones Pedraza J.A., Flores Treviño J.J., Cruz Fierro N., González Meléndez R., Elizondo Elizondo J., Zavala Vargas L.A., De La Rosa Moreno D.A. | Apexification in a mandibular first molar with a middle mesial canal                                                                                                        | 2018 | Clinical Case Reports                                             |
| Paulo A.O.; Tanomaru-Filho M.; Leonardo R.T.; Chávez-Andrade G.M.; Guerreiro-Tanomaru J.M.                                                         | Apexification with white MTA in an immature permanent tooth with dens invaginatus                                                                                           | 2013 | Brazilian Journal of Oral Sciences                                |
| Shalan L.A., Al-Huwaizi H.F., Fatalla A.A.                                                                                                         | Apical Extrusion of Debris and Irrigants after using Different Irrigation Needles and Systems with Different Depth of Penetration: (A Comparative Study)                    | 2018 | Biomedical and Pharmacology Journal                               |
| Sağlam B.C.; Çiçek E.; Koçak M.M.; Koçak S.; Kıvanç B.H.                                                                                           | Apical transportation during removal of root canal filling with different retreatment systems                                                                               | 2016 | International Journal of Artificial Organs                        |
| Hatice BD, Nihal A, Nursel A, Humeyra Ozge Y, Goksuluk D.                                                                                          | Applicability of Cameriere's and Drusini's age estimation methods to a sample of Turkish adults                                                                             | 2017 | Dentomaxillofac Radiol                                            |
| Wei Y., Wang J., Dai D., Wang H., Zhang M., Zhang Z., Zhou X., He L., Cheng L.                                                                     | Application of a Caries Treatment Difficulty Assessment System in Dental Caries Management                                                                                  | 2022 | International Journal of Environmental Research and Public Health |
| Zhang F.; Wu S.; Qu M.; Zhou L.                                                                                                                    | Application of a Remotely Controlled Artificial Intelligence Analgesic Pump Device in Painless Treatment of Children                                                        | 2022 | Contrast Media and Molecular Imaging                              |
| Chakka L.R.J.; Vislislis J.; Vidal C.M.P.; Biz M.T.; K. Salem A.; Cavalcanti B.N.                                                                  | Application of BMP-2/FGF-2 gene-activated scaffolds for dental pulp capping                                                                                                 | 2020 | Clinical Oral Investigations                                      |
| Vineet A., Nimisha S.                                                                                                                              | Application of caries assessment spectrum and treatment instrument for staging and evaluating treatment needs of an adult population-A hospital based cross-sectional study | 2021 | African Health Sciences                                           |
| Handa K.; Koike T.; Hayashi K.; Saito T.                                                                                                           | Application of high-frequency radio waves to direct pulp capping                                                                                                            | 2013 | Journal of Endodontics                                            |
| Erbudak HÖ, Ozbek M, Uysal S, Karabulut E.                                                                                                         | Application of Kvaal et al.'s age estimation method to panoramic radiographs from Turkish individuals                                                                       | 2012 | Forensic Sci Int                                                  |
| Davoudi A.; Sanei M.; Badrian H.                                                                                                                   | Application of laser irradiation for restorative treatments                                                                                                                 | 2016 | Open Dentistry Journal                                            |
| Kondo H.; Tobita T.; Ueno T.; Yoshimura H.; Katase N.; Ohba S.; Nagatsuka H.; Sano K.                                                              | Application of multiplanar computed tomography and the osirix imaging software for precise analysis of dens invaginatus in the maxillary third molar                        | 2012 | Journal of Hard Tissue Biology                                    |
| Ding J, Ebihara A, Watanabe S, Iino Y, Kokuzawa C, Anjo T, Suda H, Sumi Y.                                                                         | Application of optical coherence tomography to identify pulp exposure during access cavity preparation using an Er:YAG laser                                                | 2014 | Photomed Laser Surg                                               |
| Xi X.; Liu L.; Chen W.; Han G.                                                                                                                     | Application of platelet-rich plasma in regenerated pulp treatment of young permanent teeth: An animal study                                                                 | 2020 | Indian Journal of Pharmaceutical Sciences                         |
| Ran L., Zhao N., Fan L., Zhou P., Zhang C., Yu C.                                                                                                  | Application of virtual reality on non-drug behavioral management of short-term dental procedure in children                                                                 | 2021 | Trials                                                            |
| Shetty C., Shetty A., Shetty S., Kaur G., Hegde M.N., Nidhi L.                                                                                     | Applications of chitosan in dentistry                                                                                                                                       | 2020 | Indian Journal of Public Health Research and Development          |
| Shobhana R., Karthick A., Mitthra S., Anuradha B.                                                                                                  | Applications of laser in the field of endodontics: An update                                                                                                                | 2020 | European Journal of Molecular and Clinical Medicine               |
| Najeeb S, Khurshid Z, Zafar MS, Ajlal S.                                                                                                           | Applications of Light Amplification by Stimulated Emission of Radiation (Lasers) for Restorative Dentistry                                                                  | 2016 | Med Princ Pract                                                   |
| Aldhilan S.; Ali S.A.-H.                                                                                                                           | Approaches used to care for carious primary molars among pediatric dentists and general dental practitioners in Saudi Arabia                                                | 2018 | Journal of Clinical and Experimental Dentistry                    |
| Waterhouse P.                                                                                                                                      | Are different pulp treatment techniques and associated medicaments effective for the treatment of extensive decay in primary teeth?                                         | 2021 | Evid Based Dent                                                   |

|                                                                                                                                    |                                                                                                                                                                                                  |      |                                                                |
|------------------------------------------------------------------------------------------------------------------------------------|--------------------------------------------------------------------------------------------------------------------------------------------------------------------------------------------------|------|----------------------------------------------------------------|
| Lu P.-C.; Wu J.-H.; Chen C.-M.; Du J.-K.                                                                                           | Arsenic trioxide-induced mandibular osteomyelitis                                                                                                                                                | 2015 | Journal of Oral and Maxillofacial Surgery                      |
| Pereira L.A.P.; Groppo F.C.; Bergamaschi C.D.C.; Meechan J.G.; Ramacciato J.C.; Motta R.H.L.; Ranali J.                            | Articaine (4%) with epinephrine (1:100,000 or 1:200,000) in intraosseous injections in symptomatic irreversible pulpitis of mandibular molars: Anesthetic efficacy and cardiovascular effects    | 2013 | Oral Surgery, Oral Medicine, Oral Pathology and Oral Radiology |
| Zheng L, Wang H, Mei L, Chen Q, Zhang Y, Zhang H.                                                                                  | Artificial intelligence in digital cariology: a new tool for the diagnosis of deep caries and pulpitis using convolutional neural networks                                                       | 2021 | Ann Transl Med                                                 |
| Bei Y.; Tianqian H.; Fanyuan Y.; Haiyun L.; Xueyang L.; Jing Y.; Chenglin W.; Ling Y.                                              | ASH1L Suppresses Matrix Metalloproteinase through Mitogen-activated Protein Kinase Signaling Pathway in Pulpitis                                                                                 | 2017 | Journal of Endodontics                                         |
| Cantekin K, Yildirim MD, Cantekin I.                                                                                               | Assessing change in quality of life and dental anxiety in young children following dental rehabilitation under general anesthesia                                                                | 2014 | Pediatr Dent                                                   |
| Mishra S.; Sharma D.S.; Bhusari C.                                                                                                 | Assessing inflammatory status of pulp in irreversible pulpitis cases with pulse oximeter and dental hemogram                                                                                     | 2019 | Journal of Clinical Pediatric Dentistry                        |
| Gudipani RK, Alkuwaykibi AS, Ganji KK, Bandela V, Karobari MI, Hsiao CY, Kulkarni S, Thambar S.                                    | Assessment of caries diagnostic thresholds of DMFT, ICDAS II and CAST in the estimation of caries prevalence rate in first permanent molars in early permanent dentition-a cross-sectional study | 2022 | BMC Oral Health                                                |
| Parthasarathy P., Dharman S.                                                                                                       | Assessment of dental patterns in digital panoramic radiographs-an aid in personal identification                                                                                                 | 2020 | International Journal of Pharmaceutical Research               |
| Almasri M.                                                                                                                         | Assessment of extracting molars and premolars after root canal treatment: A retrospective study                                                                                                  | 2019 | Saudi Dental Journal                                           |
| Taha N.A., Ahmad M.B., Ghanim A.                                                                                                   | Assessment of Mineral Trioxide Aggregate pulpotomy in mature permanent teeth with carious exposures                                                                                              | 2017 | International endodontic journal                               |
| Kritikou K.; Imre M.; Tanase M.; Vinereanu A.; Totan A.R.; Spinu T.-C.; Miricescu D.; Stanescu-Spinu I.-I.; Bordea M.; Greabu M.   | Assessment of Mineralization, Oxidative Stress, and Inflammation Mechanisms in the Pulp of Primary Teeth                                                                                         | 2022 | Applied Sciences (Switzerland)                                 |
| Reis T.D.C.; Bortolotti F.; Innocentini L.M.A.R.; Ferrari T.C.; Ricz H.M.A.; Cunha R.L.G.; Costa T.C.D.M.; Macedo L.D.D.           | Assessment of oral health condition in recipients of allogeneic hematopoietic cell transplantation                                                                                               | 2022 | Hematology, Transfusion and Cell Therapy                       |
| Assiri K.I., Sandeepa N.C., Asiri R.S., Mulawi S.A., Najmi S.M., Srivastava K.C.                                                   | Assessment of Oral-Systemic Disease Association amongst Dental Patients: A Retrospective Panoramic Radiographic Study                                                                            | 2020 | The journal of contemporary dental practice                    |
| Abdelwahed A., Roshdy N.N.                                                                                                         | Assessment of Post-operative Pain after using EdgeFile X7 and Protaper Next Rotary Systems in Patients with Symptomatic Pulpitis in Mandibular Molars: A Randomized Controlled Clinical Trial    | 2022 | Open Access Macedonian Journal of Medical Sciences             |
| Anusha B.; Madhusudhana K.; Chinni S.K.; Paramesh Y.                                                                               | Assessment of pulp oxygen saturation levels by pulse oximetry for pulpal diseases -a diagnostic study                                                                                            | 2017 | Journal of Clinical and Diagnostic Research                    |
| Iohara K.; Fujita M.; Arijii Y.; Yoshikawa M.; Watanabe H.; Takashima A.; Nakashima M.                                             | Assessment of pulp regeneration induced by stem cell therapy by magnetic resonance imaging                                                                                                       | 2016 | Journal of Endodontics                                         |
| Mittal N.; Baranwal H.C.; Kumar P.; Gupta S.                                                                                       | Assessment of pulp sensibility in the mature necrotic teeth using regenerative endodontic therapy with various scaffolds - Randomised clinical trial                                             | 2021 | Indian Journal of Dental Research                              |
| Ignă A.; Ignă C.; Miron M.I.; Schuszler L.; Dascălu R.; Moldovan M.; Voicu A.A.; Todea C.D.; Boariu M.; Mărtu M.-A.; Stratul Ș.-I. | Assessment of Pulpal Status in Primary Teeth Following Direct Pulp Capping in an Experimental Canine Model                                                                                       | 2022 | Diagnostics                                                    |
| Abdullah M.M., Mohsen C.                                                                                                           | Assessment of Retention and Marginal Accuracy Of Endocrown Retained Fixed Partial Dentures                                                                                                       | 2022 | NeuroQuantology                                                |
| Janani K.; Teja K.V.; Ajitha P.; Sandhya R.                                                                                        | Assessment of sCD14 levels in patients with endodontic pathology requiring root canal treatment; Avaliação dos níveis de sCD14 em pacientes que necessitam de tratamento endodôntico             | 2022 | Brazilian Dental Science                                       |
| Nino-Barrera JL, Ardila E, Guaman-Pacheco F, Gamboa-Martinez L, Alzate-Mendoza D.                                                  | Assessment of the relationship between the maxillary sinus floor and the upper posterior root tips: Clinical considerations                                                                      | 2018 | J Investig Clin Dent                                           |

|                                                                                                         |                                                                                                                                                                                    |      |                                                     |
|---------------------------------------------------------------------------------------------------------|------------------------------------------------------------------------------------------------------------------------------------------------------------------------------------|------|-----------------------------------------------------|
| Meghana Reddy J., Gurunathan D., Rajendran D.                                                           | Assessment of working length of root canal in mandibular first primary molar in children aged between 2 to 6 years                                                                 | 2020 | Indian Journal of Forensic Medicine and Toxicology  |
| Bekes K, Steuber A, Challakh N, Schmidt J, Haak R, Hráský V, Ziebolz D.                                 | Associated factors to caries experience of children undergoing general anaesthesia and treatment needs characteristics over a 10 year period                                       | 2020 | BMC Oral Health                                     |
| Prado IA, Costa CM, Costa SA, Carmo CDS, Thomaz EBAF, Souza SFC, Ribeiro CCC.                           | Association Between Anaemia and Dental Caries in Brazilian Adolescents                                                                                                             | 2020 | Oral Health Prev Dent                               |
| Sharma R.; Kumar V.; Logani A.; Chawla A.; Mir R.A.; Sharma S.; Kalaivani M.                            | Association between concentration of active MMP-9 in pulpal blood and pulpotomy outcome in permanent mature teeth with irreversible pulpitis – a preliminary study                 | 2021 | International Endodontic Journal                    |
| Kuligowski P., Jaroń A., Preuss O., Gabrysz-Trybek E., Bładowska J., Trybek G.                          | Association between odontogenic and maxillary sinus conditions: A retrospective cone-beam computed tomographic study                                                               | 2021 | Journal of Clinical Medicine                        |
| Vitali FC, Cardoso IV, Mello FW, Flores-Mir C, Andrada AC, Dutra-Horstmann KL, Duque TM.                | Association between Orthodontic Force and Dental Pulp Changes: A Systematic Review of Clinical and Radiographic Outcomes                                                           | 2022 | J Endod                                             |
| Nissrin B, Basma R, Majid S.                                                                            | Association between Periodontitis and Pulp Calcifications: Radiological Study                                                                                                      | 2022 | Int J Dent                                          |
| Franciscatto G.J.; Brennan D.S.; Gomes M.S.; Rossi-Fedele G.                                            | Association between pulp and periapical conditions and dental emergency visits involving pain relief: epidemiological profile and risk indicators in private practice in Australia | 2020 | International Endodontic Journal                    |
| Neves ÉTB, Perazzo MF, Gomes MC, Ribeiro ILA, Paiva SM, Granville-Garcia AF.                            | Association between sense of coherence and untreated dental caries in preschoolers: a cross-sectional study                                                                        | 2019 | Int Dent J                                          |
| Kawamura K, Doi T, Kano K, Matsui M, Hattori Y, Onishi F, Fukata H, Miyake T.                           | Association between smoking habits and dental care utilization and cost using administrative claims database and specific medical check-up data                                    | 2022 | BMC Oral Health                                     |
| Gaêta-Araújo H, Fontenele RC, Nascimento EHL, Nascimento MDCC, Freitas DQ, de Oliveira-Santos C.        | Association between the Root Canal Configuration, Endodontic Treatment Technical Errors, and Periapical Hypodensities in Molar Teeth: A Cone-beam Computed Tomographic Study       | 2019 | J Endod                                             |
| Santhanam P., Sharma S., Sandhya R.                                                                     | Association of age and gender distribution in patient having class III/ class IV caries resulting in root canal treatment in upper and lower anteriors                             | 2020 | European Journal of Molecular and Clinical Medicine |
| Ashwin Kumar S.P., Sugumaran S., Dharman S.                                                             | Association of age and gender in patients with class v caries indicated for root canal treatment in the age group 60-80 years                                                      | 2020 | International Journal of Pharmaceutical Research    |
| Rajawat A.; Majeti C.; Podugu U.; Kaushik M.; Nagamaheshwari X.; Mehra N.                               | Association of hormonal fingerprints and dental caries: A pilot study                                                                                                              | 2020 | Journal of Conservative Dentistry                   |
| Shivanni S.S.; Anjaneyulu K.; Balakrishna R.N.                                                          | Association of irreversible pulpitis and single visit root canal treatment                                                                                                         | 2020 | International Journal of Dentistry and Oral Science |
| An G.K., Morse D.E., Kunin M., Goldberger R.S., Psoter W.J.                                             | Association of Radiographically Diagnosed Apical Periodontitis and Cardiovascular Disease: A Hospital Records-based Study                                                          | 2016 | Journal of endodontics                              |
| Maqbool M, Noorani TY, Samsudin NA, Awang Nawi MA, Rossi-Fedele G, Karobari MI, Messina P, Scardina GA. | Association of Vital Pulp Therapy Outcomes with Tooth Type, Arch Location, Treatment Type, and Number of Surfaces Destroyed in Deciduous Teeth: A Retrospective Study              | 2021 | Int J Environ Res Public Health                     |
| Erdogan O.; Malek M.; Gibbs J.L.                                                                        | Associations between Pain Severity, Clinical Findings, and Endodontic Disease: A Cross-Sectional Study                                                                             | 2021 | Journal of Endodontics                              |
| Wu H.; He M.; Yang R.; Zuo Y.; Bian Z.                                                                  | Astrocyte elevated gene-1 participates in the production of pro-inflammatory cytokines in dental pulp cells via NF-κB signalling pathway                                           | 2018 | International Endodontic Journal                    |
| Ren H.; Wen Q.; Zhao Q.; Wang N.; Zhao Y.                                                               | Atlas of human dental pulp cells at multiple spatial and temporal levels based on single-cell sequencing analysis                                                                  | 2022 | Frontiers in Physiology                             |
| Leal S, Bonifacio C, Raggio D, Frencken J.                                                              | Atraumatic Restorative Treatment: Restorative Component                                                                                                                            | 2018 | Monogr Oral Sci                                     |

|                                                                                                                                                                                                                                                                      |                                                                                                                                  |      |                                                                   |
|----------------------------------------------------------------------------------------------------------------------------------------------------------------------------------------------------------------------------------------------------------------------|----------------------------------------------------------------------------------------------------------------------------------|------|-------------------------------------------------------------------|
| Shashmurina V.R., Nikolaev A.I., Vasiltsova O.A., Dmitriev M.V., Gladarevskaya E.I., Shashmurina A.B., Tyurin S.M.                                                                                                                                                   | Attitude to antibiotic therapy in dentists conducting therapeutic treatment of patients                                          | 2022 | Kliniceskaa Mikrobiologia i Antimikrobnaa Himioterapia            |
| Schwendicke F, Meyer-Lueckel H, Dörfer C, Paris S.                                                                                                                                                                                                                   | Attitudes and behaviour regarding deep dentin caries removal: a survey among German dentists                                     | 2013 | Caries Res                                                        |
| Khaloufi O.; Khalaf L.H.; Akerzoul N.; Hassani F.Z.I.M.; Toure B.                                                                                                                                                                                                    | Attitudes of dental practitioners from Northern Morocco on the prescription of antibiotics during endodontic treatment: A survey | 2022 | Saudi Endodontic Journal                                          |
| Huang Y.; Tang X.; Cehreli Z.C.; Dai X.; Xu J.; Zhu H.                                                                                                                                                                                                               | Autologous transplantation of deciduous tooth pulp into necrotic young permanent teeth for pulp regeneration in a dog model      | 2019 | Journal of International Medical Research                         |
| Srinisha M.; Ramakrishnan M.                                                                                                                                                                                                                                         | Average time in between appointments for multivisit pulpectomy in patients reported to a university dental hospital              | 2022 | Journal of Advanced Pharmaceutical Technology and Research        |
| Yuvraj S., Ganapathy D.                                                                                                                                                                                                                                              | Awareness about primary teeth and their care among general dentists a survey                                                     | 2020 | International Journal of Research in Pharmaceutical Sciences      |
| Chandukutty D., Peedikayil F.C., Premkumar C.T., Narasimhan D., Jose D.                                                                                                                                                                                              | Awareness of dental trauma management among school teachers of Kannur, Kerala, India                                             | 2017 | Journal of Clinical and Diagnostic Research                       |
| Azima Hanin S.M.; Muralidoss H.                                                                                                                                                                                                                                      | Awareness of hot tooth and its management: A questionnaire survey                                                                | 2021 | International Journal of Dentistry and Oral Science               |
| Pooja Umaiyal. M.                                                                                                                                                                                                                                                    | Awareness of root canal treatment among people                                                                                   | 2016 | Research Journal of Pharmacy and Technology                       |
| Endo M.S.; Cardoso E.R.; Pavan N.N.O.; de Moraes C.A.H.; Martinho F.C.                                                                                                                                                                                               | Bacterial diversity in primary and secondary/persistent endodontic infections by Checkerboard DNA-DNA Hybridization technique    | 2017 | Dental Press Endodontics                                          |
| Beltrame A.P.; Bolan M.; Serratine A.C.; Rocha M.J.                                                                                                                                                                                                                  | Bacterial intensity and localization in primary molars with caries disease                                                       | 2012 | Journal of Indian Society of Pedodontics and Preventive Dentistry |
| Ricucci D, Siqueira JF Jr, Abdelsayed RA, Lio SG, Rôças IN.                                                                                                                                                                                                          | Bacterial Invasion of Pulp Blood Vessels in Teeth with Symptomatic Irreversible Pulpitis                                         | 2021 | J Endod                                                           |
| Afkhami F.; Nasri S.; Valizadeh S.                                                                                                                                                                                                                                   | Bacterial leakage assessment in root canals sealed with AH Plus sealer modified with silver nanoparticles                        | 2021 | BMC Oral Health                                                   |
| Snigdha N.T., Kamarudin A.                                                                                                                                                                                                                                           | BACTERIAL LEAKAGE OF BIOCERAMICS PULP DRESSING MATERIALS: A REVIEW OF LITERATURE                                                 | 2022 | Journal of Pharmaceutical Negative Results                        |
| Caneppele T.M.F.; de Souza L.G.; Spinola M.S.; de Oliveira F.E.; de Oliveira L.D.; Carvalho C.A.T.; Bresciani E.                                                                                                                                                     | Bacterial levels and amount of endotoxins in carious dentin within reversible pulpitis scenarios                                 | 2021 | Clinical Oral Investigations                                      |
| Dai S.; Xiao G.; Dong N.; Liu F.; He S.; Guo Q.                                                                                                                                                                                                                      | Bactericidal effect of a diode laser on Enterococcus faecalis in human primary teeth-an in vitro study                           | 2018 | BMC Oral Health                                                   |
| Osman A.; Gnanasegaran N.; Govindasamy V.; Kathivaloo P.; Wen A.S.; Musa S.; Abu Kasim N.H.                                                                                                                                                                          | Basal expression of growth-factor-associated genes in periodontal ligament stem cells reveals multiple distinctive pathways      | 2014 | International Endodontic Journal                                  |
| Kwon Y.S.; Lee S.H.; Hwang Y.C.; Rosa V.; Lee K.W.; Min K.S.                                                                                                                                                                                                         | Behaviour of human dental pulp cells cultured in a collagen hydrogel scaffold cross-linked with cinnamaldehyde                   | 2017 | International Endodontic Journal                                  |
| Song J.; Wu Q.; Jiang J.; Sun D.; Wang F.; Xin B.; Cui Q.                                                                                                                                                                                                            | Berberine reduces inflammation of human dental pulp fibroblast via miR-21/KBTBD7 axis                                            | 2020 | Archives of Oral Biology                                          |
| Duggal M, Gizani S, Albadri S, Krämer N, Stratigaki E, Tong HJ, Seremidi K, Kloukos D, BaniHani A, Santamaria RM, Hu S, Maden M, Amend S, Boutsiouki C, Bekes K, Lygidakis N, Frankenberger R, Monteiro J, Anttonen V, Leith R, Sobczak M, Rajasekharan S, Parekh S. | Best clinical practice guidance for treating deep carious lesions in primary teeth: an EAPD policy document                      | 2022 | Eur Arch Paediatr Dent                                            |
| Paglia L.                                                                                                                                                                                                                                                            | Bibliometrics to improve our patients' care!                                                                                     | 2022 | Eur J Paediatr Dent                                               |
| Li J., Li Y., Xie J., Geng W., Gao X., Wang N., Zhang Y.                                                                                                                                                                                                             | Bilateral mandibular second molar impaction with paradental cyst: A case report and literature review                            | 2017 | Journal of Jilin University Medicine Edition                      |

|                                                                                                                                                     |                                                                                                                                                                                    |      |                                                                   |
|-----------------------------------------------------------------------------------------------------------------------------------------------------|------------------------------------------------------------------------------------------------------------------------------------------------------------------------------------|------|-------------------------------------------------------------------|
| Simila H.O.; Karpukhina N.; Hill R.G.                                                                                                               | Bioactivity and fluoride release of strontium and fluoride modified Biodentine                                                                                                     | 2018 | Dental Materials                                                  |
| Koch K.A.; Brave D.G.                                                                                                                               | Bioceramics, part I: the clinician's viewpoint.                                                                                                                                    | 2012 | Dentistry today                                                   |
| Masthan K.M.K.; Aravindha Babu N.; Bhattacharjee T.; Elumalai Dr. M.                                                                                | Biochemical markers - A tool to detect oral diseases                                                                                                                               | 2013 | International Journal of Pharma and Bio Sciences                  |
| Guerrero-Gironés J.; Alcaina-Lorente A.; Ortiz-Ruiz C.; Ortiz-Ruiz E.; Pecci-Lloret M.P.; Ortiz-Ruiz A.J.; Rodríguez-Lozano F.J.; Pecci-Lloret M.R. | Biocompatibility of a ha/β-tcp/c scaffold as a pulp-capping agent for vital pulp treatment: An in vivo study in rat molars                                                         | 2021 | International Journal of Environmental Research and Public Health |
| Alsubait S, Aljarbou F.                                                                                                                             | Biodentine or Mineral Trioxide Aggregate as Direct Pulp Capping Material in Mature Permanent Teeth with Carious Exposure? A Systematic Review and Meta-analysis                    | 2021 | Oper Dent                                                         |
| Soni H.K.                                                                                                                                           | Biodentine pulpotomy in mature permanent molar: A case report                                                                                                                      | 2016 | Journal of Clinical and Diagnostic Research                       |
| El Karim I.A., McCrudden M.T., McGahon M.K., Curtis T.M., Jeanneau C., Giraud T., Irwin C.R., Linden G.J., Lundy F.T., About I.                     | Biodentine Reduces Tumor Necrosis Factor Alpha-induced TRPA1 Expression in Odontoblastlike Cells                                                                                   | 2016 | Journal of endodontics                                            |
| Shayegan A.; Jurysta C.; Atash R.; Petein M.; Abbeele A.V.                                                                                          | Biodentine used as a pulp-capping agent in primary pig teeth                                                                                                                       | 2012 | Pediatric Dentistry                                               |
| Chinadet W, Sutharaphan T, Chompu-Inwai P.                                                                                                          | Biodentine™ Partial Pulpotomy of a Young Permanent Molar with Signs and Symptoms Indicative of Irreversible Pulpitis and Periapical Lesion: A Case Report of a Five-Year Follow-Up | 2019 | Case Rep Dent                                                     |
| Nasrallah H.; Noueiri B.E.                                                                                                                          | Biodentine™ Pulpotomy in Stage I Primary Molars: A 12-month Follow-up                                                                                                              | 2022 | International Journal of Clinical Pediatric Dentistry             |
| Kale Y.; Yadav S.; Dadpe M.; Dahake P.; Kendre S.                                                                                                   | Bioinductive and anti-inflammatory properties of Propolis and Biodentine on SHED                                                                                                   | 2022 | Saudi Dental Journal                                              |
| Manhas M.; Mittal S.; Sharma A.; Gupta K.; Pathania V.; Thakur V.                                                                                   | Biological approach in repair of partially inflamed dental pulp using second-generation platelet-rich fibrin and mineral trioxide aggregate as a pulp medicament in primary molars | 2019 | Journal of Indian Society of Pedodontics and Preventive Dentistry |
| Ziauddin S.M.; Nakashima M.; Watanabe H.; Tominaga M.; Iohara K.                                                                                    | Biological characteristics and pulp regeneration potential of stem cells from canine deciduous teeth compared with those of permanent teeth                                        | 2022 | Stem Cell Research and Therapy                                    |
| Ma L.; Li M.-W.; Bai Y.; Guo H.-H.; Wang S.-C.; Yu Q.                                                                                               | Biological characteristics of fluorescent superparamagnetic iron oxide labeled human dental pulp stem cells                                                                        | 2017 | Stem Cells International                                          |
| Paschalidou M.; Athanasiadou E.; Arapostathis K.; Kotsanos N.; Koidis P.T.; Bakopoulou A.; Theocharidou A.                                          | Biological effects of low-level laser irradiation (LLLI) on stem cells from human exfoliated deciduous teeth (SHED)                                                                | 2020 | Clinical Oral Investigations                                      |
| Lee M.; Kang C.-M.; Song J.S.; Shin Y.S.; Kim S.Y.; Kim S.-O.; Choi H.-J.                                                                           | Biological efficacy of two mineral trioxide aggregate (Mta)-based materials in a canine model of pulpotomy                                                                         | 2017 | Dental Materials Journal                                          |
| Oliveira L.V.; de Souza G.L.; da Silva G.R.; Magalhães T.E.A.; Freitas G.A.N.; Turriani A.P.; de Rezende Barbosa G.L.; Moura C.C.G.                 | Biological parameters, discolouration and radiopacity of calcium silicate-based materials in a simulated model of partial pulpotomy                                                | 2021 | International Endodontic Journal                                  |
| Zhu N., Chatzistavrou X., Ge L., Qin M., Papagerakis P., Wang Y.                                                                                    | Biological properties of modified bioactive glass on dental pulp cells                                                                                                             | 2019 | Journal of dentistry                                              |
| Rodrigues N.S.; França C.M.; Tahayeri A.; Ren Z.; Saboia V.P.A.; Smith A.J.; Ferracane J.L.; Koo H.; Bertassoni L.E.                                | Biomaterial and Biofilm Interactions with the Pulp-Dentin Complex-on-a-Chip                                                                                                        | 2021 | Journal of Dental Research                                        |
| Wang X., Zhang Y., Li X., Huang Z., Cui M., Huang Z., Zhang X., Hu X.                                                                               | Biometric analysis of apical surgery-related anatomy of mandibular first molars: a cone-beam computed tomography study in a Mongoloid population                                   | 2019 | Journal of International Medical Research                         |
| Chen Z, Cao S, Wang H, Li Y, Kishen A, Deng X, Yang X, Wang Y, Cong C, Wang H, Zhang X.                                                             | Biomimetic remineralization of demineralized dentine using scaffold of CMC/ACP nanocomplexes in an in vitro tooth model of deep caries                                             | 2015 | PLoS One                                                          |
| Rodríguez-Lozano F.J.; Lozano A.; López-García S.; García-Bernal D.; Sanz J.L.; Guerrero-Gironés J.; Llana C.; Forner L.; Melo M.                   | Biomimetic remineralization potential and biological properties of a new tantalum oxide (Ta2O5)-containing calcium silicate cement                                                 | 2022 | Clinical Oral Investigations                                      |
| Kobayashi K., Koyama N., Nagano Y., Usami I., Fujimura K., Heike T.                                                                                 | Biopsychosocial assessment of dental neglect in a pediatric cancer patient from the perspectives of developmental trauma disorder                                                  | 2022 | Pediatric Dental Journal                                          |



|                                                                                                                                                                      |                                                                                                                                                              |      |                                                  |
|----------------------------------------------------------------------------------------------------------------------------------------------------------------------|--------------------------------------------------------------------------------------------------------------------------------------------------------------|------|--------------------------------------------------|
| Assiry A.                                                                                                                                                            | Bi-rooted primary maxillary canines: A case report                                                                                                           | 2019 | Journal of Medical Case Reports                  |
| Shmueli A, Guelmann M, Tickotsky N, Ninio-Harush R, Noy AF, Moskovitz M.                                                                                             | Blood Gas Tension and Acidity Level of Caries Exposed Vital Pulp in Primary Molars                                                                           | 2020 | J Clin Pediatr Dent                              |
| Huang J.I.-S.; Chang H.-H.; Liao W.-C.; Lin C.-P.; Kao C.-T.; Huang T.-H.                                                                                            | Blood pressure reduction in patients with irreversible pulpitis teeth treated by non-surgical root canal treatment                                           | 2017 | Journal of Dental Sciences                       |
| Mohamad S.A.; Milward M.R.; Hadis M.A.; Kuehne S.A.; Cooper P.R.                                                                                                     | Blue light photobiomodulation of dental pulp cells                                                                                                           | 2022 | Lasers in Dental Science                         |
| Lopes G.C.; Ballarin A.; Baratieri L.N.                                                                                                                              | Bond strength and fracture analysis between resin cements and root canal dentin                                                                              | 2012 | Australian Endodontic Journal                    |
| Dell'Olio F., Lorusso P., Barile G., Favia G.                                                                                                                        | Brugada Syndrome Updated Risk Assessment and Perioperative Management in Oral Surgery: A Case Series                                                         | 2021 | Journal of Oral and Maxillofacial Surgery        |
| Bilgin M.S.; Erdem A.; Tanriver M.                                                                                                                                   | CAD/CAM endocrown fabrication from a polymer-infiltrated ceramic network block for primary molar: A case report                                              | 2016 | Journal of Clinical Pediatric Dentistry          |
| Kuramoto H.; Hirao K.; Yumoto H.; Hosokawa Y.; Nakanishi T.; Takegawa D.; Washio A.; Kitamura C.; Matsuo T.                                                          | Caffeic Acid Phenethyl Ester (CAPE) Induces VEGF Expression and Production in Rat Odontoblastic Cells                                                        | 2019 | BioMed Research International                    |
| Kuramoto H.; Nakanishi T.; Takegawa D.; Mieda K.; Hosaka K.                                                                                                          | Caffeic Acid Phenethyl Ester Induces Vascular Endothelial Growth Factor Production and Inhibits CXCL10 Production in Human Dental Pulp Cells                 | 2022 | Current issues in molecular biology              |
| Tavassoli-Hojjati S.; Kameli S.; Rahimian-Emam S.; Ahmadyar M.; Asgary S.                                                                                            | Calcium enriched mixture cement for primary molars exhibiting root perforations and extensive root resorption: report of three cases                         | 2014 | Pediatric dentistry                              |
| Prasetyo E.P.; Kuntjoro M.; Goenhartho S.; Juniarti D.E.; Cahyani F.; Hendrijantini N.; Nugraha A.P.; Hariyani N.; Rantam F.A.                                       | Calcium hydroxide increases human umbilical cord mesenchymal stem cells expressions of apoptotic protease-activating factor-1, caspase-3 and caspase-9       | 2021 | Clinical, Cosmetic and Investigational Dentistry |
| ElSebaai A, Wahba AH, Grawish ME, Elkalla IH.                                                                                                                        | Calcium Hydroxide Paste, Mineral Trioxide Aggregate, and Formocresol as Direct Pulp Capping Agents in Primary Molars: A Randomized Controlled Clinical Trial | 2022 | Pediatr Dent                                     |
| Schwendicke F., Brouwer F., Stolpe M.                                                                                                                                | Calcium Hydroxide versus Mineral Trioxide Aggregate for Direct Pulp Capping: A Cost-effectiveness Analysis                                                   | 2015 | Journal of endodontics                           |
| Huang H.; Luo L.; Li L.; Guan Y.; Yan Y.; Jiang Z.; Jiang B.                                                                                                         | Calcium Phosphate Cement Promotes Odontoblastic Differentiation of Dental Pulp Cells In Vitro and In Vivo                                                    | 2022 | Coatings                                         |
| Gandolfi M.G.; Spagnuolo G.; Siboni F.; Procino A.; Riviaccio V.; Pelliccioni G.A.; Prati C.; Rengo S.                                                               | Calcium silicate/calcium phosphate biphasic cements for vital pulp therapy: chemical-physical properties and human pulp cells response                       | 2015 | Clinical Oral Investigations                     |
| Lee J.-W., Lee E.-S., Kim B.-I.                                                                                                                                      | Can red fluorescence be useful in diagnostic decision making of residual dentin caries?                                                                      | 2019 | Photodiagnosis and Photodynamic Therapy          |
| Cancio V., Carvalho Ferreira D., Cavalcante F.S., Rosado A.S., Teixeira L.M., Braga Oliveira Q., Barcelos R., Gleiser R., Santos H.F., Dos Santos K.R.N., Primo L.G. | Can the Enterococcus faecalis identified in the root canals of primary teeth be a cause of failure of endodontic treatment?                                  | 2017 | Acta odontologica Scandinavica                   |
| Naseri M, Kharazifard MJ, Hosseinpour S.                                                                                                                             | Canal Configuration of Mesio Buccal Roots in Permanent Maxillary First Molars in Iranian Population: A Systematic Review                                     | 2016 | J Dent (Tehran)                                  |
| Saberi E.A., Mollashahi N.F., Farahi F.                                                                                                                              | Canal transportation caused by one single-file and two multiple-file rotary systems: A comparative study using cone-beam computed tomography                 | 2018 | Giornale Italiano di Endodonzia                  |
| Kramer P.R.; Woodmansey K.F.; White R.; Primus C.M.; Opperman L.A.                                                                                                   | Capping a pulpotomy with calcium aluminosilicate cement: comparison to mineral trioxide aggregates                                                           | 2014 | Journal of endodontics                           |
| Kundzina R., Stangvaltaite L., Eriksen H.M., Kerosuo E.                                                                                                              | Capping carious exposures in adults: a randomized controlled trial investigating mineral trioxide aggregate versus calcium hydroxide                         | 2017 | International endodontic journal                 |
| Ghaderi F, Jowkar Z, Tadayon A.                                                                                                                                      | Caries Color, Extent, and Preoperative Pain as Predictors of Pulp Status in Primary Teeth                                                                    | 2020 | Clin Cosmet Investig Dent                        |
| Habib F, Chaly PE, Junaid M, Musthafa HM.                                                                                                                            | Caries experience, clinical consequences of untreated dental caries and associated factors among school going children - A cross-sectional study             | 2020 | Indian J Dent Res                                |
| Santamaria R.M.; Innes N.P.T.; Machiulskiene V.; Evans D.J.P.; Splith C.H.                                                                                           | Caries management strategies for primary molars: 1-yr randomized control trial results                                                                       | 2014 | Journal of Dental Research                       |

|                                                                                                                                                                                                                   |                                                                                                                                                                                       |      |                                                                   |
|-------------------------------------------------------------------------------------------------------------------------------------------------------------------------------------------------------------------|---------------------------------------------------------------------------------------------------------------------------------------------------------------------------------------|------|-------------------------------------------------------------------|
| Aïem E, Joseph C, Garcia A, Smail-Faugeron V, Muller-Bolla M.                                                                                                                                                     | Caries removal strategies for deep carious lesions in primary teeth: Systematic review                                                                                                | 2020 | Int J Paediatr Dent                                               |
| Zhou W., Niu L.-N., Hu L., Jiao K., Chang G., Shen L.-J., Tay F.R., Chen J.-H.                                                                                                                                    | Caries-resistant bonding layer in dentin                                                                                                                                              | 2016 | Scientific reports                                                |
| Çelik B.N.; Sari S.                                                                                                                                                                                               | Cariou Exposure versus Mechanical Exposure for MTA Pulpotomy in Primary Teeth                                                                                                         | 2016 | BioMed Research International                                     |
| Pavlič A, Vrecl M, Jan J, Bizjak M, Nemec A.                                                                                                                                                                      | Case report of a molar-root incisor malformation in a patient with an autoimmune lymphoproliferative syndrome                                                                         | 2019 | BMC Oral Health                                                   |
| da Mota A.C.C.; Leal C.R.L.; Olivan S.; Gonçalves M.L.L.; de Oliveira V.A.; Pinto M.M.; Bussadori S.K.                                                                                                            | Case report of photodynamic therapy in the treatment of dental caries on primary teeth                                                                                                | 2016 | Journal of Lasers in Medical Sciences                             |
| Nagi P., Waly N., Elbardissy A., Khalifa M.                                                                                                                                                                       | Case report: Immediate pain relief after partial pulpotomy of cariously exposed young permanent molar using mineral trioxide aggregate and root maturation, with two years follow-up. | 2018 | F1000Research                                                     |
| Azab M.M., Moheb D.M., El Shahawy O.I.                                                                                                                                                                            | Case report: Root resorption caused after pulp death of adjacent primary molar.                                                                                                       | 2018 | F1000Research                                                     |
| Zhu L, Cao X, Tao XF.                                                                                                                                                                                             | Case-based learning based on CBCT software in clinical teaching of oral and maxillofacial radiology                                                                                   | 2017 | Shanghai Kou Qiang Yi Xue                                         |
| Topçu K.; Kirici D.; Evcil M.                                                                                                                                                                                     | Catalase activity in healthy and inflamed pulp tissues of permanent teeth in young people                                                                                             | 2016 | Nigerian Journal of Clinical Practice                             |
| Eigbobo J.O.; Gbujie D.C.; Onyiaso C.O.                                                                                                                                                                           | Causes and pattern of tooth extractions in children treated at the University of Port Harcourt Teaching Hospital.                                                                     | 2014 | Odonto-stomatologie tropicale = Tropical dental journal           |
| Olatosi O.O.; Sote E.O.                                                                                                                                                                                           | Causes and pattern of tooth loss in children and adolescents in a Nigerian tertiary hospital.                                                                                         | 2012 | Nigerian quarterly journal of hospital medicine                   |
| Kalender A.; Oztan M.D.; Basmaci F.; Aksoy U.; Orhan K.                                                                                                                                                           | CBCT evaluation of multiple idiopathic internal resorptions in permanent molars: Case report                                                                                          | 2014 | BMC Oral Health                                                   |
| Wang L, Li JP, Ge ZP, Li G.                                                                                                                                                                                       | CBCT image based segmentation method for tooth pulp cavity region extraction                                                                                                          | 2019 | Dentomaxillofac Radiol                                            |
| De Almeida F.J.M.; Hassan D.; Abdulrahman G.N.; Brundin M.; Vestman N.R.                                                                                                                                          | Cbct influences endodontic therapeutic decision-making in immature traumatized teeth with suspected pulp necrosis: A before-after study                                               | 2021 | Dentomaxillofacial Radiology                                      |
| Matsui M.; Kobayashi T.; Tsutsui T.W.                                                                                                                                                                             | CD146 positive human dental pulp stem cells promote regeneration of dentin/pulp-like structures                                                                                       | 2018 | Human Cell                                                        |
| Marques N.C.T.; Neto N.L.; Prado M.T.O.; Vitor L.L.R.; Rodini C.O.; Sakai V.T.; Machado M.A.A.M.; Santos C.F.; Oliveira T.M.                                                                                      | CD31 expression in human primary teeth treated with photobiomodulation therapy                                                                                                        | 2018 | Lasers in Dental Science                                          |
| Galler K.M.; Eidt A.; Schmalz G.                                                                                                                                                                                  | Cell-free approaches for dental pulp tissue engineering                                                                                                                               | 2014 | Journal of Endodontics                                            |
| Rosa JT, Witten PE, Huysseune A.                                                                                                                                                                                  | Cells at the Edge: The Dentin-Bone Interface in Zebrafish Teeth                                                                                                                       | 2021 | Front Physiol                                                     |
| Victoria-Escandell A.; Ibañez-Cabellos J.S.; De Cutanda S.B.-S.; Berenguer-Pascual E.; Beltrán-García J.; García-López E.; Pallardó F.V.; García-Giménez J.L.; Pallarés-Sabater A.; Zarzosa-López I.; Monterde M. | Cellular responses in human dental pulp stem cells treated with three endodontic materials                                                                                            | 2017 | Stem Cells International                                          |
| Bajaj N.; Madan N.; Rathnam A.                                                                                                                                                                                    | Cessation in root development: Ramifications of 'Stevens-Johnson' syndrome                                                                                                            | 2012 | Journal of Indian Society of Pedodontics and Preventive Dentistry |
| Moore E.R.; Michot B.; Erdogan O.; Ba A.; Gibbs J.L.; Yang Y.                                                                                                                                                     | CGRP and Shh Mediate the Dental Pulp Cell Response to Neuron Stimulation                                                                                                              | 2022 | Journal of Dental Research                                        |
| Dursun E, Monnier-Da Costa A, Moussally C.                                                                                                                                                                        | Chairside CAD/CAM Composite Onlays for the Restoration Of Primary Molars                                                                                                              | 2018 | J Clin Pediatr Dent                                               |
| Xu R, Zhou C, Zhang Y, Zhang S, Xie J, Yuan Q.                                                                                                                                                                    | Challenges of Stem-cell-based Craniofacial Regeneration                                                                                                                               | 2021 | Curr Stem Cell Res Ther                                           |
| Álvarez-Quiceno D., Rojas-Martínez P.-A., Cruz-González A.-C.                                                                                                                                                     | Change of dental color and temperature through two bleaching agents boosted with light emitted by diodes                                                                              | 2021 | Journal of Esthetic and Restorative Dentistry                     |
| Mesquita-Guimarães K.S.F.; De Rossi A.; Freitas A.C.; Nelson-Filho P.; Da Silva R.A.; De Queiroz A.M.                                                                                                             | Changes in caries risk and activity of a 9-year-old patient with Niemann-Pick disease type C                                                                                          | 2015 | Case Reports in Dentistry                                         |

|                                                                                                                       |                                                                                                                                                                                              |      |                                                                                        |
|-----------------------------------------------------------------------------------------------------------------------|----------------------------------------------------------------------------------------------------------------------------------------------------------------------------------------------|------|----------------------------------------------------------------------------------------|
| Santana M.D.R.; De Souza A.C.A.; De Assis E.V.; De Abreu L.C.; Valenti V.E.                                           | Changes in heart period during endodontic treatment                                                                                                                                          | 2014 | Experimental and Clinical Cardiology                                                   |
| Stangvaltaite-Mouhat L, Stankeviciene I, Brukiene V, Puriene A, Drachev SN.                                           | Changes in Management Preference of Deep Carious Lesions and Exposed Pulp: Questionnaire Studies with a 10-Year Interval among Dentists in Lithuania                                         | 2022 | Caries Res                                                                             |
| Liu Q.; Gao Z.; Zhu X.; Wu Z.; Li D.; He H.; Huang F.; Fan W.                                                         | Changes in nitric oxide synthase isoforms in the trigeminal ganglion of rat following chronic tooth pulp inflammation                                                                        | 2016 | Neuroscience Letters                                                                   |
| Yang J.; Yang G.; Jin R.; Song G.; Yuan G.                                                                            | Changes in paediatric dental clinic after reopening during COVID-19 pandemic in Wuhan: A retrospective study                                                                                 | 2022 | BMJ Open                                                                               |
| Wu K.; Li C.; Yang Z.; Yang S.; Yang W.; Hua C.                                                                       | Changes in the characteristics of dental emergencies under the influence of SARS-CoV-2 pandemic: a retrospective study                                                                       | 2021 | BMC Oral Health                                                                        |
| Esmaili-Mahani S.; Raoof M.; Abbasnejad M.; Nourzadeh M.                                                              | Changes in the levels of hippocampal BDNF expression are accompanied with inflammatory dental pain-induced learning and memory impairment                                                    | 2018 | Physiology and Pharmacology (Iran)                                                     |
| Ricucci D, Loghin S, Niu LN, Tay FR.                                                                                  | Changes in the radicular pulp-dentine complex in healthy intact teeth and in response to deep caries or restorations: A histological and histobacteriological study                          | 2018 | J Dent                                                                                 |
| Seet R.F.; Chan P.Y.; Khoo S.-T.; Yu V.S.H.; Lui J.-N.                                                                | Characteristics of Cracked Teeth with Reversible Pulpitis After Orthodontic Banding—A Prospective Cohort Study                                                                               | 2022 | Journal of Endodontics                                                                 |
| Zhu Z.-y.; Zhou T.; Zhang B.-w.                                                                                       | Characterization and analysis of matrix metalloproteinases 8 and 20 in the human crown and root dentin                                                                                       | 2012 | Chinese Journal of Tissue Engineering Research                                         |
| Le Clerc J.; Pérard M.; Pellen-Mussi P.; Novella A.; Tricot-Doleux S.; Jeanne S.; Pérez F.                            | Characterization of a programmed necrosis process in 3-dimensional cultures of dental pulp fibroblasts                                                                                       | 2013 | International Endodontic Journal                                                       |
| Edanami N.; Yoshida N.; Ohkura N.; Takeuchi R.; Tohma A.; Noiri Y.; Yoshida K.                                        | Characterization of Dental Pulp Myofibroblasts in Rat Molars after Pulpotomy                                                                                                                 | 2017 | Journal of Endodontics                                                                 |
| Hattori-Sanuki T.; Karakida T.; Chiba-Ohkuma R.; Miake Y.; Yamamoto R.; Yamakoshi Y.; Hosoya N.                       | Characterization of Living Dental Pulp Cells in Direct Contact with Mineral Trioxide Aggregate                                                                                               | 2020 | Cells                                                                                  |
| Torres A, Jacobs R, Lambrechts P, Brizuela C, Cabrera C, Concha G, Pedemonte ME.                                      | Characterization of mandibular molar root and canal morphology using cone beam computed tomography and its variability in Belgian and Chilean population samples                             | 2015 | Imaging Sci Dent                                                                       |
| Marin A.; Morales P.; Jiménez M.; Borja E.; Ivanovic-Zuvic D.; Collins M.T.; Florenzano P.                            | Characterization of Oral Health Status in Chilean Patients with X-Linked Hypophosphatemia                                                                                                    | 2021 | Calcified Tissue International                                                         |
| Zahrán S.; Witherden E.; Mannocci F.; Koller G.                                                                       | Characterization of Root Canal Microbiota in Teeth Diagnosed with Irreversible Pulpitis                                                                                                      | 2021 | Journal of Endodontics                                                                 |
| Zayed M.; Iohara K.; Watanabe H.; Ishikawa M.; Tominaga M.; Nakashima M.                                              | Characterization of stable hypoxia-preconditioned dental pulp stem cells compared with mobilized dental pulp stem cells for application for pulp regenerative therapy                        | 2021 | Stem Cell Research and Therapy                                                         |
| Mounir M.M.F.; Farsi J.M.A.; Alhazzazi T.Y.; Matar M.A.; El-Housseiny A.A.                                            | Characterization of the apical bridge barrier formed following amelogenin apexification                                                                                                      | 2018 | BMC Oral Health                                                                        |
| Bussadori SK, Godoy CH, Alfaya TA, Fernandes KP, Mesquita-Ferrari RA, Motta LJ.                                       | Chemo-mechanical caries removal with Papacarie™: case series with 84 reports and 12 months of follow-up                                                                                      | 2014 | J Contemp Dent Pract                                                                   |
| Zambrano-Achig P, Viteri-García A, Verdugo-Paiva F.                                                                   | Chemo-mechanical removal versus conventional removal for deep caries lesion                                                                                                                  | 2022 | Medwave                                                                                |
| Gürçan A.T.; Bayram M.                                                                                                | Children's dental treatment requirements of first permanent molars with poor prognosis                                                                                                       | 2022 | Clinical Oral Investigations                                                           |
| Sari D.S.; Sakinah N.; Nuri; Suswati E.; Widayawati R.; Maduratna E.                                                  | Chlorogenic Acid Fractionation in Robusta Green Bean Extract as a Combination Agent of Dental Pulp Stem Cells in Periodontal Tissue Engineering                                              | 2022 | Research Journal of Pharmacy and Technology                                            |
| Popovska L.; Zabokova Bilbilova E.; Mircheva E.; Stojanovska V.                                                       | Chronic periapical lesions: correlations with clinical finding                                                                                                                               | 2014 | Prilozi (Makedonska akademija na naukite i umetnostite. Oddelenie za medicinski nauki) |
| do Nascimento I.V.; Rodrigues M.I.D.Q.; Isaías P.H.C.; Barros-Silva P.G.; Sousa F.B.; Nunes Alves A.P.N.; Mota M.R.L. | Chronic systemic corticosteroid therapy influences the development of pulp necrosis and experimental apical periodontitis, exacerbating the inflammatory process and bone resorption in rats | 2022 | International Endodontic Journal                                                       |

|                                                                                                                                                          |                                                                                                                                                                                                               |      |                                                                        |
|----------------------------------------------------------------------------------------------------------------------------------------------------------|---------------------------------------------------------------------------------------------------------------------------------------------------------------------------------------------------------------|------|------------------------------------------------------------------------|
| Worsley M.A.; Allen C.E.; Billinton A.; King A.E.; Boissonade F.M.                                                                                       | Chronic tooth pulp inflammation induces persistent expression of phosphorylated ERK (pERK) and phosphorylated p38 (pp38) in trigeminal subnucleus caudalis                                                    | 2014 | Neuroscience                                                           |
| Ge X.; Li Z.; Zhou Z.; Xia Y.; Bian M.; Yu J.                                                                                                            | Circular RNA SIPA1L1 promotes osteogenesis via regulating the miR-617/Smad3 axis in dental pulp stem cells                                                                                                    | 2020 | Stem Cell Research and Therapy                                         |
| Shivanni S.S., Anjaneyulu K., Balakrishna R.N.                                                                                                           | CLASS III DENTAL CARIES AND NEED FOR ROOT CANAL TREATMENT IN MAXILLARY ANTERIORS - A HOSPITAL BASED RETROSPECTIVE ANALYSIS                                                                                    | 2022 | Journal of Pharmaceutical Negative Results                             |
| Sarmast N.D.; Wang H.H.; Sajadi A.S.; Angelov N.; Dorn S.O.                                                                                              | Classification and Clinical Management of Retrograde Peri-implantitis Associated with Apical Periodontitis: A Proposed Classification System and Case Report                                                  | 2017 | Journal of Endodontics                                                 |
| Shah A, Lee D, Song M, Kim S, Kang MK, Kim RH.                                                                                                           | Clastic cells are absent around the root surface in pulp-exposed periapical periodontitis lesions in mice                                                                                                     | 2018 | Oral Dis                                                               |
| Basir L, Abdi R, Hashemi E.                                                                                                                              | Cleaning efficacy of various root canal irrigants in primary teeth: a scanning electron microscopic study                                                                                                     | 2022 | Gen Dent                                                               |
| Dikopova N.Zh.; Volkov A.G.; Kopecky I.S.; Nikolskaya I.A.; Margaryan E.G.; Budina T.V.; Samokhlib Y.V.; Kondratiev S.A.; Paramonov Y.O.; Arakelyan M.G. | Clinical and experimental validation of the ozone therapy effectiveness in case of accidental exposure of the dental pulp                                                                                     | 2021 | New Armenian Medical Journal                                           |
| Eftimoska M.; Apostolska S.; Rendzhova V.; Gjorgievska E.; Stevanovic M.; Ivanovski K.; Jankulovska M.; Elenchevski S.; Pavlevska M.; Dimkov A.          | Clinical and histological analyzes of the response of the pulp after its direct capping with Calxyl, MTA and Biodentine                                                                                       | 2015 | Research Journal of Pharmaceutical, Biological and Chemical Sciences   |
| Nowicka A.; Łagocka R.; Lipski M.; Parafiniuk M.; Grocholewicz K.; Sobolewska E.; Witek A.; Buczkowska-Radlińska J.                                      | Clinical and Histological Evaluation of Direct Pulp Capping on Human Pulp Tissue Using a Dentin Adhesive System                                                                                               | 2016 | BioMed Research International                                          |
| Mehrvarzfar P.; Abbott P.V.; Mashhadiabbas F.; Vatanpour M.; Tour Savadkouhi S.                                                                          | Clinical and histological responses of human dental pulp to MTA and combined MTA/treated dentin matrix in partial pulpotomy                                                                                   | 2018 | Australian Endodontic Journal                                          |
| Liu H, Peng X, Sun H, Li X.                                                                                                                              | Clinical and histopathological characterization of root resorption in replanted teeth: Two case reports                                                                                                       | 2020 | Medicine (Baltimore)                                                   |
| Montag R, Dietz W, Nietzsche S, Lang T, Weich K, Sigusch BW, Gaengler P.                                                                                 | Clinical and Micromorphologic 29-year Results of Posterior Composite Restorations                                                                                                                             | 2018 | J Dent Res                                                             |
| Shaik D., Dadarwal M., Khan M.M., Dubey A., Sainudeen S., Baniak A., Tiwari H.D.                                                                         | Clinical and radiographic assessments of potassium nitrate in polycarboxylate versus mineral trioxide aggregate as pulpotomy biomaterials in immature mandibular first permanent molars- An original research | 2022 | European Journal of Molecular and Clinical Medicine                    |
| Kahvand M.; Mehran M.; Haghighi T.                                                                                                                       | Clinical and radiographic evaluation of Allium sativum oil (garlic oil) in comparison with formocresol in primary molar pulpotomy                                                                             | 2019 | Journal of International Society of Preventive and Community Dentistry |
| Caruso S., Dinoi T., Marzo G., Campanella V., Giuca M.R., Gatto R., Pasini M.                                                                            | Clinical and radiographic evaluation of biodentine versus calcium hydroxide in primary teeth pulpotomies: a retrospective study                                                                               | 2018 | BMC oral health                                                        |
| AbdelHamid M.B.; Elezz A.F.A.; Fahmy O.M.I.                                                                                                              | Clinical and radiographic evaluation of diode laser and chemical disinfection in comparison to selective caries removal in management of patients with deep carious lesions                                   | 2022 | Lasers in Dental Science                                               |
| Ansari G.; Chitsazan A.; Fekrazad R.; Javadi F.                                                                                                          | Clinical and radiographic evaluation of diode laser pulpotomy on human primary teeth                                                                                                                          | 2018 | Laser Therapy                                                          |
| Goel H., Mathur S., Sachdev V.                                                                                                                           | Clinical and radiographic evaluation of four different zinc-oxide integrated root canal obturating materials used in primary teeth                                                                            | 2018 | Pediatric Dental Journal                                               |
| Elchaghaby MA, Moheb DM, El Shahawy OI, Abd Alsamad AM, Rashed MAM.                                                                                      | Clinical and radiographic evaluation of indirect pulp treatment of young permanent molars using photo-activated oral disinfection versus calcium hydroxide: a randomized controlled pilot trial               | 2020 | BDJ Open                                                               |
| Togaru H.; Muppa R.; Srinivas N.C.; Naveen K.; Reddy V.K.; Rebecca V.C.                                                                                  | Clinical and radiographic evaluation of success of two commercially available pulpotomy agents in primary teeth: An in vivo study                                                                             | 2016 | Journal of Contemporary Dental Practice                                |
| Yildirim C, Basak F, Akgun OM, Polat GG, Altun C.                                                                                                        | Clinical and Radiographic Evaluation of the Effectiveness of Formocresol, Mineral Trioxide Aggregate, Portland Cement, and Enamel Matrix Derivative in Primary Teeth Pulpotomies: A Two Year Follow-Up        | 2016 | J Clin Pediatr Dent                                                    |

|                                                                                                                                                                   |                                                                                                                                                                                                                         |      |                                                                                                                                            |
|-------------------------------------------------------------------------------------------------------------------------------------------------------------------|-------------------------------------------------------------------------------------------------------------------------------------------------------------------------------------------------------------------------|------|--------------------------------------------------------------------------------------------------------------------------------------------|
| Hemavathi, Nagarathna J, Srinath SK, Hiremath MC.                                                                                                                 | Clinical and radiographic evaluation of the efficacy of sodium hypochlorite as a haemostatic agent compared with physiologic saline on the success of calcium hydroxide pulpotomies in primary molars: an in vivo study | 2018 | Eur Arch Paediatr Dent                                                                                                                     |
| Frenkel G, Kaufman A, Ashkenazi M.                                                                                                                                | Clinical and radiographic outcomes of pulpotomized primary molars treated with white or gray mineral trioxide aggregate and ferric sulfate--long-term follow-up                                                         | 2012 | J Clin Pediatr Dent                                                                                                                        |
| Fernandes A.P.; Lourenço Neto N.; Teixeira Marques N.C.; Silveira Moretti A.B.; Sakai V.T.; Cruvinel Silva T.; Andrade Moreira Machado M.A.; Marchini Oliveira T. | Clinical and radiographic outcomes of the use of Low-Level Laser Therapy in vital pulp of primary teeth                                                                                                                 | 2015 | International Journal of Paediatric Dentistry                                                                                              |
| Saber A, El Meligy O, Alaki S, Felemban O.                                                                                                                        | Clinical and Radiographic Success of 2% Chlorhexidine Gluconate with Mineral Trioxide Aggregate in Indirect Pulp Treatment of Primary Molars                                                                            | 2022 | J Dent Child (Chic)                                                                                                                        |
| Stafuzza TC, Vitor LLR, Rios D, Cruvinel Silva T, Machado MAAM, Oliveira TM.                                                                                      | Clinical and Radiographic Success of Selective Caries Removal to Firm Dentin in Primary Teeth: 18-Month Follow-Up                                                                                                       | 2018 | Case Rep Dent                                                                                                                              |
| Ramazani N., Nezhad S.M.                                                                                                                                          | Clinical and radiographic success rate of pulp treated primary molars restored with stainless steel crown (SSC) versus glass ionomer-SSC: A double-blind randomized clinical trial                                      | 2020 | Iranian Journal of Pediatrics                                                                                                              |
| Ulusoy A.T.; Bayrak S.; Bodrumlu E.H.                                                                                                                             | Clinical and radiological evaluation of calcium sulfate as direct pulp capping material in primary teeth                                                                                                                | 2014 | European Journal of Paediatric Dentistry                                                                                                   |
| Lili Y., Yan Z., Shijun Z., Shuai Z., Na W., Jie X., Shue H., Zhiyuan X.                                                                                          | Clinical application of cone beam computed tomography combined with micro-ultrasound technique in treating three mesial canals in mandibular first molars                                                               | 2017 | Hua xi kou qiang yi xue za zhi = Huaxi kouqiang yixue zazhi = West China journal of stomatology                                            |
| Riggs GG, Arzi B, Cissell DD, Hatcher DC, Kass PH, Zhen A, Verstraete FJ.                                                                                         | Clinical Application of Cone-Beam Computed Tomography of the Rabbit Head: Part 1 - Normal Dentition                                                                                                                     | 2016 | Front Vet Sci                                                                                                                              |
| Purayil T.P., Kumar S.S., Upadhyay S.T., Acharya S.R., Anju P.K.                                                                                                  | Clinical applications of glass fiber reinforced composites: A case series                                                                                                                                               | 2020 | Indian Journal of Public Health Research and Development                                                                                   |
| Pietrzycka K, Pawlicka H.                                                                                                                                         | Clinical aspects of pulp stones: A case report series                                                                                                                                                                   | 2020 | Dent Med Probl                                                                                                                             |
| Karteva E.G.; Manchorova N.A.; Vladimirov S.B.; Keskinova D.A.                                                                                                    | Clinical Assessment of Endodontically Treated Teeth, Restored with or without Radicular Posts                                                                                                                           | 2018 | Folia medica                                                                                                                               |
| Vural U.K.; Kiremitçi A.; Gökalp S.                                                                                                                               | Clinical assessment of mineral trioxide aggregate in the treatment of deep carious lesions                                                                                                                              | 2017 | Nigerian Journal of Clinical Practice                                                                                                      |
| Heboyen A.G., Avetisyan A.A., Margaryan M.M.                                                                                                                      | Clinical case of a rarely diagnosed tooth root internal resorption                                                                                                                                                      | 2018 | New Armenian Medical Journal                                                                                                               |
| Reddy S.P., Prasad M.G., Radhakrishna A.N., Sandeep R.V., Divya D.V., Kumar K.V.K.S.                                                                              | Clinical comparison of eggshell derived calcium hydroxyapatite with dycal(®) as indirect pulp capping agents in primary molars                                                                                          | 2020 | Pesquisa Brasileira em Odontopediatria e Clínica Integrada                                                                                 |
| Ozdemir M, Unverdi GE, Geduk N, Ballikaya E, Cehreli ZC.                                                                                                          | Clinical Comparison of Preformed Zirconia and Composite Strip Crowns in Primary Maxillary Incisors: 18-Month Results of a Prospective, Randomized Trial                                                                 | 2022 | Pediatr Dent                                                                                                                               |
| Kotha S.B., Binhuwaishel H.A., Almuhaydib R.N., Alzeghaibi L.Y., Alhajri M.A.                                                                                     | Clinical decision-making in managing deep carious lesions in primary teeth based on clinical experience among pediatric dentists-A cross-sectional study                                                                | 2022 | Journal of population therapeutics and clinical pharmacology = Journal de la therapeutique des populations et de la pharmacologie clinique |
| Setzer F.C.; Kataoka S.H.H.; Natrielli F.; Gondim-Junior E.; Caldeira C.L.                                                                                        | Clinical diagnosis of pulp inflammation based on pulp oxygenation rates measured by pulse oximetry                                                                                                                      | 2012 | Journal of Endodontics                                                                                                                     |
| Wang L., Meng D.-J., Yang Y.-Z., Huang Y.-Q., Cao Q., Yao Z.-H., Tian L.-L.                                                                                       | CLINICAL EFFECT OF ULTRASOUND-COMBINED MINIMALLY INVASIVE ROOT CANAL SURGERY IN THE TREATMENT OF PULPITIS                                                                                                               | 2022 | Acta Medica Mediterranea                                                                                                                   |
| Jordan R.A.; Holzner A.L.; Markovic L.; Brueckner I.; Zimmer S.                                                                                                   | Clinical effectiveness of basic root canal treatment after 24 months: A randomized controlled trial                                                                                                                     | 2014 | Journal of Endodontics                                                                                                                     |
| Amend S, Boutsiouki C, Bekes K, Kloukos D, Gizani S, Lygidakis NN, Frankenberger R, Krämer N.                                                                     | Clinical effectiveness of restorative materials for the restoration of carious lesions in pulp treated primary teeth: a systematic review                                                                               | 2022 | Eur Arch Paediatr Dent                                                                                                                     |
| Amend S, Boutsiouki C, Bekes K, Kloukos D, Lygidakis NN, Frankenberger R, Krämer N.                                                                               | Clinical effectiveness of restorative materials for the restoration of carious primary teeth without pulp therapy: a systematic review                                                                                  | 2022 | Eur Arch Paediatr Dent                                                                                                                     |

|                                                                                                                       |                                                                                                                                                                                                             |      |                                                                                                 |
|-----------------------------------------------------------------------------------------------------------------------|-------------------------------------------------------------------------------------------------------------------------------------------------------------------------------------------------------------|------|-------------------------------------------------------------------------------------------------|
| Wang J, Chen Y, Zhang B, Ge X, Wang X.                                                                                | Clinical efficacy of Er:YAG laser application in pulpotomy of primary molars: a 2-year follow-up study                                                                                                      | 2022 | Lasers Med Sci                                                                                  |
| Heintze SD, Loguercio AD, Hanzen TA, Reis A, Rousson V.                                                               | Clinical efficacy of resin-based direct posterior restorations and glass-ionomer restorations - An updated meta-analysis of clinical outcome parameters                                                     | 2022 | Dent Mater                                                                                      |
| Kusumvalli S, Diwan A, Pasha S, Devale MR, Chowdhary CD, Saikia P.                                                    | Clinical evaluation of biodentine: Its efficacy in the management of deep dental caries                                                                                                                     | 2019 | Indian J Dent Res                                                                               |
| Mohammadzadeh Z.; Parisay I.; Mehrabkhani M.; Madani A.S.; Mazhari F.                                                 | Clinical evaluation of fiber-reinforced composite crowns in pulp-treated primary molars: 12-month results                                                                                                   | 2016 | European Journal of Dentistry                                                                   |
| Hegde S.; Sowmya B.; Mathew S.; Bhandi S.H.; Nagaraja S.; Dinesh K.                                                   | Clinical evaluation of mineral trioxide aggregate and biodentine as direct pulp capping agents in carious teeth                                                                                             | 2017 | Journal of Conservative Dentistry                                                               |
| Niranjani K.; Prasad M.G.; Vasa A.A.; Divya G.; Thakur M.S.; Saujanya K.                                              | Clinical evaluation of success of primary teeth pulpotomy using mineral trioxide aggregate®, laser and biodentine™-an in vivo study                                                                         | 2015 | Journal of Clinical and Diagnostic Research                                                     |
| Phonghanyudh A, Phantumvanit P, Songpaisan Y, Petersen PE.                                                            | Clinical evaluation of three caries removal approaches in primary teeth: a randomised controlled trial                                                                                                      | 2012 | Community Dent Health                                                                           |
| Pach J, Regulski PA, Tomczyk J, Strużycka I.                                                                          | Clinical implications of a diagnosis of taurodontism: A literature review                                                                                                                                   | 2022 | Adv Clin Exp Med                                                                                |
| Yu G., Ye L., Huang D.                                                                                                | Clinical investigation of radix entomolaris in mandibular first molars                                                                                                                                      | 2012 | Hua xi kou qiang yi xue za zhi = Huaxi kouqiang yixue zazhi = West China journal of stomatology |
| Palanisamy V., Rao A., Rao A.                                                                                         | Clinical management of primary mandibular first molars with atypical morphology: Report of two cases                                                                                                        | 2016 | Dental and Medical Problems                                                                     |
| Palanisamy V.; Rao A.; Rao A.                                                                                         | Clinical management of primary mandibular first molars with atypical morphology: Report of two cases; Postępowanie kliniczne w dwóch przypadkach pierwszych mlecznych zębów trzonowych o nietypowej budowie | 2016 | Dental and Medical Problems                                                                     |
| Guang J.; Li J.; Hao L.                                                                                               | Clinical observation and histopathological evaluation of pulp after pulpotomy of primary teeth with formocresol and biodentine                                                                              | 2022 | Cellular and Molecular Biology                                                                  |
| Kulkarni P, Tiwari S, Agrawal N, Kumar A, Umarekar P, Bhargava S.                                                     | Clinical Outcome of Direct Pulp Therapy in Primary Teeth: A Systematic Review and Meta-analysis                                                                                                             | 2022 | J Indian Soc Pedod Prev Dent                                                                    |
| Subbiya A.; Kishen A.; Pradeepkumar A.R.; Srinivasan N.; JothiLatha S.; Janani B.                                     | Clinical Outcome of Nonsurgical Root Canal Treatment Using a Matched Single-Cone Obturation Technique with a Calcium Hydroxide-based Sealer: A Retrospective Analysis                                       | 2022 | Journal of Endodontics                                                                          |
| Schmalz G.; Widbiller M.; Galler K.M.                                                                                 | Clinical Perspectives of Pulp Regeneration                                                                                                                                                                  | 2020 | Journal of Endodontics                                                                          |
| Pandey S.R., Ranjan M.                                                                                                | Clinical practice guidelines in the management of open apex cases                                                                                                                                           | 2020 | International Journal of Pharmaceutical Research                                                |
| Galler KM.                                                                                                            | Clinical procedures for revitalization: current knowledge and considerations                                                                                                                                | 2016 | Int Endod J                                                                                     |
| Chak R.K.; Singh R.K.; Mutyala J.; Killi N.K.                                                                         | Clinical Radiographic Evaluation of 3Mixtatin and MTA in Primary Teeth Pulpotomies: A Randomized Controlled                                                                                                 | 2022 | International Journal of Clinical Pediatric Dentistry                                           |
| Brown J.A.; Murphy B.G.; Clapp K.S.; LaDouceur E.E.B.                                                                 | Clinical, Diagnostic and Histological Findings Involving Cheek Teeth Hypercementosis in Nine Horses                                                                                                         | 2022 | Journal of Veterinary Dentistry                                                                 |
| Mittal M, Gupta N, Kumar A, Chopra R, Barua M.                                                                        | Clinical, microbiological, and radiographic evaluation of sealed carious dentin after minimal intervention in primary molars                                                                                | 2020 | J Indian Soc Pedod Prev Dent                                                                    |
| Oliveira T.M.; Moretti A.B.S.; Sakai V.T.; Lourenço Neto N.; Santos C.F.; Machado M.A.A.M.; Abdo R.C.C.               | Clinical, radiographic and histologic analysis of the effects of pulp capping materials used in pulpotomies of human primary teeth                                                                          | 2013 | European Archives of Paediatric Dentistry                                                       |
| Junqueira M.A.; Cunha N.N.O.; Caixeta F.F.; Marques N.C.T.; Oliveira T.M.; Moretti A.B.S.; Cosme-Silva L.; Sakai V.T. | Clinical, radiographic and histological evaluation of primary teeth pulpotomy using MTA and ferric sulfate                                                                                                  | 2018 | Brazilian Dental Journal                                                                        |
| Songsiripraduboon S, Banlunara W, Sangvanich P, Trairatvorakul C, Thunyakitpisal P.                                   | Clinical, radiographic, and histologic analysis of the effects of acemannan used in direct pulp capping of human primary teeth: short-term outcomes                                                         | 2016 | Odontology                                                                                      |
| Sahin N, Saygili S, Akcay M.                                                                                          | Clinical, radiographic, and histological evaluation of three different pulp-capping materials in indirect pulp treatment of primary teeth: a randomized clinical trial                                      | 2021 | Clin Oral Investig                                                                              |

|                                                                                                               |                                                                                                                                                                                  |      |                                                                                                                      |
|---------------------------------------------------------------------------------------------------------------|----------------------------------------------------------------------------------------------------------------------------------------------------------------------------------|------|----------------------------------------------------------------------------------------------------------------------|
| Abdul M.; Murali N.; Rai P.; Mirza M.; Salim S.; Aparna M.; Singh S.                                          | Clinico-histological evaluation of dentino-pulpal complex of direct pulp capping agents: A clinical study                                                                        | 2021 | Journal of Pharmacy and Bioallied Sciences                                                                           |
| Lee YH, Kim HS, Kim JS, Yu MK, Cho SD, Jeon JG, Yi HK.                                                        | C-myb Regulates Autophagy for Pulp Vitality in Glucose Oxidative Stress                                                                                                          | 2016 | J Dent Res                                                                                                           |
| Khan M.                                                                                                       | Coding guidelines for dentists                                                                                                                                                   | 2014 | SADJ : journal of the South African Dental Association = tydskrif van die Suid-Afrikaanse Tandheelkundige Vereniging |
| Gund M.P.; Hannig M.; Laschke M.W.; Lehmann A.; Schindler A.; Rupf S.                                         | Cold atmospheric plasma does not affect the regenerative potential of the pulp in rats                                                                                           | 2022 | Plasma Processes and Polymers                                                                                        |
| Gover E.; Rakhra D.                                                                                           | Cold Lateral Condensation Root Canal Treatment to Retain Fractured Canines of a Ferret (Mustela Putorius Furo)                                                                   | 2022 | Journal of Exotic Pet Medicine                                                                                       |
| Tavares KIMC, Pinto JC, Santos-Junior AO, Esteves Torres FF, Guerreiro-Tanomaru JM, Tanomaru-Filho M.         | Combination of a new ultrasonic tip with rotary systems for the preparation of flattened root canals                                                                             | 2021 | Restor Dent Endod                                                                                                    |
| Liu X.; Wang C.; Pang L.; Pan L.; Zhang Q.                                                                    | Combination of resolvin E1 and lipoxin A4 promotes the resolution of pulpitis by inhibiting NF-κB activation through upregulating sirtuin 7 in dental pulp fibroblasts           | 2022 | Cell Proliferation                                                                                                   |
| Kim C.K.; Hwang J.-Y.; Hong T.H.; Lee D.M.; Lee K.; Nam H.; Joo K.M.                                          | Combination stem cell therapy using dental pulp stem cells and human umbilical vein endothelial cells for critical hindlimb ischemia                                             | 2022 | BMB Reports                                                                                                          |
| Rahayu R.P.; Pribadi N.; Widjiastuti I.; Nugrahani N.A.                                                       | Combinations of propolis and Ca(OH) <sub>2</sub> in dental pulp capping treatment for the stimulation of reparative dentin formation in a rat model                              | 2020 | F1000Research                                                                                                        |
| Küçükkaya Eren S.; Bahador Zirh E.; Zirh S.; Sharafi P.; Zeybek N.D.                                          | Combined effects of bone morphogenetic protein-7 and mineral trioxide aggregate on the proliferation, migration, and differentiation of human dental pulp stem cells             | 2022 | Journal of Applied Oral Science                                                                                      |
| Susila A.V.; Sugumar R.; Chandana C.S.; Subbarao C.V.                                                         | Combined effects of photodynamic therapy and irrigants in disinfection of root canals                                                                                            | 2016 | Journal of Biophotonics                                                                                              |
| Nagahara T., Takeda K., Aida Y., Iwata T., Yagi R., Kurihara H., Shiba H.                                     | Combined endodontic and periodontal management of a class 3 invasive cervical resorption in a mandibular first molar                                                             | 2018 | Clinical Case Reports                                                                                                |
| Garrido I.; Abella F.; Ordinola-Zapata R.; Duran-Sindreu F.; Roig M.                                          | Combined Endodontic Therapy and Intentional Replantation for the Treatment of Palatogingival Groove                                                                              | 2016 | Journal of Endodontics                                                                                               |
| Castelo-Baz P.; Ramos-Barbosa I.; Martín-Biedma B.; Dablanca-Blanco A.B.; Varela-Patiño P.; Blanco-Carrión J. | Combined endodontic-periodontal treatment of a palatogingival groove                                                                                                             | 2015 | Journal of Endodontics                                                                                               |
| Lee S.; Park Y.-T.; Setzer F.C.                                                                               | Combined Regenerative and Vital Pulp Therapies in an Immature Mandibular Molar: A Case Report                                                                                    | 2020 | Journal of Endodontics                                                                                               |
| Terauchi Y.; Bakland L.K.; Bogen G.                                                                           | Combined Root Canal Therapies in Multirooted Teeth with Pulpal Disease                                                                                                           | 2021 | Journal of Endodontics                                                                                               |
| Vaishnavi Devi B., Ravindran V., Delphine Priscilla Antony S.                                                 | Common irrigants used by pediatric dentists for permanent molar root canal therapy                                                                                               | 2020 | International Journal of Research in Pharmaceutical Sciences                                                         |
| de Almeida T.B.; Zotelli V.L.R.; Wada R.S.; Sousa M.L.R.                                                      | Comparative Analgesia Between Acupuncture and Dipyron in Odontalgia                                                                                                              | 2019 | JAMS Journal of Acupuncture and Meridian Studies                                                                     |
| Katge F.A., Patil D.P.                                                                                        | Comparative Analysis of 2 Calcium Silicate-based Cements (Biodentine and Mineral Trioxide Aggregate) as Direct Pulp-capping Agent in Young Permanent Molars: A Split Mouth Study | 2017 | Journal of endodontics                                                                                               |
| Jacob J., Paul M., Sara B., Steaphen P., Philip N., Mathew J.                                                 | Comparative Analysis of Dentinal Crack Formation Following Root Canal Instrumentation with Hand K-Flex Files, ProTaper Next, and Self-adjusting Files                            | 2019 | The journal of contemporary dental practice                                                                          |
| Faus-Matoses V., Ibáñez E.B., Faus-Llácer V., Ruiz-Sánchez C., Zubizarreta-Macho Á., Faus-Matoses I.          | Comparative Analysis of Ease of Removal of Fractured NiTi Endodontic Rotary Files from the Root Canal System—An In Vitro Study                                                   | 2022 | International Journal of Environmental Research and Public Health                                                    |
| Ren H.; Sang Y.; Zhang F.; Liu Z.; Qi N.; Chen Y.                                                             | Comparative Analysis of Human Mesenchymal Stem Cells from Umbilical Cord, Dental Pulp, and Menstrual Blood as Sources for Cell Therapy                                           | 2016 | Stem Cells International                                                                                             |
| Abbas O.L.; Özatik O.; Gönen Z.B.; Ögüt S.; Özatik F.Y.; Salkin H.; Musmul A.                                 | Comparative Analysis of Mesenchymal Stem Cells from Bone Marrow, Adipose Tissue, and Dental Pulp as Sources of Cell Therapy for Zone of Stasis Burns                             | 2019 | Journal of Investigative Surgery                                                                                     |

|                                                                                                                                                   |                                                                                                                                                                                                                                                                                        |      |                                                                                                              |
|---------------------------------------------------------------------------------------------------------------------------------------------------|----------------------------------------------------------------------------------------------------------------------------------------------------------------------------------------------------------------------------------------------------------------------------------------|------|--------------------------------------------------------------------------------------------------------------|
| Yu S.; Diao S.; Wang J.; Ding G.; Yang D.; Fan Z.                                                                                                 | Comparative analysis of proliferation and differentiation potentials of stem cells from inflamed pulp of deciduous teeth and stem cells from exfoliated deciduous teeth                                                                                                                | 2014 | BioMed Research International                                                                                |
| Loureiro C.; Buzalaf M.A.R.; Pessan J.P.; de Moraes F.R.N.; Pelá V.T.; Ventura T.M.O.; Jacinto R.C.                                               | Comparative analysis of the proteomic profile of the dental pulp in different conditions. A pilot study                                                                                                                                                                                | 2020 | Brazilian Dental Journal                                                                                     |
| Rao H.M., Rajkumar K., Sabnani S., Kumaraswamy M., Vishwanath V., Ramadoss R.                                                                     | COMPARATIVE ASSESSMENT OF CLINICAL OUTCOMES IN VITAL PULP THERAPY WITH BIOACTIVE MTA: AN INVIVO STUDY                                                                                                                                                                                  | 2022 | Journal of Pharmaceutical Negative Results                                                                   |
| Musale P.K., Jain K.R., Kothare S.S.                                                                                                              | Comparative assessment of dentin removal following hand and rotary instrumentation in primary molars using cone-beam computed tomography                                                                                                                                               | 2019 | Journal of the Indian Society of Pedodontics and Preventive Dentistry                                        |
| Sanz J.L.; Soler-Doria A.; López-García S.; García-Bernal D.; Rodríguez-Lozano F.J.; Lozano A.; Llena C.; Forner L.; Guerrero-Gironés J.; Melo M. | Comparative Biological Properties and Mineralization Potential of 3 Endodontic Materials for Vital Pulp Therapy: Theracal PT, Theracal LC, and Biodentine on Human Dental Pulp Stem Cells                                                                                              | 2021 | Journal of Endodontics                                                                                       |
| Küden C.; Karakaş S.N.; Batmaz S.G.                                                                                                               | Comparative chemical properties, bioactivity, and cytotoxicity of resin-modified calcium silicate-based pulp capping materials on human dental pulp stem cells                                                                                                                         | 2022 | Clinical Oral Investigations                                                                                 |
| Lozano-Guillén A.; López-García S.; Rodríguez-Lozano F.J.; Sanz J.L.; Lozano A.; Llena C.; Forner L.                                              | Comparative cytocompatibility of the new calcium silicate-based cement NeoPutty versus NeoMTA Plus and MTA on human dental pulp cells: an in vitro study                                                                                                                               | 2022 | Clinical Oral Investigations                                                                                 |
| Aragão MGB, Costa CAGA, Lima RA, Rodrigues LKA, Duarte S, Zanin ICJ.                                                                              | Comparative Effect of Two Red Lights on Streptococcus mutans Biofilms and Assessment of Temperature Variances in Human Teeth During In Vitro Photodynamic Antimicrobial Chemotherapy                                                                                                   | 2019 | Photobiomodul Photomed Laser Surg                                                                            |
| Vatanpour M., Fazlyab M., Nikzad M.                                                                                                               | Comparative effects of erbium-doped yttrium aluminum garnet laser, the shock wave-enhanced emission photoacoustic streaming, and the conventional needle irrigation on apical extrusion of irrigants                                                                                   | 2022 | Photodiagnosis and Photodynamic Therapy                                                                      |
| Attar R.H., Baghdadi Z.D.                                                                                                                         | Comparative efficacy of active and passive distraction during restorative treatment in children using an iPad versus audiovisual eyeglasses: a randomised controlled trial                                                                                                             | 2015 | European archives of paediatric dentistry : official journal of the European Academy of Paediatric Dentistry |
| Aggarwal V.; Singla M.; Miglani S.; Kohli S.; Singh S.                                                                                            | Comparative evaluation of 1.8 mL and 3.6 mL of 2% lidocaine with 1:200,000 epinephrine for inferior alveolar nerve block in patients with irreversible pulpitis: A prospective, randomized single-blind study                                                                          | 2012 | Journal of Endodontics                                                                                       |
| Syed GA, Mulay SA.                                                                                                                                | Comparative Evaluation of Anesthetic Efficacy of 4% Articaine and 2% Lidocaine for Buccal Infiltration in Adult Patients with Irreversible Pulpitis of Maxillary First Molar: A Prospective Randomized Study                                                                           | 2022 | Contemp Clin Dent                                                                                            |
| Afkhami F, Pirmoazen S, Ardestani A, Fard MJK.                                                                                                    | Comparative evaluation of anesthetic efficacy of inferior alveolar nerve block and inferior alveolar nerve block plus buccal or lingual infiltration using articaine in mandibular molars with irreversible pulpitis: a preliminary prospective randomized single-blind clinical trial | 2021 | Quintessence Int                                                                                             |
| Reddy N.B.N.; Sridhar D.; Rajkumar A.; Murugesan S.; Selvaraj K.; Sankar S.                                                                       | Comparative Evaluation of Antifungal Activity of Octenidine: An In Vitro Confocal Laser Study                                                                                                                                                                                          | 2020 | Journal of Contemporary Dental Practice                                                                      |
| Bhullar K.K., Kaur S., Malhotra S., Singh H., Handa A., Kaur R.                                                                                   | Comparative Evaluation Of Antimicrobial Efficacy Of Three Endodontic Irrigating Solutions Against Enterococcus Faecalis                                                                                                                                                                | 2020 | European Journal of Molecular and Clinical Medicine                                                          |
| Parikh M, Kishan KV, Shah NC, Parikh M, Saklecha P.                                                                                               | Comparative evaluation of biodentine and endosequence root repair material as direct pulp capping material: A clinical study                                                                                                                                                           | 2021 | J Conserv Dent                                                                                               |
| Boddeda K.; Rani C.; V Vanga N.; Chandrabhatla S.                                                                                                 | Comparative evaluation of biodentine, 2% chlorhexidine with RMGIC and calcium hydroxide as indirect pulp capping materials in primary molars: An in vivo study                                                                                                                         | 2019 | Journal of Indian Society of Pedodontics and Preventive Dentistry                                            |
| Khandelwal A., Palanivelu A.                                                                                                                      | Comparative evaluation of canal transportation and centering ability of WaveOne Gold and EndoSequence Reciprocating File systems using cone-beam computed tomography                                                                                                                   | 2020 | Drug Invention Today                                                                                         |



|                                                                                                                        |                                                                                                                                                                                                               |      |                                                              |
|------------------------------------------------------------------------------------------------------------------------|---------------------------------------------------------------------------------------------------------------------------------------------------------------------------------------------------------------|------|--------------------------------------------------------------|
| Beegum M.S.F.; George S.; Anandaraj S.; Sumi Issac J.; Khan S.N.; Ali Habibullah M.                                    | Comparative evaluation of diffused calcium and hydroxyl ion release from three different Indirect pulp capping agents in permanent teeth – An in vitro study                                                  | 2021 | Saudi Dental Journal                                         |
| Aripirala M, Bansal K, Mathur VP, Tewari N, Gupta P, Logani A.                                                         | Comparative evaluation of diode laser and simvastatin gel in pulpotomy of primary molars: A randomized clinical trial                                                                                         | 2021 | J Indian Soc Pedod Prev Dent                                 |
| Sharma N, Malik N, Garg Y, Singh H, Garg K, Bagaria A.                                                                 | Comparative Evaluation of Effect of Lasers and Biodentine in Dentine Regeneration: A Clinical Study                                                                                                           | 2019 | J Contemp Dent Pract                                         |
| Kamath A., Kudva A.R., Kini S.                                                                                         | Comparative evaluation of efficacy of electronic apex locators in determining the working length of the canal which is used during a routine root canal treatment-in vivo study                               | 2019 | Indian Journal of Public Health Research and Development     |
| Yadav P.; Indushekar K.R.; Saraf B.G.; Sheoran N.; Sardana D.                                                          | Comparative evaluation of ferric sulfate, electrosurgical and diode laser on human primary molars pulpotomy: An "in-vivo" study                                                                               | 2014 | Laser Therapy                                                |
| Airen P.; Shigli A.; Airen B.                                                                                          | Comparative evaluation of formocresol and mineral trioxide aggregate in pulpotomized primary molars-2 year follow up                                                                                          | 2012 | Journal of Clinical Pediatric Dentistry                      |
| İslam A.; Özverel C.S.; Yilmaz H.G.                                                                                    | Comparative evaluation of low-level laser therapy on proliferation of long-term cryopreserved human dental pulp cells isolated from deciduous and permanent teeth                                             | 2021 | Lasers in Medical Science                                    |
| Kalaskar R.R., Badhe H.K., Ninawe N.S., Khade A.V., Balasubramanian S., Kamki H.                                       | Comparative Evaluation of Ozonoid Olive Oil and Calcium Hydroxide as an Indirect Pulp Capping Agent in Primary Mandibular Second Molar: A Randomized Controlled Trial                                         | 2022 | The journal of contemporary dental practice                  |
| Altan H.; Belevcikli M.; Coşgun A.; Demir O.                                                                           | Comparative evaluation of pain perception with a new needle-free system and dental needle method in children: a randomized clinical trial                                                                     | 2021 | BMC Anesthesiology                                           |
| Keswani D.; Pandey R.K.; Ansari A.; Gupta S.                                                                           | Comparative evaluation of platelet-rich fibrin and mineral trioxide aggregate as pulpotomy Agents in Permanent Teeth with Incomplete Root Development: A Randomized Controlled Trial                          | 2014 | Journal of Endodontics                                       |
| Bhawalkar A., Mulay S., Desai H., Shetty R.                                                                            | Comparative evaluation of post-operative endodontic pain using various intracanal medicaments after instrumentation with rotary single-file system                                                            | 2021 | Current Pediatric Research                                   |
| Ramamoorthi S.; Nivedhitha M.S.; Divyanand M.J.                                                                        | Comparative evaluation of postoperative pain after using endodontic needle and EndoActivator during root canal irrigation: A randomised controlled trial                                                      | 2015 | Australian Endodontic Journal                                |
| Teja K.V.; Ramesh S.; Vasundhara K.A.                                                                                  | Comparative Evaluation of Preemptive and Preventive Analgesic Effect of Oral Ibuprofen in Single Visit Root Canal Treatment- A Prospective Randomised Pilot Study                                             | 2022 | European Endodontic Journal                                  |
| Ozdemir Y.; Kutukculer N.; Topaloglu-Ak A.; Kose T.; Eronat C.                                                         | Comparative evaluation of pro-inflammatory cytokine levels in pulpotomized primary molars                                                                                                                     | 2015 | Journal of Oral Science                                      |
| Amin L.E.; Montaser M.                                                                                                 | Comparative evaluation of pulpal repair after direct pulp capping using stem cell therapy and biodentine: An animal study                                                                                     | 2021 | Australian Endodontic Journal                                |
| Mali S.R.; Makandar S.; Mangala T.M.; Phase A.                                                                         | Comparative evaluation of reparative dentin formation by using different pulp capping agents: An in vivo study                                                                                                | 2020 | International Journal of Pharmaceutical Research             |
| Khedmat S.; Sarraf P.; Seyedjafari E.; Sanaei-rad P.; Noori F.                                                         | Comparative evaluation of the effect of cold ceramic and MTA-Angelus on cell viability, attachment and differentiation of dental pulp stem cells and periodontal ligament fibroblasts: an in vitro study      | 2021 | BMC Oral Health                                              |
| Satish S.V.; Shetty K.P.; Kilaru K.; Bhargavi P.; Reddy E.S.; Bellutgi A.                                              | Comparative evaluation of the efficacy of 2% lidocaine containing 1:200,000 epinephrine with and without hyaluronidase (75 IU) in patients with irreversible pulpitis                                         | 2013 | Journal of Endodontics                                       |
| Mahapatra J.; Nikhade P.P.; Belsare A.                                                                                 | Comparative evaluation of the efficacy of theracal lc, mineral trioxide aggregate and biodentine as direct pulp capping materials in patients with pulpal exposure in posterior teeth-an interventional study | 2019 | International Journal of Pharmaceutical Research             |
| Hemmanur S., Delphine Priscilla Antony S., Sowmya K.                                                                   | Comparative evaluation of the type of sealer used for obturation of single visit root canal treated maxillary and mandibular posterior teeth-a retrospective analysis                                         | 2020 | International Journal of Research in Pharmaceutical Sciences |
| Nadkarni M.A.; Chen Z.; Wilkins M.R.; Hunter N.                                                                        | Comparative genome analysis of Lactobacillus rhamnosus clinical isolates from initial stages of dental pulp infection: Identification of a new exopolysaccharide cluster                                      | 2014 | PLoS ONE                                                     |
| Nelson-Filho P.; Ruvière D.B.; De Queiroz A.M.; De Paula-Silva F.W.G.; Da Silva R.A.B.; Lucisano M.P.; Da Silva L.A.B. | Comparative molecular analysis of gram-negative bacteria in primary teeth with irreversible pulpitis or periapical pathology                                                                                  | 2018 | Pediatric Dentistry                                          |

|                                                                                                                                                    |                                                                                                                                                                                                                           |      |                                                                   |
|----------------------------------------------------------------------------------------------------------------------------------------------------|---------------------------------------------------------------------------------------------------------------------------------------------------------------------------------------------------------------------------|------|-------------------------------------------------------------------|
| Jefferies S.R.; Swift E.J., Jr.                                                                                                                    | Comparative Performance of Mineral Trioxide Aggregate Versus Calcium Hydroxide as a Direct Pulp Capping Agent                                                                                                             | 2016 | Journal of Esthetic and Restorative Dentistry                     |
| Yi-Yueh L.; Xin G.; Shi-Hao W.; Hui-Ling W.; Gao-Hua W.                                                                                            | Comparative study of auxiliary effect on dental anxiety, pain and compliance during adult dental root canal treatment under therapeutic Chinese music or western classic music                                            | 2014 | Physikalische Medizin Rehabilitationsmedizin Kurortmedizin        |
| Lee H.; Shin Y.; Kim S.-O.; Lee H.-S.; Choi H.-J.; Song J.S.                                                                                       | Comparative Study of Pulpal Responses to Pulpotomy with ProRoot MTA, RetroMTA, and TheraCal in Dogs' Teeth                                                                                                                | 2015 | Journal of Endodontics                                            |
| Bin Alshaibah W.M.; El-Shehaby F.; El-Dokky N.; Reda A.                                                                                            | Comparative study on the microbial adhesion to preveneered and stainless steel crowns                                                                                                                                     | 2012 | Journal of Indian Society of Pedodontics and Preventive Dentistry |
| Bashyam R.; Krishnan R.; Murali K.; Selvarajan N.B.; Vasaviah S.K.; Duraisamy V.                                                                   | Comparative study to evaluate the apical sealing ability of MTA plus and biodentin using a bacterial leakage model: In vitro study                                                                                        | 2021 | International Journal of Current Research and Review              |
| Faruangsang T.; Thaweesapthitak S.; Khamwachirapitak C.; Porntaveetus T.; Shotersuk V.                                                             | Comparative transcriptome profiles of human dental pulp stem cells from maxillary and mandibular teeth                                                                                                                    | 2022 | Scientific Reports                                                |
| Yu Y.-H.; Kushnir L.; Kohli M.; Karabucak B.                                                                                                       | Comparing the incidence of postoperative pain after root canal filling with warm vertical obturation with resin-based sealer and sealer-based obturation with calcium silicate-based sealer: a prospective clinical trial | 2021 | Clinical Oral Investigations                                      |
| Costa E Silva L.L.; Cosme-Silva L.; Sakai V.T.; Lopes C.S.; da Silveira A.P.P.; Moretti Neto R.T.; Gomes-Filho J.E.; Oliveira T.M.; Moretti A.B.S. | Comparison between calcium hydroxide mixtures and mineral trioxide aggregate in primary teeth pulpotomy: A randomized controlled trial                                                                                    | 2019 | Journal of Applied Oral Science                                   |
| Kamel D.O.; Wahba N.A.; Talaat D.M.                                                                                                                | Comparison between positive dental images and neutral images in managing anticipatory anxiety of children                                                                                                                 | 2017 | Journal of Clinical Pediatric Dentistry                           |
| Golbasi F.; Erdemir A.; Kisa U.                                                                                                                    | Comparison of ADAMTS Levels in Pulp Tissue Samples of Healthy and Symptomatic Irreversible Pulpitis Teeth                                                                                                                 | 2022 | Journal of Endodontics                                            |
| Michetti J, Basarab A, Diemer F, Kouame D.                                                                                                         | Comparison of an adaptive local thresholding method on CBCT and $\mu$ CT endodontic images                                                                                                                                | 2017 | Phys Med Biol                                                     |
| Farooq A.; ur Rahman Qazi F.; Siddiqui J.; Faraz S.A.; Rasheed A.                                                                                  | COMPARISON OF AN EXPERIMENTAL ROOT CANAL IRRIGANT (SAPINDUS MUKOROSI) AND ETHYLENEDIAMINETETRAACETIC ACID ON MICROHARDNESS OF HUMAN DENTIN                                                                                | 2022 | Journal of Ayub Medical College                                   |
| Zain M, Rehman Khattak SU, Sikandar H, Shah SA, Fayyaz.                                                                                            | Comparison of Anaesthetic Efficacy of 4% Articaine Primary Buccal Infiltration Versus 2% Lidocaine Inferior Alveolar Nerve Block in Symptomatic Mandibular First Molar Teeth                                              | 2016 | J Coll Physicians Surg Pak                                        |
| Ramzan S, Zaighum M, Iqbal Z, Darshana, Ahmed R., Memon A.                                                                                         | Comparison of anesthetic efficacy of articaine and lidocaine in patients with irreversible pulpitis                                                                                                                       | 2021 | Pakistan Journal of Medical and Health Sciences                   |
| Sarwar H., Ahmed S., Naeem M.M., Shaikh A.A., Raza S.A., Kamal I.                                                                                  | Comparison of Anesthetic efficacy of two different volumes of 4% articaine for inferior alveolar nerve block during endodontic therapy of mandibular molars with symptomatic irreversible pulpitis                        | 2021 | Pakistan Journal of Medical and Health Sciences                   |
| Yahata Y, Masuda Y, Komabayashi T.                                                                                                                 | Comparison of apical centring ability between incisal-shifted access and traditional lingual access for maxillary anterior teeth                                                                                          | 2017 | Aust Endod J                                                      |
| Low N., Zhen Jie S., Bhatia S., Davamani F., Nagendrababu V.                                                                                       | Comparison of Apical Extrusion of Bacteria After Glide Path Preparation Between Manual K File, One G Rotary, and WaveOne Gold Glider Reciprocation Preparations                                                           | 2021 | European endodontic journal                                       |
| Tzanetakis G.N.; Azcarate-Peril M.A.; Zachaki S.; Panopoulos P.; Kontakiotis E.G.; Madianos P.N.; Divaris K.                                       | Comparison of Bacterial Community Composition of Primary and Persistent Endodontic Infections Using Pyrosequencing                                                                                                        | 2015 | Journal of Endodontics                                            |
| Kumar M., Paliwal A., Manish K., Ganapathy S.K., Kumari N., Singh A.R.                                                                             | Comparison of Canal Transportation in TruNatomy, ProTaper Gold, and Hyflex Electric Discharge Machining File Using Cone-beam Computed Tomography                                                                          | 2021 | The journal of contemporary dental practice                       |
| Schoppe C.; Hellige M.; Rohn K.; Ohnesorge B.; Bienert-Zeit A.                                                                                     | Comparison of computed tomography and high-field (3.0 T) magnetic resonance imaging of age-related variances in selected equine maxillary cheek teeth and adjacent tissues                                                | 2017 | BMC Veterinary Research                                           |
| Li L.; Chen H.J.; Lian Y.; Wang T.                                                                                                                 | Comparison of dental pulp periodontal therapy and conventional simple periodontal therapy as treatment modalities for severe periodontitis                                                                                | 2021 | World Journal of Clinical Cases                                   |
| Lee S, Lee K, Kim H, An J, Han J, Lee T, Jeong H, Cho Y.                                                                                           | Comparison of dental radiography and computed tomography: measurement of dentoalveolar structures in healthy, small-sized dogs and cats                                                                                   | 2020 | J Vet Sci                                                         |

|                                                                                                             |                                                                                                                                                                                                      |      |                                                                   |
|-------------------------------------------------------------------------------------------------------------|------------------------------------------------------------------------------------------------------------------------------------------------------------------------------------------------------|------|-------------------------------------------------------------------|
| Banga M., Jasuja P., Khurana H., Thakur A., Sadhar S., Yousuf A.                                            | COMPARISON OF DENTINAL DEFECTS FOLLOWING ROOT CANAL PREPARATION USING MANUAL AND ROTARY INSTRUMENTATION IN EXTRACTED MANDIBULAR PREMOLARS- AN IN VITRO STUDY                                         | 2022 | NeuroQuantology                                                   |
| Valera M.C.; Cardoso F.G.D.R.; Chung A.; Xavier A.C.C.; Figueiredo M.D.; Martinho F.C.; Palo R.M.           | Comparison of different irrigants in the removal of endotoxins and cultivable microorganisms from infected root canals                                                                               | 2015 | Scientific World Journal                                          |
| Najmi N., Jameel A., Abidi Y.                                                                               | Comparison of Efficacy of Mineral Trioxide Aggregate and Calcium Hydroxide as Pulpotomy Agents in Primary Molars                                                                                     | 2022 | Medical Forum Monthly                                             |
| Nagi S.E.; Khan F.R.; Rahman M.                                                                             | Comparison of fracture and deformation in the rotary endodontic instruments: Protaper versus K-3 system                                                                                              | 2016 | JPMA. The Journal of the Pakistan Medical Association             |
| Salehi F.; Dibaj M.; Mohammadi A.; Sattari M.                                                               | Comparison of Gene Expression of Different Isoforms of Osteopontin in Symptomatic Irreversible Pulpitis of Human Dental Pulp                                                                         | 2022 | Iranian Endodontic Journal                                        |
| Sushynski JM, Zealand CM, Botero TM, Boynton JR, Majewski RF, Shelburne CE, Hu JC.                          | Comparison of gray mineral trioxide aggregate and diluted formocresol in pulpotomized primary molars: a 6- to 24-month observation                                                                   | 2012 | Pediatr Dent                                                      |
| Bierma M.M.; McClanahan S.; Baisden M.K.; Bowles W.R.                                                       | Comparison of heat-testing methodology                                                                                                                                                               | 2012 | Journal of Endodontics                                            |
| Ghattas Ayoub C.; Aminoshariae A.; Bakkar M.; Ghosh S.; Bonfield T.; Demko C.; Montagnese T.A.; Mickel A.K. | Comparison of IL-1 $\beta$ , TNF- $\alpha$ , hBD-2, and hBD-3 Expression in the Dental Pulp of Smokers Versus Nonsmokers                                                                             | 2017 | Journal of Endodontics                                            |
| Chen X, Zhang H, Zhong J, Yan W, Lin B, Ding M, Xue S, Xia B.                                               | Comparison of indirect pulp treatment and iRoot BP Plus pulpotomy in primary teeth with extremely deep caries: a prospective randomized trial                                                        | 2021 | Clin Oral Investig                                                |
| Gregory P, Lea J, Walinski C, Terese-Koch D, Hottel T, Fields D, Rodriguez C.                               | Comparison of Laser Versus Rotary Instrumentation- A Case Study                                                                                                                                      | 2016 | J Tenn Dent Assoc                                                 |
| Asopa S.S., Asopa V., Arya A., Attargekar V., Chabra C., Gupta D.                                           | Comparison of long-term outcome of implant supported crowns and root canal treated crowns: An observational study                                                                                    | 2022 | NeuroQuantology                                                   |
| Madhavan S, Jude SM, Achammada S, Ullattuthodi S, Kuriachan T, Jacob J.                                     | Comparison of Marginal Accuracy of Interim Restoration Fabricated from Self-cure Composite and Autopolymerizing Acrylic Resin: An In Vitro Study                                                     | 2020 | J Pharm Bioallied Sci                                             |
| Drumond J.P.S.C.; Maeda W.; Nascimento W.M.; Campos D.D.L.; Prado M.C.; de-Jesus-Soares A.; Frozoni M.      | Comparison of Postobturation Pain Experience after Apical Extrusion of Calcium Silicate- and Resin-Based Root Canal Sealers                                                                          | 2021 | Journal of Endodontics                                            |
| Tavakoli A.; Tazik M.E.; Abbasi A.                                                                          | Comparison of Production of Pain and Oxidative Stress after Induction of Local Nerve Block or Use of NSAIDs following Painful Dental Procedures in Dogs                                              | 2021 | Iranian Journal of Veterinary Surgery                             |
| De Rossi A.; Silva L.A.; Gatón-Hernández P.; Sousa-Neto M.D.; Nelson-Filho P.; Silva R.A.; de Queiroz A.M.  | Comparison of pulpal responses to pulpotomy and pulp capping with biodentine and mineral trioxide aggregate in dogs                                                                                  | 2014 | Journal of endodontics                                            |
| Zeynep E., Gunes B., Bayrakdar I.S.                                                                         | Comparison of root canal shaping ability of different heat-treated NiTi single files: A micro-CT study                                                                                               | 2022 | Quintessence International                                        |
| Boby A.; Pai D.; Ginjupalli K.; Gaur S.                                                                     | Comparison of shear bond strength of light cure mineral trioxide aggregate and light cure calcium hydroxide with nanofilled composite: A stereomicroscopic and scanning electron microscope analysis | 2020 | Journal of Indian Society of Pedodontics and Preventive Dentistry |
| Pereira L.O.; Rubini M.R.; Silva J.R.; Oliveira D.M.; Silva I.C.R.; Poças-Fonseca M.J.; Azevedo R.B.        | Comparison of stem cell properties of cells isolated from normal and inflamed dental pulps                                                                                                           | 2012 | International Endodontic Journal                                  |
| Marty M.; Broutin A.; Vergnes J.-N.; Vaysse F.                                                              | Comparison of student's perceptions between 3D printed models versus series models in paediatric dentistry hands-on session                                                                          | 2019 | European Journal of Dental Education                              |
| AlMotawah F.N., Pani S.C., AlKharashi T., AlKhalaf S., AlKhatlan M., AlSultan F., AlMughirah A.             | Comparison of survival rates of stainless-steel crowns placed with and without pulpotomy: A two-year retrospective study                                                                             | 2020 | International Journal of Dentistry                                |
| Adibi A, Sobhnamayan F, Ostovar Zijerdi N, Tajik M, Paknahad M.                                             | Comparison of the Accuracy of CBCT Images and Apex Locator in Detection of External Root Resorption with Perforation                                                                                 | 2022 | J Dent (Shiraz)                                                   |

|                                                                                                            |                                                                                                                                                                                                                                            |      |                                                             |
|------------------------------------------------------------------------------------------------------------|--------------------------------------------------------------------------------------------------------------------------------------------------------------------------------------------------------------------------------------------|------|-------------------------------------------------------------|
| Jaouni A.W.A., Abboud S.                                                                                   | Comparison of the Bond Strength of Circular and Oval-Shaped FiberReinforced Composite Posts in Oval Shaped Canals                                                                                                                          | 2022 | Research Journal of Pharmacy and Technology                 |
| Melo Ribeiro M.V.D.; Silva-Sousa Y.T.; Versiani M.A.; Lamira A.; Steier L.; Pécora J.D.; Sousa-Neto M.D.D. | Comparison of the cleaning efficacy of self-adjusting file and rotary systems in the apical third of oval-shaped canals                                                                                                                    | 2013 | Journal of Endodontics                                      |
| Lei X., Liu Q., Qian H., Ren F., Fang J., Liu H., Wu X., Yang J.                                           | Comparison of the clinical efficacy of iRoot BP plus with mineral trioxide aggregate in the pulpotomy of deciduous teeth                                                                                                                   | 2020 | International Journal of Clinical and Experimental Medicine |
| Soukup JW, Drees R, Koenig LJ, Snyder CJ, Hetzel S, Miles CR, Schwarz T.                                   | Comparison of the Diagnostic Image Quality of the Canine Maxillary Dentoalveolar Structures Obtained by Cone Beam Computed Tomography and 64-Multidetector Row Computed Tomography                                                         | 2015 | J Vet Dent                                                  |
| Hajihassani N., Mohammadi N., Karimi Kelayeh A., Aalaei S.                                                 | Comparison of the effect of post space preparation time on the apical seal of two different sealers                                                                                                                                        | 2022 | BMC oral health                                             |
| Beus C.; Safavi K.; Stratton J.; Kaufman B.                                                                | Comparison of the effect of two endodontic irrigation protocols on the elimination of bacteria from root canal system: A prospective, randomized clinical trial                                                                            | 2012 | Journal of Endodontics                                      |
| Kebriaee F.; Sarraf Shirazi A.; Fani K.; Moharreri F.; Soltanifar A.; Khaksar Y.; Mazhari F.               | Comparison of the effects of cognitive behavioural therapy and inhalation sedation on child dental anxiety                                                                                                                                 | 2015 | European Archives of Paediatric Dentistry                   |
| Cimilli H.; Karacayli U.; Şişman N.; Kartal N.; Mumcu G.                                                   | Comparison of the oral health-related quality of life and dental pain in symptomatic irreversible pulpitis and pericoronitis                                                                                                               | 2012 | Journal of Dental Sciences                                  |
| Łuczaj-Cepowicz E.; Marczuk-Kolada G.; Pawińska M.; Różycki J.; Chorzewska E.                              | Comparison of the radiopacity of selected materials used for vital pulp therapy: An in vitro assessment; Porównanie pochłaniania promieni rentgenowskich przez wybrane materiały stosowane w leczeniu biologicznym miazgi – ocena in vitro | 2019 | Dental and Medical Problems                                 |
| Teixeira VP, Rodrigues DB, Reis MA, Castro EC, Piccioni DE, Beghini M, de Lima Pereira SA.                 | Comparison of the total length and areas of upper central incisors between males and females using computer-assisted morphometry                                                                                                           | 2013 | Anat Sci Int                                                |
| Ayedun O.S.; Oredugba F.A.; Sote E.O.                                                                      | Comparison of the treatment outcomes of the conventional stainless steel crown restorations and the hall technique in the treatment of carious primary molars                                                                              | 2021 | Nigerian Journal of Clinical Practice                       |
| Vanitha S, Sherwood IA.                                                                                    | Comparison of three different apex locators in determining the working length of mandibular first molar teeth with irreversible pulpitis compared with an intraoral periapical radiograph: A block randomized, controlled, clinical trial  | 2019 | J Investig Clin Dent                                        |
| Selvendran K.E.; Ahamed A.S.; Krishnamurthy M.; Kumar V.N.; Raju V.                                        | Comparison of three different materials used for indirect pulp capping in permanent molars: An in vivo study                                                                                                                               | 2022 | Journal of Conservative Dentistry                           |
| Poludasu M.; Mallela G.M.K.; Puppala R.; Kethineni B.; Dandotikar D.                                       | Comparison of Three Treatment Techniques for Deep Carious Lesions in Primary Teeth: An In Vivo Study                                                                                                                                       | 2022 | International Journal of Clinical Pediatric Dentistry       |
| Rouhani A, Akbari M, Farhadi-Faz A.                                                                        | Comparison of Tooth Discoloration Induced by Calcium-Enriched Mixture and Mineral Trioxide Aggregate                                                                                                                                       | 2016 | Iran Endod J                                                |
| Beer F.; Buchmair A.; Wernisch J.; Georgopoulos A.; Moritz A.                                              | Comparison of two diode lasers on bactericidity in root canals-an in vitro study                                                                                                                                                           | 2012 | Lasers in Medical Science                                   |
| Waly A.S., Yamany I., Abbas H.M., A Alsairafi M.A., F Bazzaz R.M., Bogari D.F., Alhazzazi T.Y.             | Comparison of two pediatric rotary file systems and hand instrumentation in primary molar: An ex vivo cone-beam computed tomographic study                                                                                                 | 2021 | Nigerian journal of clinical practice                       |
| Armand A.; Khani M.; Asnaashari M.; AliAhmadi A.; Shokri B.                                                | Comparison study of root canal disinfection by cold plasma jet and photodynamic therapy                                                                                                                                                    | 2019 | Photodiagnosis and Photodynamic Therapy                     |
| Giraud T.; Rufas P.; Chmielewsky F.; Rombouts C.; Dejou J.; Jeanneau C.; About I.                          | Complement Activation by Pulp Capping Materials Plays a Significant Role in Both Inflammatory and Pulp Stem Cells' Recruitment                                                                                                             | 2017 | Journal of Endodontics                                      |
| Pultanasarn P., Thaungwilai K., Singhatanadgid P., Prateepsawangwong B., Singhatanadgit W.                 | Composite core-supported stainless steel crowns enhance fracture resistance of severely damaged primary posterior teeth                                                                                                                    | 2020 | Pediatric Dental Journal                                    |
| Lei F.; Zhang H.; Xie X.                                                                                   | Comprehensive analysis of an lncRNA-miRNA-mRNA competing endogenous RNA network in pulpitis                                                                                                                                                | 2019 | PeerJ                                                       |
| Liu L.; Wang T.; Huang D.; Song D.                                                                         | Comprehensive Analysis of Differentially Expressed Genes in Clinically Diagnosed Irreversible Pulpitis by                                                                                                                                  | 2021 | Journal of Endodontics                                      |

|                                                                                                                                                                           |                                                                                                                                                                                                                                 |      |                                                                                                                                                                                                         |
|---------------------------------------------------------------------------------------------------------------------------------------------------------------------------|---------------------------------------------------------------------------------------------------------------------------------------------------------------------------------------------------------------------------------|------|---------------------------------------------------------------------------------------------------------------------------------------------------------------------------------------------------------|
|                                                                                                                                                                           | Multiplatform Data Integration Using a Robust Rank Aggregation Approach                                                                                                                                                         |      |                                                                                                                                                                                                         |
| Wang Y, Wu L, Guo H, Qiu T, Huang Y, Lin B, Wang L.                                                                                                                       | Computation of tooth axes of existent and missing teeth from 3D CT images                                                                                                                                                       | 2015 | Biomed Tech (Berl)                                                                                                                                                                                      |
| Kurthukoti AJ, Sharma P, Swamy DF, Shashidara R, Swamy EB.                                                                                                                | Computed Tomographic Morphometry of the Internal Anatomy of Mandibular Second Primary Molars                                                                                                                                    | 2015 | Int J Clin Pediatr Dent                                                                                                                                                                                 |
| Suardita K.; Arundina I.; Tedjosasongko U.; Yuliati A.; Peeters H.H.; Wijaksana I.K.E.; Surboyo M.D.C.                                                                    | Concanavalin A Enhanced Proliferation and Osteogenic Differentiation of Dental Pulp Stem Cells                                                                                                                                  | 2020 | European Journal of Dentistry                                                                                                                                                                           |
| Setiati H.D., Suprastiwi E., Artiningsih D.A.N.P., Utami L.P.T.B.                                                                                                         | Concentration dependent effects of carboxymethyl chitosan on dentin remineralization with amorphous calcium phosphate                                                                                                           | 2020 | International Journal of Applied Pharmaceutics                                                                                                                                                          |
| Evrosimovska B.; Dimova C.; Kovacevska L.; Panov S.                                                                                                                       | Concentration of collagenases (MMP-1, -8, -13) in patients with chronically inflamed dental pulp tissue                                                                                                                         | 2012 | Prilozi / Makedonska akademija na naukite i umetnostite, Oddelenie za biološki i medicinski nauki = Contributions / Macedonian Academy of Sciences and Arts, Section of Biological and Medical Sciences |
| Lacerda-Pinheiro S.; Dimitrova-Nakov S.; Harichane Y.; Souyri M.; Petit-Cocault L.; Legrès L.; Marchadier A.; Baudry A.; Ribes S.; Goldberg M.; Kellermann O.; Poliard A. | Concomitant multipotent and unipotent dental pulp progenitors and their respective contribution to mineralised tissue formation                                                                                                 | 2012 | European Cells and Materials                                                                                                                                                                            |
| Anjali P., Varma B., Suresh Kumar J., Kumaran P., Xavier A.M.                                                                                                             | Concurrent Occurrence of Bilateral Hypodontia and Microdontia in a Nonsyndromic Paediatric Patient: A Case Report                                                                                                               | 2020 | Journal of Clinical and Diagnostic Research                                                                                                                                                             |
| Hall B.E.; Zhang L.; Sun Z.J.; Utreras E.; Prochazkova M.; Cho A.; Terse A.; Arany P.; Dolan J.C.; Schmidt B.L.; Kulkarni A.B.                                            | Conditional TNF- $\alpha$ Overexpression in the Tooth and Alveolar Bone Results in Painful Pulpitis and Osteitis                                                                                                                | 2016 | Journal of Dental Research                                                                                                                                                                              |
| Krishnan U.; Moule A.J.; Alawadhi A.                                                                                                                                      | Cone beam CT assisted re-treatment of class 3 invasive cervical resorption                                                                                                                                                      | 2015 | BMJ Case Reports                                                                                                                                                                                        |
| Hasheminia S.M., Farhad A., Sheikhi M., Soltani P., Hendi S.S., Ahmadi M.                                                                                                 | Cone-beam Computed Tomographic Analysis of Canal Transportation and Centering Ability of Single-file Systems                                                                                                                    | 2018 | Journal of endodontics                                                                                                                                                                                  |
| Zoya-Farook A.; Abhishek P.; Shahabadi A.                                                                                                                                 | Cone-beam Computed Tomographic Evaluation and Endodontic Management of a Mandibular First Premolar with Type IX Canal Configuration: Case Report                                                                                | 2017 | Journal of Endodontics                                                                                                                                                                                  |
| Zhao L.; Pan J.; Xu L.; Pallikonda Rajasekaran M.                                                                                                                         | Cone-Beam Computed Tomography Image Features under Intelligent Three-Dimensional Reconstruction Algorithm in the Evaluation of Intraoperative and Postoperative Curative Effect of Dental Pulp Disease Using Root Canal Therapy | 2022 | Scientific Programming                                                                                                                                                                                  |
| Celikten B, Orhan K, Aksoy U, Tufenkci P, Kalender A, Basmaci F, Dabaj P.                                                                                                 | Cone-beam CT evaluation of root canal morphology of maxillary and mandibular premolars in a Turkish Cypriot population                                                                                                          | 2016 | BDJ Open                                                                                                                                                                                                |
| Komiya H, Shimizu K, Ishii K, Kudo H, Okamura T, Kanno K, Shinoda M, Ogiso B, Iwata K.                                                                                    | Connexin 43 expression in satellite glial cells contributes to ectopic tooth-pulp pain                                                                                                                                          | 2018 | J Oral Sci                                                                                                                                                                                              |
| Sanjari K., Bayani M., Zadeh H.E.                                                                                                                                         | Conservative dental management of a patient with Epidermolysis bullosa. A case report                                                                                                                                           | 2020 | Pediatric Dental Journal                                                                                                                                                                                |
| Taha N.A., About I., Sedgley C.M., Messer H.H.                                                                                                                            | Conservative Management of Mature Permanent Teeth with Carious Pulp Exposure                                                                                                                                                    | 2020 | Journal of endodontics                                                                                                                                                                                  |
| Ali A.; Arslan H.; Jethani B.                                                                                                                                             | Conservative management of Type II dens invaginatus with guided endodontic approach: A case series                                                                                                                              | 2019 | Journal of Conservative Dentistry                                                                                                                                                                       |
| Yong D, Cathro P.                                                                                                                                                         | Conservative pulp therapy in the management of reversible and irreversible pulpitis                                                                                                                                             | 2021 | Aust Dent J                                                                                                                                                                                             |
| Marinčák D.; Doležel V.; Příbyl M.; Voborná I.; Marek I.; Šedý J.; Žižka R.                                                                                               | Conservative treatment of complicated crown fracture and crown-root fracture of young permanent incisor—A case report with 24-month follow-up                                                                                   | 2021 | Children                                                                                                                                                                                                |
| Stratigaki E, Tong HJ, Seremidi K, Kloukos D, Duggal M, Gizani S.                                                                                                         | Contemporary management of deep caries in primary teeth: a systematic review and meta-analysis                                                                                                                                  | 2022 | Eur Arch Paediatr Dent                                                                                                                                                                                  |
| Fouad A.F.                                                                                                                                                                | Contemporary Microbial and Antimicrobial Considerations in Regenerative Endodontic Therapy                                                                                                                                      | 2020 | Journal of Endodontics                                                                                                                                                                                  |

|                                                                                                                                                                       |                                                                                                                                                          |      |                                            |
|-----------------------------------------------------------------------------------------------------------------------------------------------------------------------|----------------------------------------------------------------------------------------------------------------------------------------------------------|------|--------------------------------------------|
| Frozoni M, Marques MR, Hamasaki SK, Mohara NT, de Jesus Soares A, Zaia AA.                                                                                            | Contribution of Bone Marrow-derived Cells to Reparative Dentinogenesis Using Bone Marrow Transplantation Model                                           | 2020 | J Endod                                    |
| Nomura R, Matayoshi S, Otsugu M, Kitamura T, Teramoto N, Nakano K.                                                                                                    | Contribution of Severe Dental Caries Induced by Streptococcus mutans to the Pathogenicity of Infective Endocarditis                                      | 2020 | Infect Immun                               |
| Nomura R.; Ogaya Y.; Nakano K.                                                                                                                                        | Contribution of the collagen-binding proteins of Streptococcus mutans to bacterial colonization of inflamed dental pulp                                  | 2016 | PLoS ONE                                   |
| Matoso F.B., Grecca F.S., Pinheiro L.S., Leitune V.C.B., Guterres S., Collares F.M., Kopper P.M.P.                                                                    | Controlled drug delivery system endodontic paste as intracanal medication: a bench-to-chair-side case report                                             | 2022 | Giornale Italiano di Endodonzia            |
| Swanson W.B., Gong T., Zhang Z., Eberle M., Niemann D., Dong R., Rambhia K.J., Ma P.X.                                                                                | Controlled release of odontogenic exosomes from a biodegradable vehicle mediates dentinogenesis as a novel biomimetic pulp capping therapy               | 2020 | Journal of Controlled Release              |
| Kharel B., Rai A., Suwal P., Parajuli P.K., Limbu L., Basnet B.B.                                                                                                     | Conventional tooth supported overdenture: A case report                                                                                                  | 2021 | Journal of Nepalese Prosthodontic Society  |
| Schwendicke F.; Stolpe M.; Innes N.                                                                                                                                   | Conventional treatment, Hall Technique or immediate pulpotomy for carious primary molars: a cost-effectiveness analysis                                  | 2016 | International Endodontic Journal           |
| Schaefferkoetter J., Yan J., Ortega C., Sertic A., Lechtman E., Eshet Y., Metser U., Veit-Haibach P.                                                                  | Convolutional neural networks for improving image quality with noisy PET data                                                                            | 2020 | EJNMMI Research                            |
| Havale R, Rao DG, Latha AM, Nagaraj M, Karobari NM, Tharay N.                                                                                                         | Coronal pulp: An age biomarker - A cross-sectional radiographic study in children                                                                        | 2020 | J Oral Maxillofac Pathol                   |
| Sulaiman AO, Shaba OP, Dosumu OO, Ajayi DM.                                                                                                                           | Coronal tissue loss in endodontically treated teeth                                                                                                      | 2012 | Afr J Med Med Sci                          |
| Kim Y.-B.; Joo W.-H.; Min K.-S.                                                                                                                                       | Coronectomy of a lower third molar in combination with vital pulp therapy                                                                                | 2014 | European Journal of Dentistry              |
| Ghousia S., Nyer Firdoose C.S.                                                                                                                                        | Coronoid foramina in a pediatric mandible: An incidental finding of a morphologic and developmental anatomic variant as a distinctive documented feature | 2021 | National Journal of Clinical Anatomy       |
| Ricucci D, Loghin S, Siqueira JF Jr.                                                                                                                                  | Correlation between clinical and histologic pulp diagnoses                                                                                               | 2014 | J Endod                                    |
| Muniz FWMG, Montagner F, Jacinto RC, Rösing CK, Gomes BPFA.                                                                                                           | Correlation between crestal alveolar bone loss with intracanal bacteria and apical lesion area in necrotic teeth                                         | 2018 | Arch Oral Biol                             |
| Di Murro B.; Papi P.; Di Murro C.; Pompa G.; Gambarini G.                                                                                                             | Correlation between endodontic pulpal/periapical disease and retrograde peri-implantitis: A case series                                                  | 2021 | Australian Endodontic Journal              |
| Naseri M.; Khayat A.; Zamaheni S.; Shojaeian S.                                                                                                                       | Correlation between histological status of the pulp and its response to sensibility tests                                                                | 2017 | Iranian Endodontic Journal                 |
| Rechenberg D.K.; Munir A.; Zehnder M.                                                                                                                                 | Correlation between the clinically diagnosed inflammatory process and periapical index scores in severely painful endodontically involved teeth          | 2021 | International Endodontic Journal           |
| Brüllmann D.D., Schmidtman I., Hornstein S., Schulze R.K.                                                                                                             | Correlation of cone beam computed tomography (CBCT) findings in the maxillary sinus with dental diagnoses: A retrospective cross-sectional study         | 2012 | Clinical Oral Investigations               |
| Uhrich E.; Gautam M.; Hatton J.; Rowland K.                                                                                                                           | Corticotropin releasing factor receptor expression in painful human dental pulp                                                                          | 2015 | Archives of Oral Biology                   |
| Abukabbos H, Tomar S, Guelmann M.                                                                                                                                     | Cost Estimates for Bioactive Cement Pulpotomies and Crowns in Primary Molars                                                                             | 2018 | Pediatr Dent                               |
| Schwendicke F, Rossi JG, Krois J, Basso M, Peric T, Turkun LS, Miletic I.                                                                                             | Cost-effectiveness of glass hybrid versus composite in a multi-country randomized trial                                                                  | 2021 | J Dent                                     |
| Savolainen N, Kvist T, Mannila J.                                                                                                                                     | Cost-effectiveness of partial versus stepwise caries removal of deep caries lesions - a decision-analytic approach                                       | 2023 | Acta Odontol Scand                         |
| Bergamo M.T.; Vitor L.L.R.; Dionísio T.J.; Marques N.C.T.; Oliveira R.C.; Ambrosio E.C.P.; Sakai V.T.; Santos C.F.; Lourenço Neto N.; Machado M.A.A.M.; Oliveira T.M. | Could the photobiomodulation therapy induce angiogenic growth factors expression from dental pulp cells?                                                 | 2021 | Lasers in Medical Science                  |
| De Toubes K.M.P.; Tonelli S.Q.; Nunes E.; Silveira F.F.                                                                                                               | Cracked teeth: What clinicians and specialists need to know                                                                                              | 2021 | Dental Press Endodontics                   |
| Sadasiva K., Ramalingam S., Rajaram K., Meiyappan A.                                                                                                                  | Cracked tooth syndrome: A report of three cases                                                                                                          | 2015 | Journal of Pharmacy and Bioallied Sciences |

|                                                                                                                                       |                                                                                                                                                                       |      |                                                                                                                                |
|---------------------------------------------------------------------------------------------------------------------------------------|-----------------------------------------------------------------------------------------------------------------------------------------------------------------------|------|--------------------------------------------------------------------------------------------------------------------------------|
| Varghese N.S.; Cherian J.; Thomas A.                                                                                                  | Credibility of YouTube™ videos on root canal treatment in children                                                                                                    | 2022 | Journal of Indian Society of Pedodontics and Preventive Dentistry                                                              |
| Crespo-Gallardo I, Hay-Levytska O, Martín-González J, Jiménez-Sánchez MC, Sánchez-Domínguez B, Segura-Egea JJ.                        | Criteria and treatment decisions in the management of deep caries lesions: Is there endodontic overtreatment?                                                         | 2018 | J Clin Exp Dent                                                                                                                |
| Browning W.D.                                                                                                                         | Critical appraisal. 2015 Update: Approaches to Caries Removal                                                                                                         | 2015 | Journal of esthetic and restorative dentistry : official publication of the American Academy of Esthetic Dentistry ... [et al. |
| Blanchard K.; Koehm J.                                                                                                                | Crown reduction and vital pulp therapy in a dog with malocclusion                                                                                                     | 2018 | Journal of Veterinary Dentistry                                                                                                |
| Ma L.; Makino Y.; Yamaza H.; Akiyama K.; Hoshino Y.; Song G.; Kukita T.; Nonaka K.; Shi S.; Yamaza T.                                 | Cryopreserved Dental Pulp Tissues of Exfoliated Deciduous Teeth Is a Feasible Stem Cell Resource for Regenerative Medicine                                            | 2012 | PLoS ONE                                                                                                                       |
| Joshi C, Joshi S.                                                                                                                     | C-shaped canal in maxillary first molars: a case report                                                                                                               | 2014 | J Dent (Tehran)                                                                                                                |
| Nejaim Y, Gomes AF, Rosado LPL, Freitas DQ, Martins JNR, da Silva EJNL.                                                               | C-shaped canals in mandibular molars of a Brazilian subpopulation: prevalence and root canal configuration using cone-beam computed tomography                        | 2020 | Clin Oral Investig                                                                                                             |
| Ozcan G., Sekerci A.E., Kocoglu F.                                                                                                    | C-shaped mandibular primary first molar diagnosed with cone beam computed tomography: A novel case report and literature review of primary molars' root canal systems | 2016 | Journal of the Indian Society of Pedodontics and Preventive Dentistry                                                          |
| Martins J.N.R.; Quaresma S.; Quaresma M.C.; Frisbie-Teel J.                                                                           | C-shaped maxillary permanent first molar: A case report and literature Review                                                                                         | 2013 | Journal of Endodontics                                                                                                         |
| Zhang Q, Ou YJ, Zhang L.                                                                                                              | Curative effects of partial caries removal in permanent molars with deep dental caries                                                                                | 2017 | Shanghai Kou Qiang Yi Xue                                                                                                      |
| Surendran S.; Sivamurthy G.                                                                                                           | Current applications and future prospects of stem cells in dentistry                                                                                                  | 2015 | Dental Update                                                                                                                  |
| Dash S.; Jena D.; Jena S.P.                                                                                                           | Current status and call for action: Regenerative endodontics                                                                                                          | 2019 | Indian Journal of Public Health Research and Development                                                                       |
| Mattos J, Soares GM, Ribeiro Ade A.                                                                                                   | Current status of conservative treatment of deep carious lesions                                                                                                      | 2014 | Dent Update                                                                                                                    |
| Anand M.; Karthikeyan K.; Sekar M.                                                                                                    | Current trend of restoration of endodontically treated teeth with extensive subgingival caries: A case series                                                         | 2022 | Journal of Conservative Dentistry                                                                                              |
| Savani G.M.; Sabbah W.; Sedgley C.M.; Whitten B.                                                                                      | Current Trends in Endodontic Treatment by General Dental Practitioners: Report of a United States National Survey                                                     | 2014 | Journal of Endodontics                                                                                                         |
| do Prado M.; Alencastro F.; Athias L.; de Lima C.O.; Marion J.J.C.; Simão R.A.; Campos C.N.                                           | Current trends in irrigation among Brazilian endodontists                                                                                                             | 2018 | Dental Press Endodontics                                                                                                       |
| Malur MH, Chandra A.                                                                                                                  | Curvature height and distance of MB canal of mandibular molar with Schneider angle and its comparison with canal access angle                                         | 2018 | J Oral Biol Craniofac Res                                                                                                      |
| Scelza M.Z.; Iorio N.L.P.P.; Scelza P.; Póvoa H.C.C.; Adeodato C.S.R.; Souza A.C.N.; Batista A.C.; Tavares S.; Alves G.               | Cytocompatibility and antimicrobial activity of a novel endodontic irrigant combining citric acid and chlorhexidine                                                   | 2022 | Journal of Dentistry                                                                                                           |
| Rodríguez-Lozano F.J.; López-García S.; García-Bernal D.; Sanz J.L.; Lozano A.; Pecci-Lloret M.P.; Melo M.; López-Ginés C.; Forner L. | Cytocompatibility and bioactive properties of the new dual-curing resin-modified calcium silicate-based material for vital pulp therapy                               | 2021 | Clinical Oral Investigations                                                                                                   |
| Elsalhy M, Azizieh F, Raghupathy R.                                                                                                   | Cytokines as diagnostic markers of pulpal inflammation                                                                                                                | 2013 | Int Endod J                                                                                                                    |
| Deluca M.C.D.C.; Scarparo R.K.; Aspesi M.; Matte B.F.; Brand L.M.; Grecca F.S.; Casagrande L.; Kopper P.M.P.                          | Cytotoxic, Migration, and Angiogenic Effects of Photodynamic Therapy and Photobiomodulation Associated with a Revascularization Protocol                              | 2021 | Journal of Endodontics                                                                                                         |
| Kanjevac T.V.; Milovanović M.Z.; Milošević-Djordjević O.; Tešić Ž.; Ivanović M.; Lukić A.                                             | Cytotoxicity of glass ionomer cement on human exfoliated deciduous teeth stem cells correlates with released fluoride, strontium and aluminum ion concentrations      | 2015 | Archives of Biological Sciences                                                                                                |
| Cosme-Silva L.; Dos Santos A.F.; Lopes C.S.; Dal-Fabbro R.; Benetti F.; Gomes-Filho J.E.; Queiroz I.O.A.; Ervolino E.; Viola N.V.     | Cytotoxicity, inflammation, biomineralization, and immunoexpression of il-1 $\beta$ and tnf- $\alpha$ promoted by a new bioceramic cement                             | 2020 | Journal of Applied Oral Science                                                                                                |

|                                                                                                                      |                                                                                                                                                       |      |                                                                                     |
|----------------------------------------------------------------------------------------------------------------------|-------------------------------------------------------------------------------------------------------------------------------------------------------|------|-------------------------------------------------------------------------------------|
| Lee Y.-H.; Kim G.-E.; Song Y.-B.; Paudel U.; Lee N.-H.; Yun B.-S.; Yu M.-K.; Yi H.-K.                                | Davallialactone reduces inflammation and repairs dentinogenesis on glucose oxidase-induced stress in dental pulp cells                                | 2013 | Journal of Endodontics                                                              |
| Alqahtani Q.; Zaky S.H.; Patil A.; Beniash E.; Ray H.; Sfeir C.                                                      | Decellularized Swine Dental Pulp Tissue for Regenerative Root Canal Therapy                                                                           | 2018 | Journal of Dental Research                                                          |
| Janani K., Ajitha P., Sandhya R.                                                                                     | Decision analysis for vital pulp therapy in mature permanent teeth                                                                                    | 2020 | Indian Journal of Public Health Research and Development                            |
| Ehlinger C.; Ginies E.; Bornert F.; Bahi-Gross S.; Schmittbuhl M.; Minoux M.                                         | Decision criteria influencing the therapeutic approach to invasive cervical resorption: A case series                                                 | 2019 | Quintessence International                                                          |
| Scalzilli P.A.; Jara C.M.; Flores D.; Heinzmann D.; Figueiredo J.A.P.; Scarparo R.K.                                 | Decision-making for dental pulp exposure: a survey in graduate programs at Brazilian universities                                                     | 2022 | Brazilian oral research                                                             |
| Katri C., Sari K.-S., Eero K.                                                                                        | Deep carious lesions and their management among Finnish adolescents: a retrospective radiographic study                                               | 2022 | Clinical oral investigations                                                        |
| Tong H.J., Seremidi K., Stratigaki E., Kloukos D., Duggal M., Gizani S.                                              | Deep dentine caries management of immature permanent posterior teeth with vital pulp: A systematic review and meta-analysis                           | 2022 | Journal of dentistry                                                                |
| Zhang X.; Zhu X.; Xie Z.                                                                                             | Deep learning in cone-beam computed tomography image segmentation for the diagnosis and treatment of acute pulpitis                                   | 2022 | Journal of Supercomputing                                                           |
| Moskovitz M.; Tickotsky N.; Ashkar H.; Holan G.                                                                      | Degree of root resorption after root canal treatment with iodoform-containing filling material in primary molars                                      | 2012 | Quintessence International                                                          |
| Bertrand V., Dhenin C., Déchelotte P., Faerber M.                                                                    | Delayed avoidant restrictive food intake disorder diagnosis leading to Ogilvie's syndrome in an adolescent                                            | 2022 | Eating and Weight Disorders                                                         |
| Ramazani M, Asgary S.                                                                                                | Delayed miniature pulpotomy in a symptomatic mature molar                                                                                             | 2018 | Dent Res J (Isfahan)                                                                |
| Timmerman A.; Parashos P.                                                                                            | Delayed Root Development by Displaced Mineral Trioxide Aggregate after Regenerative Endodontics: A Case Report                                        | 2017 | Journal of Endodontics                                                              |
| Oliveira G.C.D.; Silva J.C.D.; Ionta F.Q.; Alencar C.R.B.D.; Gonçalves P.S.P.; Oliveira T.M.D.; Cruvinel T.; Rios D. | Delayed Treatment of Traumatized Primary Teeth with Distinct Pulp Response: Follow-Up until Permanent Successors Eruption                             | 2017 | Case Reports in Dentistry                                                           |
| Gandolfi M.G.; Taddei P.; Pondrelli A.; Zamparini F.; Prati C.; Spagnuolo G.                                         | Demineralization, collagen modification and remineralization degree of human dentin after EDTA and citric acid treatments                             | 2019 | Materials                                                                           |
| Liu Q.; Ma Y.; Wang J.; Zhu X.; Yang Y.; Mei Y.                                                                      | Demineralized bone matrix used for direct pulp capping in rats                                                                                        | 2017 | PLoS ONE                                                                            |
| Kularatna S.; Laloo R.; Kroon J.; Tadakamadla S.K.K.; Scuffham P.A.; Johnson N.W.                                    | Demonstration of high value care to improve oral health of a remote Indigenous community in Australia                                                 | 2020 | Health and Quality of Life Outcomes                                                 |
| Turner J.W.; Kluemper G.T.; Chance K.; Long L.S.                                                                     | Dens evaginatus: The hornet's nest of adolescent orthodontics                                                                                         | 2013 | American Journal of Orthodontics and Dentofacial Orthopedics                        |
| Ickow I.M.; Zinn S.; Stacy J.M., Jr.; Martin B.; Losee J.E.; D'Alesio A.; Soxman J.; Schuster L.A.                   | Dens Invaginatus in Patients With Cleft Lip and Palate: A Case Series                                                                                 | 2021 | Cleft Palate-Craniofacial Journal                                                   |
| Siqueira JF Jr, Rôças IN, Hernández SR, Brisson-Suárez K, Baasch AC, Pérez AR, Alves FRF.                            | Dens Invaginatus: Clinical Implications and Antimicrobial Endodontic Treatment Considerations                                                         | 2022 | J Endod                                                                             |
| Molina A, Bravo M, Fonseca GM, Márquez-Grant N, Martín-de-Las-Heras S.                                               | Dental age estimation based on pulp chamber/crown volume ratio measured on CBCT images in a Spanish population                                        | 2021 | Int J Legal Med                                                                     |
| Asif MK, Nambiar P, Mani SA, Ibrahim NB, Khan IM, Sukumaran P.                                                       | Dental age estimation employing CBCT scans enhanced with Mimics software: Comparison of two different approaches using pulp/tooth volumetric analysis | 2018 | J Forensic Leg Med                                                                  |
| Asif MK, Nambiar P, Mani SA, Ibrahim NB, Khan IM, Lokman NB.                                                         | Dental age estimation in Malaysian adults based on volumetric analysis of pulp/tooth ratio using CBCT data                                            | 2019 | Leg Med (Tokyo)                                                                     |
| Maho T, Reisz RR.                                                                                                    | Dental anatomy and replacement patterns in the early Permian stem amniote, Seymouria                                                                  | 2022 | J Anat                                                                              |
| Šembera M.; Radochová V.; Slezák R.                                                                                  | Dental and Oral Lesions in HIV-Positive Individuals in East Bohemia--Czech Republic, Single Centre Experience                                         | 2015 | Acta medica (Hradec Králové) / Universitas Carolina, Facultas Medica Hradec Králové |



|                                                                                              |                                                                                                                                                                                                                                            |      |                                                                   |
|----------------------------------------------------------------------------------------------|--------------------------------------------------------------------------------------------------------------------------------------------------------------------------------------------------------------------------------------------|------|-------------------------------------------------------------------|
| Tolibah Y.A., Kouchaji C., Lazkani T., Abbara M.T., Jbara S., Baghdadi Z.D.                  | Dental care for a child with congenital hydrocephalus: A case report with 12-month follow-up                                                                                                                                               | 2021 | International Journal of Environmental Research and Public Health |
| Costa C.P.S.; Aires B.T.C.; Thomaz E.B.A.F.; Souza S.F.C.                                    | Dental care provided to sickle cell anemia patients stratified by age: A population-based study in Northeastern Brazil                                                                                                                     | 2016 | European Journal of Dentistry                                     |
| Yani R.W.E.; Nugroho H.S.W.                                                                  | Dental caries based on dmf, sic and pufa index for people living in ampelan and ambulu village, bondowoso, indonesia                                                                                                                       | 2018 | Indian Journal of Public Health Research and Development          |
| Kuzhalvaimozhi P., Ravindran V., Subhashini V.C.                                             | Dental caries experience in patients with and without anterior crossbite: A case-control study                                                                                                                                             | 2020 | International Journal of Research in Pharmaceutical Sciences      |
| Baginska J.; Rodakowska E.; Milewski R.; Kierklo A.                                          | Dental caries in primary and permanent molars in 7-8-year-old schoolchildren evaluated with Caries Assessment Spectrum and Treatment (CAST) index                                                                                          | 2014 | BMC Oral Health                                                   |
| Turska-Szybka A.; Soika I.; Rożniatowski P.; Gozdowski D.; Olczak-Kowalczyk D.               | Dental caries severity and oral hygiene in warsaw preschool children at high risk for caries; Intensywność próchnicy i stan higieny jamy ustnej warszawskich dzieci w wieku przedszkolnym obciążonych dużym ryzykiem wystąpienia próchnicy | 2017 | Dental and Medical Problems                                       |
| Mahajan P.                                                                                   | Dental caries status and treatment needs among Tibetan refugees residing in Shimla, Himachal Pradesh, India                                                                                                                                | 2013 | International Journal of Migration, Health and Social Care        |
| Takriti M, Alhakim D, Splieth C.                                                             | Dental characteristics and according treatments of children under GA in Germany                                                                                                                                                            | 2019 | Eur Arch Paediatr Dent                                            |
| Davit-Béal T.; Gabay J.; Antonioli P.; Masle-Farquhar J.; Wolikow M.                         | Dental complications of rickets in early childhood: Case report on 2 young girls                                                                                                                                                           | 2014 | Pediatrics                                                        |
| Son K, Cho H, Kim H, Lee W, Cho M, Jeong H, Kim KH, Lee DH, Kim SY, Lee KB, Jeon M, Kim J.   | Dental diagnosis for inlay restoration using an intraoral optical coherence tomography system: A case report                                                                                                                               | 2023 | J Prosthodont Res                                                 |
| Parewe A.M.A.K.; Mahmudy W.F.; Ramdhani F.; Anggodo Y.P.                                     | Dental disease detection using hybrid fuzzy logic and evolution strategies                                                                                                                                                                 | 2018 | Journal of Telecommunication, Electronic and Computer Engineering |
| Garispe A, Sorensen C, Sorensen JR.                                                          | Dental Emergencies                                                                                                                                                                                                                         | 2023 | StatPearls                                                        |
| Ferrer Y.M.; Collazo M.E.F.; Morales D.V.; Soto A.R.; González D.L.M.                        | Dental emergencies caused by pulpar lesions; Urgencias estomatológicas por lesiones pulpares                                                                                                                                               | 2012 | Revista Cubana de Estomatologia                                   |
| Alves I.S., Vendramini D.F.V., Leite C.C., Gebrim E.M.M.S., Passos U.L.                      | Dental findings on face and neck imaging                                                                                                                                                                                                   | 2021 | Radiologia Brasileira                                             |
| Hong H.; Chen X.; Li K.; Wang N.; Li M.; Yang B.; Yu X.; Wei X.                              | Dental follicle stem cells rescue the regenerative capacity of inflamed rat dental pulp through a paracrine pathway                                                                                                                        | 2020 | Stem Cell Research and Therapy                                    |
| Brener R.; Zeitlin L.; Lebenthal Y.; Brener A.                                               | Dental health of pediatric patients with X-linked hypophosphatemia (XLH) after three years of burosumab therapy                                                                                                                            | 2022 | Frontiers in Endocrinology                                        |
| Siqueira V.D.S.; Castillo A.E.S.; Mateo-Castillo J.F.; Pinto L.D.C.; Garib D.; Pinheiro C.R. | Dental hypersensitivity in individuals with cleft lip and palate: Origin and therapies                                                                                                                                                     | 2021 | Journal of Dental Research, Dental Clinics, Dental Prospects      |
| Abuabara A.; Schramm C.A.; Zielak J.C.; Baratto-Filho F.                                     | Dental infection simulating skin lesion; Infecção dentária simulando uma lesão de pele                                                                                                                                                     | 2012 | Anais Brasileiros de Dermatologia                                 |
| Gheorghiu I.-M., Perlea P., Mitran L., Iliescu A.A., Scarlatescu S., Suciul I., Mitran M.    | Dental lesions and restorative treatment in molars                                                                                                                                                                                         | 2017 | ARS Medica Tomitana                                               |
| Jain A.; Suprabha B.S.; Rao A.                                                               | Dental management of a child patient with facial palsy: A case report; Postępowanie stomatologiczne u dziecka z porażeniem nerwu twarowego – Opis przypadku                                                                                | 2016 | Dental and Medical Problems                                       |
| Kameoka R., Kawakami T., Maeda M., Hori T., Yanagisawa A., Shirase T.                        | Dental management of a childhood cancer survivor with malformed primary teeth                                                                                                                                                              | 2020 | Pediatric Dental Journal                                          |
| Alqarni M.A., Alharbi A., Merdad L.                                                          | Dental management of a patient with 22q11.2 deletion syndrome (22q11.2DS)                                                                                                                                                                  | 2018 | BMJ Case Reports                                                  |
| Cheng F.-C.; Wang L.-H.; Ozawa N.; Wang C.-Y.; Chang J.Y.-F.; Chiang C.-P.                   | Dental manpower and treated dental diseases in department of dentistry, Taipei Hospital (the predecessor of National Taiwan University Hospital) in 1923                                                                                   | 2022 | Journal of Dental Sciences                                        |
| Ha W.N.; Kahler B.; Walsh L.J.                                                               | Dental material choices for pulp therapy in paediatric dentistry                                                                                                                                                                           | 2017 | European Endodontic Journal                                       |

|                                                                                                                                                                                                                                                      |                                                                                                                                                                                       |      |                                                          |
|------------------------------------------------------------------------------------------------------------------------------------------------------------------------------------------------------------------------------------------------------|---------------------------------------------------------------------------------------------------------------------------------------------------------------------------------------|------|----------------------------------------------------------|
| Sherene Christina Roshini A.M., Babu N.A., Krupaa R.J., Masthan K.M.K.                                                                                                                                                                               | Dental materials and its allergic reactions in dentistry— A review                                                                                                                    | 2019 | Indian Journal of Public Health Research and Development |
| Zhou Y.; Zheng L.; Zhou X.; Li J.; Xu X.                                                                                                                                                                                                             | Dental mesenchymal stem cells in inflamed microenvironment: Potentials and challenges for regeneration                                                                                | 2015 | Current Stem Cell Research and Therapy                   |
| Spiller L., Lukefahr J., Kellogg N.                                                                                                                                                                                                                  | Dental Neglect                                                                                                                                                                        | 2020 | Journal of Child and Adolescent Trauma                   |
| Kenny K.                                                                                                                                                                                                                                             | Dental pain: Highly prevalent and challenging                                                                                                                                         | 2016 | Pharmacy Times                                           |
| Miller HS, Avrahami HM, Zanno LE.                                                                                                                                                                                                                    | Dental pathologies in lamniform and carcharhiniform sharks with comments on the classification and homology of double tooth pathologies in vertebrates                                | 2022 | PeerJ                                                    |
| Inouye J.; McGrew C.                                                                                                                                                                                                                                 | Dental problems in athletes                                                                                                                                                           | 2015 | Current Sports Medicine Reports                          |
| Stephens M.B.; Wiedemer J.P.; Kushner G.M.                                                                                                                                                                                                           | Dental problems in primary care                                                                                                                                                       | 2018 | American Family Physician                                |
| Ibrahim N.A.; Azizi N.Z.; Mohd Nor N.A.                                                                                                                                                                                                              | Dental procedures and operating time under day-care general anesthesia among medically compromised and uncooperative pediatric patients                                               | 2022 | Quintessence International                               |
| Kovačič U, Tesovnik B, Molnar N, Cör A, Skalerič U, Gašperšič R.                                                                                                                                                                                     | Dental pulp and gingivomucosa in rats are innervated by two morphologically and neurochemically different populations of nociceptors                                                  | 2013 | Arch Oral Biol                                           |
| Feitosa V.P.; Mota M.N.G.; Vieira L.V.; de Paula D.M.; Gomes L.L.R.; Solheiro L.K.R.; Aguiar Neto M.A.D.; Carvalho D.A.L.; Silvestre F.A.                                                                                                            | Dental Pulp Autotransplantation: A New Modality of Endodontic Regenerative Therapy— Follow-Up of 3 Clinical Cases                                                                     | 2021 | Journal of Endodontics                                   |
| Kierdorf U.; Olsen M.T.; Kahle P.; Ludolph C.; Kierdorf H.                                                                                                                                                                                           | Dental pulp exposure, periapical inflammation and suppurative osteomyelitis of the jaws in juvenile Baltic grey seals ( <i>Halichoerus grypus grypus</i> ) from the late 19th century | 2019 | PLoS ONE                                                 |
| Renard E.; Amiaud J.; Delbos L.; Charrier C.; Montembault A.; Ducret M.; Farges J.-C.; David L.; Alliot-Licht B.; Gaudin A.                                                                                                                          | Dental pulp inflammatory/immune response to a chitosan-enriched fibrin hydrogel in the pulpotomised rat incisor                                                                       | 2020 | European Cells and Materials                             |
| Attar A.; Eslaminejad M.-B.; Tavangar M.-S.; Karamzadeh R.; Dehghani-Nazhvani A.; Ghahramani Y.; Malekmohammadi F.; Hosseini S.-M.                                                                                                                   | Dental pulp polyps contain stem cells comparable to the normal dental pulps                                                                                                           | 2014 | Journal of Clinical and Experimental Dentistry           |
| Caruso S.; Sgolastra F.; Gatto R.                                                                                                                                                                                                                    | Dental pulp regeneration in paediatric dentistry: The role of stem cells                                                                                                              | 2014 | European Journal of Paediatric Dentistry                 |
| Gomez-Sosa J.F.; Diaz-Solano D.; Wittig O.; Cardier J.E.                                                                                                                                                                                             | Dental Pulp Regeneration Induced by Allogenic Mesenchymal Stromal Cell Transplantation in a Mature Tooth: A Case Report                                                               | 2022 | Journal of Endodontics                                   |
| Kakarla P.; Avula J.S.S.; Mellela G.M.; Bandi S.; Anche S.                                                                                                                                                                                           | Dental pulp response to collagen and pulpotec cement as pulpotomy agents in primary dentition: A histological study                                                                   | 2013 | Journal of Conservative Dentistry                        |
| Covaci A., Ciocan L.T., Gălbinașu B., Bucur M.V., Matei M., Didilescu A.C.                                                                                                                                                                           | Dental Pulp Response to Different Types of Calcium-Based Materials Applied in Deep Carious Lesion Treatment— A Clinical Study                                                         | 2022 | Journal of Functional Biomaterials                       |
| Wang H.; Sun M.; Sun J.; Gong P.; Liu N.; Wang M.                                                                                                                                                                                                    | Dental Pulp Stem Cell Therapy in Ischemic Stroke: A Meta-Analysis of Preclinical Studies                                                                                              | 2022 | Journal of Stroke and Cerebrovascular Diseases           |
| Yoshimaru K.; Yamaza T.; Kajioaka S.; Sonoda S.; Yanagi Y.; Matsuura T.; Yoshizumi J.; Oda Y.; Iwata N.; Takai C.; Nakayama S.; Taguchi T.                                                                                                           | Dental pulp stem cells as a therapy for congenital enteroneuropathy                                                                                                                   | 2022 | Scientific Reports                                       |
| Iezzi I.; Cerqueni G.; Licini C.; Lucarini G.; Mattioli Belmonte M.                                                                                                                                                                                  | Dental pulp stem cells senescence and regenerative potential relationship                                                                                                             | 2019 | Journal of Cellular Physiology                           |
| Alsaeedi H.A.; Koh A.E.-H.; Lam C.; Rashid M.B.A.; Harun M.H.N.; Saleh M.F.B.M.; Teh S.W.; Luu C.D.; Ng M.H.; Isa H.M.; Leow S.N.; Then K.Y.; Bastion M.-L.C.; Mok P.L.; Muthuvenkatachalam B.S.; Samrot A.V.; Swamy K.B.; Nandakumar J.; Kumar S.S. | Dental pulp stem cells therapy overcome photoreceptor cell death and protects the retina in a rat model of sodium iodate-induced retinal degeneration                                 | 2019 | Journal of Photochemistry and Photobiology B: Biology    |
| Lan X.; Sun Z.; Chu C.; Boltze J.; Li S.                                                                                                                                                                                                             | Dental pulp stem cells: An attractive alternative for cell therapy in ischemic stroke                                                                                                 | 2019 | Frontiers in Neurology                                   |

|                                                                                                                                    |                                                                                                                                               |      |                                                                   |
|------------------------------------------------------------------------------------------------------------------------------------|-----------------------------------------------------------------------------------------------------------------------------------------------|------|-------------------------------------------------------------------|
| Lambrichts I.; Driesen R.B.; Dillen Y.; Gervois P.; Ratajczak J.; Vangansewinkel T.; Wolfs E.; Bronckaers A.; Hilken P.            | Dental Pulp Stem Cells: Their Potential in Reinnervation and Angiogenesis by Using Scaffolds                                                  | 2017 | Journal of Endodontics                                            |
| Luo L.; Xing Z.; Liao X.; Li Y.; Luo Y.; Ai Y.; He Y.; Ye Q.                                                                       | Dental pulp stem cells-based therapy for the oviduct injury via immunomodulation and angiogenesis in vivo                                     | 2022 | Cell Proliferation                                                |
| Halperson E, Moss D, Tickotsky N, Weintraub M, Moskovitz M.                                                                        | Dental pulp therapy for primary teeth in children undergoing cancer therapy                                                                   | 2014 | Pediatr Blood Cancer                                              |
| Ito T.; Kaneko T.; Sueyama Y.; Kaneko R.; Okiji T.                                                                                 | Dental pulp tissue engineering of pulpotomized rat molars with bone marrow mesenchymal stem cells                                             | 2017 | Odontology                                                        |
| Giuroiu C.L.; Căruntu I.-D.; Lozaneanu L.; Melian A.; Vataman M.; Andrian S.                                                       | Dental pulp: Correspondences and contradictions between clinical and histological diagnosis                                                   | 2015 | BioMed Research International                                     |
| Salim N.A.; ElSa'aideh B.B.; Maayta W.A.; Hassona Y.M.                                                                             | Dental services provided to Syrian refugee children in Jordan: A retrospective study                                                          | 2020 | Special Care in Dentistry                                         |
| Morón E.M.; Tomar S.L.; Souza R.; Balzer J.; Savioli C.; Shawkat S.                                                                | Dental Status and Treatment Needs of Children in Foster Care                                                                                  | 2019 | Pediatric dentistry                                               |
| Yam G.H.-F.; Peh G.S.-L.; Singhal S.; Goh B.-T.; Mehta J.S.                                                                        | Dental stem cells: A future asset of ocular cell therapy GARY HIN-KAI YAM, GARY SWEE-LIM PEH, SHWfTA SINGHAL\ BEE-UN GOH, JODHBIR S. MEHTA    | 2015 | Expert Reviews in Molecular Medicine                              |
| Picart G, Pouhaër M, Dautel A, Pérard M, Le Clerc J.                                                                               | Dental students' observations about teaching of endodontic access cavities in a French dental school                                          | 2022 | Eur J Dent Educ                                                   |
| Martín-Jiménez M.; Martín-Biedma B.; López-López J.; Alonso-Ezpeleta O.; Velasco-Ortega E.; Jiménez-Sánchez M.C.; Segura-Egea J.J. | Dental students' knowledge regarding the indications for antibiotics in the management of endodontic infections                               | 2018 | International Endodontic Journal                                  |
| Picart G.; Pouhaër M.; Dautel A.; Pérard M.; Le Clerc J.                                                                           | Dental students' observations about teaching of endodontic access cavities in a French dental school                                          | 2022 | European Journal of Dental Education                              |
| Falgás Franco J.                                                                                                                   | Dental trauma                                                                                                                                 | 2019 | Pediatrics Integral                                               |
| Elkaiali L, Ratliff K, Oueis H.                                                                                                    | Dental Treatment Considerations for Children with Complex Medical Histories: A Case of Townes-Brock Syndrome                                  | 2016 | J Mich Dent Assoc                                                 |
| Peretz B, Spierer A, Spierer S, Rakocz M.                                                                                          | Dental treatment of patients with systemic diseases compared to patients with developmental disabilities under general anesthesia             | 2012 | Spec Care Dentist                                                 |
| Loch C, Simões-Lopes PC.                                                                                                           | Dental wear in dolphins (Cetacea: Delphinidae) from southern Brazil                                                                           | 2013 | Arch Oral Biol                                                    |
| Jiang RD, Lin H, Zheng G, Yuan SP, DU Q, Zhang Y.                                                                                  | Dentin barrier cytotoxicity test with three-dimensional cell cultures                                                                         | 2015 | Beijing Da Xue Xue Bao Yi Xue Ban                                 |
| Sumidarti A.; Rovani C.A.; Nugroho J.J.; Thahir B.                                                                                 | Dentin matrix protein-1 (DMP-1) expression after application of haruan fish extract (channa striata) on inflamed wistar rat dental pulp       | 2020 | Systematic Reviews in Pharmacy                                    |
| Abd-Elmeguid A.; Yu D.C.; Kline L.W.; Moqbel R.; Vliagofitis H.                                                                    | Dentin matrix protein-1 activates dental pulp fibroblasts                                                                                     | 2012 | Journal of Endodontics                                            |
| Jayasree R, Kumar TSS, Mahalaxmi S, Abburi S, Rubaiya Y, Doble M.                                                                  | Dentin remineralizing ability and enhanced antibacterial activity of strontium and hydroxyl ion co-releasing radiopaque hydroxyapatite cement | 2017 | J Mater Sci Mater Med                                             |
| Chuang S.-F.; Chen Y.-H.; Ma P.X.; Ritchie H.H.                                                                                    | Dentin Sialoprotein/Phosphophoryn (DSP/PP) as Bio-Inductive Materials for Direct Pulp Capping                                                 | 2022 | Polymers                                                          |
| Martín-De-Llano J.J.; Mata M.; Peydró S.; Peydró A.; Carda C.                                                                      | Dentin tubule orientation determines odontoblastic differentiation in vitro: A morphological study                                            | 2019 | PLoS ONE                                                          |
| Ranjitkar S.; Yong R.; Wu I.-C.; Gully G.; Farmer D.; Watson I.; Heithersay G.                                                     | Dentinal dysplasia type 1: A 3D micro-computed tomographic study of enamel, dentine and root canal morphology                                 | 2019 | Australian Endodontic Journal                                     |
| Gupta R., Patil S., Mohite P., Gupta D., Dudulwar D.                                                                               | Dentinal Microcrack Formation by Different Rotary Endodontic File Systems: An In-vitro Study                                                  | 2022 | Journal of Clinical and Diagnostic Research                       |
| Kenchappa M.; Gupta S.; Gupta P.; Sharma P.                                                                                        | Dentine in a capsule: Clinical case reports                                                                                                   | 2015 | Journal of Indian Society of Pedodontics and Preventive Dentistry |
| Guirado E., George A.                                                                                                              | DENTINE MATRIX METALLOPROTEINASES AS POTENTIAL MEDIATORS OF DENTINE REGENERATION                                                              | 2021 | European Cells and Materials                                      |
| Okamoto M., Takahashi Y., Komichi S., Cooper P.R., Hayashi M.                                                                      | Dentinogenic effects of extracted dentin matrix components digested with matrix metalloproteinases                                            | 2018 | Scientific reports                                                |
| Tziafa C.; Koliniotou-Koumpia E.; Papadimitriou S.; Tziafas D.                                                                     | Dentinogenic responses after direct pulp capping of miniature swine teeth with Biodentine                                                     | 2014 | Journal of Endodontics                                            |

|                                                                                                                             |                                                                                                                                               |      |                                                                                                           |
|-----------------------------------------------------------------------------------------------------------------------------|-----------------------------------------------------------------------------------------------------------------------------------------------|------|-----------------------------------------------------------------------------------------------------------|
| Tziafas D.; Kodonas K.                                                                                                      | Dentinogenic specificity in the preclinical evaluation of vital pulp treatment strategies: A critical review                                  | 2015 | Dentistry Journal                                                                                         |
| Yan H, Oshima M, Raju R, Raman S, Sekine K, Waskitho A, Inoue M, Inoue M, Baba O, Morita T, Miyagi M, Matsuka Y.            | Dentin-Pulp Complex Tissue Regeneration via Three-Dimensional Cell Sheet Layering                                                             | 2021 | Tissue Eng Part C Methods                                                                                 |
| Subekti A.; Subinarto; Sariyem; Ningtyas E.A.E.                                                                             | Dentist expert system software in dental caries detection                                                                                     | 2017 | Advanced Science Letters                                                                                  |
| Crespo-Gallardo I, Martín-González J, Jiménez-Sánchez MC, Cabanillas-Balsera D, Sánchez-Domínguez B, Segura-Egea JJ.        | Dentist's knowledge, attitudes and determining factors of the conservative approach in teeth with reversible pulpitis and deep caries lesions | 2018 | J Clin Exp Dent                                                                                           |
| Li M.; Hu X.; Li X.; Lei S.; Cai M.; Wei X.; Deng D.                                                                        | Dentist-related factors influencing the use of vital pulp therapy: a survey among dental practitioners in China                               | 2019 | Journal of International Medical Research                                                                 |
| Schwendicke F, Stangvaltaite L, Holmgren C, Maltz M, Finet M, Elhennawy K, Eriksen I, Kuzmiszyn TC, Kerosuo E, Doméjean S.  | Dentists' attitudes and behaviour regarding deep carious lesion management: a multi-national survey                                           | 2017 | Clin Oral Investig                                                                                        |
| Crespo-Gallardo I.; Martín-González J.; Jiménez-Sánchez M.C.; Cabanillas-Balsera D.; Sánchez-Domínguez B.; Segura-Egea J.J. | Dentists knowledge, attitudes and determining factors of the conservative approach in teeth with reversible pulpitis and deep caries lesions  | 2018 | Journal of Clinical and Experimental Dentistry                                                            |
| Kakudate N, Yokoyama Y, Sumida F, Matsumoto Y, Gordan VV, Gilbert GH.                                                       | Dentists' practice patterns of treatment for deep occlusal caries: Findings from a dental practice-based research network                     | 2019 | J Dent                                                                                                    |
| Garrido BDTM, Vitor LLR, Cruvinel T, Machado MAAM, Oliveira TM, Lourenço Neto N.                                            | Dentists' Self-evaluated Ability in Diagnosing and Updating About Pulpotomy                                                                   | 2023 | Int Dent J                                                                                                |
| Kakudate N.; Yokoyama Y.; Sumida F.; Matsumoto Y.; Gordan V.V.; Gilbert G.H.                                                | Dentists' practice patterns of treatment for deep occlusal caries: Findings from a dental practice-based research network                     | 2019 | Journal of Dentistry                                                                                      |
| Bjørndal L, Demant S, Dabelsteen S.                                                                                         | Depth and activity of carious lesions as indicators for the regenerative potential of dental pulp after intervention                          | 2014 | J Endod                                                                                                   |
| Bitner D.P.; Feldman D.U.; Axx K.; Albandar J.M.                                                                            | Description and evaluation of an intraoral cervical plexus anesthetic technique                                                               | 2015 | Clinical Anatomy                                                                                          |
| Ajayi YO, Sofola OO.                                                                                                        | Descriptors of permanent teeth with cariously exposed pulp in patients presenting at a Nigerian hospital                                      | 2013 | Acta Odontol Scand                                                                                        |
| Pouhaër M., Picart G., Baya D., Michelutti P., Dautel A., Pérard M., Le Clerc J.                                            | Design of 3D-printed macro-models for undergraduates' preclinical practice of endodontic access cavities                                      | 2022 | European journal of dental education : official journal of the Association for Dental Education in Europe |
| Ogaya Y.; Nomura R.; Nakano K.; Watanabe Y.                                                                                 | Detection of Helicobacter pylori DNA in inflamed dental pulp specimens from Japanese children and adolescents                                 | 2015 | Journal of Medical Microbiology                                                                           |
| Yuce F, Öziç MÜ, Tassoker M.                                                                                                | Detection of pulpal calcifications on bite-wing radiographs using deep learning                                                               | 2023 | Clin Oral Investig                                                                                        |
| Lima A.R.; Herrera D.R.; Francisco P.A.; Pereira A.C.; Lemos J.; Abranches J.; Gomes B.P.F.A.                               | Detection of Streptococcus mutans in symptomatic and asymptomatic infected root canals                                                        | 2021 | Clinical Oral Investigations                                                                              |
| Contreras C, Cádiz B, Schmachtenberg O.                                                                                     | Determination of the Severity of Pulpitis by Immunohistological Analysis and Comparison with the Clinical Picture                             | 2023 | J Endod                                                                                                   |
| Park K, Ahn J, Kang S, Lee E, Kim S, Park S, Park S, Noh H, Seo K.                                                          | Determining the age of cats by pulp cavity/tooth width ratio using dental radiography                                                         | 2014 | J Vet Sci                                                                                                 |
| Anitasari S.; Wahab D.E.; Barlianta B.; Budi H.S.                                                                           | Determining the effectivity of infrared distance to eliminate dental pain due to pulpitis and periodontitis                                   | 2020 | European Journal of Dentistry                                                                             |
| El-Kishawi M.Y., Khalaf K., Odeh R.M.                                                                                       | Determining the impact of stressors on students' clinical performance in endodontics                                                          | 2021 | Journal of Taibah University Medical Sciences                                                             |
| Doğan S.; Durutürk L.; Orhan A.I.; Batmaz I.                                                                                | Determining treatability of primary teeth with pulpal exposure                                                                                | 2013 | Journal of Clinical Pediatric Dentistry                                                                   |
| Klein-Júnior C.A., Reston E., Plepis A.M., Martins V.C., Pötter I.C., Lundy F., Hentschke G.S., Hentschke V.S., Karim I.E.  | Development and evaluation of calcium hydroxide-coated, pericardium-based biomembranes for direct pulp capping                                | 2019 | Journal of Investigative and Clinical Dentistry                                                           |

|                                                                                                                                                          |                                                                                                                                                                                                                                                                                                                                                                   |      |                                                  |
|----------------------------------------------------------------------------------------------------------------------------------------------------------|-------------------------------------------------------------------------------------------------------------------------------------------------------------------------------------------------------------------------------------------------------------------------------------------------------------------------------------------------------------------|------|--------------------------------------------------|
| Moyer JK, Riccio ML, Bemis WE.                                                                                                                           | Development and microstructure of tooth histotypes in the blue shark, <i>Prionace glauca</i> (Carcharhiniformes: Carcharhinidae) and the great white shark, <i>Carcharodon carcharias</i> (Lamniformes: Lamnidae)                                                                                                                                                 | 2015 | J Morphol                                        |
| Smaïl-Faugeron V, Fron Chabouis H, Durieux P, Attal JP, Muller-Bolla M, Courson F.                                                                       | Development of a core set of outcomes for randomized controlled trials with multiple outcomes--example of pulp treatments of primary teeth for extensive decay in children                                                                                                                                                                                        | 2013 | PLoS One                                         |
| Okoro C, Vartanian A, Toussaint KC Jr.                                                                                                                   | Development of a handheld smart dental instrument for root canal imaging                                                                                                                                                                                                                                                                                          | 2016 | J Biomed Opt                                     |
| Yoneda N., Noiri Y., Matsui S., Kuremoto K., Maezono H., Ishimoto T., Nakano T., Ebisu S., Hayashi M.                                                    | Development of a root canal treatment model in the rat                                                                                                                                                                                                                                                                                                            | 2017 | Scientific reports                               |
| Roberts J.L.; Maillard J.-Y.; Waddington R.J.; Denyer S.P.; Lynch C.D.; Sloan A.J.                                                                       | Development of an ex vivo coculture system to model pulpal infection by streptococcus anginosus group bacteria                                                                                                                                                                                                                                                    | 2013 | Journal of Endodontics                           |
| Chang H.-H.; Chang Y.-J.; Yeh C.-L.; Lin T.-A.; Lin C.-P.                                                                                                | Development of calcium phosphate/calcium sulfate biphasic biomedical material with hyaluronic acid containing collagenase and simvastatin for vital pulp therapy                                                                                                                                                                                                  | 2020 | Dental Materials                                 |
| Chang K.-C.; Chang C.-C.; Chen W.-T.; Hsu C.-K.; Lin F.-H.; Lin C.-P.                                                                                    | Development of calcium phosphate/sulfate biphasic cement for vital pulp therapy                                                                                                                                                                                                                                                                                   | 2014 | Dental Materials                                 |
| Alagha A.; Nourallah A.; Alhariri S.                                                                                                                     | Dexamethasone- loaded polymeric porous sponge as a direct pulp capping agent                                                                                                                                                                                                                                                                                      | 2020 | Journal of Biomaterials Science, Polymer Edition |
| Hussien R.M.; Emam D.F.; Shoukry A.A.                                                                                                                    | Dexmedetomidine compared to ketofol for sedation in pediatric patients undergoing dental procedures: a double-blind, randomized clinical trial                                                                                                                                                                                                                    | 2022 | Anaesthesia, Pain and Intensive Care             |
| Lima S.M.F.; Grisi D.C.; Kogawa E.M.; Franco O.L.; Peixoto V.C.; Gonçalves-Júnior J.F.; Arruda M.P.; Rezende T.M.B.                                      | Diabetes mellitus and inflammatory pulpal and periapical disease: A review                                                                                                                                                                                                                                                                                        | 2013 | International Endodontic Journal                 |
| Macho Á.Z.; Ferreira A.; Rico-Romano C.; Alonso-Ezpeleta L.Ó.; Mena-Álvarez J.                                                                           | Diagnosis and endodontic treatment of type II dens invaginatus by using cone-beam computed tomography and splint guides for cavity access: A case report                                                                                                                                                                                                          | 2015 | Journal of the American Dental Association       |
| Alshaya M.S., Sabbagh H.J., El-Housseiny A.A.                                                                                                            | Diagnosis and Management Approaches for Non-cavitated Carious Dental Lesions-A Narrative Review                                                                                                                                                                                                                                                                   | 2021 | Open Dentistry Journal                           |
| Moe J.; Rajan R.; Caltharp S.; Abramowicz S.                                                                                                             | Diagnosis and Management of Children With Mycobacterium abscessus Infections in the Head and Neck                                                                                                                                                                                                                                                                 | 2018 | Journal of Oral and Maxillofacial Surgery        |
| Tanwir F, Marrone G, Tariq A, Lundborg CS.                                                                                                               | Diagnosis and prescribing pattern of antibiotics and painkillers among dentists                                                                                                                                                                                                                                                                                   | 2015 | Oral Health Prev Dent                            |
| Vigil A.; Bharathi S.                                                                                                                                    | Diagnosis of pulpitis from dental panoramic radiograph using histogram of gradients with discrete wavelet transform and multilevel neural network techniques                                                                                                                                                                                                      | 2021 | Traitement du Signal                             |
| Mejäre I.A.; Axelsson S.; Davidson T.; Frisk F.; Hakeberg M.; Kvist T.; Norlund A.; Petersson A.; Portenier I.; Sandberg H.; Tranaeus S.; Bergenholtz G. | Diagnosis of the condition of the dental pulp: A systematic review                                                                                                                                                                                                                                                                                                | 2012 | International Endodontic Journal                 |
| Janani K.; Palanivelu A.; Sandhya R.                                                                                                                     | Diagnostic accuracy of dental pulse oximeter with customized sensor holder, thermal test and electric pulp test for the evaluation of pulp vitality: An in vivo study; Precisão diagnóstica do oxímetro de pulso odontológico com suporte de sensor personalizado, teste térmico e teste elétrico da polpa para avaliação da vitalidade pulpar: Um estudo in vivo | 2020 | Brazilian Dental Science                         |
| Pourhajibagher M.; Bahador A.                                                                                                                            | Diagnostic accuracy of multiplex real-time PCR approaches compared with cultivation -based detection methods: Monitoring the endopathogenic microbiota pre and post photo-activated disinfection                                                                                                                                                                  | 2018 | Photodiagnosis and Photodynamic Therapy          |
| Sousa TO, Haitter-Neto F, Nascimento EHL, Peroni LV, Freitas DQ, Hassan B.                                                                               | Diagnostic Accuracy of Periapical Radiography and Cone-beam Computed Tomography in Identifying Root Canal Configuration of Human Premolars                                                                                                                                                                                                                        | 2017 | J Endod                                          |
| Maserat V., Ebrahimi H.S., Saberi E.A., Pirhaji A., Khosravii N.                                                                                         | Diagnostic accuracy of two conebeam computed tomography systems for detection of strip perforation in the mesial root of mandibular molars                                                                                                                                                                                                                        | 2020 | Giornale Italiano di Endodonzia                  |
| Chen M.; Zeng J.; Yang Y.; Wu B.                                                                                                                         | Diagnostic biomarker candidates for pulpitis revealed by bioinformatics analysis of merged microarray gene expression datasets                                                                                                                                                                                                                                    | 2020 | BMC Oral Health                                  |

|                                                                                                                                                                     |                                                                                                                                                                                    |      |                                             |
|---------------------------------------------------------------------------------------------------------------------------------------------------------------------|------------------------------------------------------------------------------------------------------------------------------------------------------------------------------------|------|---------------------------------------------|
| Mariona R.P., Antony S.D.P.                                                                                                                                         | Diagnostic methods for cracked tooth by two endodontic tools                                                                                                                       | 2018 | Drug Invention Today                        |
| Sharma V., Gupta N., Srivastava N., Rana V., Chandna P., Yadav S., Sharma A.                                                                                        | Diagnostic potential of inflammatory biomarkers in early childhood caries - A case control study                                                                                   | 2017 | Clinica Chimica Acta                        |
| Pasini M.; Giuca M.R.; Gatto R.; Caruso S.                                                                                                                          | Difference of Success Rates of Mineral Trioxide Aggregate Pulpotomies Performed Both by Undergraduate Dental Students and by an Expert Operator: A Retrospective Study             | 2017 | Scientific World Journal                    |
| ATES A.A.; ALOMARI T.; BHARDWAJ A.; TABNJH A.; GAMBARINI G.                                                                                                         | Differences in endodontic emergency management by endodontists and general dental practitioners in COVID-19 times                                                                  | 2020 | Brazilian Oral Research                     |
| Lan C.; Chen S.; Jiang S.; Lei H.; Cai Z.; Huang X.                                                                                                                 | Different expression patterns of inflammatory cytokines induced by lipopolysaccharides from Escherichia coli or Porphyromonas gingivalis in human dental pulp stem cells           | 2022 | BMC Oral Health                             |
| Jose J.; Ajitha P.; Subbaiyan H.                                                                                                                                    | Different treatment modalities followed by dental practitioners for Ellis class 2 fracture – a questionnaire-based survey                                                          | 2020 | Open Dentistry Journal                      |
| Kim S.-Y.; Kim S.-H.; Cho S.-B.; Lee G.-O.; Yang S.-E.                                                                                                              | Different treatment protocols for different pulpal and periapical diagnoses of 72 cracked teeth                                                                                    | 2013 | Journal of Endodontics                      |
| Germain L.                                                                                                                                                          | Differential diagnosis of toothache pain. Part I, odontogenic etiologies.                                                                                                          | 2012 | Dentistry today                             |
| Rothermund K.; Calabrese T.C.; Syed-Picard F.N.                                                                                                                     | Differential Effects of Escherichia coli– Versus Porphyromonas gingivalis–derived Lipopolysaccharides on Dental Pulp Stem Cell Differentiation in Scaffold-free Engineered Tissues | 2022 | Journal of Endodontics                      |
| Huang X.; Chen K.                                                                                                                                                   | Differential Expression of Long Noncoding RNAs in Normal and Inflamed Human Dental Pulp                                                                                            | 2018 | Journal of Endodontics                      |
| Zhong S.; Zhang S.; Bair E.; Nares S.; Khan A.A.                                                                                                                    | Differential expression of MicroRNAs in normal and inflamed human pulps                                                                                                            | 2012 | Journal of Endodontics                      |
| Yue W.; Kim S.; Jung H.-S.; Lee J.-M.; Lee S.; Kim E.                                                                                                               | Differential protein expression in human dental pulp: Comparison of healthy, inflamed, and traumatic pulp                                                                          | 2019 | Journal of Clinical Medicine                |
| Ali M.R.W.; Mustafa M.; Bårdsen A.; Gharaei M.A.; Fristad I.; Bletsa A.                                                                                             | Differential Responses of Human Dental Pulp Stromal Cells to Bioceramic Materials: A Comparative In Vitro Study                                                                    | 2021 | Journal of Contemporary Dental Practice     |
| Lim MJ, Kim JA, Choi Y, Hong CU, Min KS.                                                                                                                            | Differentiating spontaneous vertical root fracture in endodontically treated tooth                                                                                                 | 2017 | Eur J Dent                                  |
| Zhang L.; Yu Y.; Joubert C.; Bruder G.; Liu Y.; Chang C.-C.; Simon M.; Walker S.G.; Rafailovich M.                                                                  | Differentiation of dental pulp stem cells on Gutta-percha scaffolds                                                                                                                | 2016 | Polymers                                    |
| Gonmanee T.; Thonabulsombat C.; Vongsavan K.; Sritanaudomchai H.                                                                                                    | Differentiation of stem cells from human deciduous and permanent teeth into spiral ganglion neuron-like cells                                                                      | 2018 | Archives of Oral Biology                    |
| Alex G.                                                                                                                                                             | Direct and Indirect Pulp Capping: A Brief History, Material Innovations, and Clinical Case Report                                                                                  | 2018 | Compend Contin Educ Dent                    |
| Kanada S.; Makino E.; Nakamura N.; Miyabe M.; Ito M.; Hata M.; Yamauchi T.; Sawada N.; Kondo S.; Saiki T.; Minato T.; Miyazawa K.; Goto S.; Matsubara T.; Naruse K. | Direct comparison of therapeutic effects on diabetic polyneuropathy between transplantation of dental pulp stem cells and administration of dental pulp stem cell-secreted factors | 2020 | International Journal of Molecular Sciences |
| Ali H, Raslan N.                                                                                                                                                    | Direct pulp capping (DPC) in primary molars using (3Mix-MP) and the characteristics of the carious lesion as predictor factors for its success: a randomized controlled trial      | 2021 | Eur Arch Paediatr Dent                      |
| Chatzidimitriou K, Vadiakas G, Koletsis D.                                                                                                                          | Direct pulp capping in asymptomatic carious primary molars using three different pulp capping materials: a prospective clinical trial                                              | 2022 | Eur Arch Paediatr Dent                      |
| Kotsanos N, Arapostathis KN, Arhakis A, Menexes G.                                                                                                                  | Direct pulp capping of carious primary molars. A specialty practice based study                                                                                                    | 2014 | J Clin Pediatr Dent                         |
| Friedlander L.; Mcelroy K.; Daniel B.; Cullinan M.; Hanlin S.                                                                                                       | Direct pulp capping of permanent teeth in New Zealand general dental practice- A practice based research study                                                                     | 2015 | New Zealand Dental Journal                  |
| Dimitraki D.; Papageorgiou S.N.; Kotsanos N.                                                                                                                        | Direct pulp capping versus pulpotomy with MTA for carious primary molars: a randomised clinical trial                                                                              | 2019 | European Archives of Paediatric Dentistry   |
| Brodén J, Heimdahl H, Josephsson O, Fransson H.                                                                                                                     | Direct pulp capping versus root canal treatment in young permanent vital teeth with pulp exposure due to caries. A systematic review                                               | 2016 | Am J Dent                                   |

|                                                                                                                                                            |                                                                                                                                                                                     |      |                                                            |
|------------------------------------------------------------------------------------------------------------------------------------------------------------|-------------------------------------------------------------------------------------------------------------------------------------------------------------------------------------|------|------------------------------------------------------------|
| Ahlawat M, Grewal MS, Goel M, Bhullar HK, Saurabh, Nagpal R.                                                                                               | Direct Pulp Capping with Mineral Trioxide Aggregate and Biodentine in Cariously Exposed Molar Teeth: 1-Year Follow-up - An In vivo Study                                            | 2022 | J Pharm Bioallied Sci                                      |
| Ahlawat M., Grewal M.S., Goel M., Bhullar H.K., Saurabh, Nagpal R.                                                                                         | Direct pulp capping with mineral trioxide aggregate and biodentine in cariously exposed molar teeth: 1-year follow-up-An in vivo study                                              | 2022 | Journal of Pharmacy and Bioallied Sciences                 |
| Kermanshah H, Ranjbar Omrani L, Ghabraei S, Fekrazad R, Daneshparvar N, Bagheri P.                                                                         | Direct Pulp Capping With ProRoot MTA Alone and in Combination With Er:YAG Laser Irradiation: A Clinical Trial                                                                       | 2020 | J Lasers Med Sci                                           |
| Paula A.; Carrilho E.; Laranjo M.; Abrantes A.M.; Casalta-Lopes J.; Botelho M.F.; Marto C.M.; Ferreira M.M.                                                | Direct pulp capping: Which is the most effective biomaterial? A retrospective clinical study                                                                                        | 2019 | Materials                                                  |
| Bosch B.M.; Salero E.; Núñez-Toldrà R.; Sabater A.L.; Gil F.J.; Perez R.A.                                                                                 | Discovering the Potential of Dental Pulp Stem Cells for Corneal Endothelial Cell Production: A Proof of Concept                                                                     | 2021 | Frontiers in Bioengineering and Biotechnology              |
| Cankar K.; Nemeth L.; Bajd F.; Vidmar J.; Serša I.                                                                                                         | Discrimination between intact and decayed pulp regions in carious teeth by ADC mapping                                                                                              | 2014 | Caries Research                                            |
| Khaladkar S.M., Reddy B.N.                                                                                                                                 | Displaced root of 3(rd)maxillary molar tooth into infratemporal fossa- role of 3D CT scan                                                                                           | 2020 | Journal of Clinical and Diagnostic Research                |
| Kim J.-H.; Jeon M.; Song J.-S.; Lee J.-H.; Choi B.-J.; Jung H.-S.; Moon S.J.; DenBesten P.K.; Kim S.-O.                                                    | Distinctive genetic activity pattern of the human dental pulp between deciduous and permanent teeth                                                                                 | 2014 | PLoS ONE                                                   |
| Moraes LC, Só MV, Dal Pizzol Tda S, Ferreira MB, Montagner F.                                                                                              | Distribution of genes related to antimicrobial resistance in different oral environments: a systematic review                                                                       | 2015 | J Endod                                                    |
| Shrestha R., Srii R., Shrestha D.                                                                                                                          | Diversity of root canal morphology in mandibular first premolar                                                                                                                     | 2019 | Kathmandu University Medical Journal                       |
| Wang X.; Feng Z.; Li Q.; Yi B.; Xu Q.                                                                                                                      | DNA methylcytosine dioxygenase ten-eleven translocation 2 enhances lipopolysaccharide-induced cytokine expression in human dental pulp cells by regulating MyD88 hydroxymethylation | 2018 | Cell and Tissue Research                                   |
| Nowak A.J.; Casamassimo P.S.; Scott J.; Moulton R.                                                                                                         | Do early dental visits reduce treatment and treatment costs for children?                                                                                                           | 2014 | Pediatric Dentistry                                        |
| Fowler S.; Fullmer S.; Drum M.; Reader A.                                                                                                                  | Does acetaminophen/hydrocodone affect cold pulpal testing in patients with symptomatic irreversible pulpitis? A prospective, randomized, double-blind, placebo-controlled study     | 2014 | Journal of Endodontics                                     |
| da Silva B.S., Nicoloso G.F., Ruiz L.F., de Melo T.A.F., Casagrande L.                                                                                     | Does endodontic Re-treatment in primary teeth increase the functional tooth retention? A clinical, retrospective, university-based study                                            | 2019 | Pesquisa Brasileira em Odontopediatria e Clínica Integrada |
| Vitor L.L.R.; Prado M.T.O.; Lourenço Neto N.; Oliveira R.C.; Sakai V.T.; Santos C.F.; Dionísio T.J.; Rios D.; Cruvinel T.; Machado M.A.A.M.; Oliveira T.M. | Does photobiomodulation change the synthesis and secretion of angiogenic proteins by different pulp cell lineages?                                                                  | 2020 | Journal of Photochemistry and Photobiology B: Biology      |
| Kuharattanachai K, Rangsi W, Jotikasthira D, Khemalelakul W, Tripuwabhut K.                                                                                | Does pulp cavity affect the center of resistance in three-dimensional tooth model? A finite element method study                                                                    | 2022 | Clin Oral Investig                                         |
| Rabello D.G.D.; Corazza B.J.M.; Ferreira L.L.; Santamaria M.P.; Gomes A.P.M.; Martinho F.C.                                                                | Does supplemental photodynamic therapy optimize the disinfection of bacteria and endotoxins in one-visit and two-visit root canal therapy? A randomized clinical trial              | 2017 | Photodiagnosis and Photodynamic Therapy                    |
| Franceschi D.; Prato G.P.P.; Gianfilippo R.D.                                                                                                              | Double Connective Tissue Graft to Treat Deep Coronal-Radicular Abrasion: A 19-Year Follow-Up Case Report                                                                            | 2021 | Clinical advances in periodontics                          |
| Ke Z.; Qiu Z.; Xiao T.; Zeng J.; Zou L.; Lin X.; Hu X.; Lin S.; Lv H.                                                                                      | Downregulation of miR-224-5p promotes migration and proliferation in human dental pulp stem cells                                                                                   | 2019 | BioMed Research International                              |
| Lee S.; Zhang Q.Z.; Karabucak B.; Le A.D.                                                                                                                  | DPSCs from inflamed pulp modulate macrophage function via the TNF- $\alpha$ /IDO axis                                                                                               | 2016 | Journal of Dental Research                                 |
| Al-Rashdi M.S.; Bakathir A.; Al Balushi K.A.                                                                                                               | Drug prescribing practices in dental care patients at a dental and maxillofacial surgery clinic in Oman                                                                             | 2020 | Oman Medical Journal                                       |
| Birjandi AA, Suzano FR, Sharpe PT.                                                                                                                         | Drug Repurposing in Dentistry; towards Application of Small Molecules in Dentin Repair                                                                                              | 2020 | Int J Mol Sci                                              |
| Huang C.-C., Narayanan R., Warshawsky N., Ravindran S.                                                                                                     | Dual ECM biomimetic scaffolds for dental pulp regenerative applications                                                                                                             | 2018 | Frontiers in Physiology                                    |
| Dai Y.; Xuan G.; Yin M.                                                                                                                                    | DUXAP8 Promotes LPS-Induced Cell Injury in Pulpitis by Regulating miR-18b-5p/HIF3A                                                                                                  | 2022 | International Dental Journal                               |

|                                                                                                                                                                             |                                                                                                                                                                                            |      |                                                                   |
|-----------------------------------------------------------------------------------------------------------------------------------------------------------------------------|--------------------------------------------------------------------------------------------------------------------------------------------------------------------------------------------|------|-------------------------------------------------------------------|
| Marugina T.L.; Levenets A.A.; Kiprin D.V.; Cherevatenko A.I.                                                                                                                | Dynamic evaluation of the effectiveness of the use of sealers in the preparation of root canals for orthopedic restoration of teeth                                                        | 2020 | Siberian Journal of Life Sciences and Agriculture                 |
| Kwon SR, Li Y, Oyoyo U, Aprecio RM.                                                                                                                                         | Dynamic model of hydrogen peroxide diffusion kinetics into the pulp cavity                                                                                                                 | 2012 | J Contemp Dent Pract                                              |
| Leontiev W, Connert T, Weiger R, Krastl G, Magni E.                                                                                                                         | Dynamic Navigation in Endodontics: Guided Access Cavity Preparation by Means of a Miniaturized Navigation System                                                                           | 2022 | J Vis Exp                                                         |
| Huang J.; Lv Y.; Fu Y.; Ren L.; Wang P.; Liu B.; Huang K.; Bi J.                                                                                                            | Dynamic Regulation of Delta-Opioid Receptor in Rat Trigeminal Ganglion Neurons by Lipopolysaccharide-induced Acute Pulpitis                                                                | 2015 | Journal of Endodontics                                            |
| Papi P., Pranno N., Di Murro B., Pompa G.                                                                                                                                   | Early implant placement and peri-implant augmentation with a porcine-derived acellular dermal matrix and synthetic bone in the aesthetic area: a 2-year follow-up prospective cohort study | 2021 | International Journal of Oral and Maxillofacial Surgery           |
| Paudel U.; Lee Y.-H.; Kwon T.-H.; Park N.-H.; Yun B.-S.; Hwang P.-H.; Yi H.-K.                                                                                              | Eckols reduce dental pulp inflammation through the ERK1/2 pathway independent of COX-2 inhibition                                                                                          | 2014 | Oral Diseases                                                     |
| Takahashi N, Nyvad B.                                                                                                                                                       | Ecological Hypothesis of Dentin and Root Caries                                                                                                                                            | 2016 | Caries Res                                                        |
| Deery C.                                                                                                                                                                    | Editorial: is there a place for the formocresol pulpotomy? Indirect pulp capping, the real alternative                                                                                     | 2014 | Int J Paediatr Dent                                               |
| Chu T.; Ni X.; Zhu Y.                                                                                                                                                       | EDTA Combined with C-Pilot Files and Microultrasound for Root Canal Calcification: Dredging Effect and Safety Analysis                                                                     | 2022 | Computational and Mathematical Methods in Medicine                |
| Tziafas D, Kodonas K, Gogos C, Tziafa C, Papadimitriou S.                                                                                                                   | EDTA conditioning of circum-pulpal dentine induces dentinogenic events in pulp-tomized miniature swine teeth                                                                               | 2019 | Int Endod J                                                       |
| Martínez-Herrera A.; Pozos-Guillén A.; Ruiz-Rodríguez S.; Garrocho-Rangel A.; Vértiz-Hernández A.; Escobar-García D.M.                                                      | Effect of 4-Allyl-1-hydroxy-2-methoxybenzene (Eugenol) on Inflammatory and Apoptosis Processes in Dental Pulp Fibroblasts                                                                  | 2016 | Mediators of Inflammation                                         |
| Selvan P.; Malathi; Rajan R.                                                                                                                                                | Effect of 4-allyl-2-methoxyphenol (eugenol) on motor co-ordination in subacute restraint stress induced wistar albino rats                                                                 | 2016 | Journal of Applied Pharmaceutical Science                         |
| Al-Shamma A.M.W.; Al-Hijazi A.Y.; Hasan D.M.                                                                                                                                | Effect of A 1 in Traumatic Pulp of Osteoporotic Rat                                                                                                                                        | 2020 | Systematic Reviews in Pharmacy                                    |
| Edanami N.; Ibn Belal R.S.; Yoshida K.; Yoshida N.; Ohkura N.; Takenaka S.; Noiri Y.                                                                                        | Effect of a resin-modified calcium silicate cement on inflammatory cell infiltration and reparative dentin formation after pulpotomy in rat molars                                         | 2022 | Australian Endodontic Journal                                     |
| Gulzar R.; Ajitha P.; Subbaiyan H.                                                                                                                                          | Effect of addition of bismuth oxide, zirconium oxide nanoparticles and niobium oxide nanoparticles to portland cement on the proliferation and migration of dental pulp stem cells         | 2021 | International Journal of Dentistry and Oral Science               |
| Yousaf A., Ali F., Bhanger F., Alam M.                                                                                                                                      | Effect of apical patency on postoperative pain after single-visit endodontic treatment in necrotic teeth with asymptomatic apical periodontitis: A randomised control trial                | 2021 | Journal of the College of Physicians and Surgeons Pakistan        |
| BinMahfooz A.M.; Sindi M.A.; Alsohaibi T.H.; Jabbad H.H.; Johar A.O.                                                                                                        | Effect of Apical Root Canal Perforation Size on Push-out Bond Strength of Glass Fiber Dowels                                                                                               | 2020 | Journal of Contemporary Dental Practice                           |
| Wang L., Xie X., Weir M.D., Fouad A.F., Zhao L., Xu H.H.K.                                                                                                                  | Effect of bioactive dental adhesive on periodontal and endodontic pathogens                                                                                                                | 2016 | Journal of Materials Science: Materials in Medicine               |
| Washio A.; Miura H.; Morotomi T.; Ichimaru-Suematsu M.; Miyahara H.; Hanada-Miyahara K.; Yoshii S.; Murata K.; Takakura N.; Akao E.; Fujimoto M.; Matsuyama A.; Kitamura C. | Effect of bioactive glass-based root canal sealer on the incidence of postoperative pain after root canal obturation                                                                       | 2020 | International Journal of Environmental Research and Public Health |
| Mushtaq A.; Goswami M.; Rahman B.; Sharan S.                                                                                                                                | Effect of calcium silicate cements on vascular endothelial growth factor release from platelet-rich fibrin and its architectural changes                                                   | 2021 | World Journal of Dentistry                                        |
| Sharma P.; Garg S.; Dhindsa A.; Jain N.; Joshi S.; Gupta A.                                                                                                                 | Effect of chlorhexidine gluconate as hemostatic agent in healing and repair after mineral trioxide aggregate vital pulp therapy in young permanent teeth - A clinical study                | 2021 | Indian Journal of Physiology and Pharmacology                     |
| Raouf M.; Ashrafganjoui E.; Kooshki R.; Abbasnejad M.; Haghani J.; Amanpour S.; Zarei M.-R.                                                                                 | Effect of chronic stress on capsaicin-induced dental nociception in a model of pulpitis in rats                                                                                            | 2018 | Archives of Oral Biology                                          |
| Minhoto GB, Khoury RD, Orozco EIF, Prado RF, Valera MC.                                                                                                                     | Effect of chronic unpredictable stress on the progression of experimental apical periodontitis in rats                                                                                     | 2021 | Int Endod J                                                       |



|                                                                                                                                                                           |                                                                                                                                                                                                                   |      |                                                     |
|---------------------------------------------------------------------------------------------------------------------------------------------------------------------------|-------------------------------------------------------------------------------------------------------------------------------------------------------------------------------------------------------------------|------|-----------------------------------------------------|
| Kirmizibekmez Ö., Karataş E., Topçuoğlu H.S.                                                                                                                              | Effect of continuous irrigation on apical transportation, centering ability and volume of removed dentin in curved root canals: a micro computed tomography study                                                 | 2022 | Giornale Italiano di Endodonzia                     |
| Shi X.; Li Z.; He Y.; Jiang Q.; Yang X.                                                                                                                                   | Effect of different dental burs for experimental induction of pulpitis in mice                                                                                                                                    | 2017 | Archives of Oral Biology                            |
| Lai H.; Lin X.; Zhang Y.; Gong Q.; Tong Z.                                                                                                                                | Effect of different endodontic access preparations on the biomechanical behavior of lithium disilicate and resin nanoceramic onlay restorations: An in vitro and 3D finite element analysis study                 | 2022 | Journal of Prosthetic Dentistry                     |
| Bhandi S.; Patil S.; Boreak N.; Chohan H.; Abumelha A.S.; Alkahtany M.F.; Almadi K.H.; Vinothkumar T.S.; Raj A.T.; Testarelli L.                                          | Effect of Different Intracanal Medicaments on the Viability and Survival of Dental Pulp Stem Cells                                                                                                                | 2022 | Journal of Personalized Medicine                    |
| Al Qahtani M., Haralur S.B., Alqahtani M.A., Assiri A.K., Alqahtani A.S.                                                                                                  | Effect of different surface treatment on the push out bond strength of polyether ether ketone endodontic post                                                                                                     | 2018 | Journal of Biomaterials and Tissue Engineering      |
| Chang C.-C.; Yeh C.-L.; Chang H.-H.; Kuo Y.-F.; Huang P.-Y.; Lin C.-P.                                                                                                    | Effect of different zinc concentrations on partially-stabilized cement for vital pulp therapy                                                                                                                     | 2019 | Journal of the Formosan Medical Association         |
| Falkensammer F.; Schaden W.; Krall C.; Freudenthaler J.; Bantleon H.-P.                                                                                                   | Effect of extracorporeal shockwave therapy (ESWT) on pulpal blood flow after orthodontic treatment: a randomized clinical trial                                                                                   | 2016 | Clinical Oral Investigations                        |
| Sarra G.; Machado M.E.D.L.; Caballero-Flores H.V.; Moreira M.S.; Pedroni A.C.F.; Marques M.M.                                                                             | Effect of human dental pulp stem cell conditioned medium in the dentin-pulp complex regeneration: A pilot in vivo study                                                                                           | 2021 | Tissue and Cell                                     |
| Read J.K.; McClanahan S.B.; Khan A.A.; Lunos S.; Bowles W.R.                                                                                                              | Effect of ibuprofen on masking endodontic diagnosis                                                                                                                                                               | 2014 | Journal of Endodontics                              |
| Alshatrat S.M.; Sabarini J.M.; Hammouri H.M.; Al-Bakri I.A.; Al-Omari W.M.                                                                                                | Effect of immersive virtual reality on pain in different dental procedures in children: A pilot study                                                                                                             | 2022 | International Journal of Paediatric Dentistry       |
| Farhad A.; Razavian H.; Shafiee M.                                                                                                                                        | Effect of intraosseous injection versus inferior alveolar nerve block as primary pulpal anaesthesia of mandibular posterior teeth with symptomatic irreversible pulpitis: a prospective randomized clinical trial | 2018 | Acta Odontologica Scandinavica                      |
| Kwon SR, Oyoyo U, Li Y.                                                                                                                                                   | Effect of light activation on tooth whitening efficacy and hydrogen peroxide penetration: an in vitro study                                                                                                       | 2013 | J Dent                                              |
| de Santana D.A.; Fonseca G.F.; Ramalho L.M.P.; Rodriguez T.T.; Aguiar M.C.                                                                                                | Effect of low-level laser therapy (λ780 nm) on the mechanically damaged dentin-pulp complex in a model of extrusive luxation in rat incisors                                                                      | 2017 | Lasers in Medical Science                           |
| Vera J.; Hernández E.M.; Romero M.; Arias A.; Van Der Sluis L.W.M.                                                                                                        | Effect of maintaining apical patency on irrigant penetration into the apical two millimeters of large root canals: An in vivo study                                                                               | 2012 | Journal of Endodontics                              |
| Olatosi O.O., Sote E.O., Orenuga O.O.                                                                                                                                     | Effect of mineral trioxide aggregate and formocresol pulpotomy on vital primary teeth: a clinical and radiographic study                                                                                          | 2015 | Nigerian journal of clinical practice               |
| Liu L.; Shu S.; Cheung G.S.; Wei X.                                                                                                                                       | Effect of miR-146a/bFGF/PEG-PEI Nanoparticles on Inflammation Response and Tissue Regeneration of Human Dental Pulp Cells                                                                                         | 2016 | BioMed Research International                       |
| Shafiei F, Dehghani Z, Tavangar MS.                                                                                                                                       | Effect of natural antioxidants on bond strength recovery of resin-modified glass ionomers to the NaOCl-affected pulp chamber dentin                                                                               | 2023 | Clin Exp Dent Res                                   |
| Stanley W.; Drum M.; Nusstein J.; Reader A.; Beck M.                                                                                                                      | Effect of nitrous oxide on the efficacy of the inferior alveolar nerve block in patients with symptomatic irreversible pulpitis                                                                                   | 2012 | Journal of Endodontics                              |
| Ribeiro-Santos F.R.; Arnez M.F.M.; de Carvalho M.S.; da Silva R.A.B.; Politi M.P.L.; de Queiroz A.M.; Nelson-Filho P.; da Silva L.A.B.; Faccioli L.H.; Paula-Silva F.W.G. | Effect of non-steroidal anti-inflammatory drugs on pulpal and periapical inflammation induced by lipopolysaccharide                                                                                               | 2021 | Clinical Oral Investigations                        |
| Wanachottrakul N.; Chotigeat W.; Kedjarune-Leggat U.                                                                                                                      | Effect of novel chitosan-fluoroaluminosilicate resin modified glass ionomer cement supplemented with translationally controlled tumor protein on pulp cells                                                       | 2014 | Journal of Materials Science: Materials in Medicine |
| Vianna E.C.B.; Herkrath F.J.; Martins I.E.B.; Lopes L.P.B.; Marques A.A.F.; Júnior E.C.S.                                                                                 | Effect of occlusal adjustment on postoperative pain after root canal treatment: A randomized clinical trial                                                                                                       | 2020 | Brazilian Dental Journal                            |
| Parirokh M.; Rekabi A.R.; Ashouri R.; Nakhaee N.; Abbott P.V.; Gorjestani H.                                                                                              | Effect of occlusal reduction on postoperative pain in teeth with irreversible pulpitis and mild tenderness to percussion                                                                                          | 2013 | Journal of Endodontics                              |

|                                                                                                                                                 |                                                                                                                                                                                                                  |      |                                                    |
|-------------------------------------------------------------------------------------------------------------------------------------------------|------------------------------------------------------------------------------------------------------------------------------------------------------------------------------------------------------------------|------|----------------------------------------------------|
| Yildirim M.D.; Cantekin K.                                                                                                                      | Effect of palonosetron on postoperative nausea and vomiting in children following dental rehabilitation under general anesthesia                                                                                 | 2014 | Pediatric dentistry                                |
| Günaydin A.; Çakırcı E.B.                                                                                                                       | Effect of Photobiomodulation Therapy following Direct Pulp Capping on Postoperative Sensitivity by Thermal Stimulus: A Retrospective Study                                                                       | 2021 | Medical Principles and Practice                    |
| Tennert C.; Feldmann K.; Haamann E.; Al-Ahmad A.; Folio M.; Wrbas K.-T.; Hellwig E.; Altenburger M.J.                                           | Effect of photodynamic therapy (PDT) on Enterococcus faecalis biofilm in experimental primary and secondary endodontic infections                                                                                | 2014 | BMC Oral Health                                    |
| Strazzi Sahyon H.B.; Pereira da Silva P.; Silva de Oliveira M.; Angelo Cintra L.T.; Gomes-Filho J.E.; Henrique dos Santos P.; Sivieri-Araujo G. | Effect of photodynamic therapy on the mechanical properties and bond strength of glass-fiber posts to endodontically treated intraradicular dentin                                                               | 2018 | Journal of Prosthetic Dentistry                    |
| Shahi S.; Mokhtari H.; Rahimi S.; Yavari H.R.; Narimani S.; Abdolrahimi M.; Nezafati S.                                                         | Effect of premedication with ibuprofen and dexamethasone on success rate of inferior alveolar nerve block for teeth with asymptomatic irreversible pulpitis: A randomized clinical trial                         | 2013 | Journal of Endodontics                             |
| Suresh N.; Nagendrababu V.; Koteeswaran V.; Hariitha J.S.; Swetha S.D.; Varghese A.; Natanasabapathy V.                                         | Effect of preoperative oral administration of steroids in comparison to an anti-inflammatory drug on postoperative pain following single-visit root canal treatment – a double-blind, randomized clinical trial  | 2021 | International Endodontic Journal                   |
| Ahangari Z.; Naseri M.; Jalili M.; Mansouri Y.; Mashhadiabbas F.; Torkaman A.                                                                   | Effect of propolis on dentin regeneration and the potential role of dental pulp stem cell in guinea pigs                                                                                                         | 2012 | Cell Journal                                       |
| Wayne JS, Chande R, Porter HC, Janus C.                                                                                                         | Effect of restoration volume on stresses in a mandibular molar: a finite element study                                                                                                                           | 2014 | J Prosthet Dent                                    |
| Stähli A, Schatt ASJ, Stoffel M, Nietzsche S, Sculean A, Gruber R, Cvikl B, Eick S.                                                             | Effect of scaling on the invasion of oral microorganisms into dentinal tubules including the response of pulpal cells-an in vitro study                                                                          | 2021 | Clin Oral Investig                                 |
| Kolhe P.S., Kolhe S.J., Khiyani T.S., Solanki H., Desai U.H., Chavda S.                                                                         | Effect of silver diamine fluoride as indirect pulp capping agent in permanent dentition                                                                                                                          | 2022 | NeuroQuantology                                    |
| Ahsana A.; Gurunathan D.                                                                                                                        | Effect of silver diamine fluoride treatment on the quality of life of children                                                                                                                                   | 2020 | Indian Journal of Forensic Medicine and Toxicology |
| Saatchi M, Farhad AR, Shenasa N, Haghighi SK.                                                                                                   | Effect of Sodium Bicarbonate Buccal Infiltration on the Success of Inferior Alveolar Nerve Block in Mandibular First Molars with Symptomatic Irreversible Pulpitis: A Prospective, Randomized Double-blind Study | 2016 | J Endod                                            |
| Rayyan A.; Ather A.; Hargreaves K.M.; Ruparel N.B.                                                                                              | Effect of Sodium Hypochlorite in Dental Unit Waterline on Aerosolized Bacteria Generated from Endodontic Procedures                                                                                              | 2022 | Journal of Endodontics                             |
| Queiroz A.F.; Hidalgo M.M.; Consolaro A.; Panzarini S.; França A.B.; Melo M.E.; Poi W.                                                          | Effect of systemic antibiotic therapy on pulp repair following extrusive luxation and avulsion in a murine model: A histomorphological study                                                                     | 2022 | Dental Traumatology                                |
| Kim E.-C.; Park H.; Lee S.-I.; Kim S.-Y.                                                                                                        | Effect of the Acidic Dental Resin Monomer 10-methacryloyloxydecyl Dihydrogen Phosphate on Odontoblastic Differentiation of Human Dental Pulp Cells                                                               | 2015 | Basic and Clinical Pharmacology and Toxicology     |
| Kabil NS, Badran AS, Wassel MO.                                                                                                                 | Effect of the addition of chlorhexidine and miswak extract on the clinical performance and antibacterial properties of conventional glass ionomer: an in vivo study                                              | 2017 | Int J Paediatr Dent                                |
| Chunhacheevachaloke E, Tanapitchpong R, Ajcharanukul O.                                                                                         | Effect of the pulpal hydrostatic pressure on the morphological data of the fluid droplets emerging from dental enamel in human teeth                                                                             | 2020 | Data Brief                                         |
| Gupta S.; Tewari S.; Tewari S.; Mittal S.                                                                                                       | Effect of time lapse between endodontic and periodontal therapies on the healing of concurrent endodontic-periodontal lesions without communication: A prospective randomized clinical trial                     | 2015 | Journal of Endodontics                             |
| Okamoto M, Takahashi Y, Komichi S, Ali M, Watanabe M, Hayashi M.                                                                                | Effect of tissue inhibitor of metalloprotease 1 on human pulp cells in vitro and rat pulp tissue in vivo                                                                                                         | 2019 | Int Endod J                                        |
| Chang K.-C.; Chang C.-C.; Huang Y.-C.; Chen M.-H.; Lin F.-H.; Lin C.-P.                                                                         | Effect of tricalcium aluminate on the physicochemical properties, bioactivity, and biocompatibility of partially stabilized cements                                                                              | 2014 | PLoS ONE                                           |
| Prasanti E.D.; Margono A.; Djauharie N.                                                                                                         | Effect of triple antibiotic paste, calcium hydroxide, ledermix® on viability of pulp mesenchymal stem cells                                                                                                      | 2019 | International Journal of Applied Pharmaceutics     |
| Patil A., Sangle P., Sumanthini M.V., Satpute T., Naik D., Ghosh A.                                                                             | Effect of Various Concentrations of Sodium Hypochlorite on the Microhardness of Bulk-fill Restorative Composite Resin used as a Pre-endodontic Restoration                                                       | 2022 | Journal of Clinical and Diagnostic Research        |

|                                                                                                                                 |                                                                                                                                                                                             |      |                                                     |
|---------------------------------------------------------------------------------------------------------------------------------|---------------------------------------------------------------------------------------------------------------------------------------------------------------------------------------------|------|-----------------------------------------------------|
| Danesh F.; Vahid A.; Jahanbani J.; Mashhadiabbas F.; Arman E.                                                                   | Effect of white mineral trioxide aggregate compared with biomimetic carbonated apatite on dentine bridge formation and inflammatory response in a dental pulp model                         | 2012 | International Endodontic Journal                    |
| Kara Tuncer A.; Gerek M.                                                                                                        | Effect of working length measurement by electronic apex locator or digital radiography on postoperative pain: A randomized clinical trial                                                   | 2014 | Journal of Endodontics                              |
| Jing Q, Wan K, Wang XJ, Ma L.                                                                                                   | Effectiveness and safety of computer-controlled periodontal ligament injection system in endodontic access to the mandibular posterior teeth                                                | 2014 | Chin Med Sci J                                      |
| Batig V.M.; Borysenko A.V.; Prodanchuk A.I.; Hlushchenko T.A.; Kilmukhametova Y.H.; Batih I.V.; Tokar O.M.                      | Effectiveness of endodontic treatment in patients with generalized periodontitis with prevention of parasympathetic nervous system reactions                                                | 2020 | Romanian Journal of Stomatology                     |
| Marques-da-Silva B., Alberton C.S., Tomazinho F.S.F., Gabardo M.C.L., Duarte M.A.H., Vivan R.R., Baratto-Filho F.               | Effectiveness of five instruments when removing calcium hydroxide paste from simulated internal root resorption cavities in extracted maxillary central incisors                            | 2020 | International endodontic journal                    |
| Jayaraman J., Nagendrababu V., Pulikkotil S.J., Veettil S.K., Dhar V.                                                           | Effectiveness of formocresol and ferric sulfate as pulpotomy material in primary molars: A systematic review and meta-analysis with trial sequential analysis of randomized clinical trials | 2020 | Quintessence International                          |
| Tanwir A.; Ahmed S.; Akhtar H.; Wahid U.; Abbasi M.S.; Ahmed N.                                                                 | Effectiveness of Single Dose Premedication of Piroxicam and Prednisolone on Post Endodontic Pain in One Visit Root Canal Treatment: A Randomized Clinical Trial                             | 2022 | European Endodontic Journal                         |
| BaniHani A, Deery C, Toumba J, Duggal M.                                                                                        | Effectiveness, Costs and Patient Acceptance of a Conventional and a Biological Treatment Approach for Carious Primary Teeth in Children                                                     | 2019 | Caries Res                                          |
| Li W.; Yang H.; Gong Y.; Wang S.; Li Y.; Wei H.                                                                                 | Effects of a chimeric lysin against planktonic and sessile enterococcus faecalis hint at potential application in endodontic therapy                                                        | 2018 | Viruses                                             |
| Bahrololoomi Z.; Amrollahi N.                                                                                                   | Effects of acetaminophen and ibuprofen on pulpal anaesthesia immediately after pulpectomy of primary maxillary molars                                                                       | 2019 | Iranian Endodontic Journal                          |
| Aslantas E.E.; Buzoglu H.D.; Muftuoglu S.F.; Atila P.; Karapinar S.P.; Aksoy Y.                                                 | Effects of aging and inflammation on catalase activity in human dental pulp                                                                                                                 | 2022 | Archives of Oral Biology                            |
| Dahake P.T.; Kale Y.J.; Dadpe M.V.; Kendre S.B.                                                                                 | Effects of Biomimetic Materials on Stem Cells from Human Exfoliated Deciduous Teeth                                                                                                         | 2022 | Regenerative Engineering and Translational Medicine |
| Ajcharanukul O, Matthews B.                                                                                                     | Effects of bleaching on laser Doppler blood-flow signals recorded from human teeth in vitro                                                                                                 | 2015 | Arch Oral Biol                                      |
| Xu H.; Zhao J.; Chen G.; Yuan Z.; Liu J.                                                                                        | Effects of BMAL1 on dentinogenic differentiation of dental pulp stem cells via PI3K/Akt/mTOR pathway                                                                                        | 2022 | International Endodontic Journal                    |
| Michot B.; Casey S.M.; Gibbs J.L.                                                                                               | Effects of Calcitonin Gene-related Peptide on Dental Pulp Stem Cell Viability, Proliferation, and Differentiation                                                                           | 2020 | Journal of Endodontics                              |
| Chang M.-C.; Lin L.-D.; Wu M.-T.; Chan C.-P.; Chang H.-H.; Lee M.-S.; Sun T.-Y.; Jeng P.-Y.; Yeung S.-Y.; Lin H.-J.; Jeng J.-H. | Effects of camphorquinone on cytotoxicity, cell cycle regulation and prostaglandin E2 production of dental pulp cells: Role of ROS, ATM/Chk2, MEK/ERK and hemeoxygenase-1                   | 2015 | PLoS ONE                                            |
| Basurrah M., Kim D.H., Lee I.H., Kim S.W., Kim S.W.                                                                             | Effects of Dental Factors on Fungal Sinusitis                                                                                                                                               | 2022 | ORL                                                 |
| Jiang H., Shen L., Qin D., He S., Wang J.                                                                                       | Effects of dental general anaesthesia treatment on early childhood caries: A prospective cohort study in China                                                                              | 2019 | BMJ Open                                            |
| Cui Q, Wei M, Xiong Z, Hu S, Jiang J, Wang L, Cheng T, Wu X, Jiang H.                                                           | Effects of Dentin Ablation by a Q-Switching Er:YSGG Laser with a High Pulse Repetition Rate                                                                                                 | 2021 | Photobiomodul Photomed Laser Surg                   |
| Hassan T.; Qiu Y.; Hasan M.R.; Saito T.                                                                                         | Effects of Dentin Phosphophoryn-Derived RGD Peptides on the Differentiation and Mineralization of Human Dental Pulp Stem Cells In Vitro                                                     | 2022 | Biomedicines                                        |
| Gunes B., Yesildal Yeter K.                                                                                                     | Effects of Different Glide Path Files on Apical Debris Extrusion in Curved Root Canals                                                                                                      | 2018 | Journal of endodontics                              |
| Yazdanfar I, Gutknecht N, Franzen R.                                                                                            | Effects of diode laser on direct pulp capping treatment : a pilot study                                                                                                                     | 2015 | Lasers Med Sci                                      |
| Sokouti Emamzadeh Hashemi I.; Maleki D.; Ebrahim Seyyed Monir S.; Ebrahimi A.; Tabari R.; Mousavi E.                            | Effects of Diode Low-Level Laser Therapy of 810 Nm on Pulpal Anesthesia of Maxillary Premolars: A Double-Blind Randomized Clinical Trial                                                    | 2021 | European Endodontic Journal                         |

|                                                                                                                                   |                                                                                                                                                                                         |      |                                                                   |
|-----------------------------------------------------------------------------------------------------------------------------------|-----------------------------------------------------------------------------------------------------------------------------------------------------------------------------------------|------|-------------------------------------------------------------------|
| Niharika P.; Venugopal Reddy N.; Srujana P.; Srikanth K.; Daneswari V.; Sai Geetha K.                                             | Effects of distraction using virtual reality technology on pain perception and anxiety levels in children during pulp therapy of primary molars                                         | 2018 | Journal of Indian Society of Pedodontics and Preventive Dentistry |
| Banthithkunanon P, Chintakanan S, Wanachantararak S, Vongsavan N, Matthews B.                                                     | Effects of enamel and dentine thickness on laser Doppler blood-flow signals recorded from the underlying pulp cavity in human teeth in vitro                                            | 2013 | Arch Oral Biol                                                    |
| Kwon Y.-S.; Kim H.-J.; Hwang Y.-C.; Rosa V.; Yu M.-K.; Min K.-S.                                                                  | Effects of Epigallocatechin Gallate, an Antibacterial Cross-linking Agent, on Proliferation and Differentiation of Human Dental Pulp Cells Cultured in Collagen Scaffolds               | 2017 | Journal of Endodontics                                            |
| Yamakawa S.; Niwa T.; Karakida T.; Kobayashi K.; Yamamoto R.; Chiba R.; Yamakoshi Y.; Hosoya N.                                   | Effects of Er:YAG and diode laser irradiation on dental pulp cells and tissues                                                                                                          | 2018 | International Journal of Molecular Sciences                       |
| Yaman E., Görken F., Erdem A.P., Sepet E., Aytepe Z.                                                                              | Effects of folk medicinal plant extract ankaferd blood stopper® in vital primary molar pulpotomy                                                                                        | 2012 | European Archives of Paediatric Dentistry                         |
| Coll J.A., Campbell A., Chalmers N.I.                                                                                             | Effects of glass ionomer temporary restorations on pulpal diagnosis and treatment outcomes in primary molars                                                                            | 2013 | Pediatric Dentistry                                               |
| Luo Z.; Wang Z.; He X.; Liu N.; Liu B.; Sun L.; Wang J.; Ma F.; Duncan H.; He W.; Cooper P.                                       | Effects of histone deacetylase inhibitors on regenerative cell responses in human dental pulp cells                                                                                     | 2018 | International Endodontic Journal                                  |
| Zhang J.; Liu X.; Yu W.; Zhang Y.; Shi C.; Ni S.; Liu Q.; Li X.; Sun Y.; Zheng C.; Sun H.                                         | Effects of human vascular endothelial growth factor on reparative dentin formation                                                                                                      | 2016 | Molecular Medicine Reports                                        |
| Bernardi LG, Favoreto MW, de Souza Carneiro T, Borges CPF, Pulido C, Loguercio AD.                                                | Effects of microabrasion association to at-home bleaching on hydrogen peroxide penetration and color change                                                                             | 2022 | J Esthet Restor Dent                                              |
| Shi BQ, Yuan XJ, Zhao YM.                                                                                                         | Effects of mineral trioxide aggregate and ethanolic extracts of Shandong propolis on the biological properties of human dental pulp fibroblasts                                         | 2019 | Beijing Da Xue Xue Bao Yi Xue Ban                                 |
| Ameghani B.A.; Tavakoli A.; Tabatabaei M.H.; Valizadeh S.                                                                         | Effects of mineral trioxide aggregate and platelet-rich fibrin on histological results of direct pulp capping in dogs                                                                   | 2021 | Giornale Italiano di Endodonzia                                   |
| Araújo L.B.; Cosme-Silva L.; Fernandes A.P.; de Oliveira T.M.; Cavalcanti B.N.; Gomes Filho J.E.; Sakai V.T.                      | Effects of mineral trioxide aggregate, Biodentine™ and calcium hydroxide on viability, proliferation, migration and differentiation of stem cells from human exfoliated deciduous teeth | 2018 | Journal of Applied Oral Science                                   |
| Youssef A.-R.; Emara R.; Taher M.M.; Al-Allaf F.A.; Almalki M.; Almasri M.A.; Siddiqui S.S.                                       | Effects of mineral trioxide aggregate, calcium hydroxide, biodentine and Emdogain on osteogenesis, Odontogenesis, angiogenesis and cell viability of dental pulp stem cells             | 2019 | BMC Oral Health                                                   |
| Shi B.; Zhao Y.; Yuan X.                                                                                                          | Effects of MTA and Brazilian propolis on the biological properties of dental pulp cells                                                                                                 | 2019 | Brazilian Oral Research                                           |
| Nivetha R.; Murthykumar K.; Ashwin K.S.; Kumar N.; Priyadharshini R.                                                              | Effects of natural products on oral health: A review                                                                                                                                    | 2014 | Asian Journal of Pharmaceutical and Clinical Research             |
| Garrido P.R.; Pedroni A.C.F.; Cury D.P.; Moreira M.S.; Rosin F.; Sarra G.; Marques M.M.                                           | Effects of photobiomodulation therapy on the extracellular matrix of human dental pulp cell sheets                                                                                      | 2019 | Journal of Photochemistry and Photobiology B: Biology             |
| Ohkura N.; Edanami N.; Takeuchi R.; Tohma A.; Ohkura M.; Yoshiba N.; Yoshiba K.; Ida-Yonemochi H.; Ohshima H.; Okiji T.; Noiri Y. | Effects of pulpotomy using mineral trioxide aggregate on prostaglandin transporter and receptors in rat molars                                                                          | 2017 | Scientific Reports                                                |
| Liao C.; Wang Y.; Ou Y.; Wu Y.; Zhou Y.; Liang S.                                                                                 | Effects of sclerostin on lipopolysaccharide-induced inflammatory phenotype in human odontoblasts and dental pulp cells                                                                  | 2019 | International Journal of Biochemistry and Cell Biology            |
| Moon C.-Y.; Nam O.H.; Kim M.; Lee H.-S.; Kaushik S.N.; Walma D.A.C.; Jun H.-W.; Cheon K.; Choi S.C.                               | Effects of the nitric oxide releasing biomimetic nanomatrix gel on pulp-dentin regeneration: Pilot study                                                                                | 2018 | PLoS ONE                                                          |
| Vanja P.; Nataša P.; Mia R.; Leković V.; Una V.; Stojić Ž.                                                                        | Effects of the platelet rich plasma on apexogenesis in young monkeys: Radiological and histological evaluation                                                                          | 2012 | Acta Veterinaria                                                  |
| Lee M.-S.; Chen Y.-L.; Huang P.-H.; Chiang Y.-C.; Chang H.-H.; Wu J.; Lin C.-P.                                                   | Effects of ultrasonic and high-speed air-driven devices on pulp-dentin reactions: An animal study                                                                                       | 2014 | Journal of Dental Sciences                                        |
| Su N.; Wang H.; Zhang S.; Liao S.; Yang S.; Huang Y.                                                                              | Efficacy and safety of bupivacaine versus lidocaine in dental treatments: A meta-analysis of randomised controlled trials                                                               | 2014 | International Dental Journal                                      |
| Arruda-Vasconcelos R.; Barbosa-Ribeiro M.; Louzada L.M.; Lemos B.I.N.; de-Jesus-Soares A.; Ferraz                                 | Efficacy of 6% Sodium Hypochlorite on Infectious Content of Teeth with Symptomatic Irreversible Pulpitis                                                                                | 2022 | Journal of Endodontics                                            |

|                                                                                                              |                                                                                                                                                                                                                                   |      |                                                                   |
|--------------------------------------------------------------------------------------------------------------|-----------------------------------------------------------------------------------------------------------------------------------------------------------------------------------------------------------------------------------|------|-------------------------------------------------------------------|
| C.C.R.; Almeida J.F.A.; Marciano M.A.; Gomes B.P.F.A.                                                        |                                                                                                                                                                                                                                   |      |                                                                   |
| Vahedi Z.; Moshari A.; Moshari M.                                                                            | Efficacy of adding dexmedetomidine to lidocaine to enhance inferior alveolar nerve block in patients with asymptomatic irreversible pulpitis: double-blind randomized clinical trial                                              | 2022 | Clinical Oral Investigations                                      |
| Gonna S., Ghoname N., Kabbash A., Yagi A.                                                                    | Efficacy of aloe vera as a pulpotomy agent in children primary teeth: Clinical and radiographic studies                                                                                                                           | 2019 | Journal of Gastroenterology and Hepatology Research               |
| Singhal N, Vats A, Khetarpal A, Ahlawat M, Vijayran VKR, Harshita.                                           | Efficacy of articaine versus mepivacaine administered as different supplementary local anesthetic techniques after a failed inferior alveolar nerve block with lidocaine in patients with irreversible pulpitis: An in vivo study | 2022 | J Conserv Dent                                                    |
| Jasani B, Musale P, Jasani B.                                                                                | Efficacy of Biodentine versus formocresol in pulpotomy of primary teeth: a systematic review and meta-analysis                                                                                                                    | 2022 | Quintessence Int                                                  |
| Alqahtani A.R.; Yaman P.; McDonald N.; Dennison J.                                                           | Efficacy of calcium hydroxide and resin-modified calcium silicate as pulp-capping materials: a retrospective study                                                                                                                | 2020 | General dentistry                                                 |
| Peskersoy C.; Lukarcenin J.; Turkun M.                                                                       | Efficacy of different calcium silicate materials as pulp-capping agents: Randomized clinical trial                                                                                                                                | 2021 | Journal of Dental Sciences                                        |
| Cushley S, Duncan HF, Lappin MJ, Chua P, Elamin AD, Clarke M, El-Karim IA.                                   | Efficacy of direct pulp capping for management of cariously exposed pulps in permanent teeth: a systematic review and meta-analysis                                                                                               | 2021 | Int Endod J                                                       |
| Naseri N.; Ghasemi N.; Baherimoghadam T.; Azmi A.                                                            | Efficacy of Er,Cr:YSGG laser for debonding of ceramic brackets and prevention of enamel damage and intrapulpal temperature change                                                                                                 | 2020 | Lasers in Dental Science                                          |
| Saber S.M.; Hashem A.A.; Khalil D.M.; Pirani C.; Ordinola-Zapata R.                                          | Efficacy of four local anaesthesia protocols for mandibular first molars with symptomatic irreversible pulpitis: A randomized clinical trial                                                                                      | 2022 | International Endodontic Journal                                  |
| Venkataraman K., Boominathan S., Nagappan R., Abraham C., Kaliyaperumal A., Nachimuthu J., Premkumar M.      | Efficacy of glycolic acid on debris and smear removal as a final rinse solution in curved canals: A scanning electron microscope study                                                                                            | 2021 | Journal of Pharmacy and Bioallied Sciences                        |
| Saeed M.A.; El-Rahman M.A.; Helal M.E.; Zaher A.R.; Grawish M.E.                                             | Efficacy of human platelet rich fibrin exudate vs fetal bovine serum on proliferation and differentiation of dental pulp stem cells                                                                                               | 2017 | International Journal of Stem Cells                               |
| Ghoddusi J.; Zarrabi M.H.; Daneshvar F.; Naghavi N.                                                          | Efficacy of IANB and gox-gates techniques in mandibular molars with symptomatic irreversible pulpitis: A prospective randomized double blind clinical study                                                                       | 2018 | Iranian Endodontic Journal                                        |
| Liang Y.; Ma R.; Chen L.; Dai X.; Zuo S.; Jiang W.; Hu N.; Deng Z.; Zhao W.                                  | Efficacy of i-PRF in regenerative endodontics therapy for mature permanent teeth with pulp necrosis: study protocol for a multicentre randomised controlled trial                                                                 | 2021 | Trials                                                            |
| Akhlaghi N.M.; Hormozi B.; Abbott P.V.; Khalilak Z.                                                          | Efficacy of Ketorolac Buccal Infiltrations and Inferior Alveolar Nerve Blocks in Patients with Irreversible Pulpitis: A Prospective, Double-blind, Randomized Clinical Trial                                                      | 2016 | Journal of Endodontics                                            |
| Yavagal C.; Lal A.; Chavan Patil V.; Yavagal P.; Neelakantappa K.; Hariharan M.                              | Efficacy of laser photobiomodulation pulpotomy in human primary teeth: A randomized controlled trial                                                                                                                              | 2021 | Journal of Indian Society of Pedodontics and Preventive Dentistry |
| Samiei M.; Yavari H.; Shahi S.; Skandarinezhad M.; Abdollahi A.A.; Abolhasani S.                             | Efficacy of mental-incisive nerve block in root canal treatment of mandibular first molars with asymptomatic irreversible pulpitis: a randomized controlled trial                                                                 | 2020 | General dentistry                                                 |
| Rodríguez-Wong L.; Pozos-Guillen A.; Silva-Herzog D.; Chavarria-Bolaños D.                                   | Efficacy of mepivacaine-tramadol combination on the success of inferior alveolar nerve blocks in patients with symptomatic irreversible pulpitis: A randomized clinical trial                                                     | 2016 | International Endodontic Journal                                  |
| Kérourédan O.; Jallon L.; Perez P.; Germain C.; Péli J.-F.; Oriez D.; Fricain J.-C.; Arrivé E.; Devillard R. | Efficacy of orally administered prednisolone versus partial endodontic treatment on pain reduction in emergency care of acute irreversible pulpitis of mandibular molars: Study protocol for a randomized controlled trial        | 2017 | Trials                                                            |
| Shobana S.; Kavitha M.; Srinivasan N.                                                                        | Efficacy of Platelet Rich Plasma and Platelet Rich Fibrin for Direct Pulp Capping in Adult Patients with Carious Pulp Exposure- A Randomised Controlled Trial                                                                     | 2022 | European Endodontic Journal                                       |
| Shafie L.; Esmaili S.; Parirokh M.; Pardakhti A.; Nakhaee N.; Abbott P.V.; Barghi H.                         | Efficacy of pre-medication with ibuprofen on post-operative pain after pulpotomy in primary molars                                                                                                                                | 2018 | Iranian Endodontic Journal                                        |
| Mustafa M.; Almnea R.; Ajmal M.; Alamri H.M.; Abdulwahed A.; Divakar D.D.                                    | Efficacy of root canal treatment in c-shaped canals with adjunctive photodynamic therapy using micro-CT                                                                                                                           | 2021 | Photodiagnosis and Photodynamic Therapy                           |

|                                                                                                                                                                                                                                                                 |                                                                                                                                                                                                                    |      |                                                              |
|-----------------------------------------------------------------------------------------------------------------------------------------------------------------------------------------------------------------------------------------------------------------|--------------------------------------------------------------------------------------------------------------------------------------------------------------------------------------------------------------------|------|--------------------------------------------------------------|
| Patil A.; Mali S.; Hegde D.; Jaiswal H.; Saoji H.; Edake D.N.                                                                                                                                                                                                   | Efficacy of rotary and hand instrument in removing gutta-percha and sealer from root canals of endodontically treated teeth                                                                                        | 2018 | Journal of Contemporary Dental Practice                      |
| Atasoy Ulusoy O.I.; Alaçam T.                                                                                                                                                                                                                                   | Efficacy of single buccal infiltrations for maxillary first molars in patients with irreversible pulpitis: A randomized controlled clinical trial                                                                  | 2014 | International Endodontic Journal                             |
| Parirokh M, Sadr S, Nakhaee N, Abbott PV, Askarifard S.                                                                                                                                                                                                         | Efficacy of supplementary buccal infiltrations and intraligamentary injections to inferior alveolar nerve blocks in mandibular first molars with asymptomatic irreversible pulpitis: a randomized controlled trial | 2014 | Int Endod J                                                  |
| Keefe S.M.; Hoffman-Censits J.; Cohen R.B.; Mamtani R.; Heitjan D.; Eliasof S.; Nixon A.; Turnbull B.; Garmey E.G.; Gunnarsson O.; Waliki M.; Ciconte J.; Jayaraman L.; Senderowicz A.; Tellez A.B.; Hennessy M.; Piscitelli A.; Vaughn D.; Smith A.; Haas N.B. | Efficacy of the nanoparticle-drug conjugate CRLX101 in combination with bevacizumab in metastatic renal cell carcinoma: Results of an investigator-initiated phase I-IIa clinical trial                            | 2016 | Annals of Oncology                                           |
| Rajasekharan S, Martens LC, Vandenbulcke J, Jacquet W, Bottenberg P, Cauwels RG.                                                                                                                                                                                | Efficacy of three different pulpotomy agents in primary molars: a randomized control trial                                                                                                                         | 2017 | Int Endod J                                                  |
| Ismiyatin K.; Subiyanto A.; Suhartono M.; Sari P.T.; Widjaja O.V.; Sari R.P.                                                                                                                                                                                    | Efficacy of topical hydrogel Epigallocatechin-3-gallate against neutrophil cells in perforated dental pulp                                                                                                         | 2020 | Dental Journal                                               |
| Nagarathna C, Shakuntala BS, Jaiganesh I.                                                                                                                                                                                                                       | Efficiency and Reliability of Thermal and Electrical Tests to Evaluate Pulp Status in Primary Teeth with Assessment of Anxiety Levels in Children                                                                  | 2015 | J Clin Pediatr Dent                                          |
| Silva C.B.B.; Bronzato J.D.; Herrera D.R.; Montagner F.; Nunes E.L.; Gomes B.P.F.A.                                                                                                                                                                             | Efficiency of a digital electrofulguration system in contaminated root canals in vitro                                                                                                                             | 2021 | Brazilian Dental Journal                                     |
| Zhang B., Yang B.-B., Gao Z.-Y., Li L., An H.                                                                                                                                                                                                                   | Efficiency of diode laser-assisted methods in direct pulp capping of carious teeth                                                                                                                                 | 2020 | Shanghai kou qiang yi xue = Shanghai journal of stomatology  |
| Orimoto A.; Kyakumoto S.; Eitsuka T.; Nakagawa K.; Kiyono T.; Fukuda T.                                                                                                                                                                                         | Efficient immortalization of human dental pulp stem cells with expression of cell cycle regulators with the intact chromosomal condition                                                                           | 2020 | PLoS ONE                                                     |
| Richards J.F.; McClanahan S.B.; Bowles W.R.                                                                                                                                                                                                                     | Electrical Pulp Testing: Sources of Error                                                                                                                                                                          | 2015 | Northwest dentistry                                          |
| Daghery A.; Aytac Z.; Dubey N.; Mei L.; Schwendeman A.; Bottino M.C.                                                                                                                                                                                            | Electrospinning of dexamethasone/cyclodextrin inclusion complex polymer fibers for dental pulp therapy                                                                                                             | 2020 | Colloids and Surfaces B: Biointerfaces                       |
| Ayoub A.A.; Mahmoud A.H.; Ribeiro J.S.; Daghrery A.; Xu J.; Fenno J.C.; Schwendeman A.; Sasaki H.; Dal-Fabbro R.; Bottino M.C.                                                                                                                                  | Electrospun Azithromycin-Laden Gelatin Methacryloyl Fibers for Endodontic Infection Control                                                                                                                        | 2022 | International Journal of Molecular Sciences                  |
| Du Y.; Yu X.; Wang W.; Zhao X.; Zhang L.; Sun Y.; Wang X.; Yu Q.                                                                                                                                                                                                | Elevated expression of importin 8 in inflamed human dental pulps                                                                                                                                                   | 2017 | International Journal of Clinical and Experimental Pathology |
| Lloyd A.; Uhles J.P.; Clement D.J.; Garcia-Godoy F.                                                                                                                                                                                                             | Elimination of intracanal tissue and debris through a novel laser-activated system assessed using high-resolution micro-computed tomography: A pilot study                                                         | 2014 | Journal of Endodontics                                       |
| Greenfield B.A.                                                                                                                                                                                                                                                 | Enamel defect restoration of the left mandibular first molar tooth                                                                                                                                                 | 2012 | Journal of Veterinary Dentistry                              |
| Zhang B.; Xiao M.; Cheng X.; Bai Y.; Chen H.; Yu Q.; Qiu L.                                                                                                                                                                                                     | Enamel Matrix Derivative Enhances the Odontoblastic Differentiation of Dental Pulp Stem Cells via Activating MAPK Signaling Pathways                                                                               | 2022 | Stem Cells International                                     |
| Santana Neto M.C.; Lopes Bandeira A.V.; Santos Sousa H.C.; De Moura M.S.; De Fátima Almeida De Deus Moura L.; De Lima M.D.M.                                                                                                                                    | Enamel of Premolars whose Predecessors Presented Rupture of the Follicle Bone Crypt from Periapical Infections                                                                                                     | 2020 | Journal of Clinical Pediatric Dentistry                      |
| Rathi C., Chandak M., Mishra S., Chandak M.                                                                                                                                                                                                                     | Endocrown a new modality of treatment: Management of three cases                                                                                                                                                   | 2020 | European Journal of Molecular and Clinical Medicine          |
| Dash S., Jena D., Govind S., Jena S.P., Singh N.R.                                                                                                                                                                                                              | Endocrowns: A comprehensive review                                                                                                                                                                                 | 2020 | Indian Journal of Forensic Medicine and Toxicology           |
| Bahillo J.; Freire M.; Martin-Biedma B.; Castelo-Baz P.                                                                                                                                                                                                         | Endodontic and aesthetic management of a conoid tooth with type IIIA dens invaginatus                                                                                                                              | 2021 | European Journal of Paediatric Dentistry                     |

|                                                                                                                                       |                                                                                                                                                                      |      |                                                                |
|---------------------------------------------------------------------------------------------------------------------------------------|----------------------------------------------------------------------------------------------------------------------------------------------------------------------|------|----------------------------------------------------------------|
| Reis S  M.V.; Bonatto P.; Barreto M.S.; Vivian R.R.; Weidlich P.; Da Rosa R.A.                                                        | Endodontic and periodontal treatment of external cervical root resorption: A case report                                                                             | 2015 | Dental Press Endodontics                                       |
| Bahcall J.                                                                                                                            | Endodontic diagnosis: There's an app for that!                                                                                                                       | 2012 | Dentistry Today                                                |
| Sasser L.                                                                                                                             | Endodontic Disinfection for Orthograde Root Canal Treatment in Veterinary Dentistry                                                                                  | 2020 | J Vet Dent                                                     |
|  ogoe M.-M.; Cr ciunescu E.-L.; Topal  F.-I.; Sinescu C.; Nica L.M.; Ioni   C.; Duma V.-F.; Rom nu M.; Podoleanu A.G.; Negru iu M.-L. | Endodontic fillings evaluated using en face OCT, microCT and SEM                                                                                                     | 2021 | Romanian Journal of Morphology and Embryology                  |
| Gbadebo S.O.; Sulaiman A.O.; Anifowose O.O.                                                                                           | Endodontic flare up: incidence and association of possible risk factors                                                                                              | 2016 | African journal of medicine and medical sciences               |
| Kunwar D.; Manandhar A.; Gurung G.; Khadka J.; Nepal M.                                                                               | Endodontic indications among patients visiting a tertiary care center: A descriptive cross-sectional study                                                           | 2021 | Journal of the Nepal Medical Association                       |
| Sebring D., Buhlin K., Norhammar A., Ryd n L., Jonasson P., Lund H., Kvist T.                                                         | Endodontic inflammatory disease: A risk indicator for a first myocardial infarction                                                                                  | 2022 | International endodontic journal                               |
| Santos B.S.; Silva R.V.; Pereira R.P.; Nunes E.                                                                                       | Endodontic intervention for type II dens invaginatus: A case report                                                                                                  | 2016 | Dental Press Endodontics                                       |
| Mei X.-H.; Liu J.; Wang W.; Zhang Q.-X.; Hong T.; Bai S.-Z.; Cheng X.-G.; Tian Y.; Jiang W.-K.                                        | Endodontic management of a fused left maxillary second molar and two paramolars using cone beam computed tomography: A case report                                   | 2022 | World Journal of Clinical Cases                                |
| Almutairi W., Alduraibi M.                                                                                                            | Endodontic Management of a Fused Mandibular Third Molar with Supernumerary Tooth Using Cone-Beam Computed Tomography: A Case Report                                  | 2022 | American Journal of Case Reports                               |
| Yadav K, De Ataide IN, Fernandes M, Lambor R, Alreja D.                                                                               | Endodontic Management of a Mandibular First Molar with Radix Entomolaris and Conservative Post-endodontic Restoration with CAD/CAM Onlay: A Novel Clinical Technique | 2016 | J Clin Diagn Res                                               |
| Lin G.S.S.; Ghani N.R.N.A.; Mokhtar K.; Halim M.S.                                                                                    | Endodontic management of a mature mandibular first permanent molar that survived for 20 years after complete pulpotomy: A case report                                | 2019 | Archives of Orofacial Sciences                                 |
| Turkyilmaz A, Bulut AC, Hancerliogullari D.                                                                                           | Endodontic management of a patient with dystrophic epidermolysis bullosa: A case report                                                                              | 2021 | Aust Endod J                                                   |
| Ramezani M., Asgari S., Adel M.                                                                                                       | Endodontic management of a rare case of the geminated maxillary second molar tooth using CBCT                                                                        | 2021 | Clinical Case Reports                                          |
| Parolia A.; Khosla M.; Kundabala M.                                                                                                   | Endodontic management of hypo-, meso- and hypertaurodontism: Case reports                                                                                            | 2012 | Australian Endodontic Journal                                  |
| Tomar D.; Dhingra A.; Tomer A.; Sharma S.; Sharma V.; Miglani A.                                                                      | Endodontic management of mandibular third molar with three mesial roots using spiral computed tomography scan as a diagnostic aid: A case report                     | 2013 | Oral Surgery, Oral Medicine, Oral Pathology and Oral Radiology |
| Battula MS, Kaushik M, Mehra N, Singh A.                                                                                              | Endodontic management of maxillary first molar with unusual anatomy                                                                                                  | 2022 | J Conserv Dent                                                 |
| Sundaresk K.J.; Srinivasan R.; Mallikarjuna R.; Rajalbandi S.                                                                         | Endodontic management of middle mesial canal of the mandibular molar                                                                                                 | 2013 | BMJ Case Reports                                               |
| Alfahadi H.R.; Alghamdi A.M.                                                                                                          | Endodontic management of permanent mandibular canine with Type II canal configuration using cone-beam computed tomography. A Case report                             | 2020 | Saudi Endodontic Journal                                       |
| Howlader M.R.; Chowdhury S.S.; Rahman M.; Hossain A.; Zannat T.A.                                                                     | Endodontic management of symptomatic pulpal pathosis by single -visit root canal therapy.                                                                            | 2014 | Mymensingh medical journal : MMJ                               |
| Celikten B., Yalniz H., Huang Y.                                                                                                      | Endodontic management of taurodontism with a complex root canal anatomy in mandibular posterior teeth                                                                | 2017 | BMJ Case Reports                                               |
| Zhang ZH, Yao HL, Zhang Y, Wang X.                                                                                                    | Endodontic management of the maxillary first molar with special root canals: A case report and review of the literature                                              | 2020 | World J Clin Cases                                             |
| Liu J.; Que K.-H.; Xiao Z.-H.; Wen W.                                                                                                 | Endodontic management of the maxillary first molars with two root canals: A case report and review of the literature                                                 | 2019 | World Journal of Clinical Cases                                |
| Ramugade M.M., Patel A., Sagale A., Abrar S.                                                                                          | Endodontic management of unusual maxillary first molar with fusion using cone-beam computed tomography as a diagnostic aid                                           | 2019 | Journal of Clinical and Diagnostic Research                    |
| Rodrigues M.X.; Nemec A.; Fiani N.; Bicalho R.C.; Peralta S.                                                                          | Endodontic Microbiome of Fractured Non-vital Teeth in Dogs Determined by 16S rRNA Gene Sequencing                                                                    | 2019 | Frontiers in Veterinary Science                                |
| Zubizarreta-Macho  , Ferreiroa A, Agust n-Panadero R, Rico-Romano C, Lobo-Galindo AB, Mena- lvarez J.                                 | Endodontic re-treatment and restorative treatment of a dens invaginatus type II through new technologies                                                             | 2019 | J Clin Exp Dent                                                |

|                                                                                                                           |                                                                                                                                   |      |                                                                                |
|---------------------------------------------------------------------------------------------------------------------------|-----------------------------------------------------------------------------------------------------------------------------------|------|--------------------------------------------------------------------------------|
| Shobhana R., Subbiya A., Geethapriya N., Anuradha B.                                                                      | Endodontic retreatment of mandibular second molar with middle mesial canal: A case report                                         | 2019 | Indian Journal of Public Health Research and Development                       |
| Pinheiro H.H.C.; Assunção L.R.S.; Torres D.K.B.; Miyahara L.A.N.; Arantes D.C.                                            | Endodontic therapy in primary teeth by pediatric dentists; Terapia endodôntica em dentes decíduos por odontopediatras             | 2014 | Pesquisa Brasileira em Odontopediatria e Clínica Integrada                     |
| Macgee S.                                                                                                                 | Endodontic therapy of a mandibular canine tooth with irreversible pulpitis secondary to dentigerous cyst                          | 2014 | Journal of Veterinary Dentistry                                                |
|                                                                                                                           | Endodontic treatment                                                                                                              | 2017 | Duodecim                                                                       |
| Firmino R.T.; Brandt L.M.T.; Ribeiro G.L.; dos Santos K.S.A.; Catão M.H.C.D.V.; Gomes D.Q.D.C.                            | Endodontic treatment associated with photodynamic therapy: Case report                                                            | 2016 | Photodiagnosis and Photodynamic Therapy                                        |
| Anuradha B., Sharumathi R., Venkatesh A., Niveditha S.                                                                    | Endodontic treatment failures and its management—a review                                                                         | 2019 | Indian Journal of Public Health Research and Development                       |
| Seewald M.; Gohl C.; Egerbacher M.; Handschuh S.; Witter K.                                                               | Endodontic Treatment of a Traumatic Tusk Fracture With Exposed Pulp in an Asian Elephant ( <i>Elephas maximus</i> )               | 2021 | Journal of Veterinary Dentistry                                                |
| Buchanan G.D.; Tredoux S.; Nel C.; Gamielien M.Y.                                                                         | Endodontic treatment of dentin dysplasia type I D                                                                                 | 2021 | Australian Endodontic Journal                                                  |
| C do Nascimento A., A F Marques A., C Sponchiado-Júnior E., F R Garcia L., M A de Carvalho F.                             | Endodontic Treatment of Hyperturodontic Mandibular Molar Using Reciprocating Single-file System: A Case Report                    | 2016 | The Bulletin of Tokyo Dental College                                           |
| Chauhan R., Singh S.                                                                                                      | Endodontic treatment of mandibular molars with atypical root canal anatomy: reports of 4 cases                                    | 2015 | General dentistry                                                              |
| De Deus Moura L.D.F.A.; De Lima M.D.D.M.; Lima C.C.B.; Machado J.I.A.G.; De Moura M.S.; De Carvalho P.V.                  | Endodontic treatment of primary molars with antibiotic paste: A report of 38 cases                                                | 2016 | Journal of Clinical Pediatric Dentistry                                        |
| Di Giorgio G., Covello F., Salucci A., Bossù M.                                                                           | Endodontic treatment of the deciduous tooth                                                                                       | 2020 | Dental Cadmos                                                                  |
| Pires M.D., Martins J.N.R.                                                                                                | Endodontic treatment of the mandibular first molar with three distal root canals - Case series                                    | 2019 | Revista Portuguesa de Estomatologia, Medicina Dentaria e Cirurgia Maxilofacial |
| Martins J.N.R.; Anderson C.                                                                                               | Endodontic treatment of the maxillary first molar with five root canals - Three case reports                                      | 2013 | Revista Portuguesa de Estomatologia, Medicina Dentaria e Cirurgia Maxilofacial |
| Chen K, Ran X, Wang Y.                                                                                                    | Endodontic treatment of the maxillary first molar with palatal canal variations: A case report and review of literature           | 2022 | World J Clin Cases                                                             |
| Lu Q, Wang P, Yang B, Liu XJ, Wang SY, Yu Q.                                                                              | Endodontic treatments of mandibular first molar with middle mesial canal: two case reports                                        | 2013 | Chin J Dent Res                                                                |
| Lopes C.S.; de Azevedo Moreira S.; Nicoli G.A.; Ramirez I.; Viola N.V.                                                    | Endodontical treatment of periapical tooth injury with photodynamic therapy: Case report                                          | 2019 | Photodiagnosis and Photodynamic Therapy                                        |
| Prati C., Pelliccioni G.A., Gissi D., Spinelli A., Zamparini F., Gandolfi M.G.                                            | Endodontics in presence of systemic diseases: operative techniques and their importance                                           | 2021 | Dental Cadmos                                                                  |
| Jivoinovici R.; Suci I.; Dimitriu B.; Perlea P.; Bartok R.; Malita M.; Ionescu C.                                         | Endo-periodontal lesion--endodontic approach                                                                                      | 2014 | Journal of medicine and life                                                   |
| Yoo C.H.; Na H.-J.; Lee D.-S.; Heo S.C.; An Y.; Cha J.; Choi C.; Kim J.H.; Park J.-C.; Cho Y.S.                           | Endothelial progenitor cells from human dental pulp-derived iPS cells as a therapeutic target for ischemic vascular diseases      | 2013 | Biomaterials                                                                   |
| Ribeiro J.S.; Münchow E.A.; Bordini E.A.F.; Rodrigues N.S.; Dubey N.; Sasaki H.; Fenno J.C.; Schwendeman S.; Bottino M.C. | Engineering of Injectable Antibiotic-Laden Fibrous Microparticles Gelatin Methacryloyl Hydrogel for Endodontic Infection Ablation | 2022 | International Journal of Molecular Sciences                                    |
| Mehboob R.; Hassan S.; Gilani S.A.; Hassan A.; Tanvir I.; Waseem H.; Hanif A.                                             | Enhanced Neurokinin-1 Receptor Expression Is Associated with Human Dental Pulp Inflammation and Pain Severity                     | 2021 | BioMed Research International                                                  |
| Alqarawi F.K.                                                                                                             | Enhancing the esthetics of a maxillary central implant crown with a hybrid-abutment: A case report                                | 2022 | Saudi Journal of Medicine and Medical Sciences                                 |
| Kovac J.; Kovac D.; Slobodnikova L.; Kotulova D.                                                                          | Enterococcus faecalis and Candida albicans in the dental root canal and periapical infections                                     | 2013 | Bratislava Medical Journal                                                     |



|                                                                                                                                                                          |                                                                                                                                                                    |      |                                                      |
|--------------------------------------------------------------------------------------------------------------------------------------------------------------------------|--------------------------------------------------------------------------------------------------------------------------------------------------------------------|------|------------------------------------------------------|
| Sabogal Á, Asencios J, Robles A, Gamboa E, Rosas J, Ríos J, Mayta-Tovalino F.                                                                                            | Epidemiological Profile of the Pathologies of the Oral Cavity in a Peruvian Population: A 9-Year Retrospective Study of 18,639 Patients                            | 2019 | ScientificWorldJournal                               |
| Liu Y.; Gan L.; Cui D.-X.; Yu S.-H.; Pan Y.; Zheng L.-W.; Wan M.                                                                                                         | Epigenetic regulation of dental pulp stem cells and its potential in regenerative endodontics                                                                      | 2021 | World Journal of Stem Cells                          |
| Smedley RC, Earley ET, Galloway SS, Baratt RM, Rawlinson JE.                                                                                                             | Equine Odontoclastic Tooth Resorption and Hypercementosis: Histopathologic Features                                                                                | 2015 | Vet Pathol                                           |
| Yonehiro J.; Yamashita A.; Yoshida Y.; Yoshizawa S.; Ohta K.; Kamata N.; Okihara T.; Nishimura F.                                                                        | Establishment of an ex vivo pulpitis model by co-culturing immortalized dental pulp cells and macrophages                                                          | 2012 | International Endodontic Journal                     |
| Ma Z.; Zhou M.; Wang L.; Cheng Q.; Hong J.                                                                                                                               | Establishment of Pulp Damage Repair Models in Miniature Pigs Using Diode Lasers                                                                                    | 2021 | Photobiomodulation, Photomedicine, and Laser Surgery |
| Barroso S.D.; Jales T.S.; Corrêa-Faria P.; Alcântara C.E.P.; Botelho A.M.; Tavano K.T.A.                                                                                 | Esthetic and functional recovery of extensively decayed posterior teeth through conservative treatment                                                             | 2013 | Journal of Clinical Pediatric Dentistry              |
| Alkaabi A.M.; AlHumaidan A.A.; AlQarawi F.K.; AlShahrani F.A.                                                                                                            | Esthetic smile rehabilitation of enamel hypomineralized teeth with E-max prosthesis: Case report                                                                   | 2019 | Saudi Dental Journal                                 |
| Mashyakh M, Vinothkumar TS, Arthistri AS, Renugalakshmi A, Alamir A, Alkahtany M, Juraybi A.                                                                             | Ethnic Anatomical Differences in Mandibular First Permanent Molars between Indian and Saudi Arabian Subpopulations: A Retrospective Cross-sectional Study          | 2021 | J Contemp Dent Pract                                 |
| Siqueira V.-D.S.; Mateo-Castillo J.-F.; Pinto L.-D.C.; Garib D.; Pinheiro C.-R.                                                                                          | Etiological factors commonly related to the need of endodontic treatment in individuals with orofacial clefts                                                      | 2021 | Journal of Clinical and Experimental Dentistry       |
| Rasera Zotelli V.L.; Grillo C.M.; Rosário de Sousa M.D.L.                                                                                                                | Etiology of acute dental pain in patients accepting acupuncture procedures; Etiología del dolor dental agudo en pacientes que aceptan procedimientos de acupuntura | 2017 | Revista Internacional de Acupuntura                  |
| Duncan H.F., Galler K.M., Tomson P.L., Simon S., El-Karim I., Kundzina R., Krastl G., Dammaschke T., Fransson H., Markvart M., Zehnder M., Bjørndal L.                   | European Society of Endodontology position statement: Management of deep caries and the exposed pulp                                                               | 2019 | International endodontic journal                     |
| Idzik S.; Krauss E.                                                                                                                                                      | Evaluating and managing dental complaints in primary and urgent care                                                                                               | 2013 | Journal for Nurse Practitioners                      |
| Rao A.C.; Venkatesh K.V.; Nandini V.; Sihivahanan D.; Alamoudi A.; Bahammam H.A.; Bahammam S.A.; Zidane B.; Bahammam M.A.; Chohan H.; Albar N.H.; Yadalam P.K.; Patil S. | Evaluating the Effect of Tideglusib-Loaded Bioactive Glass Nanoparticles as a Potential Dentine Regenerative Material                                              | 2022 | Materials                                            |
| Abella F.; Patel S.; Duran-Sindreu F.; Mercadé M.; Bueno R.; Roig M.                                                                                                     | Evaluating the periapical status of teeth with irreversible pulpitis by using cone-beam computed tomography scanning and periapical radiographs                    | 2012 | Journal of Endodontics                               |
| Peng X.; Han S.; Wang K.; Ding L.; Liu Z.; Zhang L.                                                                                                                      | Evaluating the potential of an amelogenin-derived peptide in tertiary dentin formation                                                                             | 2021 | Regenerative Biomaterials                            |
| Minavi B.; Youssefi A.; Quock R.; Letra A.; Silva R.; Kirkpatrick T.C.; Tribble G.; van der Hoeven R.                                                                    | Evaluating the substantivity of silver diamine fluoride in a dentin model                                                                                          | 2021 | Clinical and Experimental Dental Research            |
| Patel S., Patel P., Patel P., Agnani S., Kumar A., Mangalekar S.B.                                                                                                       | Evaluation and comparison of apical bacterial extrusion after instrumentation of the root canals using various endodontic file systems: An in vitro study          | 2022 | Journal of Pharmaceutical Negative Results           |
| Vishanth S.; Sherwood I.A.; Gutmann J.L.; Murugadoss V.; Prince E.                                                                                                       | Evaluation of 3 different treatment modalities for conservative management of attrited, sensitive molar teeth – A preliminary 12-week report                       | 2020 | Australian Endodontic Journal                        |
| Liu S.; Wang S.; Dong Y.                                                                                                                                                 | Evaluation of a Bioceramic as a Pulp Capping Agent in Vitro and in Vivo                                                                                            | 2015 | Journal of Endodontics                               |
| Waring E.; Mawardi H.; Woo S.B.; Treister N.; Margalit D.N.; Frustino J.; Villa A.                                                                                       | Evaluation of a community-based dental screening program prior to radiotherapy for head and neck cancer: a single-center experience                                | 2019 | Supportive Care in Cancer                            |
| Aboujaoude S.; Noueiri B.; Berbari R.; Khairalla A.; Sfeir E.                                                                                                            | Evaluation of a modified pulpotec endodontic approach on necrotic primary molars: A one-year follow-up                                                             | 2015 | European Journal of Paediatric Dentistry             |
| Du T.; Ma J.; Yang P.; Xiong Z.; Lu X.; Cao Y.                                                                                                                           | Evaluation of antibacterial effects by atmospheric pressure nonequilibrium plasmas against enterococcus faecalis biofilms in vitro                                 | 2012 | Journal of Endodontics                               |
| Diniz I.M.; Teixeira K.I.; Araújo P.V.; Araújo M.S.; Marques M.M.; Poletto L.T.; Cortés M.E.                                                                             | Evaluation of antibacterial photodynamic therapy effects on human dental pulp cell cultures                                                                        | 2014 | Photodiagnosis and photodynamic therapy              |

|                                                                                                                                                                                  |                                                                                                                                                                                       |      |                                                              |
|----------------------------------------------------------------------------------------------------------------------------------------------------------------------------------|---------------------------------------------------------------------------------------------------------------------------------------------------------------------------------------|------|--------------------------------------------------------------|
| Divya S., Sujatha S.                                                                                                                                                             | Evaluation of antimicrobial effect of triphala versus conventional root canal irrigants in primary teeth - An in vivo study                                                           | 2019 | Research Journal of Pharmacy and Technology                  |
| Singh A.; Kaur H.; Soni P.; Choudhary R.; Yeluri R.                                                                                                                              | Evaluation of biodentine pulpotomy in caries-exposed symptomatic vital mature permanent teeth in 9–13-year-old children: A 24-month clinico-radiographic observation                  | 2022 | Journal of Dental Research, Dental Clinics, Dental Prospects |
| Allabban M.N.M., Youssef S.A., Nejri A.A.M., Qudaih M.A.A.                                                                                                                       | Evaluation of bond strength of aesthetic type of posts at different regions of root canal after application of adhesive resin cement                                                  | 2019 | Open Access Macedonian Journal of Medical Sciences           |
| Chopra R.; Marwaha M.; Bansal K.; Mittal M.                                                                                                                                      | Evaluation of buccal infiltration with articaine and inferior alveolar nerve block with lignocaine for pulp therapy in mandibular primary molars                                      | 2016 | Journal of Clinical Pediatric Dentistry                      |
| Aggarwal R., Aggarwal R., Aggarwal A.                                                                                                                                            | Evaluation of Canal Transportation and Centering Ability of Three Single File Systems                                                                                                 | 2022 | European Journal of Molecular and Clinical Medicine          |
| Obadiah I., Subramanian E.M.G., Ravindran V.                                                                                                                                     | Evaluation of carious primary teeth that causes swelling in children visiting a private dental institute-an observational study                                                       | 2020 | International Journal of Research in Pharmaceutical Sciences |
| Buonavoglia A.; Lauritano D.; Perrone D.; Ardito F.; Troiano G.; Dioguardi M.; Candotto V.; Silvestre F.J.; Muzio L.L.O.                                                         | Evaluation of chemical-physical properties & cytocompatibility of theracal LC                                                                                                         | 2017 | Journal of Biological Regulators and Homeostatic Agents      |
| Wu S.; Zhou Y.; Yu Y.; Zhou X.; Du W.; Wan M.; Fan Y.; Zhou X.; Xu X.; Zheng L.                                                                                                  | Evaluation of Chitosan Hydrogel for Sustained Delivery of VEGF for Odontogenic Differentiation of Dental Pulp Stem Cells                                                              | 2019 | Stem Cells International                                     |
| Kaushik S.N.; Scofield J.; Andukuri A.; Alexander G.C.; Walker T.; Kim S.; Choi S.C.; Brott B.C.; Eleazer P.D.; Lee J.-Y.; Wu H.; Childers N.K.; Jun H.-W.; Park J.-H.; Cheon K. | Evaluation of ciprofloxacin and metronidazole encapsulated biomimetic nanomatrix gel on Enterococcus faecalis and Treponema denticola                                                 | 2015 | Biomaterials Research                                        |
| Li Y.; Sun K.; Ye G.; Liang Y.; Pan H.; Wang G.; Zhao Y.; Pan J.; Zhang J.; Fang J.                                                                                              | Evaluation of Cold Plasma Treatment and Safety in Disinfecting 3-week Root Canal Enterococcus faecalis Biofilm in Vitro                                                               | 2015 | Journal of Endodontics                                       |
| Scotti N.; Alovisei C.; Comba A.; Ventura G.; Pasqualini D.; Grignolo F.; Berutti E.                                                                                             | Evaluation of Composite Adaptation to Pulpal Chamber Floor Using Optical Coherence Tomography                                                                                         | 2016 | Journal of Endodontics                                       |
| Paula A.B.; Laranjo M.; Marto C.-M.; Paulo S.; Abrantes A.M.; Fernandes B.; Casalta-Lopes J.; Marques-Ferreira M.; Botelho M.F.; Carrilho E.                                     | Evaluation of dentinogenesis inducer biomaterials: An in vivo study                                                                                                                   | 2020 | Journal of Applied Oral Science                              |
| Mandinić Z., Prokić A., Mandić J., Blagojević D., Kanjevac T., Stojković B., Stevanović M., Jovičić O.                                                                           | Evaluation of dentists' knowledge about the use of radiology in pediatric dentistry in Serbia                                                                                         | 2021 | Vojnosanitetski Pregled                                      |
| Balto H., Salama F., Al-Mofareh S., Al-Yahya F.                                                                                                                                  | Evaluation of different irrigating solutions on smear layer removal of primary root dentin                                                                                            | 2015 | The journal of contemporary dental practice                  |
| Alim B.A., Garip Berker Y.                                                                                                                                                       | Evaluation of different root canal filling techniques in severely curved canals by micro-computed tomography                                                                          | 2020 | Saudi Dental Journal                                         |
| Sunil N.S.B.M.A., Duraisamy R., Nasim I.                                                                                                                                         | Evaluation of direct/indirect pulp capping procedures requiring root canal therapy                                                                                                    | 2020 | Indian Journal of Forensic Medicine and Toxicology           |
| Ergesheva E.V., Davidiants A.A., Dorofeev A.E., Sevbitova M.A., Timoshina M.D.                                                                                                   | Evaluation of effectiveness of an alternative method in complex treatment of diseases of endodont                                                                                     | 2018 | Asian Journal of Pharmaceutics                               |
| Raheja J.; Tewari S.; Tewari S.; Duhan J.                                                                                                                                        | Evaluation of efficacy of chlorhexidine intracanal medicament on the periodontal healing of concomitant endodontic-periodontal lesions without communication: An interventional study | 2014 | Journal of Periodontology                                    |
| Sharma V.; Nawal R.R.; Augustine J.; Urs A.B.; Talwar S.                                                                                                                         | Evaluation of Endosequence Root Repair Material and Endocem MTA as direct pulp capping agents: An in vivo study                                                                       | 2022 | Australian Endodontic Journal                                |
| Varshney A.; Shetty A.; Hegde M.N.; Shetty S.; Rao L.N.                                                                                                                          | Evaluation of factors responsible for failure of root canal treatment in an adult indian population: A cross sectional study                                                          | 2019 | Indian Journal of Public Health Research and Development     |
| Yildiz E.; Tosun G.                                                                                                                                                              | Evaluation of formocresol, calcium hydroxide, ferric sulfate, and MTA primary molar pulpotomies                                                                                       | 2014 | European Journal of Dentistry                                |

|                                                                                                                         |                                                                                                                                                                                                            |      |                                                                 |
|-------------------------------------------------------------------------------------------------------------------------|------------------------------------------------------------------------------------------------------------------------------------------------------------------------------------------------------------|------|-----------------------------------------------------------------|
| Accorsi-Mendonça T.; Silva E.J.N.L.; Marcaccini A.M.; Gerlach R.F.; Duarte K.M.R.; Pardo A.P.S.; Line S.R.P.; Zaia A.A. | Evaluation of gelatinases, tissue inhibitor of matrix metalloproteinase-2, and myeloperoxidase protein in healthy and inflamed human dental pulp tissue                                                    | 2013 | Journal of Endodontics                                          |
| Tai Z.-W., Peng W.-W., Du R., Zhu Y.-Q.                                                                                 | Evaluation of glide path preparation and shaping ability of two nickel-titanium engine driven systems in moderate curved root canals                                                                       | 2020 | Journal of Shanghai Jiaotong University (Medical Science)       |
| Kirilova J., Topalova-Pirinska S., Kirov D.                                                                             | Evaluation of impact of lining application techniques on marginal microleakage in resin-modified glass ionomer cement in class II composite restorations: An in vitro study                                | 2019 | Journal of IMAB - Annual Proceeding (Scientific Papers)         |
| Astudillo-Ortiz E.; Babo P.S.; Reis R.L.; Gomes M.E.                                                                    | Evaluation of injectable hyaluronic acid-based hydrogels for endodontic tissue regeneration                                                                                                                | 2021 | Materials                                                       |
| Aishuwariya T.; Ramesh S.                                                                                               | Evaluation of interleukin 6, interleukin 8, tnf alpha as biomarkers for pulpitis-in vivo study                                                                                                             | 2021 | International Journal of Dentistry and Oral Science             |
| Altan Şallı G, Egil E.                                                                                                  | Evaluation of mesial root canal configuration of mandibular first molars using micro-computed tomography                                                                                                   | 2021 | Imaging Sci Dent                                                |
| Cavenago B.C., Del Carpio-Perochena A.E., Amoroso-Silva P.A., Alcalde M.P., Fernandes S.L., Vivan R.R., Duarte M.A.H.   | Evaluation of Mesial Root Canals of Mandibular Molars Obturated with Gutta-Percha and Resilon Techniques                                                                                                   | 2017 | European endodontic journal                                     |
| Meslmani W.; Othman R.; Kouchaji C.; Salem Rekab M.; Abo Fakher M.A.                                                    | Evaluation of modified portland cement versus mineral trioxide aggregate as a pulpotomy agent in primary molars: Histological study                                                                        | 2020 | International Journal of Dentistry and Oral Science             |
| Raja S.A.J.; Raja J.J.; Vijayashree R.; Priya B.M.; Anusuya G.S.; Ravishankar P.                                        | Evaluation of oral and periodontal status of leprosy patients in Dindigul district                                                                                                                         | 2016 | Journal of Pharmacy and Bioallied Sciences                      |
| Wadhwa J., Gupta A., Hans S.                                                                                            | Evaluation of periapical healing of apicomarginal defect in mandibular first molar treated with platelet rich fibrin: A case report                                                                        | 2017 | Journal of Clinical and Diagnostic Research                     |
| Daković D., Lekić M., Bokonjić D., Lazić Z., Čutović T., Mladenović R.                                                  | Evaluation of periodontal status and treatment needs of the Serbian Armed Forces population                                                                                                                | 2021 | Vojnosanitetski Pregled                                         |
| Atesci A.A.; Topaloglu-Ak A.; Turan E.; Oncag O.; Kaval M.E.                                                            | Evaluation of Postoperative Pain Following Single-Visit Root Canal Treatment with Rotary and Reciprocal Ni-Ti File Systems in Children                                                                     | 2022 | Medicina (Lithuania)                                            |
| Tunc F.; Yildirim C.; Alacam T.                                                                                         | Evaluation of postoperative pain/discomfort after intracanal use of Nd:YAG and diode lasers in patients with symptomatic irreversible pulpitis and asymptomatic necrotic pulps: a randomized control trial | 2021 | Clinical Oral Investigations                                    |
| Sankar P., Ravindran V.                                                                                                 | Evaluation of primary central incisors requiring restoration and pulpectomy in 2 to 6 year old children-an observational study                                                                             | 2020 | Indian Journal of Forensic Medicine and Toxicology              |
| Deepak A., Subramaniam E.M.G., Jeevanandan G., Jeevitha M.                                                              | Evaluation of primary teeth with caries requiring pulpectomy and extraction in children between 5-7 years old visiting a university dental hospital                                                        | 2020 | European Journal of Molecular and Clinical Medicine             |
| Lo Giudice A, Leonardi R, Ronsivalle V, Allegrini S, Lagravère M, Marzo G, Isola G.                                     | Evaluation of pulp cavity/chamber changes after tooth-borne and bone-borne rapid maxillary expansions: a CBCT study using surface-based superimposition and deviation analysis                             | 2021 | Clin Oral Investig                                              |
| Minic S, Florimond M, Sadoine J, Valot-Salengro A, Chaussain C, Renard E, Boukpepsi T.                                  | Evaluation of Pulp Repair after Biodentine(TM) Full Pulpotomy in a Rat Molar Model of Pulpitis                                                                                                             | 2021 | Biomedicines                                                    |
| Parvin MK, Moral AA, Shikder ZH, Alam MS, Bashar AM.                                                                    | Evaluation of Radiological Outcomes of Theracal Light Cured (TLC) And Calcium Hydroxide As Indirect Pulp Capping Agents In The Treatment Of Deep Carious Lesion Of Permanent Molar Teeth                   | 2018 | Mymensingh Med J                                                |
| Al-Hezaimi K.; Naghshbandi J.; Alhuzaimi R.; Alonazian F.; AlQwizany I.; Rotstein I.                                    | Evaluation of recombinant human platelet-derived growth factor or enamel matrix derivative plus calcium hydroxide for pulp capping: A randomized controlled human clinical trial                           | 2020 | International Journal of Periodontics and Restorative Dentistry |
| Vaishali S., Jeevanandan G., Duraisamy R.                                                                               | Evaluation of risk of periodontitis in children-a retrospective study                                                                                                                                      | 2020 | International Journal of Research in Pharmaceutical Sciences    |
| Guo J.; Vahidnia A.; Sedghizadeh P.; Enciso R.                                                                          | Evaluation of Root and Canal Morphology of Maxillary Permanent First Molars in a North American Population by Cone-beam Computed Tomography                                                                | 2014 | Journal of Endodontics                                          |

|                                                                                                                                                              |                                                                                                                                                                                                  |      |                                                                   |
|--------------------------------------------------------------------------------------------------------------------------------------------------------------|--------------------------------------------------------------------------------------------------------------------------------------------------------------------------------------------------|------|-------------------------------------------------------------------|
| Karthikeson P.S.; Gayathri R.; Vishnu Priya V.                                                                                                               | Evaluation of salivary total proteins, albumin, globulin, and A/G ratio among healthy individuals and patients with chronic pulpitis                                                             | 2018 | Drug Invention Today                                              |
| Timme M, Borkert J, Nagelmann N, Schmeling A.                                                                                                                | Evaluation of secondary dentin formation for forensic age assessment by means of semi-automatic segmented ultrahigh field 9.4 T UTE MRI datasets                                                 | 2020 | Int J Legal Med                                                   |
| Sooratgar A.; Ahmadi Z.; Asadi Y.; Dibaji F.; Shamshiri A.R.; Afkhami F.                                                                                     | Evaluation of Secondary Thermal Hyperalgesia Resulting from Pulpal Inflammation in Patients with Symptomatic Irreversible Pulpitis                                                               | 2021 | Journal of Endodontics                                            |
| Patel M.; Makwani D.; Bhatt R.; Raj V.; Patel C.; Patel F.                                                                                                   | Evaluation of silver-modified atraumatic restorative technique versus conventional pulp therapy in asymptomatic deep carious lesion of primary molars - A comparative prospective clinical study | 2022 | Journal of Indian Society of Pedodontics and Preventive Dentistry |
| Mandakhbayar N.; El-Fiqi A.; Lee J.-H.; Kim H.-W.                                                                                                            | Evaluation of Strontium-Doped Nanobioactive Glass Cement for Dentin-Pulp Complex Regeneration Therapy                                                                                            | 2019 | ACS Biomaterials Science and Engineering                          |
| Mbizah MM, Steenkamp G, Groom RJ.                                                                                                                            | Evaluation of the Applicability of Different Age Determination Methods for Estimating Age of the Endangered African Wild Dog ( <i>Lycaon Pictus</i> )                                            | 2016 | PLoS One                                                          |
| Kalaskar R, Baliga S, Balasubramanian S.                                                                                                                     | Evaluation of the average pulp cavity volume of primary second molar and canine for obturation of a single primary tooth: A preliminary cone-beam computed tomographic study                     | 2021 | J Indian Soc Pedod Prev Dent                                      |
| Cheng X.; Guan S.; Lu H.; Zhao C.; Chen X.; Li N.; Bai Q.; Tian Y.; Yu Q.                                                                                    | Evaluation of the bactericidal effect of Nd:YAG, Er:YAG, Er,Cr:YSGG laser radiation, and antimicrobial photodynamic therapy (aPDT) in experimentally infected root canals                        | 2012 | Lasers in Surgery and Medicine                                    |
| Erben P.; Chang A.M.; Darveau R.P.; Fong H.; Johnson J.D.; Paranjpe A.                                                                                       | Evaluation of the bactericidal potential of 2780-nm ER,Cr:YSGG and 940-nm diode lasers in the root canal system                                                                                  | 2019 | Lasers in Dental Science                                          |
| Akbiyik S.Y.; Bakir E.P.; Bakir S.                                                                                                                           | Evaluation of the Bond Strength of Different Pulp Capping Materials to Dental Adhesive Systems: An In Vitro Study                                                                                | 2021 | Journal of Advanced Oral Research                                 |
| Bakir Ş.; Bakir E.P.; Akbiyik S.Y.                                                                                                                           | Evaluation of the bond strength of resin-modified glass ionomer enhanced with bioactive glass to composite resin with different dental adhesive systems                                          | 2021 | Analytical and Quantitative Cytopathology and Histopathology      |
| Böttcher D.E.; Sehnem N.T.; Montagner F.; Fatturi Parolo C.C.; Grecca F.S.                                                                                   | Evaluation of the Effect of Enterococcus faecalis Biofilm on the 2% Chlorhexidine Substantivity: An In Vitro Study                                                                               | 2015 | Journal of Endodontics                                            |
| Khajehzadeh F., Raoufinejad F., Gorjestani H., Kamali M., Nassaj A.E., Shahravan A.                                                                          | Evaluation of the effect of furcation perforation on the fracture resistance of endodontically treated mandibular molars                                                                         | 2021 | Journal of Kerman University of Medical Sciences                  |
| da Mota A.C.C.; Gonçalves M.L.L.; Bortoletto C.; Olivani S.R.; Salgueiro M.; Godoy C.; Altavista O.M.; Pinto M.M.; Horliana A.C.; Motta L.J.; Bussadori S.K. | Evaluation of the effectiveness of photodynamic therapy for the endodontic treatment of primary teeth: Study protocol for a randomized controlled clinical trial                                 | 2015 | Trials                                                            |
| de Alencar Filho A.V.; dos Santos Junior V.E.; da Silva Calixto M.; Santos N.; Heimer M.V.; Rosenblatt A.                                                    | Evaluation of the genotoxic effects of formocresol application in vital pulp therapy of primary teeth: a clinical study and meta-analysis                                                        | 2018 | Clinical Oral Investigations                                      |
| Click V.; Drum M.; Reader A.; Nusstein J.; Beck M.                                                                                                           | Evaluation of the gox-gates and vazirani-Akinosi techniques in patients with symptomatic irreversible pulpitis: A prospective randomized study                                                   | 2015 | Journal of Endodontics                                            |
| Dongmei G., Fang S., Qi X.                                                                                                                                   | Evaluation of the number of roots and root canal morphology and distribution in chinese children's mandibular first deciduous teeth by cone-beam computed tomography                             | 2019 | Chinese Journal of Tissue Engineering Research                    |
| Mousivand S, Sheikhezami M, Moradi S, Koohestanian N, Jafarzadeh H.                                                                                          | Evaluation of the outcome of apexogenesis in traumatised anterior and carious posterior teeth using mineral trioxide aggregate: a 5-year retrospective study                                     | 2022 | Aust Endod J                                                      |
| Nováková D, Svec P, Kukletová M, Záchková L, Sedláček I.                                                                                                     | Evaluation of the strain identity between isolates from caries lesions and root canals in early childhood caries cases                                                                           | 2013 | Folia Microbiol (Praha)                                           |
| Sherwood I.; Divyameena B.; Ramyadharshini T.; Subashri V.; Banerjee A.                                                                                      | Evaluation of two conservative different treatment protocols for symptomatic proximal deep caries management in molar teeth; An 18-month clinical report                                         | 2021 | Endodontology                                                     |
| Nagaraja S.; Mathew S.; Abraham A.; Ramesh P.; Chandanala S.                                                                                                 | Evaluation of vascular endothelial growth factor - A release from platelet-rich fibrin, platelet-rich fibrin matrix, and dental pulp at different time intervals                                 | 2020 | Journal of Conservative Dentistry                                 |

|                                                                                                                                                                                                                         |                                                                                                                                                                                                             |      |                                                            |
|-------------------------------------------------------------------------------------------------------------------------------------------------------------------------------------------------------------------------|-------------------------------------------------------------------------------------------------------------------------------------------------------------------------------------------------------------|------|------------------------------------------------------------|
| Porto LV, Celestino da Silva Neto J, Anjos Pontual AD, Catunda RQ.                                                                                                                                                      | Evaluation of volumetric changes of teeth in a Brazilian population by using cone beam computed tomography                                                                                                  | 2015 | J Forensic Leg Med                                         |
| Bowler K.E.; Worsley M.A.; Broad L.; Sher E.; Benschop R.; Johnson K.; Yates J.M.; Robinson P.P.; Boissonade F.M.                                                                                                       | Evidence for anti-inflammatory and putative analgesic effects of a monoclonal antibody to calcitonin gene-related peptide                                                                                   | 2013 | Neuroscience                                               |
| Mahdee A, Eastham J, Whitworth JM, Gillespie JI.                                                                                                                                                                        | Evidence for changing nerve growth factor signalling mechanisms during development, maturation and ageing in the rat molar pulp                                                                             | 2019 | Int Endod J                                                |
| Lockhart P.B.; Tampi M.P.; Abt E.; Aminoshariae A.; Durkin M.J.; Fouad A.F.; Gopal P.; Hatten B.W.; Kennedy E.; Lang M.S.; Patton L.L.; Paumier T.; Suda K.J.; Pilcher L.; Urquhart O.; O'Brien K.K.; Carrasco-Labra A. | Evidence-based clinical practice guideline on antibiotic use for the urgent management of pulpal- and periapical-related dental pain and intraoral swelling: A report from the American Dental Association  | 2019 | Journal of the American Dental Association                 |
| Doméjean S, Grosogeat B.                                                                                                                                                                                                | Evidence-Based Deep Carious Lesion Management: From Concept to Application in Everyday Clinical Practice                                                                                                    | 2018 | Monogr Oral Sci                                            |
| Giacaman R.A., Muñoz-Sandoval C., Neuhaus K.W., Fontana M., Chalas R.                                                                                                                                                   | Evidence-based strategies for the minimally invasive treatment of carious lesions: Review of the literature                                                                                                 | 2018 | Advances in Clinical and Experimental Medicine             |
| Kurtzman G.M.                                                                                                                                                                                                           | Evolution of Comprehensive Care, Part 4. Direct Restorations                                                                                                                                                | 2015 | Dentistry today                                            |
| Averianov AO, Archibald JD.                                                                                                                                                                                             | Evolutionary transition of dental formula in Late Cretaceous eutherian mammals                                                                                                                              | 2015 | Naturwissenschaften                                        |
| Miranda R.G.; Santos E.B.; Souto R.M.; Gusman H.; Colombo A.P.V.                                                                                                                                                        | Ex vivo antimicrobial efficacy of the EndoVac® system plus photodynamic therapy associated with calcium hydroxide against intracanal Enterococcus faecalis                                                  | 2013 | International Endodontic Journal                           |
| Nascimento E.H.L.; Abrahão Elias M.R.; Vasconcelos V.H.F.; Haiter-Neto F.; Mendonça E.F.; Sousa T.O.                                                                                                                    | Ex Vivo Detection of Apical Delta in Premolars: A Comparative Study Using Periapical Radiography, Cone-beam Computed Tomography, and Micro-computed Tomography                                              | 2019 | Journal of Endodontics                                     |
| da Silva Paiva SM, Fontana CE, Pedro Rocha DG, de Martin AS, Delboni MG, da Silveira Bueno CE.                                                                                                                          | Ex Vivo Evaluation of Bacterial Leakage and Coronal Sealing Capacity of Six Materials in Endodontically Treated Teeth                                                                                       | 2022 | Iran Endod J                                               |
| Khan S.I.R., Ramachandran A., Alfadley A., Baskaradoss J.K.                                                                                                                                                             | Ex vivo fracture resistance of teeth restored with glass and fiber reinforced composite resin                                                                                                               | 2018 | Journal of the Mechanical Behavior of Biomedical Materials |
| Nascimento EHL, Abrahão Elias MR, Vasconcelos VHF, Haiter-Neto F, Mendonça EF, Sousa TO.                                                                                                                                | Ex Vivo Detection of Apical Delta in Premolars: A Comparative Study Using Periapical Radiography, Cone-beam Computed Tomography, and Micro-computed Tomography                                              | 2019 | J Endod                                                    |
| Li L.; Ge J.                                                                                                                                                                                                            | Exosome-derived lncRNA-Ankrd26 promotes dental pulp restoration by regulating miR-150-TLR4 signaling                                                                                                        | 2022 | Molecular Medicine Reports                                 |
| Yu S.; Chen X.; Liu Y.; Zhuang X.Y.; Wang A.C.; Liu X.M.; Zhu S.                                                                                                                                                        | Exosomes derived from stem cells from the apical papilla alleviate inflammation in rat pulpitis by upregulating regulatory T cells                                                                          | 2022 | International Endodontic Journal                           |
| Carminatti M.; Benetti F.; Siqueira R.L.; Zanotto E.D.; Briso A.L.F.; Chaves-Neto A.H.; Cintra L.T.A.                                                                                                                   | Experimental gel containing bioactive glass-ceramic to minimize the pulp damage caused by dental bleaching in rats                                                                                          | 2020 | Journal of Applied Oral Science                            |
| Vieira F.P.; Júnior A.G.; Piva E.; Oliveira H.D.L.; da Rosa W.L.D.O.; da Silva A.F.; Vitti R.P.; Zanchi C.H.; Cava S.D.S.                                                                                               | Experimental resin-based dual-cured calcium aluminate and calcium titanate materials for vital pulp therapy                                                                                                 | 2022 | Brazilian Oral Research                                    |
| Pedano M.S.; Yoshihara K.; Li X.; Camargo B.; Van Landuyt K.; Van Meerbeek B.                                                                                                                                           | Experimental resin-modified calcium-silicate cement containing N-(2-hydroxyethyl) acrylamide monomer for pulp tissue engineering                                                                            | 2021 | Materials Science and Engineering C                        |
| Taing M.-W.; Firth N.; Ford P.J.; Freeman C.R.                                                                                                                                                                          | Exploring oral healthcare management across Australian community pharmacies using case vignettes                                                                                                            | 2019 | Community Dentistry and Oral Epidemiology                  |
| Almaghrabi M.A.; Albadawi E.A.; Dahlan M.A.; Aljohani H.R.; Ahmed N.M.; Showlag R.A.                                                                                                                                    | Exploring Parent's Satisfaction and the Effectiveness of Preformed Metal Crowns Fitting by Hall Technique for Carious Primary Molars in Jeddah Region, Saudi Arabia: Findings of a Prospective Cohort Study | 2022 | Patient Preference and Adherence                           |
| He L.; Liu H.; Shi L.; Pan S.; Yang X.; Zhang L.; Niu Y.                                                                                                                                                                | Expression and localization of special AT-rich sequence binding protein 2 in murine molar development and the pulp-dentin complex of human healthy teeth and teeth with pulpitis                            | 2017 | Experimental and Therapeutic Medicine                      |

|                                                                                                                                                                    |                                                                                                                                                                         |      |                                             |
|--------------------------------------------------------------------------------------------------------------------------------------------------------------------|-------------------------------------------------------------------------------------------------------------------------------------------------------------------------|------|---------------------------------------------|
| Qi S.; Qian J.; Chen F.; Zhou P.; Yue J.; Tang F.; Zhang Y.; Gong S.; Shang G.; Cui C.; Xu Y.                                                                      | Expression of autophagy-associated proteins in rat dental irreversible pulpitis                                                                                         | 2019 | Molecular Medicine Reports                  |
| Castillo-Silva B.E.; Martínez-Jiménez V.; Martínezcastañón G.A.; Medina-Solís C.E.; Aguirre-López E.C.; Castillo-Hernández J.R.; Niño-Martínez N.; Patiño-Marín N. | Expression of calcitonin gene-related peptide and pulp sensitivity tests in irreversible pulpitis                                                                       | 2019 | Brazilian Oral Research                     |
| Wang L, Sun Z, Liu L, Peng B.                                                                                                                                      | Expression of CX3CL1 and its receptor, CX3CR1, in the development of periapical lesions                                                                                 | 2014 | Int Endod J                                 |
| Neto N.L.; Teixeira Marques N.C.; Fernandes A.P.; Rodini C.O.; Silva T.C.; Andrade Moreira Machado M.A.; Oliveira T.M.                                             | Expression of DMP-1 in the human pulp tissue using low level laser therapy                                                                                              | 2015 | Laser Physics                               |
| Le Clerc J.; Tricot-Doleux S.; Pellen-Mussi P.; Pérard M.; Jeanne S.; Pérez F.                                                                                     | Expression of factors involved in dental pulp physiopathological processes by nemotic human pulpal fibroblasts                                                          | 2018 | International Endodontic Journal            |
| Lv S.; Li J.; Feng W.; Liu H.; Du J.; Sun J.; Cui J.; Sun B.; Han X.; Oda K.; Amizuka N.; Xu X.; Li M.                                                             | Expression of HMGB1 in the periodontal tissue subjected to orthodontic force application by Waldo's method in mice                                                      | 2015 | Journal of Molecular Histology              |
| He M, Bian Z.                                                                                                                                                      | Expression of hypoxia-induced semaphorin 7A correlates with the severity of inflammation and osteoclastogenesis in experimentally induced periapical lesions            | 2017 | Arch Oral Biol                              |
| Daltoé M.O.; Paula-Silva F.W.G.; Faccioli L.H.; Gatón-Hernández P.M.; De Rossi A.; Silva L.A.B.                                                                    | Expression of mineralization markers during pulp response to biodentine and mineral trioxide aggregate                                                                  | 2016 | Journal of Endodontics                      |
| Sampoerno G.; Sunariani J.; Kuntaman                                                                                                                               | Expression of NaV-1.7, TNF- $\alpha$ and HSP-70 in experimental flare-up post-extirpated dental pulp tissue through a neuroimmunological approach                       | 2020 | Saudi Dental Journal                        |
| Kim Y.S.; Jung H.K.; Kwon T.K.; Kim C.S.; Cho J.H.; Ahn D.K.; Bae Y.C.                                                                                             | Expression of transient receptor potential Ankyrin 1 in human dental pulp                                                                                               | 2012 | Journal of Endodontics                      |
| Kim Y.S.; Kim T.H.; McKemy D.D.; Bae Y.C.                                                                                                                          | Expression of vesicular glutamate transporters in transient receptor potential melastatin 8 (TRPM8)-positive dental afferents in the mouse                              | 2015 | Neuroscience                                |
| Yang E.S.; Jin M.U.; Hong J.H.; Kim Y.S.; Choi S.Y.; Kim T.H.; Cho Y.S.; Bae Y.C.                                                                                  | Expression of vesicular glutamate transporters VGLUT1 and VGLUT2 in the rat dental pulp and trigeminal ganglion following inflammation                                  | 2014 | PLoS ONE                                    |
| Jungbluth H.; Brune L.; Lalaoui D.; Winter J.; Jepsen S.                                                                                                           | Expression Profiling of S100 Proteins in Healthy and Irreversibly Inflamed Human Dental Pulp                                                                            | 2022 | Journal of Endodontics                      |
| Bolhari B, Meraji N, Nosrat A.                                                                                                                                     | Extensive idiopathic external root resorption in first maxillary molar: a case report                                                                                   | 2013 | Iran Endod J                                |
| Zhang S.; Thiebes A.L.; Kreimendahl F.; Ruetten S.; Buhl E.M.; Wolf M.; Jockenhoewel S.; Apel C.                                                                   | Extracellular vesicles-loaded fibrin gel supports rapid neovascularization for dental pulp regeneration                                                                 | 2020 | International Journal of Molecular Sciences |
| Sebastian M.V.; Leavy P.                                                                                                                                           | Extra-oral cutaneous sinus tract secondary to chronic dental infection in an 8-year-old: An uncommon presentation leading to delayed diagnosis and subsequent treatment | 2021 | Journal of Paediatrics and Child Health     |
| Ricucci D.; Loghin S.; Siqueira Jr. J.F.                                                                                                                           | Exuberant biofilm infection in a lateral canal as the cause of short-term endodontic treatment failure: Report of a case                                                | 2013 | Journal of Endodontics                      |
| Hu Z.; Chen Y.; He J.; Liu H.; Hui T.                                                                                                                              | EZH2 Might Affect Macrophage Chemotaxis and Anti-Inflammatory Factors by Regulating CCL2 in Dental Pulp Inflammation                                                    | 2021 | Stem Cells International                    |
| He J.; Qin M.; Chen Y.; Hu Z.; Ye L.; Hui T.                                                                                                                       | EZH2 Promotes Extracellular Matrix Degradation via Nuclear Factor- $\kappa$ B (NF- $\kappa$ B) and p38 Signaling Pathways in Pulpitis                                   | 2021 | Inflammation                                |
| Hui T.; Peng A.; Zhao Y.; Yang J.; Ye L.; Wang C.                                                                                                                  | EZH2 regulates dental pulp inflammation by direct effect on inflammatory factors                                                                                        | 2018 | Archives of Oral Biology                    |
| Hui T.; Peng A.; Zhao Y.; Wang C.; Gao B.; Zhang P.; Wang J.; Zhou X.; Ye L.                                                                                       | EZH2, a potential regulator of dental pulp inflammation and regeneration                                                                                                | 2014 | Journal of Endodontics                      |
| Li Y.; Liang Q.; Lin C.; Li X.; Chen X.; Hu Q.                                                                                                                     | Facile synthesis and characterization of novel rapid-setting spherical sub-micron bioactive glasses cements and their biocompatibility in vitro                         | 2017 | Materials Science and Engineering C         |
| Aryal YP, Yeon CY, Kim TY, Lee ES, Sung S, Pokharel E, Kim JY, Choi SY,                                                                                            | Facilitating Reparative Dentin Formation Using Apigenin Local Delivery in the Exposed Pulp Cavity                                                                       | 2021 | Front Physiol                               |

|                                                                                                                                                                   |                                                                                                                                                    |      |                                                                                                              |
|-------------------------------------------------------------------------------------------------------------------------------------------------------------------|----------------------------------------------------------------------------------------------------------------------------------------------------|------|--------------------------------------------------------------------------------------------------------------|
| Yamamoto H, Sohn WJ, Lee Y, An SY, An CH, Jung JK, Ha JH, Kim JY.                                                                                                 |                                                                                                                                                    |      |                                                                                                              |
| Golpayegani M.V., Behnia H., Araghi M.A., Ansari G.                                                                                                               | Factor XIII deficiency, review of the literature and report of a case                                                                              | 2016 | Journal of Comprehensive Pediatrics                                                                          |
| El Batawi H.Y.                                                                                                                                                    | Factors affecting clinical outcome following treatment of early childhood caries under general anaesthesia: a two-year follow-up                   | 2014 | European archives of paediatric dentistry : official journal of the European Academy of Paediatric Dentistry |
| Nimako-Boateng J.; Owusu-Antwi M.; Nortey P.                                                                                                                      | Factors affecting dental diseases presenting at the University of Ghana Hospital                                                                   | 2016 | SpringerPlus                                                                                                 |
| Lipski M, Nowicka A, Kot K, Postek-Stefańska L, Wysoczańska-Jankowicz I, Borkowski L, Andersz P, Jarząbek A, Grocholewicz K, Sobolewska E, Woźniak K, Drożdżik A. | Factors affecting the outcomes of direct pulp capping using Biodentine                                                                             | 2018 | Clin Oral Investig                                                                                           |
| Duncan HF, El-Karim I, Dummer PMH, Whitworth J, Nagendrababu V.                                                                                                   | Factors that influence the outcome of pulpotomy in permanent teeth                                                                                 | 2023 | Int Endod J                                                                                                  |
| Lee C., Song M.                                                                                                                                                   | Failure of Regenerative Endodontic Procedures: Case Analysis and Subsequent Treatment Options                                                      | 2022 | Journal of endodontics                                                                                       |
| Sanusi S.Y.; Jamaludin S.A.; Al-Batayneh O.B.; Sinor M.Z.; Khamis M.F.                                                                                            | Fate of pulpotomized teeth in pediatric patients: A 3-year case series in a Malaysian Dental Teaching Hospital                                     | 2020 | International Journal of Clinical Pediatric Dentistry                                                        |
| Olczak-Kowalczyk D.; Samul M.; Góra J.; Gozdowski D.; Turska-Szybka A.                                                                                            | Ferric Sulfate and Formocresol pulpotomies in paediatric dental practice. A prospective- retrospective study                                       | 2019 | European Journal of Paediatric Dentistry                                                                     |
| El-Habashy L.M.; El Meligy O.A.                                                                                                                                   | Fiberglass crowns versus preformed metal crowns in pulpotomized primary molars: a randomized controlled clinical trial                             | 2020 | Quintessence international (Berlin, Germany : 1985)                                                          |
| Ducet M.; Costantini A.; Gobert S.; Farges J.-C.; Bekhouche M.                                                                                                    | Fibrin-based scaffolds for dental pulp regeneration: From biology to nanotherapeutics                                                              | 2021 | European Cells and Materials                                                                                 |
| Leite M.L.; Soares D.G.; Anovazzi G.; Anselmi C.; Hebling J.; de Souza Costa C.A.                                                                                 | Fibronectin-loaded Collagen/Gelatin Hydrogel Is a Potent Signaling Biomaterial for Dental Pulp Regeneration                                        | 2021 | Journal of Endodontics                                                                                       |
| Chien PY, Walsh LJ, Peters OA.                                                                                                                                    | Finite element analysis of rotary nickel-titanium endodontic instruments: A critical review of the methodology                                     | 2021 | Eur J Oral Sci                                                                                               |
| Cardoso J.G.; de Azevedo C.L.; Barroso A.P.; Marion J.J.C.; Duque T.M.; do Prado M.                                                                               | First mandibular premolar with three canals: Case report                                                                                           | 2017 | Dental Press Endodontics                                                                                     |
| Paul S.; Rao A.; Chalakkal P.; Moni S.                                                                                                                            | Fixed appliance with expansion screw for the treatment of primary anterior crossbite                                                               | 2016 | Journal of Clinical and Diagnostic Research                                                                  |
| Yonehiro J.; Yoshida Y.; Yamashita A.; Yoshizawa S.; Ohta K.; Kamata N.; Okihara T.; Nishimura F.                                                                 | Flavonol-containing phosphorylated pullulan may attenuate pulp inflammation                                                                        | 2013 | International Endodontic Journal                                                                             |
| Primožič P.K.; Žagar Ž.; Šmalc K.; Račnik J.; Švara T.; Nemec A.                                                                                                  | Follow Up on Simple (Closed) Extraction of Fractured Maxillary Canine Teeth in Domestic Ferrets ( <i>Mustela putorius furo</i> )                   | 2021 | Frontiers in Veterinary Science                                                                              |
| Llena C., Hernández M., Melo M., Sanz J.L., Forner L.                                                                                                             | Follow-up of patients subjected to direct and indirect pulp capping of young permanent teeth. A retrospective study                                | 2021 | Clinical and experimental dental research                                                                    |
| Balata G.F.; Abdelhady M.I.S.; Mahmoud G.M.; Matar M.A.; Abd El-Latif A.N.                                                                                        | Formulation of saudi propolis into biodegradable chitosan chips for vital pulpotomy                                                                | 2018 | Current Drug Delivery                                                                                        |
| Giorgini E.; Sabbatini S.; Conti C.; Rubini C.; Rocchetti R.; Fioroni M.; Memè L.; Orilisi G.                                                                     | Fourier Transform Infrared Imaging analysis of dental pulp inflammatory diseases                                                                   | 2017 | Oral Diseases                                                                                                |
| Li Y.; Wang H.; Pei F.; Chen Z.; Zhang L.                                                                                                                         | FoxO3a Regulates Inflammation-induced Autophagy in Odontoblasts                                                                                    | 2018 | Journal of Endodontics                                                                                       |
| Hasna AA, Pinto ABA, Coelho MS, de Andrade GS, Tribst JPM, de Castro Lopes SLP, Carvalho CAT, Borges ALS.                                                         | Fracture resistance and biomechanical behavior of different access cavities of maxillary central incisors restored with different composite resins | 2022 | Clin Oral Investig                                                                                           |
| Venkataraman K., Venkatapathi A., Balasubramanian S., Palanivelu C., Swaminathan S., Samuel L., Thanapathi S.                                                     | Fracture resistance of endodontically treated mandibular permanent first molars reinforced with diagonal horizontal postdesign: A in vitro study   | 2021 | Journal of Pharmacy and Bioallied Sciences                                                                   |

|                                                                                                                                                                                                                    |                                                                                                                                                                                                                                                                                                |      |                                                          |
|--------------------------------------------------------------------------------------------------------------------------------------------------------------------------------------------------------------------|------------------------------------------------------------------------------------------------------------------------------------------------------------------------------------------------------------------------------------------------------------------------------------------------|------|----------------------------------------------------------|
| Lucas T.J., Lawson N.C., Englert B., Goldstein K., Goldstein R.                                                                                                                                                    | Fracture strength of zirconia and lithium disilicate restorations following endodontic access                                                                                                                                                                                                  | 2022 | Journal of Esthetic and Restorative Dentistry            |
| Umesi D.C., Oremosu O.A., Makanjuola J.O., Nwachukwu N.C.                                                                                                                                                          | Frequency and distribution of teeth treated by single- and multiple- visit root canal treatment in a Nigerian population by differently skilled operators                                                                                                                                      | 2016 | Odonto-stomatologie tropicale = Tropical dental journal  |
| Bernal-Treviño A.; González-Amaro A.M.; Méndez González V.; Pozos-Guillen A.                                                                                                                                       | Frequency of Candida in root canals of teeth with primary and persistent endodontic infections; Frecuencia de Candida en conductos radiculares de dientes con infección endodóntica primaria y persistente                                                                                     | 2018 | Revista Iberoamericana de Micología                      |
| Boteva E.; Karayasheva D.; Peycheva K.                                                                                                                                                                             | Frequency of iatrogenic changes caused from overhang restorations                                                                                                                                                                                                                              | 2015 | Acta Medica Bulgarica                                    |
| Falcão C.A.; Albuquerque V.C.; Amorim N.L.; Freitas S.A.; Santos T.C.; Matos F.T.; Ferraz M.A.                                                                                                                     | Frequency of the mesiopalatal canal in upper first permanent molars viewed through computed tomography                                                                                                                                                                                         | 2016 | Acta odontologica latinoamericana : AOL                  |
| Mouawad S.; Artine S.; Hajjar P.; McConnell R.; Fahd J.-C.; Sabbagh J.                                                                                                                                             | Frequently asked questions in direct pulp capping of permanent teeth                                                                                                                                                                                                                           | 2014 | Dental Update                                            |
| Pedano M.S.; Li X.; Li S.; Sun Z.; Cokic S.M.; Putzeys E.; Yoshihara K.; Yoshida Y.; Chen Z.; Van Landuyt K.; Van Meerbeek B.                                                                                      | Freshly-mixed and setting calcium-silicate cements stimulate human dental pulp cells                                                                                                                                                                                                           | 2018 | Dental Materials                                         |
| Chevalier V, Le Fur Bonnabesse A, Duncan HF.                                                                                                                                                                       | Frightened of the pulp? A qualitative analysis of undergraduate student confidence and stress during the management of deep caries and the exposed pulp                                                                                                                                        | 2021 | Int Endod J                                              |
| Basutkar N., Alamoudi R.K., Alharbi R.M.                                                                                                                                                                           | Full mouth rehabilitation of a patient with restorative space issues-a case report                                                                                                                                                                                                             | 2020 | Asian Journal of Pharmaceutical Research and Health Care |
| Gada S., Nallaswamy D., Jain A.R.                                                                                                                                                                                  | Full mouth rehabilitation of periodontally compromised partially edentulous arches with multiple missing teeth using telescopic crown and bridge - A case report                                                                                                                               | 2018 | Drug Invention Today                                     |
| Taha N.A., Abdulkhader S.Z.                                                                                                                                                                                        | Full Pulpotomy with Biodentine in Symptomatic Young Permanent Teeth with Carious Exposure                                                                                                                                                                                                      | 2018 | Journal of endodontics                                   |
| Cristofanilli M.; Turner N.C.; Bondarenko I.; Ro J.; Im S.-A.; Masuda N.; Colleoni M.; DeMichele A.; Loi S.; Verma S.; Iwata H.; Harbeck N.; Zhang K.; Theall K.P.; Jiang Y.; Bartlett C.H.; Koehler M.; Slamon D. | Fulvestrant plus palbociclib versus fulvestrant plus placebo for treatment of hormone-receptor-positive, HER2-negative metastatic breast cancer that progressed on previous endocrine therapy (PALOMA-3): final analysis of the multicentre, double-blind, phase 3 randomised controlled trial | 2016 | The Lancet Oncology                                      |
| Cui S.-J.; Fu Y.; Yu M.; Zhang L.; Zhao W.-Y.; Zhang T.; Qiu L.-X.; Gu Y.; Zhou Y.-H.; Liu Y.                                                                                                                      | Functional periodontal regeneration using biomineralized extracellular matrix/stem cell microspheroids                                                                                                                                                                                         | 2022 | Chemical Engineering Journal                             |
| Ahn D.K.; Doutova E.A.; McNaughton K.; Light A.R.; Närhi M.; Maixner W.                                                                                                                                            | Functional properties of tooth pulp neurons responding to thermal stimulation                                                                                                                                                                                                                  | 2012 | Journal of Dental Research                               |
| Hosokawa Y.; Hirao K.; Yumoto H.; Washio A.; Nakanishi T.; Takegawa D.; Kitamura C.; Matsuo T.                                                                                                                     | Functional Roles of NOD1 in Odontoblasts on Dental Pulp Innate Immunity                                                                                                                                                                                                                        | 2016 | BioMed Research International                            |
| Piva E.; Silva A.F.; Nör J.E.                                                                                                                                                                                      | Functionalized scaffolds to control dental pulp stem cell fate                                                                                                                                                                                                                                 | 2014 | Journal of Endodontics                                   |
| Ben Salem M.; Chouchene F.; Masmoudi F.; Baaziz A.; Maatouk F.; Ghedira H.                                                                                                                                         | Fusion or Gemination? Diagnosis and Management in Primary Teeth: A Report of Two Cases                                                                                                                                                                                                         | 2021 | Case Reports in Dentistry                                |
| Kulakowski D, Phansalkar RM, Leme-Kraus AA, McAlpine J, Chen SN, Pauli GF, Ravindran S, Bedran-Russo AK.                                                                                                           | Galloylated proanthocyanidins in dentin matrix exhibit biocompatibility and induce differentiation in dental stem cells                                                                                                                                                                        | 2022 | J Bioact Compat Polym                                    |
| Venkatesh A., Mitthra S., Prakash V., Prasad T.S.                                                                                                                                                                  | Gemination or fusion?: A case report                                                                                                                                                                                                                                                           | 2016 | Biomedical and Pharmacology Journal                      |
| Ohkura N.; Shigetani Y.; Yoshida N.; Yoshida K.; Okiji T.                                                                                                                                                          | Gene expression analysis of membrane transport proteins in normal and lipopolysaccharide-inflamed rat dental pulp                                                                                                                                                                              | 2012 | Journal of Endodontics                                   |
| Hasan A, Roome T, Wahid M, Ansari SA, Akhtar H, Jilani SNA, Kiyani A.                                                                                                                                              | Gene expression analysis of toll like receptor 2 and 4, Dectin-1, Osteopontin and inflammatory cytokines in human dental pulp ex-vivo                                                                                                                                                          | 2022 | BMC Oral Health                                          |
| Xiao J.; Zheng Y.; Zhang W.; Zhang Y.; Cao P.; Liang Y.; Bao L.; Shi S.; Feng X.                                                                                                                                   | General Control Nonrepressed Protein 5 Modulates Odontogenic Differentiation Through NF- $\kappa$ B Pathway in Tumor Necrosis Factor- $\alpha$ -Mediated Impaired Human Dental Pulp Stem Cells                                                                                                 | 2022 | Cellular Reprogramming                                   |



|                                                                                                                                                                               |                                                                                                                                                               |      |                                                                                                 |
|-------------------------------------------------------------------------------------------------------------------------------------------------------------------------------|---------------------------------------------------------------------------------------------------------------------------------------------------------------|------|-------------------------------------------------------------------------------------------------|
| Ajith A.; Subbiah U.; Subbiah H.                                                                                                                                              | Genetic analysis in pain associated deep caries                                                                                                               | 2019 | Indian Journal of Public Health Research and Development                                        |
| Lucas Leite A.C.G.; Rosenblatt A.; Da Silva Calixto M.; Da Silva C.M.; Santos N.                                                                                              | Genotoxic effect of formocresol pulp therapy of deciduous teeth                                                                                               | 2012 | Mutation Research - Genetic Toxicology and Environmental Mutagenesis                            |
| Chen G.; Sung P.-T.                                                                                                                                                           | Gingival and localized alveolar bone necrosis related to the use of arsenic trioxide paste—Two case reports                                                   | 2014 | Journal of the Formosan Medical Association                                                     |
| Sesiliana M.; Riyanti E.                                                                                                                                                      | Giomer s-prg technology as an alternative restoration in early childhood caries                                                                               | 2021 | World Journal of Dentistry                                                                      |
| Singhal I., Dave A., Arora M., Saluja P.                                                                                                                                      | Glandular odontogenic cyst - An unusual presentation in the maxilla                                                                                           | 2021 | Journal of Clinical and Diagnostic Research                                                     |
| Xiao N.; Yu W.Y.; Liu D.                                                                                                                                                      | Glial cell-derived neurotrophic factor promotes dental pulp stem cell migration                                                                               | 2018 | Journal of Tissue Engineering and Regenerative Medicine                                         |
| Tohma A, Ohkura N, Yoshida K, Takeuchi R, Yoshida N, Edanami N, Shirakashi M, Ibn Belal RS, Ohshima H, Noiri Y.                                                               | Glucose Transporter 2 and 4 Are Involved in Glucose Supply during Pulpal Wound Healing after Pulpotomy with Mineral Trioxide Aggregate in Rat Molars          | 2020 | J Endod                                                                                         |
| Piccin A., Tagnin M., Vecchiato C., Al-Khaffaf A., Beqiri L., Kaiser C., Agreiter I., Negri G., Kob M., Di Pierro A., Vittadello F., Mazzoleni G., Eisendle K., Fontanella F. | Graft-versus-host disease (GvHD) of the tongue and of the oral cavity: a large retrospective study                                                            | 2018 | International Journal of Hematology                                                             |
| Sun N.; Yin S.; Lu Y.; Zhang W.; Jiang X.                                                                                                                                     | Graphene oxide-coated porous titanium for pulp sealing: An antibacterial and dentin-inductive restorative material                                            | 2020 | Journal of Materials Chemistry B                                                                |
| Casey M.B.; Pearson G.R.; Perkins J.D.; Tremaine W.H.                                                                                                                         | Gross, computed tomographic and histological findings in mandibular cheek teeth extracted from horses with clinical signs of pulpitis due to apical infection | 2015 | Equine Veterinary Journal                                                                       |
| Zhang T., Chen D., Miao L.-Y., Xie S.-J., Tang X.-N.                                                                                                                          | Guided endodontic access of calcified root canal by laser melting templates                                                                                   | 2020 | Hua xi kou qiang yi xue za zhi = Huaxi kouqiang yixue zazhi = West China journal of stomatology |
| Krug R.; Volland J.; Reich S.; Soliman S.; Connert T.; Krastl G.                                                                                                              | Guided endodontic treatment of multiple teeth with dentin dysplasia: a case report                                                                            | 2020 | Head and Face Medicine                                                                          |
| Gonçalves W.F., Garcia L.D.F.R., Vieira-Schuldt D.P., Bortoluzzi E.A., Dias-Júnior L.C.L., Teixeira C.D.S.                                                                    | Guided Endodontics in Root Canals with Complex Access: Two Case Reports                                                                                       | 2021 | Brazilian dental journal                                                                        |
| Leontiev W, Connert T, Weiger R, Dagassan-Berndt D, Krastl G, Magni E.                                                                                                        | Guided Endodontics: Three-dimensional Planning and Template-aided Preparation of Endodontic Access Cavities                                                   | 2022 | J Vis Exp                                                                                       |
| Loureiro MAZ, Elias MRA, Capeletti LR, Silva JA, Siqueira PC, Chaves GS, Decurcio DA.                                                                                         | Guided Endodontics: Volume of Dental Tissue Removed by Guided Access Cavity Preparation—An Ex Vivo Study                                                      | 2020 | J Endod                                                                                         |
| Duarte Campos D.F.; Zhang S.; Kreimendahl F.; Köpf M.; Fischer H.; Vogt M.; Blaeser A.; Apel C.; Esteves-Oliveira M.                                                          | Hand-held bioprinting for de novo vascular formation applicable to dental pulp regeneration                                                                   | 2020 | Connective Tissue Research                                                                      |
| El-Zekrid M.H.; Mahmoud S.H.; Ali F.A.; Helal M.E.; Grawish M.E.                                                                                                              | Healing Capacity of Autologous Bone Marrow–derived Mesenchymal Stem Cells on Partially Pulpotomized Dogs' Teeth                                               | 2019 | Journal of Endodontics                                                                          |
| Sharma L.A.; Love R.M.; Ali M.A.; Sharma A.; Macari S.; Avadhani A.; Dias G.J.                                                                                                | Healing response of rat pulp treated with an injectable keratin hydrogel                                                                                      | 2017 | Journal of Applied Biomaterials and Functional Materials                                        |
| Dahake PT, Thosar N, Hande A, Joshi DA, Bhagat A.                                                                                                                             | Hematological and Biochemical Responses of Newly Formulated Primary Root Canal Obturating Material: An In Vivo Study                                          | 2022 | Cureus                                                                                          |
| Rajasekar P., Mithra S., Malarvizhi D., Subbiya A.                                                                                                                            | Hemisection of mandibular first molar: Clinical management—a case report                                                                                      | 2019 | Indian Journal of Public Health Research and Development                                        |
| Han Y.; Koohi-Moghadam M.; Chen Q.; Zhang L.; Chopra H.; Zhang J.; Dissanayaka W.L.                                                                                           | HIF-1 $\alpha$ Stabilization Boosts Pulp Regeneration by Modulating Cell Metabolism                                                                           | 2022 | Journal of Dental Research                                                                      |
| Asghari M.; Nasoohi N.; Hodjat M.                                                                                                                                             | High glucose promotes the aging of human dental pulp cells through Wnt/beta-catenin signaling                                                                 | 2021 | Dental and Medical Problems                                                                     |

|                                                                                                                                                   |                                                                                                                                                                                                                                                                                                                          |      |                                                     |
|---------------------------------------------------------------------------------------------------------------------------------------------------|--------------------------------------------------------------------------------------------------------------------------------------------------------------------------------------------------------------------------------------------------------------------------------------------------------------------------|------|-----------------------------------------------------|
| Colombo J.S.; Malik H.; Caranto C.A.; Allen P.K.; Howard J.; Carlson K.                                                                           | Highly targeted electrochemical disruption of microbes with minimal disruption to pulp cells                                                                                                                                                                                                                             | 2022 | Journal of Dentistry                                |
| Liu L, Deng J, Ji Q, Peng B.                                                                                                                      | High-mobility Group Box 1 Is Associated with the Inflammatory Infiltration and Alveolar Bone Destruction in Rats Experimental Periapical Lesions                                                                                                                                                                         | 2017 | J Endod                                             |
| Kushnerev E.; Shawcross S.G.; Hillarby M.C.; Yates J.M.                                                                                           | High-plasticity mesenchymal stem cells isolated from adult-retained primary teeth and autogenous adult tooth pulp - A potential source for regenerative therapies?                                                                                                                                                       | 2016 | Archives of Oral Biology                            |
| Wu Y.; Zhou C.; Tong X.; Li S.; Liu J.                                                                                                            | Histochemical localization of putative stem cells in irreversible pulpitis                                                                                                                                                                                                                                               | 2022 | Oral Diseases                                       |
| Lin L.M.; Shimizu E.; Gibbs J.L.; Loghin S.; Ricucci D.                                                                                           | Histologic and histobacteriologic observations of failed revascularization/revitalization therapy: A case report                                                                                                                                                                                                         | 2014 | Journal of Endodontics                              |
| Woodmansey K.F.; Kohout G.D.; Primus C.M.; Schneiderman E.; Opperman L.A.                                                                         | Histologic assessment of quick-set and mineral trioxide aggregate pulpotomies in a canine model                                                                                                                                                                                                                          | 2015 | Journal of Endodontics                              |
| Lazzaretti D.N.; Bortoluzzi G.S.; Torres Fernandes L.F.; Rodriguez R.; Grehs R.A.; Martins Hartmann M.S.                                          | Histologic evaluation of human pulp tissue after orthodontic intrusion                                                                                                                                                                                                                                                   | 2014 | Journal of Endodontics                              |
| Peng C.; Zhao Y.; Wang W.; Yang Y.; Qin M.; Ge L.                                                                                                 | Histologic Findings of a Human Immature Revascularized/Regenerated Tooth with Symptomatic Irreversible Pulpitis                                                                                                                                                                                                          | 2017 | Journal of Endodontics                              |
| Shimizu E.; Jong G.; Partridge N.; Rosenberg P.A.; Lin L.M.                                                                                       | Histologic observation of a human immature permanent tooth with irreversible pulpitis after revascularization/regeneration procedure                                                                                                                                                                                     | 2012 | Journal of Endodontics                              |
| Ricucci D.; Grande N.M.; Plotino G.; Tay F.R.                                                                                                     | Histologic Response of Human Pulp and Periapical Tissues to Tricalcium Silicate-based Materials: A Series of Successfully Treated Cases                                                                                                                                                                                  | 2020 | Journal of Endodontics                              |
| Mehrdad L, Malekafzali B, Shekarchi F, Safi Y, Asgary S.                                                                                          | Histological and CBCT evaluation of a pulpotomised primary molar using calcium enriched mixture cement                                                                                                                                                                                                                   | 2013 | Eur Arch Paediatr Dent                              |
| Lourenco-Neto N.; Marques N.C.T.; Prado M.T.O.; Vitor L.L.R.; Rodini C.O.; Machado M.A.A.M.; Oliveira T.M.                                        | Histological and cd31 immunolocalization after pulp therapy using mta or portland cement                                                                                                                                                                                                                                 | 2018 | International Journal of Dentistry and Oral Science |
| Puşcaşu C.G.; Ştefănescu C.L.; Murineanu R.M.; Grigorian M.; Petcu L.C.; Dumea E.; Sachelarie L.; Puşcaşu R.A.                                    | Histological aspects regarding dental pulp of diabetic patients                                                                                                                                                                                                                                                          | 2021 | Applied Sciences (Switzerland)                      |
| Mohammad S.G.; Raheel S.A.; Baroudi K.                                                                                                            | Histological Evaluation of Allium sativum Oil as a New Medicament for Pulp Treatment of Permanent Teeth                                                                                                                                                                                                                  | 2015 | The journal of contemporary dental practice         |
| Suzuki M.; Taira Y.; Kato C.; Shinkai K.; Katoh Y.                                                                                                | Histological evaluation of direct pulp capping of rat pulp with experimentally developed low-viscosity adhesives containing reparative dentin-promoting agents                                                                                                                                                           | 2016 | Journal of Dentistry                                |
| Hadi R.J.; AL-Ghaban N.M.H.                                                                                                                       | HISTOLOGICAL EVALUATION OF PULP RESPONSE TO IN-OFFICE BLEACHING TECHNIQUE IN RATS                                                                                                                                                                                                                                        | 2020 | Biochemical and Cellular Archives                   |
| Cupertino R.R.; Fabri F.V.; Veltrini V.C.; Hidalgo M.M.; Bruschi M.L.; de Oliveira R.M.M.W.                                                       | Histological evaluation of the rat dental pulp after indirect capping with sildenafil or L-NAME incorporated into a bioadhesive thermoresponsive system; Avaliação histológica da polpa dental do rato após capeamento pulpar indireto usando sildenafil ou L-NAME incorporados a um sistema bioadesivo termorresponsivo | 2016 | Acta Scientiarum - Health Sciences                  |
| Walsh R.M.; Woodmansey K.F.; He J.; Svoboda K.K.; Primus C.M.; Opperman L.A.                                                                      | Histology of NeoMTA Plus and Quick-Set2 in Contact with Pulp and Periradicular Tissues in a Canine Model                                                                                                                                                                                                                 | 2018 | Journal of Endodontics                              |
| Li M.; Tian J.; Xu Z.; Zeng Q.; Chen W.; Lei S.; Wei X.                                                                                           | Histology-based profile of inflammatory mediators in experimentally induced pulpitis in a rat model: screening for possible biomarkers                                                                                                                                                                                   | 2021 | International Endodontic Journal                    |
| Madani ZS, Haddadi A, Mesgarani A, Seyedmajidi M, Mostafazadeh A, Bijani A, Ashraphpour M.                                                        | Histopathologic Responses of the Dental Pulp to Calcium-Enriched Mixture (CEM) and Mineral Trioxide Aggregate (MTA) in Diabetic and Non-Diabetic Rats                                                                                                                                                                    | 2014 | Int J Mol Cell Med                                  |
| Tobias Duarte P.C.; Gomes-Filho J.E.; Ervolino E.; Marçal Mazza Sundefeld M.L.; Tadahirowayama M.; Lodi C.S.; Dezan-Júnior E.; Angelo Cintra L.T. | Histopathological condition of the remaining tissues after endodontic infection of rat immature teeth                                                                                                                                                                                                                    | 2014 | Journal of Endodontics                              |

|                                                                                                                                                                                                                                                                                                    |                                                                                                                                                                            |      |                                                                        |
|----------------------------------------------------------------------------------------------------------------------------------------------------------------------------------------------------------------------------------------------------------------------------------------------------|----------------------------------------------------------------------------------------------------------------------------------------------------------------------------|------|------------------------------------------------------------------------|
| Oliadarani F.K.; Haghgoo R.; Mashhadiabbas F.; Kahvand M.                                                                                                                                                                                                                                          | Histopathological evaluation of dental pulp of primary teeth pulpotomized with formocresol with/without a capping agent: A randomized clinical trial                       | 2018 | Journal of International Society of Preventive and Community Dentistry |
| Alzoubi H.; Bshara N.; AL-Manadili A.                                                                                                                                                                                                                                                              | Histopathological evaluation of pulp response to portland cement compared to MTA after primary canines pulpotomy (in vivo study)                                           | 2022 | BDJ Open                                                               |
| Sousa M.G.C.; Xavier P.D.; Cantuária A.P.D.C.; Porcino R.A.; Almeida J.A.; Franco O.L.; Rezende T.M.B.                                                                                                                                                                                             | Host defense peptide IDR-1002 associated with ciprofloxacin as a new antimicrobial and immunomodulatory strategy for dental pulp revascularization therapy                 | 2021 | Microbial Pathogenesis                                                 |
| Al Masri A, Abudrya MEH, Splieth CH, Schmoedel J, Mourad MS, Santamaría RM.                                                                                                                                                                                                                        | How did the COVID-19 pandemic lockdown affect dental emergency care in children? Retrospective study in a specialized pedodontic center                                    | 2021 | Quintessence Int                                                       |
| Careddu R.; Duncan H.F.                                                                                                                                                                                                                                                                            | How does the pulpal response to biodentine and proroot mineral trioxide aggregate compare in the laboratory and clinic?                                                    | 2018 | British Dental Journal                                                 |
| Chompu-Inwai P.; Sutharaphan T.; Nirunsittirat A.; Chuveera P.; Srisuwan T.; Sastraruji T.                                                                                                                                                                                                         | How effective are inferior alveolar nerve block and supplemental intraligamentary injections in pediatric patients with deep carious permanent mandibular molars?          | 2018 | Pediatric Dentistry                                                    |
| Edwards D, Bailey O, Stone SJ, Duncan H.                                                                                                                                                                                                                                                           | How is carious pulp exposure and symptomatic irreversible pulpitis managed in UK primary dental care?                                                                      | 2021 | Int Endod J                                                            |
| Splieth CH, Banerjee A, Bottenberg P, Breschi L, Campus G, Ekstrand KR, Giacaman RA, Haak R, Hannig M, Hickel R, Juric H, Lussi A, Machiulskiene V, Manton DJ, Jablonski-Momeni A, Opdam NJM, Paris S, Santamaría RM, Schwendicke F, Tassery H, Ferreira Zandona A, Zero DT, Zimmer S, Doméjean S. | How to Intervene in the Caries Process in Children: A Joint ORCA and EFCD Expert Delphi Consensus Statement                                                                | 2020 | Caries Res                                                             |
| Santamaría RM, Abudrya MH, Gül G, Mourad MS, Gomez GF, Zandona AGF.                                                                                                                                                                                                                                | How to Intervene in the Caries Process: Dentin Caries in Primary Teeth                                                                                                     | 2020 | Caries Res                                                             |
| Sugiuchi A.; Sano Y.; Furusawa M.; Abe S.; Muramatsu T.                                                                                                                                                                                                                                            | Human Dental Pulp Cells Express Cellular Markers for Inflammation and Hard Tissue Formation in Response to Bacterial Information                                           | 2018 | Journal of Endodontics                                                 |
| Ahmadi P.; Yan M.; Bauche A.; Smeets R.; Müller C.E.; Koch-Nolte F.; Haag F.; Fliegert R.; Kluwe L.; Schulze zur Wiesch J.; Hartjen P.                                                                                                                                                             | Human dental pulp cells modulate CD8+ T cell proliferation and efficiently degrade extracellular ATP to adenosine in vitro                                                 | 2022 | Cellular Immunology                                                    |
| Manaspon C.; Jongwannasiri C.; Chumprasert S.; Sa-Ard-Iam N.; Mahanonda R.; Pavasant P.; Porntaveetut T.; Osathanon T.                                                                                                                                                                             | Human dental pulp stem cell responses to different dental pulp capping materials                                                                                           | 2021 | BMC Oral Health                                                        |
| Lam C.; Alsaedi H.A.; Koh A.E.-H.; Harun M.H.N.; Hwei A.N.M.; Mok P.L.; Luu C.D.; Yong T.K.; Subbiah S.K.; Bastion M.-L.C.                                                                                                                                                                         | Human Dental Pulp Stem Cells (DPSCs) Therapy in Rescuing Photoreceptors and Establishing a Sodium Iodate-Induced Retinal Degeneration Rat Model                            | 2021 | Tissue Engineering and Regenerative Medicine                           |
| Al-Serwi R.H.; El-Kersh A.O.F.O.; El-Akabawy G.                                                                                                                                                                                                                                                    | Human dental pulp stem cells attenuate streptozotocin-induced parotid gland injury in rats                                                                                 | 2021 | Stem Cell Research and Therapy                                         |
| Tran H.L.B.; Doan V.N.                                                                                                                                                                                                                                                                             | Human dental pulp stem cells cultured onto dentin derived scaffold can regenerate dentin-like tissue in vivo                                                               | 2015 | Cell and Tissue Banking                                                |
| Janowicz K.; Mozdziak P.; Bryja A.; Kempisty B.; Dyszkiewicz-Konwińska M.                                                                                                                                                                                                                          | Human Dental Pulp Stem Cells: Recent findings and current research                                                                                                         | 2019 | Medical Journal of Cell Biology                                        |
| De Souza P.V.; Alves F.B.T.; Costa Ayub C.L.S.; De Miranda Soares M.A.; Gomes J.R.                                                                                                                                                                                                                 | Human immature dental pulp stem cells (hiDPSCs), their application to cell therapy and bioengineering: An analysis by systematic revision of the last decade of literature | 2013 | Anatomical Record                                                      |
| Bimstein E, Damm D.                                                                                                                                                                                                                                                                                | Human Primary Tooth Histology Six Months after Treatment with Silver Diamine Fluoride                                                                                      | 2018 | J Clin Pediatr Dent                                                    |
| Bakhtiar H.; Nekoofar M.H.; Aminishakib P.; Abedi F.; Naghi Moosavi F.; Esnaashari E.; Azizi A.; Esmailian S.; Ellini M.R.; Mesgarzadeh V.; Sezavar M.; About I.                                                                                                                                   | Human Pulp Responses to Partial Pulpotomy Treatment with TheraCal as Compared with Biodentine and ProRoot MTA: A Clinical Trial                                            | 2017 | Journal of Endodontics                                                 |
| Umemura N.; Ohkoshi E.; Tajima M.; Kikuchi H.; Katayama T.; Sakagami H.                                                                                                                                                                                                                            | Hyaluronan induces odontoblastic differentiation of dental pulp stem cells via CD44                                                                                        | 2016 | Stem Cell Research and Therapy                                         |

|                                                                                                                                       |                                                                                                                                                                                       |      |                                                       |
|---------------------------------------------------------------------------------------------------------------------------------------|---------------------------------------------------------------------------------------------------------------------------------------------------------------------------------------|------|-------------------------------------------------------|
| Haghani J.; Haghani F.; Soleimani A.; Abbasnejad M.; Khodami M.; Kooshki R.; Raoof M.                                                 | Hydroalcoholic extracts of three Artemisia species attenuate dental pulp pain and pain-related abnormal feeding behavior of rats                                                      | 2022 | Iranian Journal of Veterinary Science and Technology  |
| Saghiri M.A.; Asatourian A.; Nguyen E.H.; Wang S.; Sheibani N.                                                                        | Hydrogel Arrays and Choroidal Neovascularization Models for Evaluation of Angiogenic Activity of Vital Pulp Therapy Biomaterials                                                      | 2018 | Journal of Endodontics                                |
| Yeh C.-K.; Harris S.E.; Mohan S.; Horn D.; Fajardo R.; Chun Y.-H.P.; Jorgensen J.; MacDougall M.; Abboud-Werner S.                    | Hyperglycemia and xerostomia are key determinants of tooth decay in type 1 diabetic mice                                                                                              | 2012 | Laboratory Investigation                              |
| Ye X, Zhang J, Yang P.                                                                                                                | Hyperlipidemia induced by high-fat diet enhances dentin formation and delays dentin mineralization in mouse incisor                                                                   | 2016 | J Mol Histol                                          |
| Pérez Jardón A., Otero Gayoso N., Otero. Rey E.M., Guerra Caamaño M., Chamorro-Petronacci C.M., Blanco Carrión A., Rivas Mundiña B.   | Hyperplastic Pulpitis Management with Endocrown: A Case Report                                                                                                                        | 2022 | Open Dentistry Journal                                |
| Yamada M.; Nagayama M.; Katsumata A.; Kawano S.; Gen K.; Ehara M.; Nakao J.; Tanuma J.-I.; Yoshida T.                                 | Hypomineralized Enamel of Dens Invaginatus: Its distinct images and pathogenesis of the type III invagination using micro-focusing computed tomography                                | 2014 | Journal of Hard Tissue Biology                        |
| Zhu S.; Ying Y.; He Y.; Zhong X.; Ye J.; Huang Z.; Chen M.; Wu Q.; Zhang Y.; Xiang Z.; Tu Y.; Ying W.; Xiao J.; Li X.; Ye Q.; Wang Z. | Hypoxia response element-directed expression of bFGF in dental pulp stem cells improve the hypoxic environment by targeting pericytes in SCI rats                                     | 2021 | Bioactive Materials                                   |
| Liu Y.; Chen L.; Gong Q.; Jiang H.; Huang Y.                                                                                          | Hypoxia-induced mitophagy regulates proliferation, migration and odontoblastic differentiation of human dental pulp cells through FUN14 domain-containing 1                           | 2022 | International Journal of Molecular Medicine           |
| Wu Y.; Huang F.; Zhou X.; Yu S.; Tang Q.; Li S.; Wang J.; Chen L.                                                                     | Hypoxic Preconditioning Enhances Dental Pulp Stem Cell Therapy for Infection-Caused Bone Destruction                                                                                  | 2016 | Tissue Engineering - Part A                           |
| Issrani R., Prabhu N.K., Alam M.                                                                                                      | Iatrogenic injury of facial skin due to formocresol: A case report                                                                                                                    | 2020 | Journal of Cutaneous and Aesthetic Surgery            |
| Watts K.; Balzer S.; Drum M.; Nusstein J.; Reader A.; Fowler S.; Beck M.                                                              | Ibuprofen and Acetaminophen Versus Intranasal Ketorolac (Sprix) in an Untreated Endodontic Pain Model: A Randomized, Double-blind Investigation                                       | 2019 | Journal of Endodontics                                |
| Sakthivel M.; Ayyasamy P.M.; Arvind Prasanth D.                                                                                       | Identification and antimicrobial susceptibility testing of pathogenic micro-organism from dental patients                                                                             | 2016 | Asian Journal of Pharmaceutical and Clinical Research |
| Wang J.; Wei X.; Ling J.; Huang Y.; Gong Q.; Huo Y.                                                                                   | Identification and characterization of side population cells from adult human dental pulp after ischemic culture                                                                      | 2012 | Journal of Endodontics                                |
| Ray A.; Kundabala M.; Shetty N.                                                                                                       | IDENTIFICATION AND MANAGEMENT OF MESIO-CENTRAL CANAL IN MANDIBULAR FIRST MOLAR: A CASE REPORT                                                                                         | 2021 | International Journal of Clinical Dentistry           |
| Al-Natour B.; Rankin R.; McKenna R.; McMillan H.; Zhang S.-D.; About I.; Khan A.A.; Galicia J.C.; Lundy F.T.; El-Karim I.A.           | Identification and validation of novel biomarkers and therapeutics for pulpitis using connectivity mapping                                                                            | 2021 | International Endodontic Journal                      |
| Rostinawati T.; Hadisoebroto S.; Iskandar Y.; Nugroho P.H.; Tara A.A.                                                                 | Identification of bacteria causing necrotic pulp with 16S rRNA gene polymerase chain reaction and antibiotic resistance testing at the dental hospital in sekeloa, bandung, indonesia | 2017 | Asian Journal of Pharmaceutical and Clinical Research |
| Benyó B.                                                                                                                              | Identification of dental root canals and their medial line from micro-CT and cone-beam CT records                                                                                     | 2012 | BioMedical Engineering Online                         |
| Zargar N.; Ashraf H.; Marashi S.M.A.; Sabeti M.; Aziz A.                                                                              | Identification of microorganisms in irreversible pulpitis and primary endodontic infections with respect to clinical and radiographic findings                                        | 2020 | Clinical Oral Investigations                          |
| Matsumura S.; Quispe-Salcedo A.; Schiller C.M.; Shin J.S.; Locke B.M.; Yakar S.; Shimizu E.                                           | IGF-1 Mediates EphrinB1 Activation in Regulating Tertiary Dentin Formation                                                                                                            | 2017 | Journal of Dental Research                            |
| Li J.; Diao S.; Yang H.; Cao Y.; Du J.; Yang D.                                                                                       | IGFBP5 promotes angiogenic and neurogenic differentiation potential of dental pulp stem cells                                                                                         | 2019 | Development Growth and Differentiation                |
| Xiong H.; Wei L.; Peng B.                                                                                                             | IL-17 stimulates the production of the inflammatory chemokines IL-6 and IL-8 in human dental pulp fibroblasts                                                                         | 2015 | International Endodontic Journal                      |
| Limjeeararus C.N.; Chanarattanubol T.; Trongkij P.; Rujiwanichkul M.; Pavasant P.                                                     | Iloprost induces tertiary dentin formation                                                                                                                                            | 2014 | Journal of Endodontics                                |

|                                                                                                                                                                                                                                                                                                                     |                                                                                                                                                                    |      |                                                         |
|---------------------------------------------------------------------------------------------------------------------------------------------------------------------------------------------------------------------------------------------------------------------------------------------------------------------|--------------------------------------------------------------------------------------------------------------------------------------------------------------------|------|---------------------------------------------------------|
| Limjeerajarus C.N.; Osathanon T.; Manokawinchoke J.; Pavasant P.                                                                                                                                                                                                                                                    | Iloprost up-regulates vascular endothelial growth factor expression in human dental pulp cells in vitro and enhances pulpal blood flow in vivo                     | 2014 | Journal of Endodontics                                  |
| Park M.; Ahn B.D.                                                                                                                                                                                                                                                                                                   | Immature permanent teeth with apical periodontitis and abscess treated by regenerative endodontic treatment using calcium hydroxide and MTA: a report of two cases | 2014 | Pediatric dentistry                                     |
| Marques N.C.T.; Lourenço Neto N.; Oliveira T.M.                                                                                                                                                                                                                                                                     | Immediate and mediate furcal perforation treatment in primary molars: 24-month follow-up                                                                           | 2016 | European Archives of Paediatric Dentistry               |
| Keles S.; Kocaturk O.                                                                                                                                                                                                                                                                                               | Immediate Postoperative Pain and Recovery Time after Pulpotomy Performed under General Anaesthesia in Young Children                                               | 2017 | Pain Research and Management                            |
| Bashar A.K.M.; Kabir A.K.M.N.; Rizdina R.A.; Shikder A.H.M.Z.H.; Ghosh R.; Rahman M.M.                                                                                                                                                                                                                              | Immediate response of human dental pulp capped with mineral trioxide aggregate, portland cement and biodentin                                                      | 2019 | Bangladesh Medical Research Council Bulletin            |
| Grandi T., Figliuzzi M.M., Signorini L.                                                                                                                                                                                                                                                                             | Immediately restored single post extractive implants: clinical outcomes of a retrospective analysis with 8-10 years follow-up                                      | 2022 | Journal of Biological Regulators and Homeostatic Agents |
| Renard E.; Gaudin A.; Bienvenu G.; Amiaud J.; Farges J.C.; Cuturi M.C.; Moreau A.; Alliot-Licht B.                                                                                                                                                                                                                  | Immune Cells and Molecular Networks in Experimentally Induced Pulpitis                                                                                             | 2016 | Journal of Dental Research                              |
| Durutürk L.; Sari Ş.; Şengül A.                                                                                                                                                                                                                                                                                     | Immunocompetent cell level as a diagnostic reference for pulpal pathosis of primary teeth                                                                          | 2013 | Archives of Oral Biology                                |
| Manolea H.; Vasile N.; Opri M.; Fronie A.; Popescu M.R.                                                                                                                                                                                                                                                             | Immunohistochemical and electron microscopy aspects of the nerve structures from the dental pulp                                                                   | 2014 | Romanian Journal of Morphology and Embryology           |
| Chisini L.A.; Conde M.C.M.; Alcázar J.C.B.; da Silva A.F.; Nör J.E.; Tarquinio S.B.C.; Demarco F.F.                                                                                                                                                                                                                 | Immunohistochemical Expression of TGF-β1 and Osteonectin in engineered and Ca(OH)2-repaired human pulp tissues                                                     | 2016 | Brazilian Oral Research                                 |
| Liu S, Li Q, Liu Y.                                                                                                                                                                                                                                                                                                 | Immunohistochemical localization of NALP3 inflammasome in experimental periapical lesions                                                                          | 2014 | Int Endod J                                             |
| Dinakar G.; Ganesh A.; Prem Kumar M.S.; Sabesan M.; Narasimhan M.; Deivanayagam K.                                                                                                                                                                                                                                  | Immunohistochemical quantification of mast cells in inflamed and noninflamed pulp tissue                                                                           | 2018 | Journal of Oral and Maxillofacial Pathology             |
| Takeuchi R, Ohkura N, Yoshida K, Tohma A, Yoshida N, Edanami N, Shirakashi M, Belal RS, Ohshima H, Noiri Y.                                                                                                                                                                                                         | Immunohistochemistry and gene expression of GLUT1, RUNX2 and MTOR in reparative dentinogenesis                                                                     | 2020 | Oral Dis                                                |
| Jamshidi D., Homayouni H., Moradi Majd N., Shahabi S., Arvin A., Ranjbar Omid B.                                                                                                                                                                                                                                    | Impact and Fracture Strength of Simulated Immature Teeth Treated with Mineral Trioxide Aggregate Apical Plug and Fiber Post Versus Revascularization               | 2018 | Journal of endodontics                                  |
| Jain N., Garg S., Dhindsa A., Joshi S., Khatria H.                                                                                                                                                                                                                                                                  | Impact of 6% citric acid and endoactivator as irrigation adjuncts on obturation quality and pulpectomy outcome in primary teeth                                    | 2019 | Pediatric Dental Journal                                |
| Ribeiro I.L.A., Bellissimo-Rodrigues W.T., Mussolin M.G., Innocentini L.M.A.R., Marangoni A.T.D., Macedo L.D., Barbosa-Júnior F., de Souza H.C.C., Meneguetti M.G., Pereira A.P.S., Gaspar G.G., Schmidt A., Miranda C.H., Lovato W.J., Puga M.L., Auxiliadora-Martins M., Basile-Filho A., Bellissimo-Rodrigues F. | Impact of a dental care intervention on the hospital mortality of critically ill patients admitted to intensive care units: A quasi-experimental study             | 2022 | American Journal of Infection Control                   |
| Silva EJNL, Rover G, Belladonna FG, De-Deus G, da Silveira Teixeira C, da Silva Fidalgo TK.                                                                                                                                                                                                                         | Impact of contracted endodontic cavities on fracture resistance of endodontically treated teeth: a systematic review of in vitro studies                           | 2018 | Clin Oral Investig                                      |
| dos Santos M.B.F.; Pires A.L.C.; Saporiti J.M.; Kinalski M.D.A.; Marchini L.                                                                                                                                                                                                                                        | Impact of COVID-19 pandemic on oral health procedures provided by the Brazilian public health system: COVID-19 and oral health in Brazil                           | 2021 | Health Policy and Technology                            |
| Beazoglou T.J.; Bailit H.L.; DeVitto J.; McGowan T.; Myne-Joslin V.                                                                                                                                                                                                                                                 | Impact of dental therapists on productivity and finances: II. Federally qualified health centers                                                                   | 2012 | Journal of Dental Education                             |
| Emfietzoglou R, Pachymanolis E, Piperi C.                                                                                                                                                                                                                                                                           | Impact of Epigenetic Alterations in the Development of Oral Diseases                                                                                               | 2021 | Curr Med Chem                                           |
| Ramos-Jorge J, Pordeus IA, Ramos-Jorge ML, Marques LS, Paiva SM.                                                                                                                                                                                                                                                    | Impact of untreated dental caries on quality of life of preschool children: different stages and activity                                                          | 2014 | Community Dent Oral Epidemiol                           |

|                                                                                                                                   |                                                                                                                                                                                                                                                                                                                      |      |                                                                   |
|-----------------------------------------------------------------------------------------------------------------------------------|----------------------------------------------------------------------------------------------------------------------------------------------------------------------------------------------------------------------------------------------------------------------------------------------------------------------|------|-------------------------------------------------------------------|
| Xia J.; Wang W.; Li Z.; Lin B.; Zhang Q.; Jiang Q.; Yang X.                                                                       | Impacts of contracted endodontic cavities compared to traditional endodontic cavities in premolars                                                                                                                                                                                                                   | 2020 | BMC Oral Health                                                   |
| Marchesan MA, Lloyd A, Clement DJ, McFarland JD, Friedman S.                                                                      | Impacts of Contracted Endodontic Cavities on Primary Root Canal Curvature Parameters in Mandibular Molars                                                                                                                                                                                                            | 2018 | J Endod                                                           |
| Sueyama Y.; Kaneko T.; Ito T.; Kaneko R.; Okiji T.                                                                                | Implantation of Endothelial Cells with Mesenchymal Stem Cells Accelerates Dental Pulp Tissue Regeneration/Healing in Pulpotomized Rat Molars                                                                                                                                                                         | 2017 | Journal of Endodontics                                            |
| Gafforov S.A.; Yarieva O.O.                                                                                                       | Importance of medical and social factors in etiology of carious and non-carious diseases of children                                                                                                                                                                                                                 | 2019 | International Journal of Pharmaceutical Research                  |
| Baghdadi Z.D.                                                                                                                     | Improving oral health status of children in Tabuk, Saudi Arabia                                                                                                                                                                                                                                                      | 2014 | Dentistry Journal                                                 |
| Cantekin K, Gumus H.                                                                                                              | In vitro and clinical outcome of sandwich restorations with a bulk-fill flowable composite liner for pulpotomized primary teeth                                                                                                                                                                                      | 2014 | J Clin Pediatr Dent                                               |
| Silva J.C.; Rifane T.O.; Ferreira-Junior A.E.; Alves A.P.; Miron R.; Zhang Y.; Fechine P.B.A.; Carvalho E.V.; Feitosa V.P.        | In Vitro and in Vivo Efficacy of New Composite for Direct Pulp Capping                                                                                                                                                                                                                                               | 2021 | BioMed Research International                                     |
| De Castilho A.R.F.; Duque C.; Negrini T.D.C.; Sacono N.T.; De Paula A.B.; Costa C.A.D.S.; Spolidório D.M.P.; Puppini-Rontani R.M. | In vitro and in vivo investigation of the biological and mechanical behaviour of resin-modified glass-ionomer cement containing chlorhexidine                                                                                                                                                                        | 2013 | Journal of Dentistry                                              |
| Pourhajibagher M., Ranjbar Omrani L., Noroozian M., Ghorbanzadeh Z., Bahador A.                                                   | In vitro antibacterial activity and durability of a nano-curcumin-containing pulp capping agent combined with antimicrobial photodynamic therapy                                                                                                                                                                     | 2021 | Photodiagnosis and Photodynamic Therapy                           |
| Dimitrova-Nakov S.; Uzunoglu E.; Ardila-Osorio H.; Baudry A.; Richard G.; Kellermann O.; Goldberg M.                              | In vitro bioactivity of Bioroot™ RCS, via A4 mouse pulpal stem cells                                                                                                                                                                                                                                                 | 2015 | Dental Materials                                                  |
| Elbanna A.; Atta D.; Sherief D.                                                                                                   | In vitro bioactivity of newly introduced dual-cured resin-modified calcium silicate cement                                                                                                                                                                                                                           | 2022 | Dental Research Journal                                           |
| Zarean P.; Roozbeh R.; Zarean P.; Jahromi M.Z.; Broujeni P.M.                                                                     | In vitro comparison of shear bond strength of a flowable composite resin and a single-component glass-ionomer to three different pulp-capping agents; Porównanie in vitro wytrzymałości na ścinanie wiązania płynnej żywicy kompozytowej i jednoskładnikowego szkło-jonomeru z trzema materiałami do pokrycia miazgi | 2019 | Dental and Medical Problems                                       |
| Bulbule A.; Mandroli P.; Bhat K.; Bogar C.                                                                                        | In vitro evaluation of cytotoxicity of Emblica officinalis (amla) on cultured human primary dental pulp fibroblasts                                                                                                                                                                                                  | 2019 | Journal of Indian Society of Pedodontics and Preventive Dentistry |
| Li W.; Mao M.; Hu N.; Wang J.; Huang J.; Gu S.                                                                                    | In vitro evaluation of periapical lesion-derived stem cells for dental pulp tissue engineering                                                                                                                                                                                                                       | 2022 | FEBS Open Bio                                                     |
| Ghahramani Y.; Ghaffaripour D.; Mohammadi N.                                                                                      | In vitro evaluation of the fracture resistance of biodentine pulpotomized primary molars restored with different dental materials                                                                                                                                                                                    | 2019 | World Journal of Dentistry                                        |
| Al-Haj Ali S.N.; Al-Jundi S.H.; Ditto D.J.                                                                                        | In vitro toxicity of formocresol, ferric sulphate, and grey MTA on human periodontal ligament fibroblasts                                                                                                                                                                                                            | 2015 | European Archives of Paediatric Dentistry                         |
| Al-Haj Ali S.N.; Al-Jundi S.H.; Ditto D.J.                                                                                        | In vitro toxicity of grey MTA in comparison to white MTA on human periodontal ligament fibroblasts                                                                                                                                                                                                                   | 2014 | European Archives of Paediatric Dentistry                         |
| Tanapitchpong R, Chunhacheevachaloke E, Ajcharanukul O.                                                                           | In vivo and in vitro study of enamel fluid flow in human premolars                                                                                                                                                                                                                                                   | 2020 | Arch Oral Biol                                                    |
| Tampelini FG, Coelho MS, Rios MA, Fontana CE, Rocha DGP, Pinheiro SL, Bueno CEDS.                                                 | In vivo assessment of accuracy of Propex II, Root ZX II, and radiographic measurements for location of the major foramen                                                                                                                                                                                             | 2017 | Restor Dent Endod                                                 |
| Opal S.; Garg S.; Sharma D.; Dhindsa A.; Jatana I.                                                                                | In vivo effect of calcium hydroxide and resin-modified glass ionomer cement on carious dentin in young permanent molars: An ultrastructural and macroscopic study                                                                                                                                                    | 2017 | Pediatric Dentistry                                               |
| Nguyen V.; Chen Y.-W.; Johnson J.D.; Paranjpe A.                                                                                  | In Vivo Evaluation of Effect of Preoperative Ibuprofen on Proinflammatory Mediators in Irreversible Pulpitis Cases                                                                                                                                                                                                   | 2020 | Journal of Endodontics                                            |
| Jaya A.R.; Praveen P.; Anantharaj A.; Venkataraghavan K.; Prathibha Rani S.                                                       | In vivo evaluation of lesion sterilization and tissue repair in primary teeth pulp therapy using two antibiotic drug combinations                                                                                                                                                                                    | 2012 | Journal of Clinical Pediatric Dentistry                           |
| Moreira M.S.; Diniz I.M.; Rodrigues M.F.S.D.; de Carvalho R.A.; de Almeida                                                        | In vivo experimental model of orthotopic dental pulp regeneration under the influence of photobiomodulation therapy                                                                                                                                                                                                  | 2017 | Journal of Photochemistry and Photobiology B: Biology             |

|                                                                                                                                      |                                                                                                                                                                                     |      |                                                          |
|--------------------------------------------------------------------------------------------------------------------------------------|-------------------------------------------------------------------------------------------------------------------------------------------------------------------------------------|------|----------------------------------------------------------|
| Carrer F.C.; Neves I.I.; Gavini G.; Marques M.M.                                                                                     |                                                                                                                                                                                     |      |                                                          |
| Kaneko T.; Sone P.P.; Zaw S.Y.M.; Sueyama Y.; Zaw Z.C.T.; Okada Y.; Murano H.; Gu B.; Okiji T.                                       | In vivo fate of bone marrow mesenchymal stem cells implanted into rat pulpotomized molars                                                                                           | 2019 | Stem Cell Research                                       |
| Hsiao J, Wang Y, Zheng L, Liu R, Said R, Hadjiyski L, Cha H, Botero T, Chatzistavrou X, Dong Q, Papagerakis S, Papagerakis P.        | In Vivo Rodent Models for Studying Dental Caries and Pulp Disease                                                                                                                   | 2019 | Methods Mol Biol                                         |
| Ramachandran P.; PradeepKumar A.R.; Ravishankar P.; Kishen A.                                                                        | In Vivo Strain Alterations in Mandibular Molars after Root Canal Treatment Procedures                                                                                               | 2020 | Journal of Endodontics                                   |
| Benetti F.; Briso A.L.F.; Ferreira L.L.; Carminatti M.; Álamo L.; Ervolino E.; Dezan-Júnior E.; Cintra L.T.A.                        | In vivo study of the action of a topical anti-inflammatory drug in rat teeth submitted to dental bleaching                                                                          | 2018 | Brazilian Dental Journal                                 |
| Runnacles P, Arrais CA, Pochapski MT, Dos Santos FA, Coelho U, Gomes JC, De Goes MF, Gomes OM, Rueggeberg FA.                        | In vivo temperature rise in anesthetized human pulp during exposure to a polywave LED light curing unit                                                                             | 2015 | Dent Mater                                               |
| Del Fabbro M, Afrashtehfar KI, Corbella S, El-Kabbaney A, Perondi I, Taschieri S.                                                    | In Vivo and In Vitro Effectiveness of Rotary Nickel-Titanium vs Manual Stainless Steel Instruments for Root Canal Therapy: Systematic Review and Meta-analysis                      | 2018 | J Evid Based Dent Pract                                  |
| Ramachandran P, PradeepKumar AR, Ravishankar P, Kishen A.                                                                            | In Vivo Strain Alterations in Mandibular Molars after Root Canal Treatment Procedures                                                                                               | 2020 | J Endod                                                  |
| Kapoor K.; Grewal M.S.; Arya A.; Grewal S.; Prasad Shetty K.                                                                         | Incidence of Postoperative Pain after Single Visit Root Canal Treatment using XP-endo Shaper, 2Shape and ProTaper Gold Rotary Systems: A Prospective Randomized Clinical Trial      | 2022 | European Endodontic Journal                              |
| Wu S.; Lew H.P.; Chen N.N.                                                                                                           | Incidence of Pulpal Complications after Diagnosis of Vital Cracked Teeth                                                                                                            | 2019 | Journal of Endodontics                                   |
| Maltz M, Alves L.S.                                                                                                                  | Incomplete caries removal significantly reduces the risk of pulp exposure and post-operative pulpal symptoms                                                                        | 2013 | J Evid Based Dent Pract                                  |
| Camargo C.H.R.; Gomes L.C.L.; França M.C.M.; Bittencourt T.S.; Valera M.C.; Camargo S.E.A.; Bottino M.C.                             | Incorporating N-acetylcysteine and tricalcium phosphate into epoxy resin-based sealer improved its biocompatibility and adhesiveness to radicular dentine                           | 2019 | Dental Materials                                         |
| Wang H.S.; Pei F.; Chen Z.; Zhang L.                                                                                                 | Increased apoptosis of inflamed odontoblasts is associated with CD47 loss                                                                                                           | 2016 | Journal of Dental Research                               |
| Lu M.-C.; Jheng C.-H.; Tsai T.-Y.; Koo M.; Lai N.-S.                                                                                 | Increased dental visits in patients prior to diagnosis of primary Sjögren's syndrome: a population-based study in Taiwan                                                            | 2014 | Rheumatology International                               |
| Juan C.-Y.; Hsu C.-W.; Lu M.-C.                                                                                                      | Increased dental visits in patients with rheumatoid arthritis: a secondary cohort analysis of population based claims data                                                          | 2022 | BMC Oral Health                                          |
| Dong Y.; Lan W.; Wu W.; Huang Z.; Zhao J.; Peng L.; Wang J.                                                                          | Increased expression of epha7 in inflamed human dental pulp                                                                                                                         | 2013 | Journal of Endodontics                                   |
| Almeida P.N.; Barboza D.D.N.; Luna E.B.; Correia M.C.D.M.; Dias R.B.; Siquara De Sousa A.C.; Duarte M.E.L.; Rossi M.I.D.; Cunha K.S. | Increased extracellular matrix deposition during chondrogenic differentiation of dental pulp stem cells from individuals with neurofibromatosis type 1: An in vitro 2D and 3D study | 2018 | Orphanet Journal of Rare Diseases                        |
| Mehri-Ghahfarrokhi A.; Pourteymourfard-Tabrizi Z.; Farrokhi E.; Chaleshtori M.H.; Jami M.-S.                                         | Increased levels of miR-124 in human dental pulp stem cells alter the expression of neural markers                                                                                  | 2019 | Journal of Otology                                       |
| Chuang C.-J.; Hsu C.-W.; Lu M.-C.; Koo M.                                                                                            | Increased risk of developing dental diseases in patients with primary Sjögren's syndrome-A secondary cohort analysis of population-based claims data                                | 2020 | PLoS ONE                                                 |
| Sheth P.P., Lodayekar N.V., Hegde A.M.                                                                                               | Indian journal of public health research & development, may 2020, vol. 11, no. 05 341 use of biodentine(tm) for vital pulp therapy in children: Three case reports                  | 2020 | Indian Journal of Public Health Research and Development |
| Sebring D.; Kvist T.; Derks J.                                                                                                       | Indications for Extraction before Implant Therapy: Focus on Endodontic Status                                                                                                       | 2019 | Journal of Endodontics                                   |
| Wigsten E, Jonasson P; EndoReCo; Kvist T.                                                                                            | Indications for root canal treatment in a Swedish county dental service: patient- and tooth-specific characteristics                                                                | 2019 | Int Endod J                                              |
| Du W, Yang M, Kim T, Kim S, Williams DW, Esmaeili M, Hong C, Shin KH, Kang MK, Park NH, Kim RH.                                      | Indigenous microbiota protects development of medication-related osteonecrosis induced by periapical disease in mice                                                                | 2022 | Int J Oral Sci                                           |
| Smail-Faugeron V, Porot A, Muller-Bolla M, Courson F.                                                                                | Indirect pulp capping versus pulpotomy for treating deep carious lesions approaching the pulp in primary teeth: a systematic review                                                 | 2016 | Eur J Paediatr Dent                                      |

|                                                                                                                            |                                                                                                                                                        |      |                                             |
|----------------------------------------------------------------------------------------------------------------------------|--------------------------------------------------------------------------------------------------------------------------------------------------------|------|---------------------------------------------|
| Wu S, Liu YL, Zou J, Zhou XD, Zheng LW.                                                                                    | Indirect pulp therapy for deciduous teeth with deep caries lesions                                                                                     | 2018 | Hua Xi Kou Qiang Yi Xue Za Zhi              |
| Trairatvorakul C, Sastararuij T.                                                                                           | Indirect pulp treatment vs antibiotic sterilization of deep caries in mandibular primary molars                                                        | 2014 | Int J Paediatr Dent                         |
| Angelopoulou MV, Koletsi D, Vadiakas G, Halazonetis DJ.                                                                    | Induced ankylosis of a primary molar for skeletal anchorage in the mandible as alternative to mini-implants                                            | 2015 | Prog Orthod                                 |
| Fonzar F.; Forner L.; Fabian-Fonzar R.; Llena C.                                                                           | Induced post-traumatic apexification: 20 year follow-up and morphological study after new fracture                                                     | 2018 | Annals of Anatomy                           |
| Bacaksiz A, Alaçam A.                                                                                                      | Induction of maturogenesis by partial pulpotomy: 1 year follow-up                                                                                      | 2013 | Case Rep Dent                               |
| Koike T.; Polan M.A.A.; Izumikawa M.; Saito T.                                                                             | Induction of reparative dentin formation on exposed dental pulp by dentin phosphophoryn/collagen composite                                             | 2014 | BioMed Research International               |
| Camoin A, Tardieu C, Dany L, Saliba-Serre B, Faulks D, Coz PL.                                                             | Inequalities in treatment planning for children with intellectual disabilities: A questionnaire study of dentists in Europe                            | 2020 | Spec Care Dentist                           |
| Kidd E, Fejerskov O, Nyvad B.                                                                                              | Infected Dentine Revisited                                                                                                                             | 2015 | Dent Update                                 |
| Maisonneuve E.; Chevrier J.; Dubus M.; Varin J.; Sergheraert J.; Gangloff S.C.; Reffuveille F.; Mauprivez C.; Kerdjoudj H. | Infection of Human Dental Pulp Stromal Cells by Streptococcus mutans: Shedding Light on Bacteria Pathogenicity and Pulp Inflammation                   | 2020 | Frontiers in Cell and Developmental Biology |
| Cooper P.R.; Holder M.J.; Smith A.J.                                                                                       | Inflammation and regeneration in the dentin-pulp complex: A double-edged sword                                                                         | 2014 | Journal of Endodontics                      |
| Leng S.; Liu L.; Xu W.; Yang F.; Du J.; Ye L.; Huang D.; Zhang L.                                                          | Inflammation down regulates stromal cell-derived factor 1 $\alpha$ in the early phase of pulpitis                                                      | 2022 | Cytokine                                    |
| Erdek Ö.; Bloch W.; Rink-Notzon S.; Roggendorf H.C.; Uzun S.; Meul B.; Koch M.; Neugebauer J.; Deschner J.; Korkmaz Y.     | Inflammation of the Human Dental Pulp Induces Phosphorylation of eNOS at Thr495 in Blood Vessels                                                       | 2022 | Biomedicines                                |
| Huang X.; Liu F.; Hou J.; Chen K.                                                                                          | Inflammation-induced overexpression of microRNA-223-3p regulates odontoblastic differentiation of human dental pulp stem cells by targeting SMAD3      | 2019 | International Endodontic Journal            |
| Brizuela C.; Meza G.; Mercadé M.; Inostroza C.; Chaparro A.; Bravo I.; Briceño C.; Hernández M.; Giner L.; Ramírez V.      | Inflammatory biomarkers in dentinal fluid as an approach to molecular diagnostics in pulpitis                                                          | 2020 | International Endodontic Journal            |
| Esmeraldo M.R.A.; de Carvalho M.G.F.; de Carvalho R.A.; de Freitas Lima R.; de Brito Costa E.M.M.                          | Inflammatory effect of green propolis on dental pulp in rats                                                                                           | 2013 | Brazilian Oral Research                     |
| Galler KM, Weber M, Korkmaz Y, Widbiller M, Feuerer M.                                                                     | Inflammatory Response Mechanisms of the Dentine-Pulp Complex and the Periapical Tissues                                                                | 2021 | Int J Mol Sci                               |
| Vaz M.M.; Lopes L.G.; Cardoso P.C.; de Souza J.B.; Batista A.C.; Costa N.L.; Torres É.M.; Estrela C.                       | Inflammatory response of human dental pulp to at-home and in-office tooth bleaching                                                                    | 2016 | Journal of Applied Oral Science             |
| Vieira-Andrade R.G.; Drumond C.L.; Alves L.P.A.; Ramos-Jorge M.A.; Marques L.S.                                            | Inflammatory root resorption in primary molars: Prevalence and associated factors                                                                      | 2012 | Brazilian Oral Research                     |
| Berbari R.; Nassif N.; Sfeir E.                                                                                            | Inflammatory Status of Excavated Pulp Tissue and Internal Root Resorption in Pulpotomized Primary Molars                                               | 2022 | Journal of Dentistry (Iran)                 |
| Galvani L.D.; Costa J.L.D.S.G.; Besegato J.F.; Zaniboni J.F.; Escalante-Otárola W.G.; Kuga M.C.                            | Influence of agitation methods of irrigants after methylene blue-mediated PDT on the bonding interface of a fiber post cementation system              | 2022 | Photodiagnosis and Photodynamic Therapy     |
| Pawar R.; Alqaied A.; Safavi K.; Boyko J.; Kaufman B.                                                                      | Influence of an apical negative pressure irrigation system on bacterial elimination during endodontic therapy: A prospective randomized clinical study | 2012 | Journal of Endodontics                      |
| Bamini L.; Anand Sherwood I.; Abbott P.V.; Uthandakalaipandian R.; Velu V.                                                 | Influence of anti-inflammatory irrigant on substance P expression for single-visit root canal treatment of teeth with irreversible pulpitis            | 2020 | Australian Endodontic Journal               |
| Jara CM, Hartmann RC, Böttcher DE, Souza TS, Gomes MS, Figueiredo JAP.                                                     | Influence of apical enlargement on the repair of apical periodontitis in rats                                                                          | 2018 | Int Endod J                                 |
| Zarpellon DC, Runnacles P, Maucoski C, Gross DJ, Coelho U, Rueggeberg FA, Arrais CAG.                                      | Influence of Class V preparation on in vivo temperature rise in anesthetized human pulp during exposure to a Polywave(®) LED light curing unit         | 2018 | Dent Mater                                  |



|                                                                                                                                                                   |                                                                                                                                                                         |      |                                                                                                         |
|-------------------------------------------------------------------------------------------------------------------------------------------------------------------|-------------------------------------------------------------------------------------------------------------------------------------------------------------------------|------|---------------------------------------------------------------------------------------------------------|
| Vendramini V.O.; Pouraghaei S.; Barbosa R.M.; Aloise A.C.; Muniz J.R.F.; Sperandio M.; Moy P.K.; Pelegrine A.A.; Moshaverinia A.                                  | Influence of Dental Pulp Harvesting Method on the Viability and Differentiation Capacity of Adult Dental Pulp-Derived Mesenchymal Stem Cells                            | 2021 | Stem Cells International                                                                                |
| Evangelin J.; Sherwood I.A.; Abbott P.V.; Uthandakalaipandian R.; Velu V.                                                                                         | Influence of different irrigants on substance P and IL-8 expression for single visit root canal treatment in acute irreversible pulpitis                                | 2020 | Australian Endodontic Journal                                                                           |
| de Oliveira Duque C.C.; Soares D.G.; Basso F.G.; Hebling J.; de Souza Costa C.A.                                                                                  | Influence of enamel/dentin thickness on the toxic and esthetic effects of experimental in-office bleaching protocols                                                    | 2017 | Clinical Oral Investigations                                                                            |
| De Miranda J.L.C.; Santana C.M.M.; Santana R.B.                                                                                                                   | Influence of endodontic treatment in the post-surgical healing of human class ii furcation defects                                                                      | 2013 | Journal of Periodontology                                                                               |
| Brandão P.M., de Figueiredo J.A.P., Morgental R.D., Scarpato R.K., Hartmann R.C., Waltrick S.B.G., Souza R.A.                                                     | Influence of foraminal enlargement on the healing of periapical lesions in rat molars                                                                                   | 2019 | Clinical oral investigations                                                                            |
| Simonović D.D.; Janković L.V.; Dačić S.; Petrović A.R.; Veličković S.; Petrović A.; Rakonjac M.                                                                   | Influence of inflammation to lymphangiogenesis in human dental pulp; Uticaj zapaljenja na limfangiogenezu u zubnoj pulpi ljudi                                          | 2013 | Acta Facultatis Medicae Naissensis                                                                      |
| Bago I., Sandrić A., Beljic-Ivanovic K., Pažin B.                                                                                                                 | Influence of irrigation and laser assisted root canal disinfection protocols on dislocation resistance of a bioceramic sealer                                           | 2022 | Photodiagnosis and Photodynamic Therapy                                                                 |
| Prada I.; Micó-Muñoz P.; Giner-Lluesma T.; Micó-Martínez P.; Collado-Castellano N.; Manzano-Saiz A.                                                               | Influence of microbiology on endodontic failure. Literature review                                                                                                      | 2019 | Medicina Oral Patología Oral y Cirugía Bucal                                                            |
| R R, Aravind A, Kumar V, Sharma S, Chawla A, Logani A.                                                                                                            | Influence of occlusal and proximal caries on the outcome of full pulpotomy in permanent mandibular molar teeth with partial irreversible pulpitis: A prospective study  | 2021 | Int Endod J                                                                                             |
| Fontana C.E., da Silveira Bueno C.E., de Moura J.D.M., da Rocha Bastida Pinheiro G., Trevensoli V.C., Pelegrine R.A., Rocha D.G.P., De Martin A.S., Pinheiro S.L. | Influence of operator experience on apical debris extrusion after endodontic instrumentation with different single-file systems                                         | 2022 | Giornale Italiano di Endodonzia                                                                         |
| Mese M, Tok YT, Kaya S, Akcay M.                                                                                                                                  | Influence of ozone application in the stepwise excavation of primary molars: a randomized clinical trial                                                                | 2020 | Clin Oral Investig                                                                                      |
| Abdelgawad L.M.; Nghnughi M.H.; Abdelgwad M.                                                                                                                      | Influence of photo biomodulation using 980 nm diode laser and exosomes derived from dental pulp stem cells on pulp regeneration of dogs' teeth                          | 2022 | Journal of Medical Pharmaceutical and Allied Sciences                                                   |
| Banci H.A.; Strazzi-Sahyon H.B.; Duarte M.A.H.; Cintra L.T.A.; Gomes-Filho J.E.; Chalub L.O.; Berton S.A.; de Oliveira V.H.D.; dos Santos P.H.; Sivieri-Araujo G. | Influence of photodynamic therapy on bond strength and adhesive interface morphology of MTA based root canal sealer to different thirds of intraradicular dentin        | 2020 | Photodiagnosis and Photodynamic Therapy                                                                 |
| Santos J.M.; Marques J.A.; Diogo P.; Messias A.; Sousa V.; Sequeira D.; Palma P.J.                                                                                | Influence of Preoperative Pulp Inflammation in the Outcome of Full Pulpotomy Using a Dog Model                                                                          | 2021 | Journal of Endodontics                                                                                  |
| Ilgenstein I., Zitzmann N.U., Bühler J., Wegehaupt F.J., Attin T., Weiger R., Krastl G.                                                                           | Influence of proximal box elevation on the marginal quality and fracture behavior of root-filled molars restored with CAD/CAM ceramic or composite onlays               | 2015 | Clinical oral investigations                                                                            |
| Angerame D.; De Biasi M.; Marigo L.; Castagnola R.; Somma F.; Castaldo A.                                                                                         | Influence of simulated apical resorption following orthodontic treatment on working length determination: an in vitro study.                                            | 2014 | European journal of paediatric dentistry : official journal of European Academy of Paediatric Dentistry |
| Rosado LPL, Fagundes FB, Freitas DQ, Oliveira ML, Neves FS.                                                                                                       | Influence of the Intracanal Material and Metal Artifact Reduction Tool in the Detection of the Second Mesio Buccal Canal in Cone-beam Computed Tomographic Examinations | 2020 | J Endod                                                                                                 |
| Kovach I.; Buniatian K.; Makarevych A.; Verbyts'ka A.; Gargin V.                                                                                                  | INFLUENCE OF TRICALCIUM SILICATE ON COURSE OF TRAUMATIC PULPITIS                                                                                                        | 2018 | Georgian medical news                                                                                   |
| Gao B.; Chen W.; Hao L.; Zhu G.; Feng S.; Ci H.; Zhou X.; Stashenko P.; Li Y.P.                                                                                   | Inhibiting periapical lesions through AAV-RNAi silencing of cathepsin K                                                                                                 | 2013 | Journal of Dental Research                                                                              |
| Lv G.; Zhu G.; Xu M.; Gao X.; Xiao Q.                                                                                                                             | Inhibition of carrageenan-induced dental inflammatory responses owing to decreased TRPV1 activity by Dexmedetomidine                                                    | 2020 | Journal of Inflammation (United Kingdom)                                                                |

|                                                                                                                                    |                                                                                                                                                                                                                                                              |      |                                                                   |
|------------------------------------------------------------------------------------------------------------------------------------|--------------------------------------------------------------------------------------------------------------------------------------------------------------------------------------------------------------------------------------------------------------|------|-------------------------------------------------------------------|
| Kim J.M.; Kang S.W.; Shin S.-M.; Kim D.S.; Choi K.-K.; Kim E.-C.; Kim S.-Y.                                                        | Inhibition of matrix metalloproteinases expression in human dental pulp cells by all-trans retinoic acid                                                                                                                                                     | 2014 | International Journal of Oral Science                             |
| Luo H.; Wang C.; Liu M.; Yin B.; A P.; Huang D.; Ye L.                                                                             | Inhibition of SOX9 Promotes Inflammatory and Immune Responses of Dental Pulp                                                                                                                                                                                 | 2018 | Journal of Endodontics                                            |
| Wang Y.; Yuan S.; Sun J.; Gong Y.; Liu S.; Guo R.; He W.; Kang P.; Li R.                                                           | Inhibitory effect of the TSG-6 on the BMP-4/Smad signaling pathway and odonto/osteogenic differentiation of dental pulp stem cells                                                                                                                           | 2020 | Biomedicine and Pharmacotherapy                                   |
| Hu L.; Shen H.; Guo S.                                                                                                             | Inhibitory Effects of Resveratrol on Inflammatory Response in Rat Dental Pulp                                                                                                                                                                                | 2022 | Journal of Hard Tissue Biology                                    |
| Lopes C.S.; Junqueira M.A.; Cosme-Silva L.; Pegoraro C.O.R.; Garbelini C.C.D.; Oliveira T.M.; Martins N.S.; Neves J.S.; Sakai V.T. | Initial inflammatory response after the pulpotomy of rat molars with mta or ferric sulfate                                                                                                                                                                   | 2019 | Journal of Applied Oral Science                                   |
| Takei E.; Shigetani Y.; Yoshida K.; Hinata G.; Yoshida N.; Okiji T.                                                                | Initial transient accumulation of M2 macrophage-associated molecule-expressing cells after pulpotomy with mineral trioxide aggregate in rat molars                                                                                                           | 2014 | Journal of Endodontics                                            |
| Silva C.R.; Babo P.S.; Gulino M.; Costa L.; Oliveira J.M.; Silva-Correia J.; Domingues R.M.A.; Reis R.L.; Gomes M.E.               | Injectable and tunable hyaluronic acid hydrogels releasing chemotactic and angiogenic growth factors for endodontic regeneration                                                                                                                             | 2018 | Acta Biomaterialia                                                |
| Pankajakshan D.; Voytik-Harbin S.L.; Nör J.E.; Bottino M.C.                                                                        | Injectable Highly Tunable Oligomeric Collagen Matrices for Dental Tissue Regeneration                                                                                                                                                                        | 2020 | ACS Applied Bio Materials                                         |
| De Almeida Paschoalino M.; Hanan A.A.; Marques A.A.F.; Da Fonseca Roberti Garcia L.; Garrido A.B.; Sponchiado Jr. E.C.             | Injection of sodium hypochlorite beyond the apical foramen- A case report                                                                                                                                                                                    | 2012 | General Dentistry                                                 |
| Zanolli C, Pan L, Dumoncel J, Kullmer O, Kundrát M, Liu W, Macchiarelli R, Mancini L, Schrenk F, Tuniz C.                          | Inner tooth morphology of Homo erectus from Zhoukoudian. New evidence from an old collection housed at Uppsala University, Sweden                                                                                                                            | 2018 | J Hum Evol                                                        |
| Aravinda V.S.S., Madhavi Krishna M., Nikitha B.S., Malathi Y., Jayanth C.H.                                                        | Innovative clinical technique of space maintenance using customised functional space maintainer: A case series                                                                                                                                               | 2021 | Journal of Clinical and Diagnostic Research                       |
| Amato A., Caggiano M., Pantaleo G., Amato M.                                                                                       | In-office and walking bleach dental treatments on endodontically-treated teeth: 25 years follow-up                                                                                                                                                           | 2018 | Minerva Stomatologica                                             |
| da SILVA-COSTA R.S.G.; Ribeiro A.E.L.; de ASSUNÇÃO I.V.; de ARAÚJO JÚNIOR R.F.; de ARAÚJO A.A.; Guerra G.C.B.; Borges B.C.D.       | In-office tooth bleaching with 38% hydrogen peroxide promotes moderate/severe pulp inflammation and production of Il-1 $\beta$ , TNF- $\beta$ , GPX, FGF-2 and osteocalcin in rats                                                                           | 2018 | Journal of Applied Oral Science                                   |
| Yoshida S.; Tomokiyo A.; Hasegawa D.; Hamano S.; Sugii H.; Maeda H.                                                                | Insight into the role of dental pulp stem cells in regenerative therapy                                                                                                                                                                                      | 2020 | Biology                                                           |
| Salama A.A.; Aboul-Ela Y.M.                                                                                                        | INSIGHTS INTO DENTAL TREATMENT UNDER GENERAL ANESTHESIA IN A GROUP OF EGYPTIAN PEDIATRIC PATIENTS                                                                                                                                                            | 2022 | International Journal of Clinical Dentistry                       |
| Tsujino K.; Shintani S.                                                                                                            | Intentional Partial Pulpotomy for Treatment of Immature Permanent Maxillary Incisor with Talon Cusp                                                                                                                                                          | 2017 | The Bulletin of Tokyo Dental College                              |
| Javed M.Q., Zaman H., Srivastava S., Khan Z.J.                                                                                     | Intentional Replantation Of Mandibular First Molar With Two Years Follow Up- Case Report                                                                                                                                                                     | 2022 | Journal of Ayub Medical College, Abbottabad : JAMC                |
| Anand P.; Mathur S.; Sachdev V.; Jain A.                                                                                           | Inter-comparison of antimicrobial photodynamic therapy, LASER, and an antifungal agent as adjunct intracanal irrigation techniques to standard disinfection protocols in reducing Candida albicans counts in the root canals of primary teeth: A pilot study | 2020 | Journal of Indian Society of Pedodontics and Preventive Dentistry |
| Al-Jeaidi Z.                                                                                                                       | Interdisciplinary approach for full mouth rehabilitation: A case report                                                                                                                                                                                      | 2016 | Asian Journal of Pharmaceutical and Clinical Research             |
| Zafar K., Nazeer M.R., Ghafoor R.                                                                                                  | Interdisciplinary management of gingival recession and pathologic teeth migration-Revisiting dental aesthetics                                                                                                                                               | 2019 | JPMA. The Journal of the Pakistan Medical Association             |
| Mathews D.P., Knight D.J., O'Connor R.V., Kokich V.G.                                                                              | Interdisciplinary treatment of a patient with amelogenesis imperfecta: Case report with a 35-year follow-up                                                                                                                                                  | 2021 | Journal of Esthetic and Restorative Dentistry                     |
| Sonoda S.; Yamaza H.; Ma L.; Tanaka Y.; Tomoda E.; Aijima R.; Nonaka K.; Kukita T.; Shi S.; Nishimura F.; Yamaza T.                | Interferon-gamma improves impaired dentinogenic and immunosuppressive functions of irreversible pulpitis-derived human dental pulp stem cells                                                                                                                | 2016 | Scientific Reports                                                |

|                                                                                                                                                                                      |                                                                                                                                                                                                                     |      |                                                                   |
|--------------------------------------------------------------------------------------------------------------------------------------------------------------------------------------|---------------------------------------------------------------------------------------------------------------------------------------------------------------------------------------------------------------------|------|-------------------------------------------------------------------|
| Šubarić L.; Mitić A.; Matvijenko V.; Jovanović R.; Živković D.; Perić D.; Vlahović Z.                                                                                                | Interleukin 1-beta analysis in chronically inflamed and healthy human dental pulp; Analiza interleukina 1-beta u hronično zapaljenoj i zdravoj zubnoj pulpi                                                         | 2017 | Vojnosanitetski Pregled                                           |
| Liu M.; Zhao Y.; Wang C.; Luo H.; A P.; Ye L.                                                                                                                                        | Interleukin-17 plays a role in pulp inflammation partly by WNT5A protein induction                                                                                                                                  | 2019 | Archives of Oral Biology                                          |
| Nibali L.; Fedele S.; D'Aiuto F.; Donos N.                                                                                                                                           | Interleukin-6 in oral diseases: A review                                                                                                                                                                            | 2012 | Oral Diseases                                                     |
| Tomaszewska I.M., Skinningsrud B., Jarzębska A., Pękala J.R., Tarasiuk J., Iwanaga J.                                                                                                | Internal and external morphology of mandibular molars: An original micro-CT study and meta-analysis with review of implications for endodontic therapy                                                              | 2018 | Clinical Anatomy                                                  |
| Schwendicke F, Walsh T, Lamont T, Al-Yaseen W, Bjørndal L, Clarkson JE, Fontana M, Gomez Rossi J, Göstemeyer G, Levey C, Müller A, Ricketts D, Robertson M, Santamaria RM, Innes NP. | Interventions for treating cavitated or dentine carious lesions                                                                                                                                                     | 2021 | Cochrane Database Syst Rev                                        |
| Correa Maldonado D.; Nicoliche T.; Faber J.; Kerkis I.; Saez D.M.; Sasaki R.T.; Da Silva M.C.P.                                                                                      | Intra-articular human deciduous dental pulp stem cell administration vs. pharmacological therapy in experimental osteoarthritis rat model                                                                           | 2021 | European Review for Medical and Pharmacological Sciences          |
| Patro P.P.                                                                                                                                                                           | Intracanal medicaments in paediatric endodontics                                                                                                                                                                    | 2020 | Indian Journal of Forensic Medicine and Toxicology                |
| Costa Y.M.; de Souza P.R.J.; Marques V.A.S.; Conti P.C.R.; Vivan R.R.; Duarte M.A.H.; Bonjardim L.R.                                                                                 | Intraoral Somatosensory Alterations Impact Pulp Sensibility Testing in Patients with Symptomatic Irreversible Pulpitis                                                                                              | 2020 | Journal of Endodontics                                            |
| Sixou J.-L.; Marie-Cousin A.                                                                                                                                                         | Intraosseous anaesthesia in children with 4 % articaine and epinephrine 1:400,000 using computer-assisted systems                                                                                                   | 2015 | European Archives of Paediatric Dentistry                         |
| Pourrahimi A.M.; Abbasnejad M.; Esmaili-Mahani S.; Kooshki R.; Raoof M.                                                                                                              | Intra-periaqueductal gray matter administration of orexin-A exaggerates pulpitis-induced anxiogenic responses and c-fos expression mainly through the interaction with orexin 1 and cannabinoid 1 receptors in rats | 2019 | Neuropeptides                                                     |
| Haeussler S, Luepke M, Seifert H, Staszky C.                                                                                                                                         | Intra-pulp temperature increase of equine cheek teeth during treatment with motorized grinding systems: influence of grinding head position and rotational speed                                                    | 2014 | BMC Vet Res                                                       |
| Bhatti U.A., Javed M.Q., Al Attas M.H.                                                                                                                                               | Intra-radicular reinforcement using a modified fiber post customization technique: A case report                                                                                                                    | 2021 | Pan African Medical Journal                                       |
| Espona J., Roig E., Durán-Sindreu F., Abella F., Machado M., Roig M.                                                                                                                 | Invasive Cervical Resorption: Clinical Management in the Anterior Zone                                                                                                                                              | 2018 | Journal of endodontics                                            |
| Singh J.; O'Donnell K.; Nieves D.J.; Adler-Shohet F.C.; Arrieta A.C.; Ashouri N.; Ahuja G.; Cheung M.; Holmes W.N.; Huoh K.; Tran L.; Tran M.T.; Pham N.; Zahn M.                    | Invasive mycobacterium abscessus outbreak at a pediatric dental clinic                                                                                                                                              | 2021 | Open Forum Infectious Diseases                                    |
| Gemmell A.; Stone S.; Edwards D.                                                                                                                                                     | Investigating acute management of irreversible pulpitis: a survey of general dental practitioners in North East England                                                                                             | 2020 | British Dental Journal                                            |
| Nguyen H.-Q.-D.; Kao C.-Y.; Chiang C.-P.; Hung Y.-H.; Lo C.-M.                                                                                                                       | Investigating the Immunomodulatory Potential of Dental Pulp Stem Cell Cultured on Decellularized Bladder Hydrogel towards Macrophage Response In Vitro                                                              | 2022 | Gels                                                              |
| Cai M.; Ratnayake J.; Cathro P.; Gould M.; Ali A.                                                                                                                                    | Investigation of a Novel Injectable Chitosan Oligosaccharide—Bovine Hydroxyapatite Hybrid Dental Biocomposite for the Purposes of Conservative Pulp Therapy                                                         | 2022 | Nanomaterials                                                     |
| Ustiaşvili M.; Kordzaia D.; Mamaladze M.; Jangavadze M.; Sanodze L.                                                                                                                  | Investigation of functional activity human dental pulp stem cells at acute and chronic pulpitis                                                                                                                     | 2014 | Georgian medical news                                             |
| Arruda-Vasconcelos R.; Louzada L.M.; Feres M.; Tomson P.L.; Cooper P.R.; Gomes B.P.F.A.                                                                                              | Investigation of microbial profile, levels of endotoxin and lipoteichoic acid in teeth with symptomatic irreversible pulpitis: a clinical study                                                                     | 2021 | International Endodontic Journal                                  |
| Chiu C.-C.; Chang Y.-C.; Huang R.-Y.; Chan J.-S.; Chung C.-H.; Chien W.-C.; Kao Y.-H.; Hsiao P.-J.                                                                                   | Investigation of the impact of endodontic therapy on survival among dialysis patients in taiwan: A nationwide population-based cohort study                                                                         | 2021 | International Journal of Environmental Research and Public Health |
| Fahmy S.H.; Hassanien E.E.S.; Nagy M.M.; El Batouty K.M.; Mekhemar M.; Fawzy El Sayed K.; Hassanein E.H.; Wiltfang J.; Dörfer C.                                                     | Investigation of the regenerative potential of necrotic mature teeth following different revascularisation protocols                                                                                                | 2017 | Australian Endodontic Journal                                     |
| Hamdan R., Michetti J., Dionnet C., Diemer F., Georgelin-Gurgel M.                                                                                                                   | In-vitro evaluation of apical microleakage of two obturation methods of immature permanent teeth: orthograde apical                                                                                                 | 2017 | Giornale Italiano di Endodonzia                                   |

|                                                                                                                    |                                                                                                                                                                                                                                                                                                              |      |                                             |
|--------------------------------------------------------------------------------------------------------------------|--------------------------------------------------------------------------------------------------------------------------------------------------------------------------------------------------------------------------------------------------------------------------------------------------------------|------|---------------------------------------------|
|                                                                                                                    | plug of Mineral Trioxide Aggregate and root canal filling combining custom gutta-percha cone with Calcium Silicate-based sealer                                                                                                                                                                              |      |                                             |
| van Duinen RN, Shahid S, Hill R, Glavina D.                                                                        | In-vitro Study on Temperature Changes in the Pulp Chamber Due to Thermo-Cure Glass Ionomer Cements                                                                                                                                                                                                           | 2016 | Acta Stomatol Croat                         |
| Watase T, Shimizu K, Komiya H, Ohara K, Iwata K, Ogiso B.                                                          | Involvement of transient receptor potential vanilloid 1 channel expression in orofacial cutaneous hypersensitivity following tooth pulp inflammation                                                                                                                                                         | 2018 | J Oral Sci                                  |
| Cassol D.V., Duarte M.L., Pintor A.V.B., Barcelos R., Primo L.G.                                                   | Iodoform Vs Calcium Hydroxide/Zinc Oxide based pastes: 12-month findings of a Randomized Controlled Trial                                                                                                                                                                                                    | 2019 | Brazilian oral research                     |
| Kunarti S.; Nuraini N.; Astuti F.W.; Lunardi C.G.J.; Putri L.R.                                                    | Irradiation Time of Photodynamic Therapy to the Number of Lactobacillus acidophilus                                                                                                                                                                                                                          | 2021 | Archives of Orofacial Sciences              |
| Agnihotry A.; Gill K.S.; Stevenson R.G., III; Fedorowicz Z.; Kumar V.; Sprakel J.; Cohen S.; Thompson W.           | Irreversible pulpitis – A source of antibiotic over-prescription?                                                                                                                                                                                                                                            | 2019 | Brazilian Dental Journal                    |
| Koch J.D.; Jaramillo D.E.; DiVito E.; Peters O.A.                                                                  | Irrigant flow during photon-induced photoacoustic streaming (PIPS) using Particle Image Velocimetry (PIV)                                                                                                                                                                                                    | 2016 | Clinical Oral Investigations                |
| Chen JE, Nurbakhsh B, Layton G, Busmann M, Kishen A.                                                               | Irrigation dynamics associated with positive pressure, apical negative pressure and passive ultrasonic irrigations: a computational fluid dynamics analysis                                                                                                                                                  | 2014 | Aust Endod J                                |
| da Rosa W.L.O., Lima V.P., Moraes R.R., Piva E., da Silva A.F.                                                     | Is a calcium hydroxide liner necessary in the treatment of deep caries lesions? A systematic review and meta-analysis                                                                                                                                                                                        | 2019 | International endodontic journal            |
| Fowler S.; Reader A.                                                                                               | Is a volume of 3.6 ml better than 1.8 ml for inferior alveolar nerve blocks in patients with symptomatic irreversible pulpitis?                                                                                                                                                                              | 2013 | Journal of Endodontics                      |
| İnci M.A., Korkut E.                                                                                               | Is Bioactive Glass an Effective Agent in Pulp-capping Treatments?: A Randomized Controlled Clinical Trial with One-year Follow-up                                                                                                                                                                            | 2022 | The journal of contemporary dental practice |
| Ganss C.                                                                                                           | Is erosive tooth wear an oral disease?                                                                                                                                                                                                                                                                       | 2014 | Monographs in Oral Science                  |
| Ricucci D., Loghin S., Lin L.M., Spångberg L.S., Tay F.R.                                                          | Is hard tissue formation in the dental pulp after the death of the primary odontoblasts a regenerative or a reparative process?                                                                                                                                                                              | 2014 | Journal of dentistry                        |
| Assis S, Casimiro S, Alves Cardoso F.                                                                              | Is it a cystic or a cyst-like condition? Discussing the etiology of an unusual large mandibular lesion in a Roman skeleton from Quinta da Torrinha/Quinta de Santo António (Almada, Portugal)                                                                                                                | 2018 | Int J Paleopathol                           |
| George R.                                                                                                          | Is partial pulpotomy in cariously exposed posterior permanent teeth a viable treatment option?                                                                                                                                                                                                               | 2020 | Evid Based Dent                             |
| Bjørndal L.                                                                                                        | Is pulpotomy preferable to root treatment where there is pulp exposure?                                                                                                                                                                                                                                      | 2019 | Evidence-Based Dentistry                    |
| Malekfar A.; Valli K.S.; Kanafi M.M.; Bhonde R.R.                                                                  | Isolation and Characterization of Human Dental Pulp Stem Cells from Cryopreserved Pulp Tissues Obtained from Teeth with Irreversible Pulpitis                                                                                                                                                                | 2016 | Journal of Endodontics                      |
| Weiss J.B.; Gonçalves F.D.S.; Maranduba C.M.D.C.; de RESENDE L.M.; Do Carmo A.M.R.                                 | Isolation and characterization of stem cells derived by human dental pulp from harvest based in rotary and manual techniques used in endodontic therapy; Isolamento e caracterização de células tronco da polpa dentária humana obtidas em instrumentação mecanizada e manual durante tratamento endodôntico | 2020 | Brazilian Dental Science                    |
| Horibe H.; Murakami M.; Iohara K.; Hayashi Y.; Takeuchi N.; Takei Y.; Kurita K.; Nakashima M.                      | Isolation of a stable subpopulation of Mobilized Dental Pulp Stem Cells (MDPSCs) with high proliferation, migration, and regeneration potential is independent of age                                                                                                                                        | 2014 | PLoS ONE                                    |
| Tsai A.I.; Hong H.-H.; Lin W.-R.; Fu J.-F.; Chang C.-C.; Wang I.-K.; Huang W.-H.; Weng C.-H.; Hsu C.-W.; Yen T.-H. | Isolation of Mesenchymal Stem Cells from Human Deciduous Teeth Pulp                                                                                                                                                                                                                                          | 2017 | BioMed Research International               |
| Zhang K.; Yang W.                                                                                                  | Iterative Noise Reduction Algorithm-Based Cone Beam Computed Tomography Image Analysis for Dental Pulp Disease in Root Canal Therapies                                                                                                                                                                       | 2022 | Scientific Programming                      |
| Santhosh B.P.; Jethmalani P.                                                                                       | Johanson-Blizzard syndrome: Dental findings and management                                                                                                                                                                                                                                                   | 2013 | Journal of Contemporary Dental Practice     |
| Hayama T.; Kamio N.; Okabe T.; Muromachi K.; Matsushima K.                                                         | Kallikrein Promotes Inflammation in Human Dental Pulp Cells Via Protease-Activated Receptor-1                                                                                                                                                                                                                | 2016 | Journal of Cellular Biochemistry            |
| Jeevanandan G.                                                                                                     | Kedo-S paediatric rotary files for root canal preparation in primary teeth - Case report                                                                                                                                                                                                                     | 2017 | Journal of Clinical and Diagnostic Research |

|                                                                                                                                                                                                                                        |                                                                                                                                                                                                 |      |                                                              |
|----------------------------------------------------------------------------------------------------------------------------------------------------------------------------------------------------------------------------------------|-------------------------------------------------------------------------------------------------------------------------------------------------------------------------------------------------|------|--------------------------------------------------------------|
| Choi E.-K.; Kim S.-H.; Kang I.-C.; Jeong J.-Y.; Koh J.-T.; Lee B.-N.; Oh W.-M.; Min K.-S.; Nör J.E.; Hwang Y.-C.                                                                                                                       | Ketoprofen inhibits expression of inflammatory mediators in human dental pulp cells                                                                                                             | 2013 | Journal of Endodontics                                       |
| Pelagalli P.; Gatto R.; Moscatti M.                                                                                                                                                                                                    | Kids Digital Crown Technique: an innovative approach to restore primary teeth                                                                                                                   | 2021 | European Journal of Paediatric Dentistry                     |
| Sun Z, Wang L, Peng B.                                                                                                                                                                                                                 | Kinetics of glycogen synthase kinase (GSK)3 $\beta$ and phosphorylated GSK3 $\beta$ (Ser 9) expression in experimentally induced periapical lesions                                             | 2014 | Int Endod J                                                  |
| AlJazairy Y.H., Halawany H.S., AlMaflehi N., Alhussainan N.S., Abraham N.B., Jacob V.                                                                                                                                                  | Knowledge about permanent tooth avulsion and its management among dentists in Riyadh, Saudi Arabia                                                                                              | 2015 | BMC oral health                                              |
| Santhosh Kumar M.P., Lavanya                                                                                                                                                                                                           | Knowledge about post extraction complications among undergraduate dental students                                                                                                               | 2016 | Journal of Pharmaceutical Sciences and Research              |
| Acharya S.                                                                                                                                                                                                                             | Knowledge and attitude of general and specialist dentist in pediatric dentistry: A pilot study in Odisha, India                                                                                 | 2019 | Indian Journal of Dental Research                            |
| Karthikeson P.S.; Vignesh R.                                                                                                                                                                                                           | Knowledge and attitude of general dentists and dentists of other specialties toward endodontic treatment of primary teeth                                                                       | 2019 | Drug Invention Today                                         |
| Bharadwaj B.; Jeevanandan G.                                                                                                                                                                                                           | Knowledge and awareness about formocresol used in pulpotomy among dental students                                                                                                               | 2018 | Drug Invention Today                                         |
| Alex A., Balaji Ganesh S., Prathap L.                                                                                                                                                                                                  | Knowledge and awareness of various dental biomaterials used in pediatric patients-a survey                                                                                                      | 2020 | Indian Journal of Forensic Medicine and Toxicology           |
| Mary D.J.; Anjaneyulu K.; Santhosh Kumar M.P.                                                                                                                                                                                          | Knowledge and awareness regarding root canal treatment among the general population                                                                                                             | 2021 | International Journal of Dentistry and Oral Science          |
| Gasqui M.-A., Laforest L., Le Clerc J., Ceinos R., Chemla F., Chevalier V., Colon P., Fioretti F., Gevrey A., Kérourédan O., Maret D., Mocquot C., Ozcan C., Perez F., Terrer E., Turpin Y.-L., Arbab-Chirani R., Doméjean S., Seux D. | Knowledge and Opinions of French Dental Students in Operative Dentistry - Management of Deep Carious Lesions                                                                                    | 2021 | Oral health & preventive dentistry                           |
| Nayak U.A., Wadhwa S., Kashyap N., Prajapati D., Mahuli A.V., Sharma R.                                                                                                                                                                | Knowledge and practice of, and attitudes toward, pulp therapy in deciduous teeth among pediatric dentists in India                                                                              | 2018 | Journal of investigative and clinical dentistry              |
| Sheriff A.H., Ganapathy D., Rohinikumar S.                                                                                                                                                                                             | Knowledge and practice towards management of space infections among dental practitioners                                                                                                        | 2020 | International Journal of Research in Pharmaceutical Sciences |
| Juliet S.; Gurunathan D.                                                                                                                                                                                                               | Knowledge attitude and practice of general dentist towards pediatric dentistry                                                                                                                  | 2018 | Biomedicine (India)                                          |
| Kumaran A.S.K.; Ramesh S.                                                                                                                                                                                                              | KNOWLEDGE AWARENESS AND PERCEPTION OF PAIN MANAGEMENT POSTOPERATIVELY AFTER ROOT CANAL TREATMENT USING HAND AND ROTARY INSTRUMENTATION                                                          | 2022 | Journal of Pharmaceutical Negative Results                   |
| Al-Haj Ali S.N.; Algarawi S.A.; Alrubaian A.M.; Alasqah A.I.                                                                                                                                                                           | Knowledge of General Dental Practitioners and Specialists about Emergency Management of Traumatic Dental Injuries in Qassim, Saudi Arabia                                                       | 2020 | International Journal of Pediatrics (United Kingdom)         |
| Hemmanur S., Nasim I., Sowmya K.                                                                                                                                                                                                       | Knowledge, attitude and practice of endodontic emergencies and their management amongst general dental practitioners and endodontists - A questionnaire based survey                            | 2020 | International Journal of Pharmaceutical Research             |
| Sudarsan R.; Balaji Ganesh S.; Anjaneyulu K.                                                                                                                                                                                           | Knowledge, attitude and practise of usage of mta and bio dentine as direct pulp capping agents-a questionnaire study                                                                            | 2020 | International Journal of Research in Pharmaceutical Sciences |
| Jain A., Mani G.                                                                                                                                                                                                                       | Knowledge, attitude, and practice regarding standardized treatment protocol for pulp therapy in deciduous dentition among general dental practitioners of Chennai, India-A questionnaire survey | 2020 | International Journal of Pharmaceutical Research             |
| Bargale S, Davangere Padmanabh SK, Kariya PB, Shah S, Dave B.                                                                                                                                                                          | Knowledge, attitude, and practice regarding standardized treatment protocol for pulp therapy in deciduous dentition among general dental practitioners of Vadodara, Gujarat, India              | 2019 | J Indian Soc Pedod Prev Dent                                 |
| Keerthika R.; Ranjan M.                                                                                                                                                                                                                | Laser as an antimicrobial photodynamic therapy in endodontics-literature review                                                                                                                 | 2021 | International Journal of Dentistry and Oral Science          |

|                                                                                                                                                                    |                                                                                                                                                                                                       |      |                                     |
|--------------------------------------------------------------------------------------------------------------------------------------------------------------------|-------------------------------------------------------------------------------------------------------------------------------------------------------------------------------------------------------|------|-------------------------------------|
| Lee H.-N.; Yan D.-Y.; Huang C.-Y.; Chen S.-C.; Pan C.-Y.; Jeng J.-H.; Chen Y.-K.; Chuang F.-H.                                                                     | Laser doppler for accurate diagnosis of oehler's type iii dens invaginatus: A case report                                                                                                             | 2021 | Applied Sciences (Switzerland)      |
| Pereira L.O.; Longo J.P.F.; Azevedo R.B.                                                                                                                           | Laser irradiation did not increase the proliferation or the differentiation of stem cells from normal and inflamed dental pulp                                                                        | 2012 | Archives of Oral Biology            |
| Abalos C, Herrera M, Bonilla V, San Martin L, Mendoza A.                                                                                                           | Laser-induced fluorescence in the diagnosis of pulp exposure and the influence of residual dentin thickness: An in vivo study                                                                         | 2015 | Am J Dent                           |
| Pagano S.; Lombardo G.; Orso M.; Abraha L.; Capobianco B.; Cianetti S.                                                                                             | Lasers to prevent dental caries: A systematic review                                                                                                                                                  | 2020 | BMJ Open                            |
| Kataoka S.H.H.; Setzer F.C.; Gondim-Junior E.; Fregnani E.R.; Moraes C.J.P.; Pessoa O.F.; Gavini G.; Caldeira C.L.                                                 | Late Effects of Head and Neck Radiotherapy on Pulp Vitality Assessed by Pulse Oximetry                                                                                                                | 2016 | Journal of Endodontics              |
| Sukkul P.; Kasemsap N.                                                                                                                                             | Lemierre's syndrome with cavernous sinus thrombosis caused by dental infection                                                                                                                        | 2021 | BMJ Case Reports                    |
| Martín-González J.; Sánchez-Jiménez F.; Pérez-Pérez A.; Carmona-Fernández A.; Sánchez-Margalet V.; Segura-Egea J.J.                                                | Leptin expression in healthy and inflamed human dental pulp                                                                                                                                           | 2013 | International Endodontic Journal    |
| Ngo V.A.; Jung J.-Y.; Koh J.-T.; Oh W.-M.; Hwang Y.-C.; Lee B.-N.                                                                                                  | Leptin Induces Odontogenic Differentiation and Angiogenesis in Human Dental Pulp Cells via Activation of the Mitogen-activated Protein Kinase Signaling Pathway                                       | 2018 | Journal of Endodontics              |
| Martín-González J.; Pérez-Pérez A.; Sánchez-Jiménez F.; Carmona-Fernández A.; Torres-Lagares D.; Sánchez-Margalet V.; Segura-Egea J.J.                             | Leptin receptor is up-regulated in inflamed human dental pulp                                                                                                                                         | 2013 | Journal of Endodontics              |
| Martín-González J.; Pérez-Pérez A.; Cabanillas-Balsera D.; Vilariño-García T.; Sánchez-Margalet V.; Segura-Egea J.J.                                               | Leptin stimulates DMP-1 and DSPP expression in human dental pulp via MAPK 1/3 and PI3K signaling pathways                                                                                             | 2019 | Archives of Oral Biology            |
| San Diego JP, Newton T, Quinn BF, Cox MJ, Woolford MJ.                                                                                                             | Levels of agreement between student and staff assessments of clinical skills in performing cavity preparation in artificial teeth                                                                     | 2014 | Eur J Dent Educ                     |
| Aguirre-López E.C.; Patiño-Marín N.; Martínez-Castañón G.A.; Medina-Solís C.E.; Castillo-Silva B.E.; Cepeda-Argüelles O.; Aguilera-Galaviz L.A.; Rosales-García P. | Levels of matrix metalloproteinase-8 and cold test in reversible and irreversible pulpitis                                                                                                            | 2020 | Medicine (United States)            |
| Zhang J.; Si J.; Liang R.; Lu Y.; Shang H.; Li X.; Sun S.; Wu L.-A.                                                                                                | Ligand-gated ion channel P2X7 regulates hypoxia-induced factor-1 $\alpha$ mediated pain induced by dental pulpitis in the medullary dorsal horn                                                       | 2022 | Frontiers in Molecular Neuroscience |
| García-Mota LF, Hardan L, Bourgi R, Zamarripa-Calderón JE, Rivera-Gonzaga JA, Hernández-Cabanillas JC, Cuevas-Suárez CE.                                           | LIGHT-CURED CALCIUM SILICATE BASED-CEMENTS AS PULP THERAPEUTIC AGENTS: A META-ANALYSIS OF CLINICAL STUDIES                                                                                            | 2022 | J Evid Based Dent Pract             |
| Fontana M.                                                                                                                                                         | Limited evidence for main reason for failure of partially excavated and restored teeth                                                                                                                | 2014 | Evid Based Dent                     |
| Liu Y.; Dong N.; Miao J.; Li C.; Wang X.; Ruan J.                                                                                                                  | Lin28 promotes dental pulp cell proliferation via upregulation of cyclin-dependent proteins and interaction with let-7a/IGF2BP2 pathways                                                              | 2019 | Biomedicine and Pharmacotherapy     |
| Huang Y.; Jiang H.; Gong Q.; Li X.; Ling J.                                                                                                                        | Lipopolysaccharide stimulation improves the odontoblastic differentiation of human dental pulp cells                                                                                                  | 2015 | Molecular Medicine Reports          |
| Carrouel F.; Staquet M.-J.; Keller J.-F.; Baudouin C.; Msika P.; Bleicher F.; Alliot-Licht B.; Farges J.-C.                                                        | Lipopolysaccharide-binding protein inhibits toll-like receptor 2 activation by lipoteichoic acid in human odontoblast-like cells                                                                      | 2013 | Journal of Endodontics              |
| Qiao W.; Huang Y.; Bian Z.; Sun X.; Wang X.; Gao Q.; Peng Y.; Meng L.                                                                                              | Lipopolysaccharide-induced DNA damage response activates nuclear factor $\kappa$ B signalling pathway via GATA4 in dental pulp cells                                                                  | 2019 | International Endodontic Journal    |
| Ali M.; Okamoto M.; Komichi S.; Watanabe M.; Huang H.; Takahashi Y.; Hayashi M.                                                                                    | Lithium-containing surface pre-reacted glass fillers enhance hDPSC functions and induce reparative dentin formation in a rat pulp capping model through activation of Wnt/ $\beta$ -catenin signaling | 2019 | Acta Biomaterialia                  |
| Parhizkar A, Asgary S.                                                                                                                                             | Local Drug Delivery Systems for Vital Pulp Therapy: A New Hope                                                                                                                                        | 2021 | Int J Biomater                      |

|                                                                                                                                                                     |                                                                                                                                                                                                                                                        |      |                                                                 |
|---------------------------------------------------------------------------------------------------------------------------------------------------------------------|--------------------------------------------------------------------------------------------------------------------------------------------------------------------------------------------------------------------------------------------------------|------|-----------------------------------------------------------------|
| Zhuk R, Taylor S, Johnson JD, Paranjpe A.                                                                                                                           | Locating the MB2 canal in relation to MB1 in Maxillary First Molars using CBCT imaging                                                                                                                                                                 | 2020 | Aust Endod J                                                    |
| Krapež J, Fidler A.                                                                                                                                                 | Location and dimensions of access cavity in permanent incisors, canines, and premolars                                                                                                                                                                 | 2013 | J Conserv Dent                                                  |
| Sun S.Yu., Wang H.                                                                                                                                                  | Location, incidence and clinical implications of the root canal isthmus                                                                                                                                                                                | 2021 | Journal of Prevention and Treatment for Stomatological Diseases |
| Danagouliau S., Wilk T.A.                                                                                                                                           | Locking out prevention: Dental care in the midst of a pandemic                                                                                                                                                                                         | 2022 | Health Economics (United Kingdom)                               |
| Liu M.; Chen L.; Wu J.; Lin Z.; Huang S.                                                                                                                            | Long noncoding RNA MEG3 expressed in human dental pulp regulates LPS-Induced inflammation and odontogenic differentiation in pulpitis                                                                                                                  | 2021 | Experimental Cell Research                                      |
| Xia L.; Wang J.; Qi Y.; Fei Y.; Wang D.                                                                                                                             | Long Non-coding RNA PVT1 is Involved in the Pathological Mechanism of Pulpitis by Regulating miR-128-3p                                                                                                                                                | 2022 | Oral Health and Preventive Dentistry                            |
| Casagrande L, Seminario AT, Correa MB, Werle SB, Maltz M, Demarco FF, Araujo FB.                                                                                    | Longevity and associated risk factors in adhesive restorations of young permanent teeth after complete and selective caries removal: a retrospective study                                                                                             | 2017 | Clin Oral Investig                                              |
| Chaipattanawan N, Chompu-Inwai P, Nirunsittirat A, Phinyo P, Manmontri C.                                                                                           | Longevity of stainless steel crowns as interim restorations on young permanent first molars that have undergone vital pulp therapy treatment in children and factors associated with their treatment failure: A retrospective study of up to 8.5 years | 2022 | Int J Paediatr Dent                                             |
| Rawson T.H., Rayes S., Strizich G., Salazar C.R.                                                                                                                    | Longitudinal Study Comparing Pulpotomy and Pulpotomy Treatments for Primary Molars of Alaska Native Children                                                                                                                                           | 2019 | Pediatric dentistry                                             |
| Morita A.; Takahashi H.; Ozawa K.; Imafuku S.; Takekuni N.; Takahashi K.; Matsuyama T.; Okubo Y.; Zhao Y.; Kitamura S.; Takei K.; Yokoyama M.; Hayashi N.; Terui T. | Long-term analysis of adalimumab in Japanese patients with moderate to severe hidradenitis suppurativa: Open-label phase 3 results                                                                                                                     | 2021 | Journal of Dermatology                                          |
| Chaniotis A.; Chanioti A.                                                                                                                                           | Long-term Complications of Previously Successful Regenerative Endodontic Procedures after Orthodontic Movement: A Report of 3 Different Complications after 4, 8, and 11 Years                                                                         | 2022 | Journal of Endodontics                                          |
| Schwendicke F.; Basso M.; Markovic D.; Turkun L.S.; Miletić I.                                                                                                      | Long-term cost-effectiveness of glass hybrid versus composite in permanent molars                                                                                                                                                                      | 2021 | Journal of Dentistry                                            |
| Meng H.; Wei F.; Ge Z.; Jin J.; Wang H.; Wang L.-S.; Wu C.-T.                                                                                                       | Long-term hypoxia inhibits the passage-dependent stemness decrease and senescence increase of human dental pulp stem cells                                                                                                                             | 2022 | Tissue and Cell                                                 |
| Tan S.Y., Yu V.S.H., Lim K.C., Tan B.C.K., Neo C.L.J., Shen L., Messer H.H.                                                                                         | Long-term Pulpal and Restorative Outcomes of Pulpotomy in Mature Permanent Teeth                                                                                                                                                                       | 2020 | Journal of endodontics                                          |
| Hoefler V, Nagaoka H, Miller CS.                                                                                                                                    | Long-term survival and vitality outcomes of permanent teeth following deep caries treatment with step-wise and partial-caries-removal: A Systematic Review                                                                                             | 2016 | J Dent                                                          |
| Yuan H.; Suzuki S.; Terui H.; Hirata-Tsuchiya S.; Nemoto E.; Yamasaki K.; Saito M.; Shiba H.; Aiba S.; Yamada S.                                                    | Loss of IkB $\zeta$ Drives Dentin Formation via Altered H3K4me3 Status                                                                                                                                                                                 | 2022 | Journal of Dental Research                                      |
| Zhong T.-Y.; Zhang Z.-C.; Gao Y.-N.; Lu Z.; Qiao H.; Zhou H.; Liu Y.                                                                                                | Loss of Wnt4 expression inhibits the odontogenic potential of dental pulp stem cells through JNK signaling in pulpitis                                                                                                                                 | 2019 | American Journal of Translational Research                      |
| Gränicher K.A.; Karygianni L.; Attin T.; Thurnheer T.                                                                                                               | Low Concentrations of Chlorhexidine Inhibit the Formation and Structural Integrity of Enzyme-Treated Multispecies Oral Biofilms                                                                                                                        | 2021 | Frontiers in Microbiology                                       |
| Marques N.C.T.; Neto N.L.; Rodini C.O.; Fernandes A.P.; Sakai V.T.; Machado M.A.A.M.; Oliveira T.M.                                                                 | Low-level laser therapy as an alternative for pulpotomy in human primary teeth                                                                                                                                                                         | 2015 | Lasers in Medical Science                                       |
| Huang Y.; Li X.; Liu Y.; Gong Q.; Tian J.; Jiang H.                                                                                                                 | LPS-induced autophagy in human dental pulp cells is associated with p38                                                                                                                                                                                | 2021 | Journal of Molecular Histology                                  |
| Chen Y.; Zhang L.; Yang J.; Zhang L.; Chen Z.                                                                                                                       | LPS-induced dental pulp inflammation increases expression of ionotropic purinergic receptors in rat trigeminal ganglion                                                                                                                                | 2014 | NeuroReport                                                     |
| Moura J.; Lima M.; Nogueira N.; Castro M.; Lima C.; Moura M.; Moura L.                                                                                              | LSTR Antibiotic Paste Versus Zinc Oxide and Eugenol Pulpotomy for the Treatment of Primary Molars with Pulp Necrosis: A Randomized Controlled Trial                                                                                                    | 2021 | Pediatric dentistry                                             |
| Pan H.; Cheng L.; Yang H.; Zou W.; Cheng R.; Hu T.                                                                                                                  | Lysophosphatidic acid rescues human dental pulp cells from ischemia-induced apoptosis                                                                                                                                                                  | 2014 | Journal of Endodontics                                          |

|                                                                                                                           |                                                                                                                                                                 |      |                                                                                                |
|---------------------------------------------------------------------------------------------------------------------------|-----------------------------------------------------------------------------------------------------------------------------------------------------------------|------|------------------------------------------------------------------------------------------------|
| Watanabe T.; Kamio N.; Okabe T.; Hayama T.; Fukai J.; Watanabe A.; Okada H.; Matsushima K.                                | Macrophage migration inhibitory factor promotes inflammation in human dental pulp                                                                               | 2020 | Journal of Hard Tissue Biology                                                                 |
| Gerlach K.; Ludewig E.; Brehm W.; Gerhards H.; Delling U.                                                                 | Magnetic resonance imaging of pulp in normal and diseased equine cheek teeth                                                                                    | 2013 | Veterinary Radiology and Ultrasound                                                            |
| Emara R, Krois J, Schwendicke F.                                                                                          | Maintaining pulpal vitality: Cost-effectiveness analysis on carious tissue removal and direct pulp capping                                                      | 2020 | J Dent                                                                                         |
| Abazarian N.; Milani S.; Hamrah M.H.; Shahrabi M.S.                                                                       | Management and Follow-Up of Complicated Crown Fractures with Intrusive Luxation of Maxillary Incisors in an 8-Year-Old Boy                                      | 2021 | Case Reports in Dentistry                                                                      |
| Nayak G., Singh I.                                                                                                        | Management of a maxillary second molar                                                                                                                          | 2013 | Dentistry today                                                                                |
| Anilkumar K, Lingeswaran S, Ari G, Thyagarajan R, Logaranjani A.                                                          | Management of Chronic Hyperplastic Pulpitis in Mandibular Molars of Middle Aged Adults- A Multidisciplinary Approach                                            | 2016 | J Clin Diagn Res                                                                               |
| Shafuria A.; Dwiarie T.A.; Hidayat W.                                                                                     | Management of Chronic Ulcer Mimicking Oral Squamous Cell Carcinoma in Down Syndrome Child with Motoric Disorders                                                | 2022 | International Medical Case Reports Journal                                                     |
| Verma P.K.; Srivastava R.; Gupta K.K.; Srivastava A.                                                                      | Management of combined endodontic - periodontal lesion: Case reports                                                                                            | 2012 | Medico-Legal Update                                                                            |
| Asgary S.; Fazlyab M.                                                                                                     | Management of complicated crown fracture with miniature pulpotomy: A case report                                                                                | 2014 | Iranian Endodontic Journal                                                                     |
| Bjørndal L, Simon S, Tomson PL, Duncan HF.                                                                                | Management of deep caries and the exposed pulp                                                                                                                  | 2019 | Int Endod J                                                                                    |
| Tedesco T.K., Reis T.M., Mello-Moura A.C.V., Silva G.S.D., Scarpini S., Floriano I., Gimenez T., Mendes F.M., Raggio D.P. | Management of deep caries lesions with or without pulp involvement in primary teeth: a systematic review and network meta-analysis                              | 2020 | Brazilian oral research                                                                        |
| Rathi S., Nikhade P., Jaiswal A., Jaiswal A., Chandak M., Rathi C.                                                        | Management of deep carious lesion with single visit indirect pulp capping: A case report                                                                        | 2020 | Indian Journal of Forensic Medicine and Toxicology                                             |
| Croft K, Kervanto-Seppälä S, Stangvaltaite L, Kerosuo E.                                                                  | Management of deep carious lesions and pulps exposed during carious tissue removal in adults: a questionnaire study among dentists in Finland                   | 2019 | Clin Oral Investig                                                                             |
| Pozos-Guillén A, Molina G, Soviero V, Arthur RA, Chavarria-Bolaños D, Acevedo AM.                                         | Management of dental caries lesions in Latin American and Caribbean countries                                                                                   | 2021 | Braz Oral Res                                                                                  |
| Timmerman A., Parashos P.                                                                                                 | Management of dental pain in primary care                                                                                                                       | 2020 | Australian Prescriber                                                                          |
| Singh S., Gupta K., Dhull K.S., Ashika B.K., Kudagi V.S., Gupta A.                                                        | MANAGEMENT OF EARLY CHILDHOOD CARIES IN A 5-YEAR-OLD CHILD USING THE DISTINCTIVE OMEGA POSTS - A CASE REPORT                                                    | 2022 | Journal of Pharmaceutical Negative Results                                                     |
| Mehra M., Grover R., Pandit I.K., Srivastava N., Gugnani N., Gupta M.                                                     | Management of grossly decayed primary anteriors using various intracanal post systems: A clinical study                                                         | 2016 | Journal of the Indian Society of Pedodontics and Preventive Dentistry                          |
| Tzanetakis G.N.                                                                                                           | Management of Intruded Immature Maxillary Central Incisor with Pulp Necrosis and Severe External Resorption by Regenerative Approach                            | 2018 | Journal of Endodontics                                                                         |
| Deepak S.; Anjaneyulu K.; Nivedhitha M.S.                                                                                 | MANAGEMENT OF LARGE PERIAPICAL LESION USING PRF MIXED WITH BONE GRAFT – A CASE REPORTS                                                                          | 2021 | International Journal of Clinical Dentistry                                                    |
| Kishan K.V., Das D., Chhabra N., Rathore V.P.S., Remy V.                                                                  | Management of maxillary first molar with six canals using operating microscope                                                                                  | 2018 | Indian journal of dental research : official publication of Indian Society for Dental Research |
| Karunakaran J.V.; Shobana R.; Kumar M.; Kumar S.; Mankar S.                                                               | Management of middle mesial canal in mandibular second molar                                                                                                    | 2012 | Journal of Pharmacy and Bioallied Sciences                                                     |
| Srinivasan R.; Ravishanker P.                                                                                             | Management of middle mesial canal under dental operating microscope                                                                                             | 2015 | Medical Journal Armed Forces India                                                             |
| Robles Raya P.; Javierre Miranda A.P.; Moreno Millán N.; Mas Casals A.; de Frutos Echániz E.; Morató Agustí M.L.          | Management of odontogenic infections in Primary Care: Antibiotic?; Manejo de las infecciones odontogénicas en las consultas de atención primaria: ¿antibiótico? | 2017 | Atencion Primaria                                                                              |
| Sierra-Lorenzo A.; Herrera-García A.; Alonso-Ezpeleta L.O.; Segura-Egea J.J.                                              | Management of perforating internal root resorption with periodontal surgery and mineral trioxide aggregate: A case report with 5-year follow-up                 | 2013 | International Journal of Periodontics and Restorative Dentistry                                |



|                                                                                                    |                                                                                                                                                                                                                              |      |                                                                                                 |
|----------------------------------------------------------------------------------------------------|------------------------------------------------------------------------------------------------------------------------------------------------------------------------------------------------------------------------------|------|-------------------------------------------------------------------------------------------------|
| Stangvaltaite L, Schwendicke F, Holmgren C, Finet M, Maltz M, Elhennawy K, Kerosuo E, Doméjean S.  | Management of pulps exposed during carious tissue removal in adults: a multi-national questionnaire-based survey                                                                                                             | 2017 | Clin Oral Investig                                                                              |
| Tonini R., Boschi G., Salgarello S.A.                                                              | Management of seven external cervical resorptions                                                                                                                                                                            | 2020 | Giornale Italiano di Endodonzia                                                                 |
| Motwani N., Ikhar A., Nikhade P., Bhonde R., Jaiswal S., Zamare V.                                 | Management of single rooted mandibular second molar with single canal: Two case reports                                                                                                                                      | 2020 | Indian Journal of Forensic Medicine and Toxicology                                              |
| Joseph E.J., Anupama Nayak P., Rao A.                                                              | Management of talons cusp in a primary maxillary central incisor: A rare case report                                                                                                                                         | 2019 | Indian Journal of Public Health Research and Development                                        |
| Bettie N., Kandasamy S., Prasad V.                                                                 | Management of tooth surface loss of varying etiology with full mouth all ceramic computer-aided design/computer-aided manufacture restorations                                                                               | 2017 | Journal of Pharmacy and Bioallied Sciences                                                      |
| Thomas J.; Arumugam E.; Harris A.; Ravi V.                                                         | Management of traumatized immature vital tooth: A case report                                                                                                                                                                | 2019 | Journal of Pharmacy and Bioallied Sciences                                                      |
| Kamareh S., Kazem M., Foroozandeh M., Gohari A.                                                    | Management of two taurodont primary molars with pulp involvement using calcium-enriched mixture cement pulpotomy in a patient with accompanied drug reaction with eosinophilia and systemic symptoms syndrome: A case report | 2019 | Biomedical Research and Therapy                                                                 |
| Palomino-Delgado M., Coaguila-Llerena H., Mendiola-Aquino C., Faria G.                             | Management of unfavorable iatrogenic perforations during post placement using mineral trioxide aggregate: Report of two cases                                                                                                | 2021 | Revista Estomatologica Herediana                                                                |
| Alnahwi TH, Alhamad M, Majeed A, Nazir MA.                                                         | Management preferences of deep caries in permanent teeth among dentists in Saudi Arabia                                                                                                                                      | 2018 | Eur J Dent                                                                                      |
| Chee Koh S.W., Li C.F., Pheng Loh J.S., Wong M.L., Keong Loh V.W.                                  | Managing tooth pain in general practice                                                                                                                                                                                      | 2019 | Singapore Medical Journal                                                                       |
| Gonçalves N., Pereira B., Meirinhos J., Pires M.D., Vasconcelos I., Martins J.N.R., Ginjeira A.    | Mandibular first molar root canal retreatment with the presence of a missed middle mesial root canal: A report of two cases                                                                                                  | 2021 | Giornale Italiano di Endodonzia                                                                 |
| Wu D., Zhang J., Wang W., Xin B.-C.                                                                | Mandibular first molar with C-shaped root canal system: a two-case report                                                                                                                                                    | 2018 | Hua xi kou qiang yi xue za zhi = Huaxi kouqiang yixue zazhi = West China journal of stomatology |
| Gaur A.; Trivedi H.P.; Gupta M.; Sharma A.; Likhyani L.; Agarwal M.                                | Mandibular first molar with vertucci type I canal configuration diagnosed with the help of cone beam computed tomography: A rare case report                                                                                 | 2015 | Journal of Contemporary Dental Practice                                                         |
| Zhang M.; Xie J.; Wang Y.-H.; Feng Y.                                                              | Mandibular first premolar with five root canals: A case report                                                                                                                                                               | 2020 | BMC Oral Health                                                                                 |
| Du Y.; Lee A.H.; Zhang C.                                                                          | Mandibular first premolar with four canals.                                                                                                                                                                                  | 2013 | Journal of investigative and clinical dentistry                                                 |
| Kakkar P, Singh A.                                                                                 | Mandibular first premolar with three roots: a case report                                                                                                                                                                    | 2012 | Iran Endod J                                                                                    |
| Kupczik K, Delezene LK, Skinner MM.                                                                | Mandibular molar root and pulp cavity morphology in Homo naledi and other Plio-Pleistocene hominins                                                                                                                          | 2019 | J Hum Evol                                                                                      |
| Thompson P.W.; Williams J.K.                                                                       | Mandibular Osteomyelitis and Cervical Lymphadenitis Due to Mycobacterium abscessus: Surgical Management of a Pediatric Cohort With a Shared Epidemiologic Exposure                                                           | 2017 | The Journal of craniofacial surgery                                                             |
| Roy A.; Velmurugan N.; Suresh N.                                                                   | Mandibular second molar with a single root and a single canal: Case series                                                                                                                                                   | 2013 | Journal of Clinical and Diagnostic Research                                                     |
| Niavarzi S, Ghabraei S, Malekpour F.                                                               | Mandibular Second Premolar with Four Canals: A Case Report                                                                                                                                                                   | 2022 | Iran Endod J                                                                                    |
| Chen Y, Chen X, Zhang Y, Zhou F, Deng J, Zou J, Wang Y.                                            | Materials for pulpotomy in immature permanent teeth: a systematic review and meta-analysis                                                                                                                                   | 2019 | BMC Oral Health                                                                                 |
| Santos P.S.D., Pedrotti D., Braga M.M., Rocha R.O., Lenzi T.L.                                     | Materials used for indirect pulp treatment in primary teeth: a mixed treatment comparisons meta-analysis                                                                                                                     | 2017 | Brazilian oral research                                                                         |
| Nugroho J.J.; Sumidarti A.; Siri M.; Cangara M.H.; Natsir N.; Tanumihardja M.; Hikmah N.; Asrianti | Matrix metalloproteinase-1 (MMP-1) expression and density of collagen fibers following application of haruan fish (channa striata) extract in inflamed pulp of wistar rat                                                    | 2020 | Systematic Reviews in Pharmacy                                                                  |
| Sambandam V, Neelakantan P.                                                                        | Matrix metalloproteinases (mmp) in restorative dentistry and endodontics                                                                                                                                                     | 2014 | J Clin Pediatr Dent                                                                             |
| Atabek D, Sillelioglu H, Çınar Ç, Ölmez A.                                                         | Maturogenesis of an Early Erupted Immature Permanent Tooth: A Case Report With 7-Year Follow-Up                                                                                                                              | 2015 | J Clin Pediatr Dent                                                                             |
| Sibal A.J.; Singi S.R.                                                                             | Maxillary 1st molar with three canals in mesiobuccal root                                                                                                                                                                    | 2022 | Pan African Medical Journal                                                                     |

|                                                                                                                                                 |                                                                                                                                                |      |                                                                   |
|-------------------------------------------------------------------------------------------------------------------------------------------------|------------------------------------------------------------------------------------------------------------------------------------------------|------|-------------------------------------------------------------------|
| Rodrigues E, Braitt AH, Galvão BF, da Silva EJ.                                                                                                 | Maxillary first molar with 7 root canals diagnosed using cone-beam computed tomography                                                         | 2017 | Restor Dent Endod                                                 |
| Shi JJ.                                                                                                                                         | Maxillary first molar with two palatal canals: a case report                                                                                   | 2013 | Shanghai Kou Qiang Yi Xue                                         |
| Rahimi S, Ghasemi N.                                                                                                                            | Maxillary first molar with two root canals                                                                                                     | 2013 | Sultan Qaboos Univ Med J                                          |
| Lea C.; Deblinger J.; Machado R.; Nogueira Leal Silva E.J.; Vansan L.P.                                                                         | Maxillary premolar with 4 separate canals                                                                                                      | 2014 | Journal of Endodontics                                            |
| Suresh M., Karthikeyan K., Mahalaxmi S.                                                                                                         | Maxillary second molar with fused root and six canals- a case report.                                                                          | 2017 | Journal of Clinical and Diagnostic Research                       |
| Kalyani Behera A., Nasim I.                                                                                                                     | Maxillary sinusitis of endodontic origin – decision analysis                                                                                   | 2020 | International Journal of Pharmaceutical Research                  |
| Wyss F, Müller J, Clauss M, Kircher P, Geyer H, von Rechenberg B, Hatt JM.                                                                      | Measuring Rabbit ( <i>Oryctolagus cuniculus</i> ) Tooth Growth and Eruption by Fluorescence Markers and Bur Marks                              | 2016 | J Vet Dent                                                        |
| Dos Santos Neto A.P.; Maia S.M.A.S.; Leão J.C.; Quidute I.L.; Guimarães C.S.; Alves Júnior S.; Álvares P.R.; Ribeiro M.I.G.; Silva L.B.         | Mechanisms involved in apice closure of pulpless teeth – literature review                                                                     | 2021 | Open Dentistry Journal                                            |
| Petrukhina NB, Zorina OA, Venediktova VA.                                                                                                       | Mechanisms of age-related changes in the morphology of the pulp system of the first lower molars                                               | 2022 | Stomatologiia (Mosk)                                              |
| Kantrong N.; Jit-Armart P.; Arayatrakoollikit U.                                                                                                | Melatonin antagonizes lipopolysaccharide-induced pulpal fibroblast responses                                                                   | 2020 | BMC Oral Health                                                   |
| Guerrero-gironés J.; Alcaina-lorente A.; Ortiz-ruiz C.; Ortiz-Ruiz E.; Pecci-lloret M.P.; Rodríguez-lozano F.J.; Martínez C.M.; Ortiz-ruiz A.J. | Melatonin as an agent for direct pulp-capping treatment                                                                                        | 2020 | International Journal of Environmental Research and Public Health |
| Li J.-G.; Lin J.-J.; Wang Z.-L.; Cai W.-K.; Wang P.-N.; Jia Q.; Zhang A.-S.; Wu G.-Y.; Zhu G.-X.; Ni L.-X.                                      | Melatonin attenuates inflammation of acute pulpitis subjected to dental pulp injury                                                            | 2015 | American Journal of Translational Research                        |
| Inostroza C.; Vega-Letter A.M.; Brizuela C.; Castrillón L.; Saint Jean N.; Duran C.M.; Carrión F.                                               | Mesenchymal Stem Cells Derived from Human Inflamed Dental Pulp Exhibit Impaired Immunomodulatory Capacity In Vitro                             | 2020 | Journal of Endodontics                                            |
| Lim K.-T.; Patil T.V.; Patel D.K.; Dutta S.D.; Ganguly K.; Randhawa A.                                                                          | Mesenchymal stem cells, the secretome and biomaterials: Regenerative medicine application                                                      | 2022 | Biocell                                                           |
| Corica A, Caprioglio A.                                                                                                                         | Meta-analysis of the prevalence of tooth wear in primary dentition                                                                             | 2014 | Eur J Paediatr Dent                                               |
| Brodzikowska A.; Gondek A.; Rak B.; Paskal W.; Pełka K.; Cudnoch-Jędrzejewska A.; Włodarski P.                                                  | Metalloproteinase 14 (MMP-14) and hsa-miR-410-3p expression in human inflamed dental pulp and odontoblasts                                     | 2019 | Histochemistry and Cell Biology                                   |
| Cardoso F.P.; De Faria Amormino S.A.; Dutra W.O.; Ribeiro Sobrinho A.P.; Moreira P.R.                                                           | Methylation pattern of the CD14 and TLR2 genes in human dental pulp                                                                            | 2014 | Journal of Endodontics                                            |
| Luo H.; Liu W.; Zhang Y.; Yang Y.; Jiang X.; Wu S.; Shao L.                                                                                     | METTL3-mediated m6A modification regulates cell cycle progression of dental pulp stem cells                                                    | 2021 | Stem Cell Research and Therapy                                    |
| Gatta V.; Zizzari V.L.; Dd ' Amico V.; Salini L.; D' Aurora M.; Franchi S.; Antonucci I.; Sberna M.T.; Gherlone E.; Stuppia L.; Tetè S.         | Microarray evaluation of gene expression profiles in inflamed and healthy human dental pulp: the role of IL1beta and CD40 in pulp inflammation | 2012 | Journal of biological regulators and homeostatic agents           |
| Pereira R.S.; Rodrigues V.A.A.; Furtado W.T.; Gueiros S.; Pereira G.S.; Avila-Campos M.J.                                                       | Microbial analysis of root canal and periradicular lesion associated to teeth with endodontic failure                                          | 2017 | Anaerobe                                                          |
| Moraes LC, Lang PM, Arcanjo RA, Rampelotto PH, Fatturi-Parolo CC, Ferreira MBC, Montagner F.                                                    | Microbial ecology and predicted metabolic pathways in various oral environments from patients with acute endodontic infections                 | 2020 | Int Endod J                                                       |
| Fouad A.F.                                                                                                                                      | Microbial Factors and Antimicrobial Strategies in Dental Pulp Regeneration                                                                     | 2017 | Journal of Endodontics                                            |
| Tekbas Atay M, Koray F.                                                                                                                         | Microbiological and SEM assessment of atraumatic restorative treatment in adult dentition                                                      | 2021 | Clin Oral Investig                                                |
| Subramaniam P.; Tabrez T.A.; Girish Babu K.L.                                                                                                   | Microbiological assessment of root canals following use of rotary and manual instruments in primary molars                                     | 2013 | Journal of Clinical Pediatric Dentistry                           |
| Barbosa-Ribeiro M.; Arruda-Vasconcelos R.; Louzada L.M.; Lima A.R.; Marciano M.A.; Almeida J.F.A.;                                              | Microbiological investigation in teeth with persistent/secondary endodontic infection in different stages of root canal retreatment            | 2020 | European Endodontic Journal                                       |

|                                                                                                                      |                                                                                                                                                                                                              |      |                                                       |
|----------------------------------------------------------------------------------------------------------------------|--------------------------------------------------------------------------------------------------------------------------------------------------------------------------------------------------------------|------|-------------------------------------------------------|
| Dejesus-Soares A.; Zaia A.A.; Ferraz C.C.R.; Gomes B.P.F.A.                                                          |                                                                                                                                                                                                              |      |                                                       |
| Hernández M.; Planells P.; Martínez E.; Mira A.; Carda-Diéguez M.                                                    | Microbiology of molar–incisor hypomineralization lesions. A pilot study                                                                                                                                      | 2020 | Journal of Oral Microbiology                          |
| Fouad A.F.; Diogenes A.R.; Torabinejad M.; Hargreaves K.M.                                                           | Microbiome Changes during Regenerative Endodontic Treatment Using Different Methods of Disinfection                                                                                                          | 2022 | Journal of Endodontics                                |
| Zheng J, Wu Z, Niu K, Xie Y, Hu X, Fu J, Tian D, Fu K, Zhao B, Kong W, Sun C, Wu L.                                  | Microbiome of Deep Dentinal Caries from Reversible Pulpitis to Irreversible Pulpitis                                                                                                                         | 2019 | J Endod                                               |
| Rôças I.N.; Alves F.R.F.; Rachid C.T.C.C.; Lima K.C.; Assunção I.V.; Gomes P.N.; Siqueira J.F., Jr.                  | Microbiome of Deep Dentinal Caries Lesions in Teeth with Symptomatic Irreversible Pulpitis                                                                                                                   | 2016 | PLoS ONE                                              |
| Aydın Z.U., Keskin N.B., Özyürek T., Geneci F., Ocak M., Çelik H.H.                                                  | Microcomputed Assessment of Transportation, Centering Ratio, Canal Area, and Volume Increase after Single-file Rotary and Reciprocating Glide Path Instrumentation in Curved Root Canals: A Laboratory Study | 2019 | Journal of endodontics                                |
| Filpo-Perez C., Bramante C.M., Villas-Boas M.H., Húngaro Duarte M.A., Versiani M.A., Ordinola-Zapata R.              | Micro-computed tomographic analysis of the root canal morphology of the distal root of mandibular first molar                                                                                                | 2015 | Journal of endodontics                                |
| Alshehri M., Alamri H.M., Alshwaimi E., Kujan O.                                                                     | Micro-computed tomographic assessment of quality of obturation in the apical third with continuous wave vertical compaction and single match taper sized cone obturation techniques                          | 2016 | Scanning                                              |
| Xu K., Wang J., Wang K., Gen N., Li J.                                                                               | Micro-computed tomographic evaluation of the effect of the final apical size prepared by rotary nickel-titanium files on the removal efficacy of hard-tissue debris                                          | 2018 | Journal of International Medical Research             |
| Berutti E, Moccia E, Lavino S, Multari S, Carpegna G, Scotti N, Pasqualini D, Alovisi M.                             | Micro-Computed Tomography Evaluation of Minimally Invasive Shaping Systems in Mandibular First Molars                                                                                                        | 2022 | J Clin Med                                            |
| Jambura PL, Kindlimann R, López-Romero F, Marramà G, Pfaff C, Stumpf S, Türtcher J, Underwood CJ, Ward DJ, Kriwet J. | Micro-computed tomography imaging reveals the development of a unique tooth mineralization pattern in mackerel sharks (Chondrichthyes; Lamniformes) in deep time                                             | 2019 | Sci Rep                                               |
| Lin X, Fu Y, Ren G, Yang X, Duan W, Chen Y, Zhang Q.                                                                 | Micro-Computed Tomography-Guided Artificial Intelligence for Pulp Cavity and Tooth Segmentation on Cone-beam Computed Tomography                                                                             | 2021 | J Endod                                               |
| Kalantar Motamed M.R., Mortaheb A., Zare Jahromi M., Gilbert B.E.                                                    | Micro-CT Evaluation of Four Root Canal Obturation Techniques                                                                                                                                                 | 2021 | Scanning                                              |
| Phonghanyudh A.; Thana-olarn C.; Teanchai C.; Jirattanasopha V.                                                      | Microhardness of sub-restoration dentine in primary molars after carious tissue removal to soft and firm dentine                                                                                             | 2021 | Pediatric Dental Journal                              |
| Farto J.; Canalda Sahli C.; Boj J.R.                                                                                 | Microleakage of MTA in primary molar pulpotomies                                                                                                                                                             | 2017 | European Journal of Paediatric Dentistry              |
| Donyavi Z., Khoshbin E., Esmaeilzadeh M., Rezaei-Soufi L., Kermani N.                                                | Microleakage of two root-end filling materials in the cavities prepared by laser and ultrasonic technique: An in-vitro study                                                                                 | 2017 | Italian Journal of Vascular and Endovascular Surgery  |
| Yuan H.; Zhao H.; Wang J.; Zhang H.; Hong L.; Li H.; Che H.; Zhang Z.                                                | MicroRNA let-7c-5p promotes osteogenic differentiation of dental pulp stem cells by inhibiting lipopolysaccharide-induced inflammation via HMGA2/PI3K/Akt signal blockade                                    | 2019 | Clinical and Experimental Pharmacology and Physiology |
| Yuan H.; Zhang H.; Hong L.; Zhao H.; Wang J.; Li H.; Che H.; Zhang Z.                                                | MicroRNA let-7c-5p suppressed lipopolysaccharide-induced dental pulp inflammation by inhibiting dentin matrix protein-1-mediated nuclear factor kappa b (NF- $\kappa$ b) pathway in vitro and in vivo        | 2018 | Medical Science Monitor                               |
| Jiang L.; Krongbamee T.; Lin X.; Zhu M.; Zhu Y.; Hong L.                                                             | microRNA-126 inhibits vascular cell adhesion molecule-1 and interleukin-1beta in human dental pulp cells                                                                                                     | 2022 | Journal of Clinical Laboratory Analysis               |
| Yang C.; Jia R.; Zuo Q.; Zheng Y.; Wu Q.; Luo B.; Lin P.; Yin L.                                                     | microRNA-143-3p regulates odontogenic differentiation of human dental pulp stem cells through regulation of the osteoprotegerin–RANK ligand pathway by targeting RANK                                        | 2020 | Experimental Physiology                               |
| Li B.; Guo L.; He Y.; Tu X.; Zhong J.; Guan H.; Jiang Y.; Jiang Q.                                                   | MicroRNA-155 expression is associated with pulpitis progression by targeting SHIP1                                                                                                                           | 2022 | Molecular Biology Reports                             |
| Jiang W.; Sun S.; Wang D.; Qiu J.; Song Y.; Zhang Q.; He W.; Song B.; Zhang Y.; Wang S.                              | MicroRNA-22 suppresses NLRP3/CASP1 inflammasome pathway-mediated proinflammatory cytokine production by targeting the HIF-1 $\alpha$ and NLRP3 in human dental pulp fibroblasts                              | 2022 | International Endodontic Journal                      |

|                                                                                                                                         |                                                                                                                                                                                                                                                                 |      |                                                                        |
|-----------------------------------------------------------------------------------------------------------------------------------------|-----------------------------------------------------------------------------------------------------------------------------------------------------------------------------------------------------------------------------------------------------------------|------|------------------------------------------------------------------------|
| Wang D.; Sun S.; Xue Y.; Qiu J.; Ye T.; Zhang R.; Song B.; He W.; Zhang Y.; Jiang W.                                                    | MicroRNA-223 negatively regulates LPS-induced inflammatory responses by targeting NLRP3 in human dental pulp fibroblasts                                                                                                                                        | 2021 | International Endodontic Journal                                       |
| Wang J.; Du Y.; Deng J.; Wang X.; Long F.; He J.                                                                                        | MicroRNA-506 is involved in regulation of the occurrence of lipopolysaccharides (LPS)-induced pulpitis by sirtuin 1 (SIRT1)                                                                                                                                     | 2019 | Medical Science Monitor                                                |
| Shen Z.; Silva R.M.                                                                                                                     | Micromas: Emerging players in apical periodontitis                                                                                                                                                                                                              | 2021 | Journal of Applied Oral Science                                        |
| Anthrayose P.; Aggarwal A.; Yadav S.; Nawal R.; Talwar S.                                                                               | Microscopic and elemental characterization of hydrated dental pulp capping agents                                                                                                                                                                               | 2021 | Journal of Conservative Dentistry                                      |
| Kanafi M.; Majumdar D.; Bhonde R.; Gupta P.; Datta I.                                                                                   | Midbrain cues dictate differentiation of human dental pulp stem cells towards functional dopaminergic neurons                                                                                                                                                   | 2014 | Journal of Cellular Physiology                                         |
| Kirici D.O., Koc S.                                                                                                                     | Middle distal canal of mandibular first molar: A case report and literature review                                                                                                                                                                              | 2019 | Nigerian journal of clinical practice                                  |
| Jabali A.H.                                                                                                                             | Middle Mesial and Middle Distal Canals in Mandibular First Molar                                                                                                                                                                                                | 2018 | The journal of contemporary dental practice                            |
| Park Y.H.; Lee Y.S.; Seo Y.M.; Seo H.; Park J.S.; Bae H.S.; Park J.C.                                                                   | Midkine Promotes Odontoblast-like Differentiation and Tertiary Dentin Formation                                                                                                                                                                                 | 2020 | Journal of Dental Research                                             |
| Zain S, Davis GR, Hill R, Anderson P, Baysan A.                                                                                         | Mineral exchange within restorative materials following incomplete carious lesion removal using 3D non-destructive XMT subtraction methodology                                                                                                                  | 2020 | J Dent                                                                 |
| Daniele L.                                                                                                                              | Mineral Trioxide Aggregate (MTA) direct pulp capping: 10 years clinical results; Incappucciamento diretto della polpa con Mineral Trioxide Aggregate: risultati clinici a 10 anni                                                                               | 2017 | Giornale Italiano di Endodonzia                                        |
| Subay RK, Ilhan B, Ulukapi H.                                                                                                           | Mineral trioxide aggregate as a pulpotomy agent in immature teeth: Long-term case report                                                                                                                                                                        | 2013 | Eur J Dent                                                             |
| Wang Y.; Yan M.; Fan Z.; Ma L.; Yu Y.; Yu J.                                                                                            | Mineral trioxide aggregate enhances the odonto/osteogenic capacity of stem cells from inflammatory dental pulps via NF-κB pathway                                                                                                                               | 2014 | Oral Diseases                                                          |
| Qudeimat M.A.; Alyahya A.; Hasan A.A.; Barrieshi-Nusair K.M.                                                                            | Mineral trioxide aggregate pulpotomy for permanent molars with clinical signs indicative of irreversible pulpitis: a preliminary study                                                                                                                          | 2017 | International Endodontic Journal                                       |
| Kim Y.-J.; Kim W.-J.; Bae S.-W.; Yang S.-M.; Park S.-Y.; Kim S.-M.; Jung J.-Y.                                                          | Mineral trioxide aggregate-induced AMPK activation stimulates odontoblastic differentiation of human dental pulp cells                                                                                                                                          | 2021 | International Endodontic Journal                                       |
| de Melo C.C.D.S.B.; Cassiano F.B.; Bronze-Uhle É.S.; Stuaní V.D.T.; Bordini E.A.F.; Gallinari M.D.O.; de Souza Costa C.A.; Soares D.G.  | Mineral-induced bubbling effect and biomineralization as strategies to create highly porous and bioactive scaffolds for dentin tissue engineering                                                                                                               | 2022 | Journal of Biomedical Materials Research - Part B Applied Biomaterials |
| Asgary S.; Nourzadeh M.; Eghbal M.J.                                                                                                    | Miniature pulpotomy of symptomatic mature permanent teeth: A report of two cases                                                                                                                                                                                | 2016 | Iranian Endodontic Journal                                             |
| BaniHani A, Hamid A, Van Eeckhoven J, Gizani S, Albadri S.                                                                              | Minimal Intervention Dentistry (MID) mainstream or unconventional option? Study exploring the impact of COVID-19 on paediatric dentists' views and practices of MID for managing carious primary teeth in children across the United Kingdom and European Union | 2022 | Eur Arch Paediatr Dent                                                 |
| BaniHani A, Santamaría RM, Hu S, Maden M, Albadri S.                                                                                    | Minimal intervention dentistry for managing carious lesions into dentine in primary teeth: an umbrella review                                                                                                                                                   | 2022 | Eur Arch Paediatr Dent                                                 |
| Freitas M.F.L.; Santos J.M.; Fuks A.; Bezerra A.C.B.; Azevedo T.D.P.L.                                                                  | Minimal Intervention Dentistry procedures: A ten year retrospective study                                                                                                                                                                                       | 2014 | Journal of Clinical Pediatric Dentistry                                |
| Chaussain C.; Poliard A.                                                                                                                | Minimal intervention dentistry: Part 8. Biotherapies for the dental pulp                                                                                                                                                                                        | 2014 | British Dental Journal                                                 |
| Gatón-Hernández P, Serrano CR, da Silva LAB, de Castañeda ER, da Silva RAB, Pucinelli CM, Manton D, Ustrell-Torrent JM, Nelson-Filho P. | Minimally interventive restorative care of teeth with molar incisor hypomineralization and open apex-A 24-month longitudinal study                                                                                                                              | 2020 | Int J Paediatr Dent                                                    |
| Opal S, Garg S, Dhindsa A, Taluja T.                                                                                                    | Minimally invasive clinical approach in indirect pulp therapy and healing of deep carious lesions                                                                                                                                                               | 2014 | J Clin Pediatr Dent                                                    |
| Philip N.; Suneja B.                                                                                                                    | Minimally invasive endodontics: a new era for pulpotomy in mature permanent teeth                                                                                                                                                                               | 2022 | British Dental Journal                                                 |
| Zhang Y.-F.; Zhou L.; Mao H.-Q.; Yang F.-H.; Chen Z.; Zhang L.                                                                          | Mitochondrial DNA leakage exacerbates odontoblast inflammation through gasdermin D-mediated pyroptosis                                                                                                                                                          | 2021 | Cell Death Discovery                                                   |

|                                                                                                                                                                                 |                                                                                                                                                                                                  |      |                                               |
|---------------------------------------------------------------------------------------------------------------------------------------------------------------------------------|--------------------------------------------------------------------------------------------------------------------------------------------------------------------------------------------------|------|-----------------------------------------------|
| Zhou L, Zhang YF, Yang FH, Mao HQ, Chen Z, Zhang L.                                                                                                                             | Mitochondrial DNA leakage induces odontoblast inflammation via the cGAS-STING pathway                                                                                                            | 2021 | Cell Commun Signal                            |
| Bushmanova G.M.; Zorina I.G.; Nikityuk D.B.; Nepomnyashchikh R.D.; Lapii G.A.; Postnikova O.A.; Semenov D.E.                                                                    | Mitral and aortic valvulitis in primary chronic septic endocarditis                                                                                                                              | 2015 | Bulletin of Experimental Biology and Medicine |
| Muromachi K.; Kamio N.; Narita T.; Annen-Kamio M.; Sugiyu H.; Matsushima K.                                                                                                     | MMP-3 provokes CTGF/CCN2 production independently of protease activity and dependently on dynamin-related endocytosis, which contributes to human dental pulp cell migration                     | 2012 | Journal of Cellular Biochemistry              |
| Ballal N.V.; Duncan H.F.; Wiedemeier D.B.; Rai N.; Jalan P.; Bhat V.; Belle V.S.; Zehnder M.                                                                                    | MMP-9 Levels and NaOCl Lavage in Randomized Trial on Direct Pulp Capping                                                                                                                         | 2022 | Journal of Dental Research                    |
| Nakashima M.; Iohara K.                                                                                                                                                         | Mobilized dental pulp stem cells for pulp regeneration: Initiation of clinical trial                                                                                                             | 2014 | Journal of Endodontics                        |
| Jawad S., Taylor C., Roudsari R.V., Darcey J., Qualtrough A.                                                                                                                    | Modern Endodontic Planning Part 1: Assessing Complexity and Predicting Success                                                                                                                   | 2015 | Dental update                                 |
| Takegawa D.; Nakanishi T.; Hirao K.; Yumoto H.; Takahashi K.; Matsuo T.                                                                                                         | Modulatory roles of interferon- $\gamma$ through indoleamine 2, 3-dioxygenase induction in innate immune response of dental pulp cells                                                           | 2014 | Journal of endodontics                        |
| Nomura R.; Ogaya Y.; Matayoshi S.; Morita Y.; Nakano K.                                                                                                                         | Molecular and clinical analyses of Helicobacter pylori colonization in inflamed dental pulp                                                                                                      | 2018 | BMC Oral Health                               |
| Alexandru-Andrei I., Perlea P., Irina-Maria G., Mihai M., Loredana M., Iren M., Sinziana S., Erdoğan Ş., Andrei I.                                                              | Molecular Mechanisms of Dentine-Pulp Complex Response Induced by Microbiome of Deep Caries                                                                                                       | 2019 | ARS Medica Tomitana                           |
| Bhardwaj A.; Kottoor J.; Albuquerque D.V.; Velmurugan N.                                                                                                                        | Morphologic variations in mandibular premolars: A report of three cases                                                                                                                          | 2015 | Journal of Contemporary Dental Practice       |
| Lee JH, Lee C, Battulga B, Na JY, Hwang JJ, Kim YH, Han SS.                                                                                                                     | Morphological analysis of the lower second premolar for age estimation of Korean adults                                                                                                          | 2017 | Forensic Sci Int                              |
| Bertonnier-Brouty L, Viriot L, Joly T, Charles C.                                                                                                                               | Morphological features of tooth development and replacement in the rabbit Oryctolagus cuniculus                                                                                                  | 2020 | Arch Oral Biol                                |
| Stefanova V.P.; Tomov G.T.; Tsanova S.Ts.                                                                                                                                       | Morphological Study Of Border Area Of Pulp-Capping Materials And Er:YAG Laser Prepared Hard Dental Surface                                                                                       | 2015 | Folia medica                                  |
| Chen L.; Liu G.; Wu J.; Zhou X.; Zhao Y.; Chen Z.; Lin Z.; Xiao Y.                                                                                                              | Multi-faceted effects of mesenchymal stem cells (MSCs) determined by immune microenvironment and their implications on MSC/biomaterial-based inflammatory disease therapy                        | 2020 | Applied Materials Today                       |
| Chi C.-W.; Lohanathan B.P.; Wong C.-C.; Chen C.-L.; Lin H.-C.; Chiang Y.-C.                                                                                                     | Multiple growth factors accommodated degradable submicron calcium sulfate hemihydrate/porous hydroxyapatite for dentin-pulp regeneration                                                         | 2022 | Biomaterials Advances                         |
| Seung JG, Kim JG, Yang YM, Lee DW.                                                                                                                                              | Multiple Idiopathic Internal Root Resorption in an Adolescent: A Case R Multiple Idiopathic Internal Root Resorption in an Adolescent: A Case Report                                             | 2021 | J Clin Pediatr Dent                           |
| Lee S.-I.; Kang S.-K.; Jung H.-J.; Chun Y.-H.; Kwon Y.-D.; Kim E.-C.                                                                                                            | Muramyl dipeptide activates human beta defensin 2 and pro-inflammatory mediators through Toll-like receptors and NLRP3 inflammasomes in human dental pulp cells                                  | 2015 | Clinical Oral Investigations                  |
| Abuzenada B.M.; Souror Y.R.; Waly A.S.; Khelifa Y.H.A.                                                                                                                          | Mutans streptococci growth on glass ionomer incorporated with chlorhexidine: In-vivo study; Crescimento de estreptococos mutans em ionômero de vidro incorporado com clorexidina: Estudo in vivo | 2020 | Brazilian Dental Science                      |
| Xiong F, Ji Z, Liu Y, Zhang Y, Hu L, Yang Q, Qiu Q, Zhao L, Chen D, Tian Z, Shang X, Zhang L, Wei X, Liu C, Yu Q, Zhang M, Cheng J, Xiong J, Li D, Wu X, Yuan H, Zhang W, Xu X. | Mutation in SSUH2 Causes Autosomal-Dominant Dentin Dysplasia Type I                                                                                                                              | 2017 | Hum Mutat                                     |
| Suwanchai A.; Theerapiboon U.; Chattipakorn N.; Chattipakorn S.C.                                                                                                               | Na V1.8, but not Na V1.9, is upregulated in the inflamed dental pulp tissue of human primary teeth                                                                                               | 2012 | International Endodontic Journal              |
| Chiang Y.-C.; Chang H.-H.; Wong C.-C.; Wang Y.-P.; Wang Y.-L.; Huang W.-H.; Lin C.-P.                                                                                           | Nanocrystalline calcium sulfate/hydroxyapatite biphasic compound as a TGF- $\beta$ 1/VEGF reservoir for vital pulp therapy                                                                       | 2016 | Dental Materials                              |
| Lee D.-K.; Kim S.V.; Limansubroto A.N.; Yen A.; Soundia A.; Wang C.-Y.; Shi W.; Hong C.; Tetradis S.; Kim Y.; Park N.-H.; Kang M.K.; Ho D.                                      | Nanodiamond-Gutta Percha Composite Biomaterials for Root Canal Therapy                                                                                                                           | 2015 | ACS Nano                                      |

|                                                                                                                                                                                                                                                            |                                                                                                                                                          |      |                                                                      |
|------------------------------------------------------------------------------------------------------------------------------------------------------------------------------------------------------------------------------------------------------------|----------------------------------------------------------------------------------------------------------------------------------------------------------|------|----------------------------------------------------------------------|
| Kuang R, Zhang Z, Jin X, Hu J, Shi S, Ni L, Ma PX.                                                                                                                                                                                                         | Nanofibrous spongy microspheres for the delivery of hypoxia-primed human dental pulp stem cells to regenerate vascularized dental pulp                   | 2016 | Acta Biomater                                                        |
| Mendes Soares I.P.; Anselmi C.; Kitagawa F.A.; Ribeiro R.A.D.O.; Leite M.L.; de Souza Costa C.A.; Hebling J.                                                                                                                                               | Nano-hydroxyapatite-incorporated polycaprolactone nanofibrous scaffold as a dentin tissue engineering-based strategy for vital pulp therapy              | 2022 | Dental Materials                                                     |
| Ji Y.; Choi S.K.; Sultan A.S.; Chuncai K.; Lin X.; Dashtimoghadam E.; Melo M.A.; Weir M.; Xu H.; Tayebi L.; Nie Z.; Depireux D.A.; Masri R.                                                                                                                | Nanomagnetic-mediated drug delivery for the treatment of dental disease                                                                                  | 2018 | Nanomedicine: Nanotechnology, Biology, and Medicine                  |
| Corral Nunez C.; Altamirano Gaete D.; Maureira M.; Martin J.; Covarrubias C.                                                                                                                                                                               | Nanoparticles of bioactive glass enhance biodentine bioactivity on dental pulp stem cells                                                                | 2021 | Materials                                                            |
| Lee S.M.; Leem D.H.                                                                                                                                                                                                                                        | Nasal septal abscess with a dental origin: A case report and a review of the literature                                                                  | 2021 | Journal of the Korean Association of Oral and Maxillofacial Surgeons |
| Sun S.; Sun J.; Jiang W.; Wang W.; Ni L.                                                                                                                                                                                                                   | Nav1.7 via promotion of ERK in the trigeminal ganglion plays an important role in the induction of pulpitis inflammatory pain                            | 2019 | BioMed Research International                                        |
| Deng Z.; Yan W.; Dai X.; Chen M.; Qu Q.; Wu B.; Zhao W.                                                                                                                                                                                                    | N-Cadherin Regulates the Odontogenic Differentiation of Dental Pulp Stem Cells via $\beta$ -Catenin Activity                                             | 2021 | Frontiers in Cell and Developmental Biology                          |
| Cao R.; Wang Q.; Wu J.; Liu M.; Han Q.; Wang X.                                                                                                                                                                                                            | Nell-1 attenuates lipopolysaccharide-induced inflammation in human dental pulp cells                                                                     | 2021 | Journal of Molecular Histology                                       |
| Han Q, Wang Q, Wu J, Li M, Fang Y, Zhu H, Wang X.                                                                                                                                                                                                          | Nell-1 promotes the neural-like differentiation of dental pulp cells                                                                                     | 2019 | Biochem Biophys Res Commun                                           |
| Gomes N.A.; do Valle I.B.; Gleber-Netto F.O.; Silva T.A.; Oliveira H.M.D.C.; de Oliveira R.F.; Ferreira L.D.A.Q.; Castilho L.S.; Reis P.H.R.G.; Prazeres P.H.D.M.; Menezes G.B.; de Magalhães C.S.; Mesquita R.A.; Marques M.M.; Birbrair A.; Diniz I.M.A. | Nestin and NG2 transgenes reveal two populations of perivascular cells stimulated by photobiomodulation                                                  | 2022 | Journal of Cellular Physiology                                       |
| Sampoerno G.; Bhardwaj A.; Divina P.Y.; Friptiwi N.N.; Adipradana N.H.                                                                                                                                                                                     | Neurogenic Inflammation Pathway on the Up-Regulation of Voltage-Gated Sodium Channel NaV1.7 in Experimental Flare-Up Post-Dental Pulp Tissue Extirpation | 2022 | Journal of International Dental and Medical Research                 |
| Dagna A.                                                                                                                                                                                                                                                   | Nickel-Titanium Single-file System in Endodontics                                                                                                        | 2015 | Journal of Contemporary Dental Practice                              |
| Omar O.M.; Khattab N.M.; Khater D.S.                                                                                                                                                                                                                       | Nigella sativa oil as a pulp medicament for pulpotomized teeth: A histopathological evaluation                                                           | 2012 | Journal of Clinical Pediatric Dentistry                              |
| Song Z.; Lin Z.; He F.; Jiang L.; Qin W.; Tian Y.; Wang R.; Huang S.                                                                                                                                                                                       | NLRP3 is expressed in human dental pulp cells and tissues                                                                                                | 2012 | Journal of Endodontics                                               |
| Tian X.X.; Li R.; Liu C.; Liu F.; Yang L.J.; Wang S.P.; Wang C.L.                                                                                                                                                                                          | NLRP6-caspase 4 inflammasome activation in response to cariogenic bacterial lipoteichoic acid in human dental pulp inflammation                          | 2021 | International Endodontic Journal                                     |
| Elkhadem A, Sami I.                                                                                                                                                                                                                                        | No clear evidence of superiority regarding pulp medicaments in primary molars                                                                            | 2014 | Evid Based Dent                                                      |
| Lee S.-I.; Kim G.-T.; Kim H.J.; Park S.-H.; Kim E.-C.                                                                                                                                                                                                      | NOD2 Mediates odontoblast differentiation and RANKL expression                                                                                           | 2014 | Journal of Dental Research                                           |
| Okuno M.; Harada K.; Inoue H.; Moroto H.; Zhang H.; Zhang R.; Mu M.; Hosoyama C.; Hosoyama Y.; Fukawa A.; Sugimoto W.; Matsumoto N.; Yamamoto K.; Goda S.                                                                                                  | NOD2 Regulates the Production of MMP-3 in Human Deciduous Dental Pulp Fibroblast-like Cells                                                              | 2021 | Nano Biomedicine                                                     |
| Nanjannawar G.; Mulla S.; Gupta D.; Kamat S.                                                                                                                                                                                                               | Non surgical management of class I invasive cervical resorption and anterior aesthetic rehabilitation: A case report with 2-years follow-up              | 2021 | Tropical Journal of Pharmaceutical Research                          |
| Kunert G.G.; Kunert I.R.; De Figueiredo J.A.P.; Barletta F.B.; Estrela C.                                                                                                                                                                                  | Nonconventional therapeutic protocol for type III dens invaginatus                                                                                       | 2017 | Journal of Contemporary Dental Practice                              |
| Hervella M, Iñiguez MG, Izagirre N, Anta A, de-la-Rúa C.                                                                                                                                                                                                   | Nondestructive methods for recovery of biological material from human teeth for DNA extraction                                                           | 2015 | J Forensic Sci                                                       |
| Sinescu C.; Negruțiu M.L.; Bradu A.; Duma V.-F.; Podoleanu A.G.                                                                                                                                                                                            | Noninvasive quantitative evaluation of the dentin layer during dental procedures using optical coherence tomography                                      | 2015 | Computational and Mathematical Methods in Medicine                   |
| Yue W., Kim E.                                                                                                                                                                                                                                             | Nonsurgical Endodontic Management of a Molar-Incisor Malformation-affected Mandibular First Molar: A Case Report                                         | 2016 | Journal of endodontics                                               |

|                                                                                             |                                                                                                                                                                           |      |                                                                                                              |
|---------------------------------------------------------------------------------------------|---------------------------------------------------------------------------------------------------------------------------------------------------------------------------|------|--------------------------------------------------------------------------------------------------------------|
| Musale P.K., Kothare S.                                                                     | Non-surgical endodontic management of immature permanent mandibular first molar: a 3 year follow-up                                                                       | 2018 | European archives of paediatric dentistry : official journal of the European Academy of Paediatric Dentistry |
| Kato H.                                                                                     | Non-surgical endodontic treatment for dens invaginatus type III using cone beam computed tomography and dental operating microscope: a case report                        | 2013 | Bull Tokyo Dent Coll                                                                                         |
| Mashyakhy M., Chourasia H.R., Halboub E., Roges R.A., Gambarini G.                          | Nonsurgical Management and 2-year Follow-up by means of Cone Beam Computed Tomography of an Invasive Cervical Resorption in a Molar                                       | 2018 | The journal of contemporary dental practice                                                                  |
| Ghorbanzadeh S.; Ashraf H.; Hosseinpour S.; Ghorbanzadeh F.                                 | Nonsurgical management of a large periapical lesion: A case report                                                                                                        | 2017 | Iranian Endodontic Journal                                                                                   |
| Varghese L.L.; Bhattacharya A.; Sharma P.; Apratim A.                                       | Non-surgical management of an extraoral cutaneous sinus tract of odontogenic origin                                                                                       | 2020 | BMJ Case Reports                                                                                             |
| Tamilselvi R., Megavarnan R., Prakash V., Subbiya A.                                        | Nonsurgical management of periapical lesion with external root resorption followed by orthodontic treatment in maxillary lateral incisor                                  | 2019 | Indian Journal of Public Health Research and Development                                                     |
| Patil S.S.; Yamuna S.                                                                       | Nonvital Pulp Therapy for Primary Teeth                                                                                                                                   | 2021 | Pediatric dentistry                                                                                          |
| Park C.-S.; Cha S.-Y.; Kang M.; Kim J.; Jeong S.-W.; Jang H.-K.                             | Nonvital pulp therapy of elongation of roots of mandibular cheek teeth in pet rabbits                                                                                     | 2012 | Journal of Veterinary Clinics                                                                                |
| Wang L, Fu H, Wang W, Liu Y, Li X, Yang J, Li L, Wu G, Pan Y.                               | Notoginsenoside R1 functionalized gelatin hydrogels to promote reparative dentinogenesis                                                                                  | 2021 | Acta Biomater                                                                                                |
| Livingstone D.; Manivasakan S.; Shivashankarappa P.G.                                       | Novel Endodontic Simulation Trainer for Dental Pulpotomy and Pulp Capping                                                                                                 | 2022 | Journal of International Oral Health                                                                         |
| Okamoto M.; Takahashi Y.; Komichi S.; Ali M.; Yoneda N.; Ishimoto T.; Nakano T.; Hayashi M. | Novel evaluation method of dentin repair by direct pulp capping using high-resolution micro-computed tomography                                                           | 2018 | Clinical Oral Investigations                                                                                 |
| Wu S.; Weir M.D.; Lei L.; Liu J.; Xu H.H.K.                                                 | Novel nanographene oxide-calcium phosphate cement inhibits Enterococcus faecalis biofilm and supports dental pulp stem cells                                              | 2021 | Journal of Orthopaedic Surgery and Research                                                                  |
| Baras B.H.; Sun J.; Melo M.A.S.; Tay F.R.; Oates T.W.; Zhang K.; Weir M.D.; Xu H.H.K.       | Novel root canal sealer with dimethylaminohexadecyl methacrylate, nano-silver and nano-calcium phosphate to kill bacteria inside root dentin and increase dentin hardness | 2019 | Dental Materials                                                                                             |
| Gug H.R.; Park Y.-H.; Park S.-J.; Jang J.Y.; Lee J.-H.; Lee D.-S.; Shon W.-J.; Park J.-C.   | Novel strategy for dental caries by physiologic dentin regeneration with CPNE7 peptide                                                                                    | 2022 | Archives of Oral Biology                                                                                     |
| Kumar S., Kiran K.P., Achutha G., Muthe K., Surana P., Sagare S.V.                          | Nusmile zirconia crowns: Pedodontist perception to restore esthetic smiles                                                                                                | 2021 | European Journal of Molecular and Clinical Medicine                                                          |
| Wang X.; Sun H.; Hu Z.; Mei P.; Wu Y.; Zhu M.                                               | NUTM2A-AS1 silencing alleviates LPS-induced apoptosis and inflammation in dental pulp cells through targeting let-7c-5p/HMGB1 axis                                        | 2021 | International Immunopharmacology                                                                             |
| Serindere G, Belgin CA, Orhan K.                                                            | Observation of the Pulp Chamber of Maxillary First Premolars: A Micro-computed Tomographic Study                                                                          | 2020 | Curr Med Imaging                                                                                             |
| Rosenberg L, Atar M, Daronch M, Honig A, Chey M, Funny MD, Cruz L.                          | Observational: prospective study of indirect pulp treatment in primary molars using resin-modified glass ionomer and 2% chlorhexidine gluconate: a 12-month Follow-up     | 2013 | Pediatr Dent                                                                                                 |
| Balto H.A.                                                                                  | Obturation Techniques Allow Microbial Leakage Unless Protected                                                                                                            | 2016 | Journal of prosthodontics : official journal of the American College of Prosthodontists                      |
| Asif A., Emg S.                                                                             | Obturation techniques in primary teeth                                                                                                                                    | 2020 | International Journal of Research in Pharmaceutical Sciences                                                 |
| Carvalho JC, Dige I, Machiulskiene V, Qvist V, Bakhshandeh A, Fatturi-Parolo C, Maltz M.    | Occlusal Caries: Biological Approach for Its Diagnosis and Management                                                                                                     | 2016 | Caries Res                                                                                                   |
| Pollaris E.; Staszuk C.; Proost K.; Boone M.N.; Josipovic I.; Pardon B.; Vlaminck L.        | Occlusal fissures in equine cheek teeth: $\mu$ CT and histological findings                                                                                               | 2020 | Veterinary Journal                                                                                           |
| Liu L.; Huang R.; Yang R.; Wei X.                                                           | OCT4B1 regulates the cellular stress response of human dental pulp cells with inflammation                                                                                | 2017 | BioMed Research International                                                                                |
| Farges J.-C.; Alliot-Licht B.; Baudouin C.; Msika P.; Bleicher F.; Carrouel F.              | Odontoblast control of dental pulp inflammation triggered by cariogenic bacteria                                                                                          | 2013 | Frontiers in Physiology                                                                                      |

|                                                                                                                                                                                                               |                                                                                                                                                                                                    |      |                                                  |
|---------------------------------------------------------------------------------------------------------------------------------------------------------------------------------------------------------------|----------------------------------------------------------------------------------------------------------------------------------------------------------------------------------------------------|------|--------------------------------------------------|
| Chang S.-W.; Bae W.-J.; Yi J.-K.; Lee S.; Lee D.-W.; Kum K.-Y.; Kim E.-C.                                                                                                                                     | Odontoblastic Differentiation, Inflammatory Response, and Angiogenic Potential of 4 Calcium Silicate-based Cements: Micromega MTA, ProRoot MTA, RetroMTA, and Experimental Calcium Silicate Cement | 2015 | Journal of Endodontics                           |
| Wang H.S.; Yang F.H.; Wang Y.J.; Pei F.; Chen Z.; Zhang L.                                                                                                                                                    | Odontoblastic Exosomes Attenuate Apoptosis in Neighboring Cells                                                                                                                                    | 2019 | Journal of Dental Research                       |
| Babaki D.; Matin M.M.                                                                                                                                                                                         | Odontoblast-like Cytodifferentiation of Dental Stem Cells: A review                                                                                                                                | 2020 | Iranian Endodontic Journal                       |
| Park S.-J.; Heo S.-M.; Hong S.-O.; Hwang Y.-C.; Lee K.-W.; Min K.-S.                                                                                                                                          | Odontogenic effect of a fast-setting pozzolan-based pulp capping material                                                                                                                          | 2014 | Journal of Endodontics                           |
| Kim K.-A.; Yang Y.-M.; Kwon Y.-S.; Hwang Y.-C.; Yu M.-K.; Min K.-S.                                                                                                                                           | Odontogenic effects of a fast-setting calcium-silicate cement containing zirconium oxide                                                                                                           | 2015 | Dental Materials Journal                         |
| Önay E.O.; Yurtcu E.; Terzi Y.K.; Üngör M.; Oguz Y.; Şahin F.I.                                                                                                                                               | Odontogenic effects of two calcium silicate-based biomaterials in human dental pulp cells                                                                                                          | 2018 | Advances in Clinical and Experimental Medicine   |
| Sato K.                                                                                                                                                                                                       | Odontogenic maxillary sinusitis caused by dental restoration                                                                                                                                       | 2014 | Nihon Jibiinkoka Gakkai Kaiho                    |
| Fransson H.                                                                                                                                                                                                   | On the repair of the dentine barrier.                                                                                                                                                              | 2012 | Swedish dental journal. Supplement               |
| Al-Attiya H.; Schmoedel J.; Mourad M.S.; Splieth C.H.                                                                                                                                                         | One year clinical success of pulpectomy in primary molars with iodoform-calcium hydroxide paste                                                                                                    | 2021 | Quintessence International                       |
| Villat C, Attal JP, Brulat N, Decup F, Doméjean S, Dursun E, Fron-Chabouis H, Jacquot B, Muller Bolla M, Plasse-Pradelle N, Roche L, Maucourt-Boulch D, Nony P, Gritsch K, Millet P, Gueyffier F, Grosgeat B. | One-step partial or complete caries removal and bonding with antibacterial or traditional self-etch adhesives: study protocol for a randomized controlled trial                                    | 2016 | Trials                                           |
| de Araújo L.P., de Azevedo Kinalski M., Carpena L.P., Ferraz C.C.R., Dos Santos M.B.F.                                                                                                                        | One-year follow-up of endodontic retreatment in a patient with severe Hemophilia A                                                                                                                 | 2022 | Giornale Italiano di Endodonzia                  |
| Ricketts D, Lamont T, Innes NP, Kidd E, Clarkson JE.                                                                                                                                                          | Operative caries management in adults and children                                                                                                                                                 | 2013 | Cochrane Database Syst Rev                       |
| Soares de Toubes KM, Moreira Maia L, Cota Goulart L, de Freitas Teixeira T, Silva NRFA, Isaías Seraidarian P, Silveira FF.                                                                                    | Optimization of Results for Cracked Teeth Using CAD-CAM System: A Case Series                                                                                                                      | 2020 | Iran Endod J                                     |
| Ohshima H, Mishima K, Amizuka N.                                                                                                                                                                              | Oral biosciences: The annual review 2021                                                                                                                                                           | 2022 | J Oral Biosci                                    |
| Yip K, Smales R.                                                                                                                                                                                              | Oral diagnosis and treatment planning: part 2. Dental caries and assessment of risk                                                                                                                | 2012 | Br Dent J                                        |
| Duarte-Rodrigues L, Ramos-Jorge ML, Alves-Duarte AC, Fonseca-Silva T, Flores-Mir C, Marques LS.                                                                                                               | Oral disorders associated with the experience of verbal bullying among Brazilian school-aged children: A case-control study                                                                        | 2020 | J Am Dent Assoc                                  |
| Wehby G.L.                                                                                                                                                                                                    | Oral Health and Academic Achievement of Children in Low-Income Families                                                                                                                            | 2022 | Journal of Dental Research                       |
| Shulamithi P.S.; Kulkarni S.; Doshi D.; Reddy M.P.; Srilatha A.; Satyanarayana D.                                                                                                                             | Oral Health Illness Perception and Dental Caries: A Cross-sectional Study among Adult Dental Patients, Hyderabad, Telangana, India                                                                 | 2022 | World Journal of Dentistry                       |
| Folwaczny M., Wilberg S., Bumm C., Hollatz S., Oberhofer R., Neidenbach R.C., Kaemmerer H., Frasheri I.                                                                                                       | Oral health in adults with congenital heart disease                                                                                                                                                | 2019 | Journal of Clinical Medicine                     |
| Singh D.P.                                                                                                                                                                                                    | Oral Health in Leprosy as a Public Health Issue in India: Review of Literature                                                                                                                     | 2021 | Indian Journal of Leprosy                        |
| Zhong C., Ma K.N., Wong Y.S., So Y., Lee P.C., Yang Y.                                                                                                                                                        | Oral Health Knowledge of Pregnant Women on Pregnancy Gingivitis and Children's Oral Health                                                                                                         | 2015 | The Journal of clinical pediatric dentistry      |
| Oh T.J., Nam O.H., Kim M.S., Choi S.C., Lee H.-S.                                                                                                                                                             | Oral Health of Patients with Special Health Care Needs After General Anesthesia: A 25- Year Retrospective Study                                                                                    | 2018 | Pediatric dentistry                              |
| Karki S, Laitala ML, Humagain M, Seppänen M, Pääkila J, Anttonen V.                                                                                                                                           | Oral health status associated with sociodemographic factors of Nepalese schoolchildren: a population-based study                                                                                   | 2018 | Int Dent J                                       |
| Chen C.-Y.; Chen Y.-W.; Tsai T.-P.; Shih W.-Y.                                                                                                                                                                | Oral health status of children with special health care needs receiving dental treatment under general anesthesia at the dental clinic of Taipei Veterans General Hospital in Taiwan               | 2014 | Journal of the Chinese Medical Association       |
| Jain A.; Jayaraj G.; Pradeep Kumar R.                                                                                                                                                                         | Oral lesions in diabetes mellitus patients visiting a dental hospital                                                                                                                              | 2020 | International Journal of Pharmaceutical Research |



|                                                                                                                    |                                                                                                                                                    |      |                                                         |
|--------------------------------------------------------------------------------------------------------------------|----------------------------------------------------------------------------------------------------------------------------------------------------|------|---------------------------------------------------------|
| Cowan G.M.; Lockey R.F.                                                                                            | Oral Manifestations of Allergic, Infectious, and Immune-mediated Disease                                                                           | 2014 | Journal of Allergy and Clinical Immunology: In Practice |
| Brunet-Llobet L.; Lahor-Soler E.; Miranda-Rius J.                                                                  | Oral pain due to severe pre-eruptive intracoronal resorption in permanent tooth                                                                    | 2014 | European Journal of Paediatric Dentistry                |
| Brkić Z., Pijevčević N., Pavlić V., Petronijević M.                                                                | Oral rehabilitation of a patient with temporomandibular joint ankylosis caused by ankylosing spondylitis: A case report                            | 2017 | Vojnosanitetski Pregled                                 |
| Zhang W., Wang J., Yu X., Wang W.                                                                                  | Orofacial granulomatosis: A case report of three cases may be caused by apical periodontitis                                                       | 2017 | Medicine (United States)                                |
| Nishihara C.; Hatori K.; Hsu Y.-C.; Ozasa K.; Young A.; Imamura Y.; Noma N.                                        | Orofacial pain and menstrually related migraine                                                                                                    | 2019 | Acta Neurologica Taiwanica                              |
| Rathore K., Naik D., Lenka S., Nagarajappa R., Das U.                                                              | Orthodontic considerations for traumatized teeth: An overview                                                                                      | 2020 | Indian Journal of Forensic Medicine and Toxicology      |
| Thiesen G, Oliver DR, Araújo EA.                                                                                   | Orthodontic treatment of a patient with maxillary lateral incisors with dens invaginatus: 6-year follow-up                                         | 2018 | Am J Orthod Dentofacial Orthop                          |
| Nikolaeva EP, Cox TC, Flake NM.                                                                                    | Osseous characteristics of mice lacking cannabinoid receptor 2 after pulp exposure                                                                 | 2015 | J Endod                                                 |
| Abd-Elmeguid A.; Abdeldayem M.; Kline L.W.; Moqbel R.; Vliagoftis H.; Yu D.C.                                      | Osteocalcin expression in pulp inflammation                                                                                                        | 2013 | Journal of Endodontics                                  |
| Ajlan S.A.; Ashri N.Y.; Aldahmash A.M.; Alnbaheen M.S.                                                             | Osteogenic differentiation of dental pulp stem cells under the influence of three different materials                                              | 2015 | BMC Oral Health                                         |
| Sato N.; Isomura M.; Kawai R.; Yoshida W.; Sugita Y.; Kubo K.; Funato A.; Ueno N.; Jinno M.; Maeda H.              | Osteogenic potential of rat dental pulp-derived cells on titanium surfaces                                                                         | 2018 | Journal of Hard Tissue Biology                          |
| Pei S.-L.; Shih W.-Y.; Liu J.-F.                                                                                   | Outcome comparison between diode laser pulpotomy and formocresol pulpotomy on human primary molars                                                 | 2020 | Journal of Dental Sciences                              |
| Ricucci D, Rôças IN, Alves FRF, Cabello PH, Siqueira JF Jr.                                                        | Outcome of Direct Pulp Capping Using Calcium Hydroxide: A Long-term Retrospective Study                                                            | 2023 | J Endod                                                 |
| Marques M.S., Wesselink P.R., Shemesh H.                                                                           | Outcome of Direct Pulp Capping with Mineral Trioxide Aggregate: A Prospective Study                                                                | 2015 | Journal of endodontics                                  |
| Hussain MI, Bashar AM.                                                                                             | Outcome of Mineral Trioxide Aggregate Pulpotomy for Mature Permanent Molars with Symptoms Indicative of Irreversible Pulpitis                      | 2022 | Mymensingh Med J                                        |
| Jahreis M.; Soliman S.; Schubert A.; Connert T.; Schlagenhauf U.; Krastl G.; Krug R.                               | Outcome of non-surgical root canal treatment related to periodontitis and chronic disease medication among adults in age group of 60 years or more | 2019 | Gerodontology                                           |
| Elmsmari F, Ruiz XF, Miró Q, Feijoo-Pato N, Durán-Sindreu F, Olivieri JG.                                          | Outcome of Partial Pulpotomy in Cariously Exposed Posterior Permanent Teeth: A Systematic Review and Meta-analysis                                 | 2019 | J Endod                                                 |
| Passia N.; Chaar M.S.; Kern M.                                                                                     | Outcome of posterior fixed dental prostheses made from veneered zirconia over an observation period of up to 13 years                              | 2019 | Journal of Dentistry                                    |
| Ather A.; Patel B.; Gelfond J.A.L.; Ruparel N.B.                                                                   | Outcome of pulpotomy in permanent teeth with irreversible pulpitis: a systematic review and meta-analysis                                          | 2022 | Scientific Reports                                      |
| Llena C., Nicolescu T., Perez S., de Pereda S.G., Gonzalez A., Alarcon I., Monzo A., Sanz J.L., Melo M., Forner L. | Outcome of root canal treatments provided by endodontic postgraduate students. A retrospective study                                               | 2020 | Journal of Clinical Medicine                            |
| Garrocho-Rangel A, Esparza-Villalpando V, Pozos-Guillen A.                                                         | Outcomes of direct pulp capping in vital primary teeth with cariously and non-cariously exposed pulp: A systematic review                          | 2020 | Int J Paediatr Dent                                     |
| Franzon R, Guimarães LF, Magalhães CE, Haas AN, Araujo FB.                                                         | Outcomes of one-step incomplete and complete excavation in primary teeth: a 24-month randomized controlled trial                                   | 2014 | Caries Res                                              |
| Khokhar M.; Tewari S.                                                                                              | Outcomes of partial and complete caries excavation in permanent teeth: A 18 month clinical study                                                   | 2018 | Contemporary Clinical Dentistry                         |
| Alassadi M., Qazi M., Ravidà A., Siqueira R., Garaicoa-Pazmiño C., Wang H.-L.                                      | Outcomes of root resection therapy up to 16.8 years: A retrospective study in an academic setting                                                  | 2020 | Journal of Periodontology                               |
| BaniHani A, Duggal M, Toumba J, Deery C.                                                                           | Outcomes of the conventional and biological treatment approaches for the management of caries in the primary dentition                             | 2018 | Int J Paediatr Dent                                     |

|                                                                                                                     |                                                                                                                                             |      |                                                                   |
|---------------------------------------------------------------------------------------------------------------------|---------------------------------------------------------------------------------------------------------------------------------------------|------|-------------------------------------------------------------------|
| Awawdeh L., Al-Qudah A, Hamouri H, Chakra RJ.                                                                       | Outcomes of Vital Pulp Therapy Using Mineral Trioxide Aggregate or Biodentine: A Prospective Randomized Clinical Trial                      | 2018 | J Endod                                                           |
| Cushley S, Duncan HF, Lundy FT, Nagendrababu V, Clarke M, El Karim I.                                               | Outcomes reporting in systematic reviews on vital pulp treatment: A scoping review for the development of a core outcome set                | 2022 | Int Endod J                                                       |
| Tancharoen S.; Tengrungsun T.; Suddhasthira T.; Kikuchi K.; Vechvongvan N.; Tokuda M.; Maruyama I.                  | Overexpression of receptor for advanced glycation end products and high-mobility group box 1 in human dental pulp inflammation              | 2014 | Mediators of Inflammation                                         |
| Moreno T., Sanz J.L., Melo M., Llena C.                                                                             | Overtreatment in restorative dentistry: Decision making by last-year dental students                                                        | 2021 | International Journal of Environmental Research and Public Health |
| Vengerfeldt V, Mändar R, Saag M, Piir A, Kullisaar T.                                                               | Oxidative stress in patients with endodontic pathologies                                                                                    | 2017 | J Pain Res                                                        |
| Ruparel S.; Hargreaves K.M.; Eskander M.; Rowan S.; De Almeida J.F.A.; Roman L.; Henry M.A.                         | Oxidized linoleic acid metabolite-cytochrome P450 system (OLAM-CYP) is active in biopsy samples from patients with inflammatory dental pain | 2013 | Pain                                                              |
| Kumagai T.; Shindo S.; Takeda K.; Shiba H.                                                                          | Oxytocin suppresses CXCL10 production in TNF- $\alpha$ -stimulated human dental pulp stem cells                                             | 2022 | Cell Biology International                                        |
| Nogales C.G.; Ferreira M.B.; Montemor A.F.; Rodrigues M.F.A.; Lage-Marques J.L.; Antoniazzi J.H.                    | Ozone therapy as an adjuvant for endodontic protocols: Microbiological – Ex vivo study and cytotoxicity analyses                            | 2016 | Journal of Applied Oral Science                                   |
| Al-Jundi S.H.; El Shahawy O.I.; Nazzal H.                                                                           | Paediatric dentistry undergraduate education across dental schools in the Arabian region: a cross-sectional study                           | 2021 | European Archives of Paediatric Dentistry                         |
| Olivi G, Caprioglio C, Olivi M, Genovese MD.                                                                        | Paediatric laser dentistry. Part 2: Hard tissue laser applications                                                                          | 2017 | Eur J Paediatr Dent                                               |
| Porporatti A.L.; Bonjardim L.R.; Stuginski-Barbosa J.; Bonfante E.A.; Costa Y.M.; Conti P.C.R.                      | Pain from dental implant placement, inflammatory pulpitis pain, and neuropathic pain present different Somatosensory profiles               | 2017 | Journal of Oral and Facial Pain and Headache                      |
| Debevc D, Hitij T, Kansky A.                                                                                        | Painful neuropathy caused by compression of the inferior alveolar nerve by focal osteosclerotic lesion of the mandible: A case report       | 2017 | Quintessence Int                                                  |
| Pinheiro TN, Cintra LTA, Azuma MM, Benetti F, Silva CC, Consolaro A.                                                | Palatogingival groove and root canal instrumentation                                                                                        | 2020 | Int Endod J                                                       |
| Satpathy A., Mohanty G., Datta P., Mohanty R., Nayak R., Panda S.                                                   | Palatogingival groove and the perio-endo lesion: Management through endo-perio regenerative (IPRF) approach: A case report                  | 2019 | Indian Journal of Public Health Research and Development          |
| Song F.; Sun H.; Wang Y.; Yang H.; Huang L.; Fu D.; Gan J.; Huang C.                                                | Pannexin3 inhibits TNF- $\alpha$ -induced inflammatory response by suppressing NF- $\kappa$ B signalling pathway in human dental pulp cells | 2017 | Journal of Cellular and Molecular Medicine                        |
| Sridhar M.; Mathew M.G.; Meenakshi                                                                                  | PANORAMIC RADIOGRAPHS AND ITS IMPORTANCE IN PEDIATRIC DENTISTRY – A RETROSPECTIVE STUDY                                                     | 2022 | International Journal of Clinical Dentistry                       |
| Gibbs J.L.; Urban R.; Basbaum A.I.                                                                                  | Paradoxical surrogate markers of dental injury-induced pain in the mouse                                                                    | 2013 | Pain                                                              |
| Prasad P., Ahirwal S., Kumar V., Chauhan M.S., Rathor P.                                                            | Paramolar with a para-premolar: A rare occurrence                                                                                           | 2017 | Journal of Clinical and Diagnostic Research                       |
| Al-Batayneh O.B.; Al-Khateeb H.O.; Ibrahim W.M.; Khader Y.S.                                                        | Parental Knowledge and Acceptance of Different Treatment Options for Primary Teeth Provided by Dental Practitioners                         | 2019 | Frontiers in Public Health                                        |
| Meenapriya M.; Gurunathan D.; Rajendran D.                                                                          | Parents concern regarding dental treatment for children during covid-19-a survey                                                            | 2020 | International Journal of Current Research and Review              |
| Manton D.                                                                                                           | Partial caries removal may have advantages but limited evidence on restoration survival                                                     | 2013 | Evid Based Dent                                                   |
| Asgary S.; Roghanizadeh L.                                                                                          | Partial necrosis consequence of the infection spreading from an adjacent apical periodontitis: A case report                                | 2018 | Iranian Endodontic Journal                                        |
| Motoki O.; Fergus D.H.; Yusuke T.; Nanako K.; Matsumoto S.; Mikako H.                                               | Partial Pulpotomy to Successfully Treat a Caries-Induced Pulpal Micro-Abscess: A Case Report                                                | 2021 | Frontiers in Dental Medicine                                      |
| Tuloglu N.; Bayrak S.                                                                                               | Partial pulpotomy with BioAggregate in complicated crown fractures: Three case reports                                                      | 2016 | Journal of Clinical Pediatric Dentistry                           |
| Shchetinin E.V.; Sirak S.V.; Khodzhan A.B.; Dilekova O.V.; Sirak A.G.; Vafiadi M.Y.; Parazyran L.A.; Arutyunov A.V. | Pathogenetic aspects of dental pulp pathology                                                                                               | 2015 | Medical News of North Caucasus                                    |

|                                                                                                                                  |                                                                                                                                                                                                                                               |      |                                                                                  |
|----------------------------------------------------------------------------------------------------------------------------------|-----------------------------------------------------------------------------------------------------------------------------------------------------------------------------------------------------------------------------------------------|------|----------------------------------------------------------------------------------|
| Sirak S.V.; Shchetinin E.V.; Vafiadi M.I.; Parazian L.A.                                                                         | Pathophysiological and morphofunctional reaction of a dental pulp under inflammation                                                                                                                                                          | 2015 | Research Journal of Pharmaceutical, Biological and Chemical Sciences             |
| Schwendicke F., Mostajaboldave R., Otto L., Dörfer C.E., Burkert S.                                                              | Patients' preferences for selective versus complete excavation: A mixed-methods study                                                                                                                                                         | 2016 | Journal of dentistry                                                             |
| Di Giuseppe G.; Lanzano R.; Silvestro A.; Napolitano F.; Pavia M.                                                                | Pattern and Appropriateness of Antimicrobial Prescriptions for Upper Respiratory Tract and Dental Infections in Male Prisoners in Italy                                                                                                       | 2021 | Antibiotics                                                                      |
| Alsaegh M.A., Albadrani A.W.                                                                                                     | Pattern and reasons for permanent tooth extractions at dental clinics of the university of science and technology of Fujairah, UAE                                                                                                            | 2020 | Open Dentistry Journal                                                           |
| Liu Y.; Zhang Z.; Li W.; Tian S.                                                                                                 | PECAM1 Combines With CXCR4 to Trigger Inflammatory Cell Infiltration and Pulpitis Progression Through Activating the NF- $\kappa$ B Signaling Pathway                                                                                         | 2020 | Frontiers in Cell and Developmental Biology                                      |
| da Penha E.S.; Rolim A.K.A.; Dos Santos C.A.O.; Guênes G.M.T.; de Medeiros L.A.D.M.; da Costa C.H.M.                             | Pediatric dentistry content in civil service examinations in the state of Paraíba: How is this specialty being addressed?; Conteúdo de odontopediatria em concursos públicos na Paraíba: De que forma essa especialidade está sendo abordada? | 2020 | Bioscience Journal                                                               |
| Paul R., Ravindran V., Gurunathan D.                                                                                             | Pediatric dentists preference on using hand or rotary instruments in single visit permanent molars                                                                                                                                            | 2020 | International Journal of Research in Pharmaceutical Sciences                     |
| Vieira AM, Ray HL Jr.                                                                                                            | Pediatric Endodontic Treatment of Adolescent Patients                                                                                                                                                                                         | 2021 | Dent Clin North Am                                                               |
| Akshaya K., Ravindran V., Pandurangan S.M.                                                                                       | Pediatric dentists' preference on usage of hand files or rotary files for pulpectomy of primary molars-a retrospective study                                                                                                                  | 2020 | International Journal of Research in Pharmaceutical Sciences                     |
| Kim Y.; Park J.-S.; Park H.-J.; Kim M.-K.; Kim Y.-I.; Bae S.-K.; Kim H.J.; Jeong C.-H.; Bae M.-K.                                | Pentraxin 3 Modulates the Inflammatory Response in Human Dental Pulp Cells                                                                                                                                                                    | 2018 | Journal of Endodontics                                                           |
| Lee W.; Oh J.-H.; Park J.-C.; Shin H.-I.; Baek J.-H.; Ryoo H.-M.; Woo K.M.                                                       | Performance of electrospun poly(-caprolactone) fiber meshes used with mineral trioxide aggregates in a pulp capping procedure                                                                                                                 | 2012 | Acta Biomaterialia                                                               |
| Rechenberg D.-K.; Bostanci N.; Zehnder M.; Belibasakis G.N.                                                                      | Periapical fluid RANKL and IL-8 are differentially regulated in pulpitis and apical periodontitis                                                                                                                                             | 2014 | Cytokine                                                                         |
| Asgary S, Nosrat A, Homayounfar N.                                                                                               | Periapical healing after direct pulp capping with calcium-enriched mixture cement: a case report                                                                                                                                              | 2012 | Oper Dent                                                                        |
| Jersa I.; Kundzina R.                                                                                                            | Periapical status and quality of root fillings in a selected adult Riga population.                                                                                                                                                           | 2013 | Stomatologija / issued by public institution "Odontologijos studija" ... [et al. |
| Duque T.M.; Prado M.; Herrera D.R.; Gomes B.P.F.A.                                                                               | Periodontal and endodontic infectious/inflammatory profile in primary periodontal lesions with secondary endodontic involvement after a calcium hydroxide-based intracanal medication                                                         | 2019 | Clinical Oral Investigations                                                     |
| Cen R., Wang R., Cheung G.S.P.                                                                                                   | Periodontal Blood Flow Protects the Alveolar Bone from Thermal Injury during Thermoplasticized Obturation: A Finite Element Analysis Study                                                                                                    | 2018 | Journal of endodontics                                                           |
| Fontes TV, Ferreira SM, Silva-Júnior A, Dos Santos Marotta P, Noce CW, Ferreira Dde C, Gonçalves LS.                             | Periradicular lesions in HIV-infected patients attending the faculty of dentistry: clinical findings, socio-demographics status, habits and laboratory data - seeking an association                                                          | 2014 | Clinics (Sao Paulo)                                                              |
| Pang YW, Feng J, Daltoe F, Fatscher R, Gentleman E, Gentleman MM, Sharpe PT.                                                     | Perivascular Stem Cells at the Tip of Mouse Incisors Regulate Tissue Regeneration                                                                                                                                                             | 2016 | J Bone Miner Res                                                                 |
| Kunert G.G.; Kunert I.R.; Da Costa Filho L.C.; De Figueiredo J.A.P.                                                              | Permanent teeth pulpotomy survival analysis: Retrospective follow-up                                                                                                                                                                          | 2015 | Journal of Dentistry                                                             |
| Meza G.; Urrejola D.; Saint Jean N.; Inostroza C.; López V.; Khoury M.; Brizuela C.                                              | Personalized Cell Therapy for Pulpitis Using Autologous Dental Pulp Stem Cells and Leukocyte Platelet-rich Fibrin: A Case Report                                                                                                              | 2019 | Journal of Endodontics                                                           |
| Shlezinger M.; Khalifa L.; Hourri-Haddad Y.; Copenhagen-Glazer S.; Resch G.; Que Y.-A.; Beyth S.; Dorfman E.; Hazan R.; Beyth N. | Phage therapy: A new horizon in the antibacterial treatment of oral pathogens                                                                                                                                                                 | 2017 | Current Topics in Medicinal Chemistry                                            |

|                                                                                                                                                              |                                                                                                                                                                                                     |      |                                                          |
|--------------------------------------------------------------------------------------------------------------------------------------------------------------|-----------------------------------------------------------------------------------------------------------------------------------------------------------------------------------------------------|------|----------------------------------------------------------|
| Tabuchi H.; Katsurabara T.; Mori M.; Aoyama M.; Obara T.; Yasuda N.; Kawano T.; Imai T.; Ieiri I.; Kumagai Y.                                                | Pharmacokinetics, Pharmacodynamics, and Safety of E6011, a Novel Humanized Antifractalkine (CX3CL1) Monoclonal Antibody: A Randomized, Double-Blind, Placebo-Controlled Single-Ascending-Dose Study | 2019 | Journal of Clinical Pharmacology                         |
| Hartiala P.; Suominen S.; Suominen E.; Kaartinen I.; Kiiski J.; Viitanen T.; Alitalo K.; Saarikko A.M.                                                       | Phase 1 Lymfactivin® Study: Short-term Safety of Combined Adenoviral VEGF-C and Lymph Node Transfer Treatment for Upper Extremity Lymphedema                                                        | 2020 | Journal of Plastic, Reconstructive and Aesthetic Surgery |
| Lima AR, Ganguly T, Walker AR, Acosta N, Francisco PA, Pileggi R, Lemos JA, Gomes BPFA, Abranches J.                                                         | Phenotypic and Genotypic Characterization of Streptococcus mutans Strains Isolated from Endodontic Infections                                                                                       | 2020 | J Endod                                                  |
| Nutchoey O, Intarak N, Theerapanon T, Thaweasapphithak S, Boonprakong L, Srijunbarl A, Pomtaveetus T, Shotelersuk V.                                         | Phenotypic features of dentinogenesis imperfecta associated with osteogenesis imperfecta and COL1A2 mutations                                                                                       | 2021 | Oral Surg Oral Med Oral Pathol Oral Radiol               |
| Sun G.; Ren Q.; Bai L.; Zhang L.                                                                                                                             | Phoenixin-20 suppresses lipopolysaccharide-induced inflammation in dental pulp cells                                                                                                                | 2020 | Chemico-Biological Interactions                          |
| Vitor L.L.R.; Bergamo M.T.O.P.; Lourenço-Neto N.; Sakai V.T.; Oliveira R.C.; Cruvinel T.; Rios D.; Garlet G.P.; Santos C.F.; Machado M.A.A.M.; Oliveira T.M. | Photobiomodulation effect on angiogenic proteins produced and released by dental pulp cells                                                                                                         | 2020 | Clinical Oral Investigations                             |
| Zaccara I.M.; Mestieri L.B.; Pilar E.F.S.; Moreira M.S.; Grecca F.S.; Martins M.D.; Kopper P.M.P.                                                            | Photobiomodulation therapy improves human dental pulp stem cell viability and migration in vitro associated to upregulation of histone acetylation                                                  | 2020 | Lasers in Medical Science                                |
| Zaccara I.M.; Mestieri L.B.; Moreira M.S.; Grecca F.S.; Martins M.D.; Kopper P.M.P.                                                                          | Photobiomodulation therapy improves multilineage differentiation of dental pulp stem cells in three-dimensional culture model                                                                       | 2018 | Journal of Biomedical Optics                             |
| Sivakumar T.T.; Muruppel A.M.; Joseph A.P.; Reshmi A.; Ramachandran R.; Nair P.D.; Mohan S.P.                                                                | Photobiomodulatory effect delivered by low-level laser on dental pulp stem cell differentiation for osteogenic lineage                                                                              | 2019 | Lasers in Dental Science                                 |
| Okamoto C.B., Bussadori S.K., Prates R.A., da Mota A.C.C., Tempestini Horliana A.C.R., Fernandes K.P.S., Motta L.J.                                          | Photodynamic therapy for endodontic treatment of primary teeth: A randomized controlled clinical trial                                                                                              | 2020 | Photodiagnosis and Photodynamic Therapy                  |
| Zorita-García M.; Alonso-Ezpeleta L.Ó.; Cobo M.; del Campo R.; Rico-Romano C.; Mena-Álvarez J.; Zubizarreta-Macho Á.                                         | Photodynamic therapy in endodontic root canal treatment significantly increases bacterial clearance, preventing apical periodontitis                                                                | 2019 | Quintessence International                               |
| Libório A.L.M.; Viana B.A.S.; Endo M.S.; Pavan N.N.O.                                                                                                        | Photodynamic therapy in the control of endodontic infections                                                                                                                                        | 2018 | Dental Press Endodontics                                 |
| Muhammad O.H.; Chevalier M.; Rocca J.-P.; Brulat-Bouchard N.; Medioni E.                                                                                     | Photodynamic therapy versus ultrasonic irrigation: Interaction with endodontic microbial biofilm, an ex vivo study                                                                                  | 2014 | Photodiagnosis and Photodynamic Therapy                  |
| Moreira M.S.; Sarra G.; Carvalho G.L.; Gonçalves F.; Caballero-Flores H.V.; Pedroni A.C.F.; Lascala C.A.; Catalani L.H.; Marques M.M.                        | Physical and Biological Properties of a Chitosan Hydrogel Scaffold Associated to Photobiomodulation Therapy for Dental Pulp Regeneration: An in Vitro and in Vivo Study                             | 2021 | BioMed Research International                            |
| Abdalla M.M.; Lung C.Y.K.; Bijle M.N.; Yiu C.K.Y.                                                                                                            | Physicochemical Properties and Inductive Effect of Calcium Strontium Silicate on the Differentiation of Human Dental Pulp Stem Cells for Vital Pulp Therapies: An In Vitro Study                    | 2022 | Materials                                                |
| Krishnapriya V, Gaur D, Kumar CS, Shilpa G.                                                                                                                  | Physiological Root End Closure in a Traumatized Young Permanent Tooth Using Collagen Particles as Pulpal Dressing                                                                                   | 2017 | J Clin Diagn Res                                         |
| Nugroho J.J.; Trilaksana A.C.; Rovani C.A.; Natsir N.; Rahim F.                                                                                              | Pizza Technique in Site 1 restoration in lower Second Molar Tooth: A case report                                                                                                                    | 2019 | Journal of International Dental and Medical Research     |
| Gasqui MA, Pérard M, Decup F, Monsarrat P, Turpin YL, Villat C, Gueyffier F, Maucourt-Boulch D, Roche L, Grosgeat B.                                         | Place of a new radiological index in predicting pulp exposure before intervention for deep carious lesions                                                                                          | 2022 | Oral Radiol                                              |
| Machut K., Zoltowska A., Pawlowska E., Derwich M.                                                                                                            | Plasma rich in growth factors in the treatment of endodontic periapical lesions in adult patients: Case reports                                                                                     | 2021 | International Journal of Molecular Sciences              |
| Da Cunha J.M.; Da Costa-Neves A.; Kerkis I.; Da Silva M.C.P.                                                                                                 | Pluripotent stem cell transcription factors during human odontogenesis                                                                                                                              | 2013 | Cell and Tissue Research                                 |
| Gao L.; Fan F.; Wang L.; Tang B.; Wen Z.; Tang J.; Dai T.; Jin H.                                                                                            | Polarization of macrophages in the trigeminal ganglion of rats with pulpitis                                                                                                                        | 2022 | Journal of Oral Rehabilitation                           |

|                                                                                                                                                                                                                                                                                                                                                                                                                                                                                                                                                                                                                                                   |                                                                                                                                                                                           |      |                                                                   |
|---------------------------------------------------------------------------------------------------------------------------------------------------------------------------------------------------------------------------------------------------------------------------------------------------------------------------------------------------------------------------------------------------------------------------------------------------------------------------------------------------------------------------------------------------------------------------------------------------------------------------------------------------|-------------------------------------------------------------------------------------------------------------------------------------------------------------------------------------------|------|-------------------------------------------------------------------|
| Leite M.L.; de Oliveira Ribeiro R.A.; Soares D.G.; Hebling J.; de Souza Costa C.A.                                                                                                                                                                                                                                                                                                                                                                                                                                                                                                                                                                | Poly(caprolactone)-aligned nanofibers associated with fibronectin-loaded collagen hydrogel as a potent bioactive scaffold for cell-free regenerative endodontics                          | 2022 | International Endodontic Journal                                  |
| Trilisinskaya Y.; Smrekova E.; Komlosi M.; Ondova P.; Svobodova H.; Voinescu B.                                                                                                                                                                                                                                                                                                                                                                                                                                                                                                                                                                   | Poor dental health resulting to dental infections among South Sudanese refugees                                                                                                           | 2016 | Lekarsky Obzor                                                    |
| Maroto M.; Barreiro S.; Barbería E.                                                                                                                                                                                                                                                                                                                                                                                                                                                                                                                                                                                                               | Portland cement as pulp dressing agent in pulpotomy treatment of primary molars: A 12-month clinical study                                                                                | 2019 | European Journal of Paediatric Dentistry                          |
| Weber M.-T.; Stratz N.; Fleiner J.; Schulze D.; Hannig C.                                                                                                                                                                                                                                                                                                                                                                                                                                                                                                                                                                                         | Possibilities and limits of imaging endodontic structures with CBCT                                                                                                                       | 2015 | Swiss dental journal                                              |
| Popescu A.D., Popa D.L., Nicola A.G., Dascălu I.T., Petcu C., Tircă T., Tuculina M.J., Mocanu H., Staicu A.N., Gheorghită L.M.                                                                                                                                                                                                                                                                                                                                                                                                                                                                                                                    | Post Placement and Restoration of Endodontically Treated Canines: A Finite Element Analysis Study                                                                                         | 2022 | International Journal of Environmental Research and Public Health |
| El Sayed M., Gaballah K.                                                                                                                                                                                                                                                                                                                                                                                                                                                                                                                                                                                                                          | Postanesthetic Cold Sensibility Test as an Indicator for the Efficacy of Inferior Alveolar Nerve Block in Patients with Symptomatic Irreversible Pulpitis of Mandibular Molars            | 2021 | International Journal of Dentistry                                |
| Eghbal M.J., Haeri A., Shahravan A., Kazemi A., Moazami F., Mozayeni M.A., Saberi E., Samiei M., Vatanpour M., Akbarzade Baghban A., Fazlyab M., Parhizkar A., Ahmadi M., Akbarian Rad N., Bijari S., Bineshmarvasti D., Davoudi P., Dehghan R., Dehghani M., Ebrahimi H., Emami N., Farajian N., Fereidooni R., Ghobadi G., Ghodrati M., Gohari A., Hashemi A., Hosseini M., Karami E., Kheirabadi N., Kozegari S., Labaf Ghasemi H., Majidi A., Malekzadeh P., Mehrabi V., Mohammadi M., Moradi Eslami L., Noghani A., Omatali N., Pourhatami N., Rahbani Nobar B., Rahmani S., Shafaq P., Soofiabadi S., Teimoori S., Vatandoost F., Asgary S. | Postendodontic Pain after Pulpotomy or Root Canal Treatment in Mature Teeth with Carious Pulp Exposure: A Multicenter Randomized Controlled Trial                                         | 2020 | Pain Research and Management                                      |
| Saumya-Rajesh P.; Krithikadatta J.; Velmurugan N.; Sooriaprakas C.                                                                                                                                                                                                                                                                                                                                                                                                                                                                                                                                                                                | Post-instrumentation pain after the use of either Mtwo or the SAF system: a randomized controlled clinical trial                                                                          | 2017 | International Endodontic Journal                                  |
| Zhang Q, Deng X, Wang Y, Huang R, Yang R, Zou J.                                                                                                                                                                                                                                                                                                                                                                                                                                                                                                                                                                                                  | Postoperative complications in Chinese children following dental general anesthesia: A cross-sectional study                                                                              | 2020 | Medicine (Baltimore)                                              |
| Pasqualini D.; Mollo L.; Scotti N.; Cantatore G.; Castellucci A.; Migliaretti G.; Berutti E.                                                                                                                                                                                                                                                                                                                                                                                                                                                                                                                                                      | Postoperative pain after manual and mechanical glide path: A Randomized clinical trial                                                                                                    | 2012 | Journal of Endodontics                                            |
| Erkan E.; Gündoğar M.; Uslu G.; Özyürek T.                                                                                                                                                                                                                                                                                                                                                                                                                                                                                                                                                                                                        | Postoperative pain after SWEEPS, PIPS, sonic and ultrasonic-assisted irrigation activation techniques: a randomized clinical trial                                                        | 2022 | Odontology                                                        |
| Morsy D.A., Negm M., Diab A., Ahmed G.                                                                                                                                                                                                                                                                                                                                                                                                                                                                                                                                                                                                            | Postoperative pain and antibacterial effect of 980 nm diode laser versus conventional endodontic treatment in necrotic teeth with chronic periapical lesions: A randomized control trial. | 2018 | F1000Research                                                     |
| Shafie L.; Barghi H.; Parirokh M.; Ebrahimnejad H.; Nakhae N.; Esmaili S.                                                                                                                                                                                                                                                                                                                                                                                                                                                                                                                                                                         | Postoperative pain following pulpotomy of primary molars with two biomaterials: A randomized split mouth clinical trial                                                                   | 2017 | Iranian Endodontic Journal                                        |
| Kumar A., Jain G., Sharma S., Mishra R., Dhawan J.                                                                                                                                                                                                                                                                                                                                                                                                                                                                                                                                                                                                | Potency Of Manual Instrumentation To The Rotary Instrumentation For Primary Teeth Pulpotomies: A Clinical Comparrative Study                                                              | 2022 | Journal of Pharmaceutical Negative Results                        |
| Zhai Y.; Yuan X.; Zhao Y.; Ge L.; Wang Y.                                                                                                                                                                                                                                                                                                                                                                                                                                                                                                                                                                                                         | Potential Application of Human $\beta$ -Defensin 4 in Dental Pulp Repair                                                                                                                  | 2020 | Frontiers in Physiology                                           |
| Chen Y.-J.; Zhao Y.-H.; Zhao Y.-J.; Liu N.-X.; Lv X.; Li Q.; Chen F.-M.; Zhang M.                                                                                                                                                                                                                                                                                                                                                                                                                                                                                                                                                                 | Potential dental pulp revascularization and odonto-/osteogenic capacity of a novel transplant combined with dental pulp stem cells and platelet-rich fibrin                               | 2015 | Cell and Tissue Research                                          |
| Irusa K.F., Vence B., Donovan T.                                                                                                                                                                                                                                                                                                                                                                                                                                                                                                                                                                                                                  | Potential oral health effects of e-cigarettes and vaping: A review and case reports                                                                                                       | 2020 | Journal of Esthetic and Restorative Dentistry                     |
| Arora S., Cooper P.R., Friedlander L.T., Seo B., Rizwan S.B., Rich A.M., Hussaini H.M.                                                                                                                                                                                                                                                                                                                                                                                                                                                                                                                                                            | Potentiality and Inflammatory Marker Expression Are Maintained in Dental Pulp Cell Cultures from Carious Teeth                                                                            | 2022 | International Journal of Molecular Sciences                       |

|                                                                                                                                                 |                                                                                                                                                                                        |      |                                                                                                                                         |
|-------------------------------------------------------------------------------------------------------------------------------------------------|----------------------------------------------------------------------------------------------------------------------------------------------------------------------------------------|------|-----------------------------------------------------------------------------------------------------------------------------------------|
| Haywood V.B.                                                                                                                                    | Pre-bleaching exam vital for optimum whitening.                                                                                                                                        | 2012 | Compendium of continuing education in dentistry (Jamesburg, N.J. : 1995)                                                                |
| Jiang K.; Che C.; Ding Z.; Zeng S.; Wang W.; He X.                                                                                              | Precision diagnosis and antidiastole on supernumerary cusp of tooth by CBCT                                                                                                            | 2016 | Surgical and Radiologic Anatomy                                                                                                         |
| Chevalier V, Dessert M, Fouillen KJ, Lennon S, Duncan HF.                                                                                       | Preclinical 3D-printed laboratory simulation of deep caries and the exposed pulp reduced student anxiety and stress, while increasing confidence and knowledge in vital pulp treatment | 2022 | Int Endod J                                                                                                                             |
| Gomes M.S.; Böttcher D.E.; Scarparo R.K.; Morgental R.D.; Waltrick S.B.G.; Ghisi A.C.; Rahde N.M.; Borba M.G.; Blomberg L.C.; Figueiredo J.A.P. | Predicting pre- and postoperative pain of endodontic origin in a southern Brazilian subpopulation: an electronic database study                                                        | 2017 | International Endodontic Journal                                                                                                        |
| Law A.S.; Nixdorf D.R.; Aguirre A.M.; Reams G.J.; Tortomasi A.J.; Manne B.D.; Harris D.R.                                                       | Predicting severe pain after root canal therapy in the national dental PBRN                                                                                                            | 2015 | Journal of Dental Research                                                                                                              |
| Galicia J.C.; Guzzi P.H.; Giorgi F.M.; Khan A.A.                                                                                                | Predicting the response of the dental pulp to SARS-CoV2 infection: a transcriptome-wide effect cross-analysis                                                                          | 2020 | Genes and Immunity                                                                                                                      |
| Villa-Chávez C.E.; Patiño-Marín N.; Loyola-Rodríguez J.P.; Zavala-Alonso N.V.; Martínez-Castañón G.A.; Medina-Solís C.E.                        | Predictive values of thermal and electrical dental pulp tests: A clinical study                                                                                                        | 2013 | Journal of Endodontics                                                                                                                  |
| Song M, Alshaikh A, Kim T, Kim S, Dang M, Mehrazarin S, Shin KH, Kang M, Park NH, Kim RH.                                                       | Preexisting Periapical Inflammatory Condition Exacerbates Tooth Extraction-induced Bisphosphonate-related Osteonecrosis of the Jaw Lesions in Mice                                     | 2016 | J Endod                                                                                                                                 |
| Casián-Adem J.; Cobos L.; Waggoner W.F.; Fuks A.B.                                                                                              | Prefabricated zirconia crowns – A solution to treat hypomineralized permanent molars: Report of a case                                                                                 | 2021 | Journal of Clinical Pediatric Dentistry                                                                                                 |
| Ali A.H.; Mahdee A.F.; Fadhil N.H.                                                                                                              | Preferences of treatments and materials used in the management of exPosed PulpPs: a web-based questionnaire study                                                                      | 2022 | Journal of Stomatology                                                                                                                  |
| Mirza A.J., Taqi M., Hatipoglo O., Javaid M.A., Moosa R.                                                                                        | Preferred Technique and Material Choice for exposed pulp among dentists practicing in Karachi                                                                                          | 2022 | Pakistan Journal of Medical and Health Sciences                                                                                         |
| Innes NP, Ricketts D, Chong LY, Keightley AJ, Lamont T, Santamaria RM.                                                                          | Preformed crowns for decayed primary molar teeth                                                                                                                                       | 2015 | Cochrane Database Syst Rev                                                                                                              |
| Wang Q.L.; Yang P.P.; Ge L.H.; Liu H.                                                                                                           | Preliminary Evaluation of Platelet Rich Fibrin-Mediated Tissue Repair in Immature Canine Pulpless Teeth                                                                                | 2016 | The Chinese journal of dental research : the official journal of the Scientific Section of the Chinese Stomatological Association (CSA) |
| Komabayashi T.; Wadajkar A.; Santimano S.; Ahn C.; Zhu Q.; Opperman L.A.; Bellinger L.L.; Yang J.; Nguyen K.T.                                  | Preliminary study of light-cured hydrogel for endodontic drug delivery vehicle                                                                                                         | 2016 | Journal of investigative and clinical dentistry                                                                                         |
| Nivedha V.; Sherwood I.A.; Abbott P.V.; Ramaprabha B.; Bhargavi P.V.                                                                            | Pre-operative ketorolac efficacy with different anesthetics, irrigants during single visit root canal treatment of mandibular molars with acute irreversible pulpitis                  | 2020 | Australian Endodontic Journal                                                                                                           |
| Alqarni M.A.                                                                                                                                    | Preparation of dental implant site by interim endodontic therapy: A case report                                                                                                        | 2020 | European Journal of Molecular and Clinical Medicine                                                                                     |
| Rutkauskas J.; Seale N.S.; Casamassimo P.; Rutkauskas J.S.                                                                                      | Preparedness of Entering Pediatric Dentistry Residents: Advanced Pediatric Program Directors' and First-Year Residents' Perspectives                                                   | 2015 | Journal of Dental Education                                                                                                             |
| Alattas H.A.; Alyami S.H.                                                                                                                       | Prescription of antibiotics for pulpal and periapical pathology among dentists in southern Saudi Arabia                                                                                | 2017 | Journal of Global Antimicrobial Resistance                                                                                              |
| Fraser A.D., Zhang B., Khan H., Ma H., Hersh E.V.                                                                                               | Prescription opioid abuse and its potential role in gross dental decay                                                                                                                 | 2016 | Current Drug Safety                                                                                                                     |
| Suhaib M., Ahmad F., Ahmad M.                                                                                                                   | Prescription pattern of antimicrobial agents among dental practitioners in a tertiary care center in North India                                                                       | 2017 | Asian Journal of Pharmaceutical and Clinical Research                                                                                   |

|                                                                                                                                                                             |                                                                                                                                                                         |      |                                                                   |
|-----------------------------------------------------------------------------------------------------------------------------------------------------------------------------|-------------------------------------------------------------------------------------------------------------------------------------------------------------------------|------|-------------------------------------------------------------------|
| Keleş A., Keskin C.                                                                                                                                                         | Presence of voids after warm vertical compaction and single-cone obturation in band-shaped isthmuses using micro-computed tomography: A phantom study                   | 2020 | Microscopy research and technique                                 |
| Connert T, Weiger R, Krastl G.                                                                                                                                              | Present status and future directions - Guided endodontics                                                                                                               | 2022 | Int Endod J                                                       |
| Duncan HF.                                                                                                                                                                  | Present status and future directions-Vital pulp treatment and pulp preservation strategies                                                                              | 2022 | Int Endod J                                                       |
| Aboujaoude S.; El Noueiri B.                                                                                                                                                | Presentations of Routine Dental Interventions in Children over a Six-Year Period                                                                                        | 2022 | Scientific World Journal                                          |
| Villavicencio Espinoza CA, Ordoñez Aguilera JF, Piola Rizzante FA, Maenosono RM, Franco EB, Ishikiriyama SK.                                                                | Preservation in Young Patients of Pulp Vitality and Anatomical-Functional Restoration of the Lost Structure                                                             | 2017 | Compend Contin Educ Dent                                          |
| Basso M., Van Duinen R.N.B., Miletic I.                                                                                                                                     | Preservation of dental pulp vitality: A fundamental goal for modern conservative dentistry                                                                              | 2018 | Dental Cadmos                                                     |
| Bozbay E.; Dominici F.; Gokbuget A.Y.; Cintan S.; Guida L.; Aydin M.S.; Mariotti A.; Pilloni A.                                                                             | Preservation of root cementum: a comparative evaluation of power-driven versus hand instruments                                                                         | 2018 | International Journal of Dental Hygiene                           |
| Edwards D, Stone S, Bailey O, Tomson P.                                                                                                                                     | Preserving pulp vitality: part one - strategies for managing deep caries in permanent teeth                                                                             | 2021 | Br Dent J                                                         |
| Edwards D.; Stone S.; Bailey O.; Tomson P.                                                                                                                                  | Preserving pulp vitality: part two - vital pulp therapies                                                                                                               | 2021 | British Dental Journal                                            |
| Choi MR, Moon YM, Seo MS.                                                                                                                                                   | Prevalence and features of distolingual roots in mandibular molars analyzed by cone-beam computed tomography                                                            | 2015 | Imaging Sci Dent                                                  |
| Igic M, Obradovic R, Filipovic G.                                                                                                                                           | Prevalence and progression of early childhood caries in Nis, Serbia                                                                                                     | 2018 | Eur J Paediatr Dent                                               |
| Dash G., Mishra L., Singh N.R., Behera R., Misra S.R., Kumar M., Sokolowski K., Agarwal K., Behera S.K., Mishra S., Lapinska B.                                             | Prevalence and Quality of Endodontic Treatment in Patients with Cardiovascular Disease and Associated Risk Factors                                                      | 2022 | Journal of Clinical Medicine                                      |
| Vaishnavi Devi. B.; Delphine Priscilla Antony S.                                                                                                                            | Prevalence of canal variations in mandibular 1st molar in south indian population and association with age and gender                                                   | 2020 | International Journal of Dentistry and Oral Science               |
| De la Torre-Luna R.; Domínguez-Pérez R.A.; Guillén-Nepita A.L.; Ayala-Herrera J.L.; Martínez-Martínez R.E.; Romero-Ayala M.E.; Pérez-Serrano R.M.; Vázquez-Garcidueñas M.S. | Prevalence of Candida albicans in primary endodontic infections associated with a higher frequency of apical periodontitis in type two diabetes mellitus patients       | 2020 | European Journal of Clinical Microbiology and Infectious Diseases |
| Mubarak S, AlOlyan R, AlBrekei J, AlFouzan S, Abosharkh M, AlSaeri N, Baseer MA.                                                                                            | Prevalence of caries in first permanent molar among children in Saudi Arabia: a retrospective study                                                                     | 2022 | Eur Rev Med Pharmacol Sci                                         |
| Ghaffar A., Ahmed Z., Munir M., Saeed A., Parveen N., Rehman S.                                                                                                             | Prevalence of complicated and uncomplicated crown fracture in permanent teeth children age 7-12years                                                                    | 2021 | Pakistan Journal of Medical and Health Sciences                   |
| Naziazareen I., Gheena S., Leelavathi L.                                                                                                                                    | Prevalence of dental caries among outpatients attending a dental college in Chennai                                                                                     | 2019 | Drug Invention Today                                              |
| de Alencar Fernandes J.M.F.; de Oliveira Paredes S.; Bezerra de Almeida D.; Correia Sampaio F.; Soares Forte F.D.                                                           | Prevalence of dental caries and treatment needs in preschool children in a recently fluoridated Brazilian town                                                          | 2013 | Brazilian Journal of Oral Sciences                                |
| Keshaav Krishnaa P., Nasim I., Sandeep A.H.                                                                                                                                 | Prevalence of different reasons for a tooth to undergo root canal retreatment                                                                                           | 2020 | International Journal of Research in Pharmaceutical Sciences      |
| Sousa H.C.S.; de Lima M.D.M.; Lima C.C.B.; de Moura M.S.; Bandeira A.V.L.; de Deus Moura L.F.A.                                                                             | Prevalence of enamel defects in premolars whose predecessors were treated with extractions or antibiotic paste                                                          | 2020 | Oral Health and Preventive Dentistry                              |
| de Oliveira B.P.; Câmara A.C.; Aguiar C.M.                                                                                                                                  | Prevalence of endodontic diseases: An epidemiological evaluation in a Brazilian subpopulation                                                                           | 2016 | Brazilian Journal of Oral Sciences                                |
| Stojanović N.; Krnić J.; Popović B.; Stojičić S.; Živković S.                                                                                                               | Prevalence of Enterococcus faecalis and Porphyromonas gingivalis in infected root canals and their susceptibility to endodontic treatment procedures: A molecular study | 2014 | Srpski Arhiv za Celokupno Lekarstvo                               |
| Ilangovan S., Ravindran V., Mani G.                                                                                                                                         | Prevalence of groopers appliance in pediatric dentistry                                                                                                                 | 2020 | International Journal of Research in Pharmaceutical Sciences      |
| Nivethitha R., Ganapathy D., Dinesh S.P.S.                                                                                                                                  | Prevalence of hypertension in completely edentulous patients                                                                                                            | 2020 | Indian Journal of Forensic Medicine and Toxicology                |

|                                                                                                                                                                                                       |                                                                                                                                                                     |      |                                                                                |
|-------------------------------------------------------------------------------------------------------------------------------------------------------------------------------------------------------|---------------------------------------------------------------------------------------------------------------------------------------------------------------------|------|--------------------------------------------------------------------------------|
| Gabor C.; Tam E.; Shen Y.; Haapasalo M.                                                                                                                                                               | Prevalence of internal inflammatory root resorption                                                                                                                 | 2012 | Journal of Endodontics                                                         |
| Dalabília V.; Gambin D.J.; De-Carli J.P.; Zanette F.                                                                                                                                                  | Prevalence of odontogenic pain in a public dental urgency service in Southern Brazil                                                                                | 2020 | Dental Press Endodontics                                                       |
| Baig M.S., Zahid M., Shaheen J.A., Bhutto R.A.                                                                                                                                                        | Prevalence of odontogenic sinus tracts among dental patients and its oral surgery management at Bahawal Victoria Hospital & Quaid-e-Azam Medical College Bahawalpur | 2016 | Pakistan Journal of Medical and Health Sciences                                |
| Silva E.J.N.L., Prado M.C., Duarte M.A.H., Versiani M.A., Marques D., Martins J.N.R.                                                                                                                  | Prevalence of root canal system configurations in the Brazilian population analyzed by cone-beam computed tomography - a systematic review                          | 2021 | Revista Portuguesa de Estomatologia, Medicina Dentária e Cirurgia Maxilofacial |
| Khosrozadeh M., Mostafavi M., Hamrah M.H., Niknejad E.                                                                                                                                                | Prevalence of Three-Rooted Deciduous Mandibular Molars in the Children of Northwestern Iran                                                                         | 2021 | International Journal of Dentistry                                             |
| Gopal T.M.; Subhashree R.                                                                                                                                                                             | Prevalence of vitality in fixed partial denture done by the undergraduates - A retrospective study                                                                  | 2020 | Indian Journal of Forensic Medicine and Toxicology                             |
| Martins J.N.R., Marques D., Silva E.J.N.L., Caramês J., Versiani M.A.                                                                                                                                 | Prevalence Studies on Root Canal Anatomy Using Cone-beam Computed Tomographic Imaging: A Systematic Review                                                          | 2019 | Journal of endodontics                                                         |
| Dube K, Jain P, Rai A, Paul B.                                                                                                                                                                        | Preventive endodontics by direct pulp capping with restorative dentin substitute-biodentine: A series of fifteen cases                                              | 2018 | Indian J Dent Res                                                              |
| Kranz A.M., Rozier R.G., Preisser J.S., Stearns S.C., Weinberger M., Lee J.Y.                                                                                                                         | Preventive Services by Medical and Dental Providers and Treatment Outcomes                                                                                          | 2014 | Journal of dental research                                                     |
| de Lima BR, Nicoloso GF, Fatturi-Parolo CC, Ferreira MBC, Montagner F, Casagrande L.                                                                                                                  | Prevotella strains and lactamic resistance gene distribution in different oral environments of children with pulp necrosis                                          | 2018 | Int Endod J                                                                    |
| Fatahzadeh M.                                                                                                                                                                                         | Primary diffuse large B-cell lymphoma of mandible masquerading as a toothache                                                                                       | 2020 | Quintessence International                                                     |
| Atasever G, Keceli TI, Uysal S, Gungor HC, Olmez S.                                                                                                                                                   | Primary molar pulpotomies with different hemorrhage control agents and base materials: A randomized clinical trial                                                  | 2019 | Niger J Clin Pract                                                             |
| Coll JA, Seale NS, Vargas K, Marghalani AA, Al Shamali S, Graham L.                                                                                                                                   | Primary Tooth Vital Pulp Therapy: A Systematic Review and Meta-analysis                                                                                             | 2017 | Pediatr Dent                                                                   |
| Cannon M.; Gerodias N.; Viera A.; Percinoto C.; Jurado R.                                                                                                                                             | Primate pulpal healing after exposure and TheraCal application                                                                                                      | 2014 | The Journal of clinical pediatric dentistry                                    |
| Nagashima K.; Miwa T.; Soumiya H.; Ushiro D.; Takeda-Kawaguchi T.; Tamaoki N.; Ishiguro S.; Sato Y.; Miyamoto K.; Ohno T.; Osawa M.; Kunisada T.; Shibata T.; Tezuka K.-I.; Furukawa S.; Fukumitsu H. | Priming with FGF2 stimulates human dental pulp cells to promote axonal regeneration and locomotor function recovery after spinal cord injury                        | 2017 | Scientific Reports                                                             |
| Pirani C.; Tinarelli V.; Gatto M.R.; Iacono F.; Gandolfi M.G.; Prati C.                                                                                                                               | Prognosis of root canal treatments filled with Therafil system: A 5-year retrospective study                                                                        | 2016 | Giornale Italiano di Endodonzia                                                |
| Kim C.H.; Bae J.S.; Kim I.-H.; Song J.S.; Choi H.-J.; Kang C.-M.                                                                                                                                      | Prognostic factors for the survival of primary molars following pulpotomy with mineral trioxide aggregate: a retrospective cohort study                             | 2021 | Clinical Oral Investigations                                                   |
| Dutra T.T.B.; Bezerra T.M.M.; Chaves F.N.; Feitosa S.G.; Costa F.W.G.; Pereira K.M.A.                                                                                                                 | Progressive ossificans fibrodysplasia endodontic management: Case report                                                                                            | 2019 | Special Care in Dentistry                                                      |
| Likitpongpiat N, Sangmaneeet S, Klanrit P, Noisombut R, Krisanaprakornkit S, Chailertvanitkul P.                                                                                                      | Promotion of Dental Pulp Wound Healing in New Zealand White Rabbits' Teeth by Thai Propolis Product                                                                 | 2019 | J Vet Dent                                                                     |
| Likitpongpiat N.; Sangmaneeet S.; Klanrit P.; Noisombut R.; Krisanaprakornkit S.; Chailertvanitkul P.                                                                                                 | Promotion of Dental Pulp Wound Healing in New Zealand White Rabbits' Teeth by Thai Propolis Product                                                                 | 2019 | Journal of Veterinary Dentistry                                                |
| Gandolfi M.G.; Siboni F.; Prati C.                                                                                                                                                                    | Properties of a novel polysiloxane-guttapercha calcium silicate-bioglass-containing root canal sealer                                                               | 2016 | Dental Materials                                                               |
| Patel V.; Gadiwalla Y.; Sassoon I.; Sproat C.; Kwok J.; McGurk M.                                                                                                                                     | Prophylactic use of pentoxifylline and tocopherol in patients who require dental extractions after radiotherapy for cancer of the head and neck                     | 2016 | British Journal of Oral and Maxillofacial Surgery                              |
| Petrini M.; Ferrante M.; Ciavarelli L.; Ceccarini A.; Brunetti L.; Vacca M.; Spoto G.                                                                                                                 | Prostaglandin E2 to diagnose between reversible and irreversible pulpitis                                                                                           | 2012 | International Journal of Immunopathology and Pharmacology                      |



|                                                                                                                                         |                                                                                                                                                                |      |                                                                                                                                                                                                   |
|-----------------------------------------------------------------------------------------------------------------------------------------|----------------------------------------------------------------------------------------------------------------------------------------------------------------|------|---------------------------------------------------------------------------------------------------------------------------------------------------------------------------------------------------|
| Ohkura N.; Shigetani Y.; Yoshida N.; Yoshida K.; Okiji T.                                                                               | Prostaglandin transporting protein-mediated prostaglandin E2 transport in lipopolysaccharide-inflamed rat dental pulp                                          | 2014 | Journal of Endodontics                                                                                                                                                                            |
| Braga V.S.; Kramer P.F.; Ceccato C.J.; Ferreira S.H.                                                                                    | Prosthetic Rehabilitation of a Patient with Severe Early Childhood Caries: A Case Report                                                                       | 2020 | Journal of Clinical and Diagnostic Research                                                                                                                                                       |
| Türp L., Kern M., Chaar M.S.                                                                                                            | Prosthetic restoration after atraumatic surgical extrusion: a report of two cases                                                                              | 2022 | Quintessence International                                                                                                                                                                        |
| Feng Q.; Sun X.; Ren Q.; Liu J.                                                                                                         | Protective effect of SIRT6 against LPS-induced human dental pulp cell apoptosis via regulating Ku70 deacetylation                                              | 2017 | International Journal of Clinical and Experimental Pathology                                                                                                                                      |
| Zhang L.; Bai L.; Ren Q.; Sun G.; Si Y.                                                                                                 | Protective effects of SIRT6 against lipopolysaccharide (LPS) are mediated by deacetylation of Ku70                                                             | 2018 | Molecular Immunology                                                                                                                                                                              |
| Silva P.A.O.; Lima S.M.F.; Freire M.S.; Murad A.M.; Franco O.L.; Rezende T.M.B.                                                         | Proteomic analysis of human dental pulp in different clinical diagnosis                                                                                        | 2021 | Clinical Oral Investigations                                                                                                                                                                      |
| Eckhardt A.; Jágr M.; Pataridis S.; Mikšik I.                                                                                           | Proteomic analysis of human tooth pulp: Proteomics of human tooth                                                                                              | 2014 | Journal of Endodontics                                                                                                                                                                            |
| Coll J, Seale NS, Vargas K, Chi DL, Marghalani AA, Graham L.                                                                            | Protocol for a Systematic Review and Meta-analysis of Vital Pulp Therapy for Children with Deep Caries in the Primary Dentition                                | 2015 | Pediatr Dent                                                                                                                                                                                      |
| Kumar R.A., Venkatesh B., Karumaran C.S., Rajasekaran M.S., Shankar P.                                                                  | Protocol for dental management in a patient with glucose-6-phosphate dehydrogenase deficiency                                                                  | 2017 | Journal of Clinical and Diagnostic Research                                                                                                                                                       |
| Sonoda S.; Yamaza H.; Yoshimaru K.; Taguchi T.; Yamaza T.                                                                               | Protocol to generate xenogeneic-free/serum-free human dental pulp stem cells                                                                                   | 2022 | STAR Protocols                                                                                                                                                                                    |
| Boderé PJ, Calberson F, De Bruyne M, De Moor R, Meire M.                                                                                | Protocols for cleaning the incisor access cavity contaminated with epoxy resin sealer                                                                          | 2022 | Eur J Oral Sci                                                                                                                                                                                    |
| St Paul A.; Phillips C.; Lee J.Y.; Khan A.A.                                                                                            | Provider Perceptions of Treatment Options for Immature Permanent Teeth                                                                                         | 2017 | Journal of Endodontics                                                                                                                                                                            |
| Hashim Nainar SM.                                                                                                                       | Provision of Pulp Therapy and Stainless Steel Crowns for Young Children by General Dentists                                                                    | 2016 | Pediatr Dent                                                                                                                                                                                      |
| Ramnarain P.; Singh S.                                                                                                                  | Public healthcare practitioners' knowledge, attitudes and practices related to oral antibiotic prescriptions for dental use in Pietermaritzburg, KwaZulu-Natal | 2022 | Health SA Gesondheid                                                                                                                                                                              |
| Ricucci D, Siqueira JF Jr, Loghin S, Lin LM.                                                                                            | Pulp and apical tissue response to deep caries in immature teeth: A histologic and histobacteriologic study                                                    | 2017 | J Dent                                                                                                                                                                                            |
| Ricucci D., Siqueira J.F., Rôças I.N., Lipski M., Shibani A., Tay F.R.                                                                  | Pulp and dentine responses to selective caries excavation: A histological and histobacteriological human study                                                 | 2020 | Journal of dentistry                                                                                                                                                                              |
| Chalmers N.I., Oh K., Hughes C.V., Pradhan N., Kanasi E., Ehrlich Y., Dewhirst F.E., Tanner A.C.R.                                      | Pulp and plaque microbiotas of children with severe early childhood caries                                                                                     | 2015 | Journal of Oral Microbiology                                                                                                                                                                      |
| Aaminabadi N.A.; Parto M.; Emamverdizadeh P.; Jamali Z.; Shirazi S.                                                                     | Pulp bleeding color is an indicator of clinical and histohematologic status of primary teeth                                                                   | 2017 | Clinical Oral Investigations                                                                                                                                                                      |
| de Sousa Reis M.; Scarparo R.K.; Signor B.; Bolzan J.T.; Steier L.; de Figueiredo J.A.P.                                                | Pulp capping with mineral trioxide aggregate or Biodentine: a comparison of mineralized barrier formation and inflammatory and degenerative events             | 2021 | Brazilian Oral Research                                                                                                                                                                           |
| Pedroza J.A.Y., Villasante R.A.Ñ., Kohatsu A.K.N., Gamboa M.M.R.N.                                                                      | Pulp capping: Calcium silicate-based cements. Report of a clinical case                                                                                        | 2020 | Revista Estomatologica Herediana                                                                                                                                                                  |
| Souron J.-B.; Petiet A.; Decup F.; Tran X.V.; Lesieur J.; Poliard A.; Le Guludec D.; Letourneur D.; Chaussain C.; Rouzet F.; Vital S.O. | Pulp cell tracking by radionuclide imaging for dental tissue engineering                                                                                       | 2014 | Tissue Engineering - Part C: Methods                                                                                                                                                              |
| Vilca Velazco M.F., Lavado García L., Torres Ramos G., López Ramos R.P.                                                                 | Pulp chamber access alternative in pulpectomies in a child with Wolff-Parkinson-White syndrome. A case report                                                  | 2022 | Special care in dentistry : official publication of the American Association of Hospital Dentists, the Academy of Dentistry for the Handicapped, and the American Society for Geriatric Dentistry |
| Frisk F.; Kvist T.; Axelsson S.; Bergenholtz G.; Davidson T.; Mejare I.; Norlund A.; Petersson A.; Sandberg H.; Tranæus S.; Hakeberg M. | Pulp exposures in adults - Choice of treatment among Swedish dentists                                                                                          | 2013 | Swedish Dental Journal                                                                                                                                                                            |

|                                                                                                                                      |                                                                                                                                                     |      |                                                              |
|--------------------------------------------------------------------------------------------------------------------------------------|-----------------------------------------------------------------------------------------------------------------------------------------------------|------|--------------------------------------------------------------|
| Murano H.; Kaneko T.; Zaw S.Y.M.; Sone P.P.; Zaw Z.C.T.; Okada Y.; Sunakawa M.; Katsube K.-I.; Okiji T.                              | Pulp inflammation induces Kv1.1 K+ channel down-regulation in rat thalamus                                                                          | 2022 | Oral Diseases                                                |
| Duncan H.F.; Cooper P.R.                                                                                                             | Pulp Innate Immune Defense: Translational Opportunities                                                                                             | 2020 | Journal of Endodontics                                       |
| Stafuzza TC, Vitor LLR, Lourenço Neto N, Rios D, Cruvinel T, Sakai VT, Moretti ABS, Machado MAAM, Oliveira TM.                       | Pulp liner materials in selective caries removal: study protocol for a randomised controlled trial                                                  | 2021 | BMJ Open                                                     |
| Martens L.; Rajasekharan S.; Cauwels R.                                                                                              | Pulp management after traumatic injuries with a tricalcium silicate-based cement (Biodentine™): a report of two cases, up to 48 months follow-up    | 2015 | European Archives of Paediatric Dentistry                    |
| Jabbar N.S.A.; Aldrigui J.M.; Braga M.M.; Wanderley M.T.                                                                             | Pulp polyp in traumatized primary teeth - A case-control study                                                                                      | 2013 | Dental Traumatology                                          |
| Wang G.; Wang C.; Qin M.                                                                                                             | Pulp prognosis following conservative pulp treatment in teeth with complicated crown fractures—A retrospective study                                | 2017 | Dental Traumatology                                          |
| Itoh Y.; Sasaki J.I.; Hashimoto M.; Katata C.; Hayashi M.; Imazato S.                                                                | Pulp Regeneration by 3-dimensional Dental Pulp Stem Cell Constructs                                                                                 | 2018 | Journal of Dental Research                                   |
| Nakashima M.; Iohara K.; Murakami M.; Nakamura H.; Sato Y.; Arijji Y.; Matsushita K.                                                 | Pulp regeneration by transplantation of dental pulp stem cells in pulpitis: a pilot clinical study                                                  | 2017 | Stem Cell Research and Therapy                               |
| Jang J.-H.; Moon J.-H.; Kim S.G.; Kim S.-Y.                                                                                          | Pulp regeneration with hemostatic matrices as a scaffold in an immature tooth minipig model                                                         | 2020 | Scientific Reports                                           |
| Nakashima M.; Iohara K.; Zayed M.                                                                                                    | Pulp Regeneration: Current Approaches, Challenges, and Novel Rejuvenating Strategies for an Aging Population                                        | 2020 | Journal of Endodontics                                       |
| Nakashima M.; Fukuyama F.; Iohara K.                                                                                                 | Pulp Regenerative Cell Therapy for Mature Molars: A Report of 2 Cases                                                                               | 2022 | Journal of Endodontics                                       |
| Machado M.A.A.M., Stafuzza T.C., Vitor L.L.R., da Costa S.A., da Costa S.M., Neto N.L., Oliveira T.M.                                | Pulp repair response after the use of a dentin-pulp biostimulation membrane (BBio) in primary teeth: study protocol for a randomized clinical trial | 2020 | Trials                                                       |
| de Oliveira Gallinari M.; Ângelo Cintra L.T.; Benetti F.; Rahal V.; Ervolino E.; Fraga Briso A.L.                                    | Pulp response of rats submitted to bleaching and the use of different anti-inflammatory drugs                                                       | 2019 | PLoS ONE                                                     |
| Ricucci D.; Siqueira J.F., Jr.; Rôças I.N.                                                                                           | Pulp Response to Periodontal Disease: Novel Observations Help Clarify the Processes of Tissue Breakdown and Infection                               | 2021 | Journal of Endodontics                                       |
| Dimitrova-Nakov S.; Baudry A.; Harichane Y.; Kellermann O.; Goldberg M.                                                              | Pulp stem cells: Implication in reparative dentin formation                                                                                         | 2014 | Journal of Endodontics                                       |
| Sato T, Matsuyama Y, Fujiwara T, Tagami J.                                                                                           | Pulp survival after composite resin restoration of caries lesions in adults                                                                         | 2020 | J Oral Sci                                                   |
| Shivanni S.S.; Bhagya Lakshmi T.; Balakrishna R.N.                                                                                   | Pulp therapies in young permanent maxillary molar with class I caries                                                                               | 2019 | International Journal of Dentistry and Oral Science          |
| Shah A.; Peacock R.; Eliyas S.                                                                                                       | Pulp therapy and root canal treatment techniques in immature permanent teeth: an update                                                             | 2022 | British Dental Journal                                       |
|                                                                                                                                      | Pulp therapy for primary and immature permanent teeth                                                                                               | 2018 | Pediatric Dentistry                                          |
| Kratunova E, Silva D.                                                                                                                | Pulp therapy for primary and immature permanent teeth: an overview                                                                                  | 2018 | Gen Dent                                                     |
| Marques N.; Lourenço Neto N.; Fernandes A.P.; Rodini C.; Hungaro Duarte M.; Rios D.; Machado M.A.; Oliveira T.                       | Pulp tissue response to Portland cement associated with different radio pacifying agents on pulpotomy of human primary molars                       | 2015 | Journal of Microscopy                                        |
| Smaïl-Faugeron V, Courson F, Durieux P, Muller-Bolla M, Glenney AM, Fron Chabouis H.                                                 | Pulp treatment for extensive decay in primary teeth                                                                                                 | 2014 | Cochrane Database Syst Rev                                   |
| Han G.; Hu M.; Zhang Y.; Jiang H.                                                                                                    | Pulp vitality and histologic changes in human dental pulp after the application of moderate and severe intrusive orthodontic forces                 | 2013 | American Journal of Orthodontics and Dentofacial Orthopedics |
| Pereira J.T., Knorst J.K., Ardenghi T.M., Piva F., Imperato J.C.P., Olegário I.C., Hermoza R.A.M., Armas-Vega A.D.C., de Araujo F.B. | Pulp Vitality and Longevity of Adhesive Restorations Are Not Affected by Selective Carious Removal: A Multicenter Clinical Trial                    | 2021 | Caries research                                              |

|                                                                                                                                                                                                                                                                                                                                                                                                                                                                           |                                                                                                                                                                  |      |                                                              |
|---------------------------------------------------------------------------------------------------------------------------------------------------------------------------------------------------------------------------------------------------------------------------------------------------------------------------------------------------------------------------------------------------------------------------------------------------------------------------|------------------------------------------------------------------------------------------------------------------------------------------------------------------|------|--------------------------------------------------------------|
| Hatrom AA, Howait MS, Zawawi KH, Al-Turki GA, Alansari RA, Almehayawi NF, Alammari SH, Mohammed RA, Hassan AH.                                                                                                                                                                                                                                                                                                                                                            | Pulp volume changes after piezocision-assisted tooth movement: a randomized clinical trial                                                                       | 2021 | BMC Oral Health                                              |
| Hamre H.J.; Mittag I.; Glockmann A.; Kiene H.; Tröger W.                                                                                                                                                                                                                                                                                                                                                                                                                  | Pulpa dentis D30 for acute reversible pulpitis: A prospective cohort study in routine dental practice                                                            | 2012 | Alternative Therapies in Health and Medicine                 |
| Chompu-Inwai P, Bua-On P, Nirunsittirat A, Chuveera P, Louwakul P, Sastraruji T.                                                                                                                                                                                                                                                                                                                                                                                          | Pulpal anesthesia in pediatric patients following supplemental mandibular buccal infiltration in vital permanent mandibular molars with deep caries              | 2020 | Clin Oral Investig                                           |
| Kiho K.; Sumitomo S.; Tanaka M.; Hasegawa T.; Sakai C.; Takitani Y.; Yoshida T.; Kawano S.                                                                                                                                                                                                                                                                                                                                                                                | Pulpal Disease Arising from Medication-related Osteonecrosis of the Jaw: A Case Report                                                                           | 2020 | Journal of Endodontics                                       |
| Walia T., Alzayer W.F.A., Nemer M.N.A.A.                                                                                                                                                                                                                                                                                                                                                                                                                                  | Pulpal dressing condensation methods in pulpotomy for primary molars: An in-vitro comparative study                                                              | 2021 | Saudi Dental Journal                                         |
| Swarup S.; Rao A.; Boaz K.; Srikant N.; Shenoy R.                                                                                                                                                                                                                                                                                                                                                                                                                         | Pulpal response to nano hydroxyapatite, mineral trioxide aggregate and calcium hydroxide when used as a direct pulp capping agent: An in vivo study              | 2014 | Journal of Clinical Pediatric Dentistry                      |
| He Y.; Gan Y.; Lu J.; Feng Q.; Wang H.; Guan H.; Jiang Q.                                                                                                                                                                                                                                                                                                                                                                                                                 | Pulpal Tissue Inflammatory Reactions after Experimental Pulpal Exposure in Mice                                                                                  | 2017 | Journal of Endodontics                                       |
| Lim W.Y.; Madden L.E.; Becker D.L.                                                                                                                                                                                                                                                                                                                                                                                                                                        | Pulpal upregulation of connexin 43 during pulpitis                                                                                                               | 2021 | Clinical Oral Investigations                                 |
| Bhatnagar NB, Mantri SP, Dube KA, Jaiswal NU, Singh VJ.                                                                                                                                                                                                                                                                                                                                                                                                                   | Pulpal-anesthesia of a mandibular first molar with irreversible pulpitis by inferior alveolar nerve block plus buccal infiltration using articaine or lignocaine | 2020 | J Conserv Dent                                               |
| Peycheva K.                                                                                                                                                                                                                                                                                                                                                                                                                                                               | Pulp-capping with mineral trioxide aggregate                                                                                                                     | 2015 | Acta Medica Bulgarica                                        |
| Rasidi M.Q.Z.B.M., Bhagya Lakshmi T., Prabu D.                                                                                                                                                                                                                                                                                                                                                                                                                            | Pulpectomy in maxillary first molars with distal caries                                                                                                          | 2020 | International Journal of Research in Pharmaceutical Sciences |
| Teja K.V.; Ramesh S.                                                                                                                                                                                                                                                                                                                                                                                                                                                      | Pulpotomy as an alternative to root canal treatment in mature permanent teeth with closed apex: A review                                                         | 2020 | Biomedicine (India)                                          |
| Li Y, Sui B, Dahl C, Bergeron B, Shipman P, Niu L, Chen J, Tay FR.                                                                                                                                                                                                                                                                                                                                                                                                        | Pulpotomy for carious pulp exposures in permanent teeth: A systematic review and meta-analysis                                                                   | 2019 | J Dent                                                       |
| Hamilton A., Clarkson J.E., Ramsay C.R., Mannocci F., Jarad F., Albadri S., Ricketts D., Tait C., Banerjee A., Deery C., Boyers D., Marshman Z., Goulao B., Hamilton A.R., Banister K., Bell R., Brown L., Conway D.I., Donaldson P., Duncan A., Dunn K., Fee P., Forrest M., Glenny A.-M., Gouick J., Gupta E., Jacobsen E., Kettle J., MacLennan G., Macpherson L., McGuff T., Mitchell F., van der Pol M., Moazzez R., Roberston D., Wojewodka G., Young L., Lamont T. | Pulpotomy for the Management of Irreversible Pulpitis in Mature Teeth (PIP): a feasibility study                                                                 | 2022 | Pilot and Feasibility Studies                                |
| Ngoc V.T.N.; Van Nga T.D.; Chu D.-T.; Anh L.Q.                                                                                                                                                                                                                                                                                                                                                                                                                            | Pulpotomy management using laser diode in pediatric patient with severe hemophilia A under general anesthesia—A case report                                      | 2018 | Special Care in Dentistry                                    |
| Howley B, Seale NS, McWhorter AG, Kerins C, Boozer KB, Lindsey D.                                                                                                                                                                                                                                                                                                                                                                                                         | Pulpotomy versus pulpectomy for carious vital primary incisors: randomized controlled trial                                                                      | 2012 | Pediatr Dent                                                 |
| Gadallah L, Hamdy M, El Bardissy A, Abou El Yazeed M.                                                                                                                                                                                                                                                                                                                                                                                                                     | Pulpotomy versus pulpectomy in the treatment of vital pulp exposure in primary incisors. A systematic review and meta-analysis                                   | 2018 | F1000Res                                                     |
| Prabhakar A.R.; Mandrolí P.; Bhat K.                                                                                                                                                                                                                                                                                                                                                                                                                                      | Pulpotomy with curcumin: Histological comparison with mineral trioxide aggregate in rats                                                                         | 2019 | Indian Journal of Dental Research                            |
| Vu T.T., Nguyen M.T., Sangvanich P., Thunyakitpisal P.                                                                                                                                                                                                                                                                                                                                                                                                                    | Pulse Oximetry and Three-Dimensional Analysis in Evaluating Immature Permanent Teeth Apexogenesis: Two Case Reports                                              | 2022 | Open Dentistry Journal                                       |
| Caldeira C.L.; Barletta F.B.; Ilha M.C.; Abrão C.V.; Gavini G.                                                                                                                                                                                                                                                                                                                                                                                                            | Pulse oximetry: a useful test for evaluating pulp vitality in traumatized teeth                                                                                  | 2016 | Dental Traumatology                                          |
| Hamdy M., Elgendi H., Sharaan M.                                                                                                                                                                                                                                                                                                                                                                                                                                          | Push-Out Bond Strength and Dentinal Penetration of a Novel Herbal-Based Pulp Capping Agent: An In vitro Study                                                    | 2022 | Open Access Macedonian Journal of Medical Sciences           |

|                                                                                                                |                                                                                                                                                                                                      |      |                                                              |
|----------------------------------------------------------------------------------------------------------------|------------------------------------------------------------------------------------------------------------------------------------------------------------------------------------------------------|------|--------------------------------------------------------------|
| Silva E.J.N.L.; Carvalho N.K.; Prado M.C.; Zanon M.; Senna P.M.; Souza E.M.; De-Deus G.                        | Push-out Bond Strength of Injectable Pozzolan-based Root Canal Sealer                                                                                                                                | 2016 | Journal of Endodontics                                       |
| Bullard S, Mona M, Pereira AC, Kajfasz J, Lemos JA, Abranches J, Wallet SM, Pileggi R.                         | Quantitative Analysis of Biofilm Removal Following Instrumentation with TRUShape and Vortex Blue File Systems: Microbiological Study                                                                 | 2022 | Front Biosci (Schol Ed)                                      |
| Carneiro ALE, Spin-Neto R, Zambrana NRM, Zambrana JRM, de Andrade Salgado DMR, Costa C.                        | Quantitative and qualitative comparisons of pulp cavity volumes produced by cone beam computed tomography and micro-computed tomography through semiautomatic segmentation: An ex vivo investigation | 2023 | Oral Surg Oral Med Oral Pathol Oral Radiol                   |
| Ong T.K.; Lim G.S.; Singh M.; Fial A.V.                                                                        | Quantitative Assessment of Root Development after Regenerative Endodontic Therapy: A Systematic Review and Meta-Analysis                                                                             | 2020 | Journal of Endodontics                                       |
| Priyadharshini S.; Mahesh                                                                                      | RADIOGRAPHIC ANALYSIS OF ROOT CANAL TREATMENT DONE BY POSTGRADUATE STUDENTS IN AN UNIVERSITY DENTAL HOSPITAL                                                                                         | 2022 | European Chemical Bulletin                                   |
| Moreira S.D.A.; Nunes J.B.; Colombo F.A.; Fonseca N.D.S.M.; Viola N.V.                                         | Radiographic and antimicrobial evaluation of enterococcus Faecalis and Actinomyces Israelii micro-organisms after photodynamic therapy (aPDT)                                                        | 2021 | Photodiagnosis and Photodynamic Therapy                      |
| Siva Kumar M., Hari Kumar M., Vishalakshi K., Sabitha H.                                                       | Radiographic assessment of bone formation using rhBMP2 at maxillary periapical surgical defects: A case series                                                                                       | 2016 | Journal of Clinical and Diagnostic Research                  |
| Alfouzian K., Baskaradoss J.K., Geevarghese A., Alzahrani M., Alhezaimi K.                                     | Radiographic Diagnosis of Periapical Status and Quality of Root Canal Fillings in a Saudi Arabian Subpopulation                                                                                      | 2016 | Oral health & preventive dentistry                           |
| Kiran N.K., Chowdhary N., Kumar M., Pavana M.P., Sridhara A.                                                   | Radiographic evaluation of different combinations of zinc oxide as an obturating material in pulpectomy: A comparative in vivo study                                                                 | 2020 | Indian Journal of Public Health Research and Development     |
| Wu J.; Li X.; Xu L.; Tang Z.; Zhao J.; Xiang Y.; Zhang Y.; Yang J.; Ye L.                                      | Radiographic evaluation of immature traumatized incisors following different endodontic treatments                                                                                                   | 2021 | Dental Traumatology                                          |
| Bane K.; Charpentier E.; Bronnec F.; Descroix V.; Gaye-N'Diaye F.; Kane A.W.; Toledo R.; Machtou P.; Azérad J. | Randomized Clinical Trial of Intraosseous Methylprednisolone Injection for Acute Pulpitis Pain                                                                                                       | 2016 | Journal of Endodontics                                       |
| Franzon R, Opdam NJ, Guimarães LF, Demarco FF, Casagrande L, Haas AN, Araujo FB.                               | Randomized controlled clinical trial of the 24-months survival of composite resin restorations after one-step incomplete and complete excavation on primary teeth                                    | 2015 | J Dent                                                       |
| Ghoul-Mazgar S.                                                                                                | RANK, RANKL and OPG expressions in a permanent molar with a replacement resorption                                                                                                                   | 2013 | Odontology                                                   |
| Tan K.S.; Yu V.S.H.; Quah S.Y.; Bergenholtz G.                                                                 | Rapid method for the detection of root canal bacteria in endodontic therapy                                                                                                                          | 2015 | Journal of Endodontics                                       |
| Rajasekaran S.; Rao S.S.; Dalavi P.A.; Prabhu A.; Anil S.; Venkatesan J.; Bhat S.S.                            | Rapid microwave-assisted biosynthesis of chitooligosaccharide coated silver nanoparticles: Assessments of antimicrobial activity for paediatric pulp therapy                                         | 2021 | Advances in Natural Sciences: Nanoscience and Nanotechnology |
| Sothornwit J.; Charoensri S.; Pongchaiyakul C.                                                                 | Rapid onset of osteonecrosis of the jaw in an osteoporosis patient treated with denosumab: A case report                                                                                             | 2020 | Journal of the Medical Association of Thailand               |
| Patil PB, Chaudhari SG, Goel A, Agarwal P.                                                                     | Rare association of dens invaginatus with impacted mesiodens - A case report                                                                                                                         | 2012 | J Oral Biol Craniofac Res                                    |
| Sato T.; Suenaga H.; Igarashi M.; Hoshi K.; Takato T.                                                          | Rare case of external dental fistula of the submental region misdiagnosed as inverted follicular keratosis and thyroglossal duct cyst                                                                | 2015 | International Journal of Surgery Case Reports                |
| Ring J.; Ring K.C.                                                                                             | Rare Root Canal Configuration of Mandibular Second Premolar Using Cone-beam Computed Tomographic Scanning                                                                                            | 2017 | Journal of Endodontics                                       |
| Monea M.; Moldovan C.                                                                                          | Rare root morphology of a maxillary central incisor associated with gingival hyperplasia an endodontic case report                                                                                   | 2016 | Medicine (United States)                                     |
| Koyuncuoglu C.Z.; Aydin M.; Kirmizi N.I.; Aydin V.; Aksoy M.; Isli F.; Akici A.                                | Rational use of medicine in dentistry: do dentists prescribe antibiotics in appropriate indications?                                                                                                 | 2017 | European Journal of Clinical Pharmacology                    |
| Ribeiro CC, de Oliveira Lula EC, da Costa RC, Nunes AM.                                                        | Rationale for the partial removal of carious tissue in primary teeth                                                                                                                                 | 2012 | Pediatr Dent                                                 |
| Krechina EK, Volkov AV, Abdurakhmanova ZU.                                                                     | Rationale for the use of bioactive cements by in vitro simulation of accidental pulp opening                                                                                                         | 2021 | Stomatologiya (Mosk)                                         |

|                                                                                                                             |                                                                                                                                                                              |      |                                                                                                                                         |
|-----------------------------------------------------------------------------------------------------------------------------|------------------------------------------------------------------------------------------------------------------------------------------------------------------------------|------|-----------------------------------------------------------------------------------------------------------------------------------------|
| Sabino C.P.; Garcez A.S.; Núñez S.C.; Ribeiro M.S.; Hamblin M.R.                                                            | Real-time evaluation of two light delivery systems for photodynamic disinfection of Candida albicans biofilm in curved root canals                                           | 2015 | Lasers in Medical Science                                                                                                               |
| Kamalova M.K., Fomenko I.V., Dmitrienko D.S., Matvienko N.V., Arjenovskaya E.N., Gevorkyan A.G., Nikitina K.V., Maslak E.E. | Reasons for 1-17-year-old children to visit A dentist during the covid-19 pandemic                                                                                           | 2020 | European Journal of Molecular and Clinical Medicine                                                                                     |
| Hsu U, Hui BK, Pourat N.                                                                                                    | Recall compliance and incidence of dental caries among underserved children                                                                                                  | 2015 | J Calif Dent Assoc                                                                                                                      |
| Saber AM, El Meligy OA, Alaki SM.                                                                                           | Recent Advances in Indirect Pulp Treatment Materials for Primary Teeth: A Literature Review                                                                                  | 2021 | Int J Clin Pediatr Dent                                                                                                                 |
| Nakashima M.; Iohara K.                                                                                                     | Recent Progress in Translation from Bench to a Pilot Clinical Study on Total Pulp Regeneration                                                                               | 2017 | Journal of Endodontics                                                                                                                  |
| Daher A, Abreu MH, Costa LR.                                                                                                | Recognizing preschool children with primary teeth needing dental treatment because of caries-related toothache                                                               | 2015 | Community Dent Oral Epidemiol                                                                                                           |
| Al-Khanati NM, Kara Beit Z.                                                                                                 | Reconsidering some standards in immediate autotransplantation of teeth: Case report with 2-year follow-up                                                                    | 2022 | Ann Med Surg (Lond)                                                                                                                     |
| Zareiyani M., Molaasadolah F., Haghgoo R., Ahmadi R., Kahvand M.                                                            | Reconstruction of pulpotomized primary molar and retention of stainless-steel crowns: An in-vitro study                                                                      | 2020 | Open Dentistry Journal                                                                                                                  |
| Farhin K., Viral P.M., Thejokrishna P., Sajjad M.                                                                           | Reduction in Bacterial Loading Using MTAD as an Irrigant in Pulpotomized Primary Teeth                                                                                       | 2015 | The Journal of clinical pediatric dentistry                                                                                             |
| Duan W, Chen Y, Zhang Q, Lin X, Yang X.                                                                                     | Refined tooth and pulp segmentation using U-Net in CBCT image                                                                                                                | 2021 | Dentomaxillofac Radiol                                                                                                                  |
| Al-Asmar A.A., Al-Hiyasat A.S., Abu-Awwad M., Mousa H.N., Salim N.A., Almadani W., Rihan F., Sawair F.A., Pitts N.B.        | Reframing Perceptions in Restorative Dentistry: Evidence-Based Dentistry and Clinical Decision-Making                                                                        | 2021 | International Journal of Dentistry                                                                                                      |
| Saoud T.M.A.; Ricucci D.; Lin L.M.; Gaengler P.                                                                             | Regeneration and repair in endodontics-a special issue of the regenerative endodontics-a new era in clinical endodontics                                                     | 2016 | Dentistry Journal                                                                                                                       |
| Roshene R.                                                                                                                  | Regeneration of dental pulp- A review                                                                                                                                        | 2015 | Journal of Pharmaceutical Sciences and Research                                                                                         |
| Ling L.; Zhao Y.M.; Wang X.T.; Wen Q.; Ge L.H.                                                                              | Regeneration of Dental Pulp Tissue by Autologous Grafting Stem Cells Derived from Inflammatory Dental Pulp Tissue in Immature Premolars in a Beagle Dog                      | 2020 | The Chinese journal of dental research : the official journal of the Scientific Section of the Chinese Stomatological Association (CSA) |
| Na S.; Zhang H.; Huang F.; Wang W.; Ding Y.; Li D.; Jin Y.                                                                  | Regeneration of dental pulp/dentine complex with a three-dimensional and scaffold-free stem-cell sheet-derived pellet                                                        | 2016 | Journal of Tissue Engineering and Regenerative Medicine                                                                                 |
| Sabeti M.; Golchert K.; Torabinejad M.                                                                                      | Regeneration of Pulp-Dentin Complex in a Tooth with Symptomatic Irreversible Pulpitis and Open Apex Using Regenerative Endodontic Procedures                                 | 2021 | Journal of Endodontics                                                                                                                  |
| Chen H.; Fu H.; Wu X.; Duan Y.; Zhang S.; Hu H.; Liao Y.; Wang T.; Yang Y.; Chen G.; Li Z.; Tian W.                         | Regeneration of pulpo-dentinal-like complex by a group of unique multipotent CD24a+ stem cells                                                                               | 2020 | Science Advances                                                                                                                        |
| Al-Hezaimi K.; Naghshbandi J.; Alhuzaimi R.; Alonaizan F.; AlQwizany I.; Rotstein I.                                        | Regeneration of secondary dentin using recombinant human platelet-derived growth factor and MTA for pulp capping: A randomized controlled human clinical trial               | 2020 | International Journal of Periodontics and Restorative Dentistry                                                                         |
| Lu J.; Kahler B.                                                                                                            | Regenerative endodontic procedures for two traumatized mature anterior teeth with transverse root fractures                                                                  | 2022 | BMC Oral Health                                                                                                                         |
| Tong H.J.; Sim Y.F.; Berdouses E.; Al-Jundi S.; El Shahawy O.; Nazzal H.                                                    | Regenerative endodontic therapy (RET) for managing immature non-vital teeth: experiences and opinions of paediatric dental practitioners in the European and Arabian regions | 2021 | European Archives of Paediatric Dentistry                                                                                               |
| Topçuoğlu G.; Topçuoğlu H.S.                                                                                                | Regenerative Endodontic Therapy in a Single Visit Using Platelet-rich Plasma and Biodentine in Necrotic and Asymptomatic Immature Molar Teeth: A Report of 3 Cases           | 2016 | Journal of Endodontics                                                                                                                  |
| Kim S.G.; Solomon C.S.                                                                                                      | Regenerative Endodontic Therapy in Mature Teeth Using Human-Derived Composite Amnion-Chorion Membrane as a Bioactive Scaffold: A Pilot Animal Investigation                  | 2021 | Journal of Endodontics                                                                                                                  |
| Tzanetakis G.N.; Giannakoulas D.G.; Papanakou S.; Gizani S.; Lygidakis N.                                                   | Regenerative endodontic therapy of immature permanent molars with pulp necrosis: a cases series and a literature review                                                      | 2021 | European Archives of Paediatric Dentistry                                                                                               |

|                                                                                                                       |                                                                                                                                                                         |      |                                                         |
|-----------------------------------------------------------------------------------------------------------------------|-------------------------------------------------------------------------------------------------------------------------------------------------------------------------|------|---------------------------------------------------------|
| Pace R.; Giuliani V.; Di Nasso L.; Pagavino G.; Franceschi D.; Franchi L.                                             | Regenerative Endodontic Therapy using a New Antibacterial Root Canal Cleanser in necrotic immature permanent teeth: Report of two cases treated in a single appointment | 2021 | Clinical Case Reports                                   |
| Çalışkan M.K.; Demirci G.K.; Güneri P.                                                                                | Regenerative endodontic therapy with platelet rich fibrin: Case series                                                                                                  | 2020 | Journal of Clinical Pediatric Dentistry                 |
| Elfrink M.E.C.; Heijdra J.S.C.; Krikken J.B.; Kouwenberg-Bruring W.H.; Kouwenberg H.; Weerheijm K.L.; Veerkamp J.S.J. | Regenerative endodontic therapy: a follow-up of 47 anterior traumatised teeth                                                                                           | 2021 | European Archives of Paediatric Dentistry               |
| Al-Haddad A.Y.; Al-Namnam N.M.                                                                                        | Regenerative endodontic treatment in mature teeth: a systematic review and meta-analysis                                                                                | 2022 | Giornale Italiano di Endodonzia                         |
| Paryani K.; Kim S.G.                                                                                                  | Regenerative endodontic treatment of permanent teeth after completion of root development: A report of 2 cases                                                          | 2013 | Journal of Endodontics                                  |
| Natera M.; Mukherjee P.M.                                                                                             | Regenerative Endodontic Treatment with Orthodontic Treatment in a Tooth with Dens Evaginatus: A Case Report with a 4-year Follow-up                                     | 2018 | Journal of Endodontics                                  |
| Diogenes A.; Ruparel N.B.; Shiloah Y.; Hargreaves K.M.                                                                | Regenerative endodontics A way forward                                                                                                                                  | 2016 | Journal of the American Dental Association              |
| He L.; Kim S.G.; Gong Q.; Zhong J.; Wang S.; Zhou X.; Ye L.; Ling J.; Mao J.J.                                        | Regenerative Endodontics for Adult Patients                                                                                                                             | 2017 | Journal of Endodontics                                  |
| Ambu E.; Caruso S.; Gatto R.; Tecco S.; Severino M.                                                                   | Regenerative endodontics procedure of an immature permanent mandibular molar with a necrotic pulp using biodentine: A 16 months radiographic follow-up                  | 2020 | Journal of Biological Regulators and Homeostatic Agents |
| Rojas-Gutiérrez W.J.; Pineda-Vélez E.; Agudelo-Suárez A.A.                                                            | Regenerative Endodontics Success Factors and their Overall Effectiveness: An Umbrella Review                                                                            | 2022 | Iranian Endodontic Journal                              |
| Tabatabayi M.H.; Tavakoli A.; Ameghani B.A.                                                                           | Regenerative property of PRF used as capping material in pulpotomy in dogs                                                                                              | 2017 | Biomedical Research (India)                             |
| Yuan F, Zheng J, Sun Y, Wang Y, Lyu P.                                                                                | Regulation and Measurement of the Heat Generated by Automatic Tooth Preparation in a Confined Space                                                                     | 2017 | Photomed Laser Surg                                     |
| Chang M.-C.; Lin L.-D.; Zwei-Ching Chang J.; Huang C.-F.; Chuang F.-H.; Lee J.-J.; Jeng P.-Y.; Wang T.-M.; Jeng J.-H. | Regulation of vascular cell adhesion molecule-1 in dental pulp cells by interleukin-1 $\beta$ : The role of prostanoids                                                 | 2012 | Journal of Endodontics                                  |
| Sun C, Xie Y, Hu X, Fu J, Zhou J, Wu L.                                                                               | Relationship between Clinical Symptoms and the Microbiota in Advanced Caries                                                                                            | 2020 | J Endod                                                 |
| Duruk G, Laloglu E.                                                                                                   | Relationship Between Dental Caries and YKL-40 Levels in Saliva                                                                                                          | 2022 | J Clin Pediatr Dent                                     |
| Ashwatha Pratha A.; Jayalakshmi S.                                                                                    | Relationship between diabetes mellitus and pulpal infection & periapical diseases                                                                                       | 2016 | Journal of Pharmaceutical Sciences and Research         |
| Pei J, Liu J, Chen Y, Liu Y, Liao X, Pan J.                                                                           | Relationship between maxillary posterior molar roots and the maxillary sinus floor: Cone-beam computed tomography analysis of a western Chinese population              | 2020 | J Int Med Res                                           |
| Khairani A.; Fauziah E.; Budiardjo S.B.                                                                               | Relationship between oral health-related quality of life and salivary cortisol levels in children with caries                                                           | 2017 | International Journal of Applied Pharmaceutics          |
| Zhang W.; Dai Y.-B.; Wan P.-C.; Xu D.-D.; Guo Y.; Li Z.                                                               | Relationship between post-extraction pain and acute pulpitis: a randomised trial using third molars                                                                     | 2016 | International Dental Journal                            |
| Sui H, Lv Y, Xiao M, Zhou L, Qiao F, Zheng J, Sun C, Fu J, Chen Y, Liu Y, Zhou J, Wu L.                               | Relationship between the difference in electric pulp test values and the diagnostic type of pulpitis                                                                    | 2021 | BMC Oral Health                                         |
| Alomari Q.D.; Khalaf M.E.; Al-Shawaf N.M.                                                                             | Relative contribution of restorative treatment to tooth extraction in a teaching institution                                                                            | 2013 | Journal of Oral Rehabilitation                          |
| Boutsiouki C, Frankenberger R, Krämer N.                                                                              | Relative effectiveness of direct and indirect pulp capping in the primary dentition                                                                                     | 2018 | Eur Arch Paediatr Dent                                  |
| Ha W.N.; Chaves G.S.; Decurcio D.; Estrela C.; Peters O.A.; Rossi-Fedele G.                                           | Remaining dentinal thickness after simulated post space preparation and the fit of prefabricated posts to root canal preparation shapes                                 | 2021 | Journal of the American Dental Association              |
| Schwendicke F.                                                                                                        | Removing Carious Tissue: Why and How?                                                                                                                                   | 2018 | Monogr Oral Sci                                         |
| Gnanasegaran N.; Govindasamy V.; Musa S.; Abu Kasim N.H.                                                              | ReNCell VM conditioned medium enhances the induction of dental pulp stem cells into dopaminergic like cells                                                             | 2016 | Cytotechnology                                          |
| Li F.-C.; Hung W.-C.                                                                                                  | Repair of a perforating internal resorption: two case reports                                                                                                           | 2016 | Journal of Dental Sciences                              |
| Herrera D.R.; Herrera C.M.; Lima A.R.; Nagata J.Y.; Pereira A.C.; Silva E.J.; Soares A.J.; Gomes B.P.                 | Repair of apical root resorption associated with periodontitis using a new intracanal medicament protocol                                                               | 2014 | Journal of Oral Science                                 |

|                                                                                                                                     |                                                                                                                                                                                     |      |                                                              |
|-------------------------------------------------------------------------------------------------------------------------------------|-------------------------------------------------------------------------------------------------------------------------------------------------------------------------------------|------|--------------------------------------------------------------|
| Wen B.; Huang Y.; Qiu T.; Huo F.; Xie L.; Liao L.; Tian W.; Guo W.                                                                  | Reparative Dentin Formation by Dentin Matrix Proteins and Small Extracellular Vesicles                                                                                              | 2021 | Journal of Endodontics                                       |
| Abdelaz P.; El Zoghbi A.; Shokry M.; Ahmed A.-Z.; Rasha H.                                                                          | Reparative dentin formation using stem cell therapy versus calcium hydroxide in direct pulp capping: An animal study                                                                | 2019 | Brazilian Dental Journal                                     |
| Tran X.V.; Salehi H.; Truong M.T.; Sandra M.; Sadoine J.; Jacquot B.; Cuisinier F.; Chaussain C.; Boukpepsi T.                      | Reparative mineralized tissue characterization after direct pulp capping with calcium-silicate-based cements                                                                        | 2019 | Materials                                                    |
| Jayaraman J, Dhar V, Donly KJ, Priya E, Raggio DP, Childers NK, Wright TJ, Nagendrababu V, Clarke M, King N, Clarkson J, Innes NPT. | Reporting stAndards for research in PedIatric Dentistry (RAPID): an expert consensus-based statement                                                                                | 2021 | BMC Oral Health                                              |
| Obadiah I., Gurunathan D., Ravindran V.                                                                                             | Requirements of back to back crowns in 2 to 6 year old children in maxillary arch - an observational study                                                                          | 2020 | European Journal of Molecular and Clinical Medicine          |
| Obadiah I.; Gurunathan D.; Ravindran V.                                                                                             | Requirements of back to back crowns in children aged 2 to 6 years in mandibular arch-an observational study                                                                         | 2020 | International Journal of Research in Pharmaceutical Sciences |
| Luo YX, Sun ML, Shi PL, Liu P, Chen YY, Peng X.                                                                                     | Research progress in the relationship between Veillonella and oral diseases                                                                                                         | 2020 | Hua Xi Kou Qiang Yi Xue Za Zhi                               |
| Chen JQ, Dong YM.                                                                                                                   | Research progress in vital pulp therapy in mature permanent teeth with carious pulp exposure                                                                                        | 2022 | Zhonghua Kou Qiang Yi Xue Za Zhi                             |
| Chu G, Zhang ZY, Zhou H, Yan CX, Chen T, Guo YC.                                                                                    | Research Progress of Age Estimation Based on Age-related Changes of Dentin-pulp Complex                                                                                             | 2018 | Fa Yi Xue Za Zhi                                             |
| de Castro Kruly P.; Alenezi H.E.H.M.; Manogue M.; Devine D.A.; Dame-Teixeira N.; Garcia F.C.P.; Do T.                               | Residual Bacteriome after Chemomechanical Preparation of Root Canals in Primary and Secondary Infections                                                                            | 2022 | Journal of Endodontics                                       |
| Farahi F., Saberi E., Bijari S.                                                                                                     | Residual dentin thickness at the apical third of mandibular first molar mesial root instrumented by nickel-titanium rotary and manual files with different tapers: an ex vivo study | 2022 | Giornale Italiano di Endodonzia                              |
| Bezzon OL, Rivera DS, Silva RA, Oliveira DS, Silva-Herzog D, Nelson-Filho P, Lucisano MP, Silva LA.                                 | Resin luting materials: Tissue response in dog's teeth                                                                                                                              | 2015 | Microsc Res Tech                                             |
| Cardoso F.G.R.; Valera M.C.; Khoury R.D.; Martinho F.C.                                                                             | Resolution of Nasal Sinus Tract after Endodontic Therapy: A Case Report with Microbial Analysis                                                                                     | 2021 | Journal of Endodontics                                       |
| Siddiqui Y.D.; Omori K.; Ito T.; Yamashiro K.; Nakamura S.; Okamoto K.; Ono M.; Yamamoto T.; Dyke T.E.V.; Takashiba S.              | Resolvin D2 induces resolution of periapical inflammation and promotes healing of periapical lesions in rat periapical periodontitis                                                | 2019 | Frontiers in Immunology                                      |
| Chen J.; Xu H.; Xia K.; Cheng S.; Zhang Q.                                                                                          | Resolvin E1 accelerates pulp repair by regulating inflammation and stimulating dentin regeneration in dental pulp stem cells                                                        | 2021 | Stem Cell Research and Therapy                               |
| Xu H.; Chen J.; Ge J.; Xia K.; Tao S.; Su Y.; Zhang Q.                                                                              | Resolvin E1 Ameliorates Pulpitis by Suppressing Dental Pulp Fibroblast Activation in a Chemerin Receptor 23-dependent Manner                                                        | 2019 | Journal of Endodontics                                       |
| Nowicka A.; Lipski M.; Parafiniuk M.; Sporniak-Tutak K.; Lichota D.; Kosierkiewicz A.; Kaczmarek W.; Buczkowska-Radlińska J.        | Response of human dental pulp capped with biodentine and mineral trioxide aggregate                                                                                                 | 2013 | Journal of Endodontics                                       |
| Louwakul P.; Lertchirakarn V.                                                                                                       | Response of inflamed pulps of rat molars after capping with pulp-capping material containing fluocinolone acetonide                                                                 | 2015 | Journal of Endodontics                                       |
| Mahgoli H.A.; Arshad M.; Rasouli K.                                                                                                 | Restoration of endodontically treated cracked maxillary teeth: A case series                                                                                                        | 2019 | Clinical Case Reports                                        |
| Guruprasada                                                                                                                         | Restoration of fractured endodontically treated mandibular first molar using custom made cast post and core                                                                         | 2015 | Medical Journal Armed Forces India                           |
| Jain A., Bhat V., Sridevi U.                                                                                                        | Restoration of highly mutilated endodontically treated multi-rooted teeth using customized interlocking post & core: A case report                                                  | 2015 | Nitte University Journal of Health Science                   |
| Memarpour M, Shafiei F.                                                                                                             | Restoration of primary anterior teeth using intracanal polyethylene fibers and composite: an in vivo study                                                                          | 2013 | J Adhes Dent                                                 |
| Salah A.; Raghad H.; Khalid A.; Hamid A.                                                                                            | Restoration of Primary Anterior Teeth with Glass Fiber-Reinforced Post and Core: 3-Year Follow-Up Case Report                                                                       | 2021 | Case Reports in Dentistry                                    |
| Jardim JJ, Mestrinho HD, Koppe B, de Paula LM, Alves LS, Yamaguti PM, Almeida JCF, Maltz M.                                         | Restorations after selective caries removal: 5-Year randomized trial                                                                                                                | 2020 | J Dent                                                       |

|                                                                                                                  |                                                                                                                                                                                             |      |                                                         |
|------------------------------------------------------------------------------------------------------------------|---------------------------------------------------------------------------------------------------------------------------------------------------------------------------------------------|------|---------------------------------------------------------|
| Ferrari M., Pontoriero D.I.K., Ferrari Cagidiaco E., Carboncini F.                                               | Restorative difficulty evaluation system of endodontically treated teeth                                                                                                                    | 2022 | Journal of Esthetic and Restorative Dentistry           |
| Okuno T., Suzuki H., Inoue A., Kusakawa J.                                                                       | Restricted Mandibular Movement Attributed to Ossification of Mandibular Depressors and Medial Pterygoid Muscles in Patients With Fibrodysplasia Ossificans Progressiva: A Report of 3 Cases | 2017 | Journal of Oral and Maxillofacial Surgery               |
| Wang F.-M.; Hu Z.; Liu X.; Feng J.Q.; Augsburg R.A.; Gutmann J.L.; Glickman G.N.                                 | Resveratrol represses tumor necrosis factor $\alpha$ /c-Jun N-terminal kinase signaling via autophagy in human dental pulp stem cells                                                       | 2019 | Archives of Oral Biology                                |
| Chen X, Zhang H, Zhong J, Yan W, Lin B, Ding M, Xue S, Xia B.                                                    | Retraction Note: Comparison of indirect pulp treatment and iRoot BP Plus pulpotomy in primary teeth with extremely deep caries: a prospective randomized trial                              | 2022 | Clin Oral Investig                                      |
| Chawla A., Sujlana A., Dixit A.                                                                                  | Re-treating a maxillary second molar with 6 root canals assisted by cone beam computed tomography                                                                                           | 2015 | General dentistry                                       |
| Burdurlu M.C., Dagasan V.C., Tunc O., Güler N.                                                                   | Retrograde peri-implantitis: Evaluation and treatment protocols of a rare lesion                                                                                                            | 2021 | Quintessence International                              |
| Ortega-Verdugo P, Warren JJ, Kolker JL, Carter KD, Guzmán-Armstrong S, Gomez MR.                                 | Retrospective analysis of factors associated with the success of stepwise excavation procedure in deep carious lesions                                                                      | 2018 | J Am Dent Assoc                                         |
| Yu L.; Kahler B.; Nanayakkara S.; Prabhu N.                                                                      | Retrospective analysis of the outcomes of pulpotomies in traumatised permanent anterior teeth                                                                                               | 2022 | Dental Traumatology                                     |
| Bansal A.; Parihar A.S.; Sethi A.; Majety K.K.; Panjabi J.; Choudhury B.K.                                       | Retrospective assessment of healing outcome of endodontic treatment for mandibular molars with C-shaped root canal                                                                          | 2017 | Journal of Contemporary Dental Practice                 |
| Hui-Derksen E.K.; Chen C.F.; Majewski R.; Tootla R.G.; Boynton J.R.                                              | Retrospective record review: reinforced zinc oxide-eugenol pulpotomy: a retrospective study.                                                                                                | 2013 | Pediatric dentistry                                     |
| Wang N, Zhao YM.                                                                                                 | Retrospective study of dental treatment under general anesthesia of 62 disabled children and adolescents                                                                                    | 2018 | Beijing Da Xue Xue Bao Yi Xue Ban                       |
| Wunsch P.B., Kuhnen M.M., Best A.M., Brickhouse T.H.                                                             | Retrospective Study of the Survival Rates of Indirect Pulp Therapy Versus Different Pulpotomy Medicaments                                                                                   | 2016 | Pediatric dentistry                                     |
| Xie Y.; Lu F.; Hong Y.; He J.; Lin Y.                                                                            | Revascularisation versus apexification for treatment of immature teeth based on periapical healing and root development: A systematic review and meta-analysis                              | 2021 | European Journal of Paediatric Dentistry                |
| Archana M.S.; Sujana V.; Nagesh B.; Babu P.J.K.                                                                  | Revascularization - An overview                                                                                                                                                             | 2012 | Journal of International Dental and Medical Research    |
| Ramezani M., Sanaei-rad P., Hajihassani N.                                                                       | Revascularization and vital pulp therapy in immature molars with necrotic pulp and irreversible pulpitis: A case report with two-year follow-up                                             | 2020 | Clinical Case Reports                                   |
| Nagaveni N.B.; Pathak S.; Poornima P.; Joshi J.S.                                                                | Revascularization induced maturogenesis of non-vital immature permanent tooth using platelet-rich-fibrin: A case report                                                                     | 2016 | Journal of Clinical Pediatric Dentistry                 |
| Nagaveni N.B.; Poornima P.; Joshi J.S.; Pathak S.; Nandini D.B.                                                  | Revascularization of immature, nonvital permanent tooth using platelet-rich fibrin in children                                                                                              | 2015 | Pediatric dentistry                                     |
| Sumidarti A.; Moersidi S.N.M.                                                                                    | Reversible pulpitis accompanied with sinus tract on buccal side of the right maxillary first premolar teeth: case report                                                                    | 2019 | Journal of Dentomaxillofacial Science                   |
| Gudkina J, Mindere A, Locane G, Brinkmane A.                                                                     | Review of the success of pulp exposure treatment of cariously and traumatically exposed pulps in immature permanent incisors and molars                                                     | 2012 | Stomatologija                                           |
| Srikawnawan W.; Songsaad A.; Gonmanee T.; Thonabulsombat C.; Phruksaniyom C.; White K.L.; Ruangsawasdi N.        | Rho kinase inhibitor induced human dental pulp stem cells to differentiate into neurons                                                                                                     | 2022 | Life Sciences                                           |
| Tankova H., Mitova N., Rashkova M., Popova H.                                                                    | Risk factors and gingival inflammation in children aged 10 to 14 years-an epidemiological study                                                                                             | 2021 | Journal of IMAB - Annual Proceeding (Scientific Papers) |
| Ma J.; Chen W.; Zhang L.; Tucker B.; Zhu G.; Sasaki H.; Hao L.; Wang L.; Ci H.; Jiang H.; Stashenko P.; Li Y.-P. | RNA interference-mediated silencing of Atp6i prevents both periapical bone erosion and inflammation in the mouse model of endodontic disease                                                | 2013 | Infection and Immunity                                  |
| Hu J.; Chen W.; Qiu Z.; Lv H.                                                                                    | Robust expression of SIRT6 inhibits pulpitis via activation of the TRPV1 channel                                                                                                            | 2020 | Cell Biochemistry and Function                          |
| Lv K, Wang G, Shen C, Zhang X, Yao H.                                                                            | Role and mechanism of the nod-like receptor family pyrin domain-containing 3 inflammasome in oral disease                                                                                   | 2019 | Arch Oral Biol                                          |



|                                                                                                                                                                                    |                                                                                                                                                       |      |                                                      |
|------------------------------------------------------------------------------------------------------------------------------------------------------------------------------------|-------------------------------------------------------------------------------------------------------------------------------------------------------|------|------------------------------------------------------|
| Tavangar M.S.; Hosseini S.-M.; Dehghani-Nazhvani A.; Monabati A.                                                                                                                   | Role of CD146 enrichment in purification of stem cells derived from dental pulp polyp                                                                 | 2017 | Iranian Endodontic Journal                           |
| Huang Y.; Qiao W.; Wang X.; Gao Q.; Peng Y.; Bian Z.; Meng L.                                                                                                                      | Role of Ku70 in the apoptosis of inflamed dental pulp stem cells                                                                                      | 2018 | Inflammation Research                                |
| Javed F.; Kellesarian S.V.; Abduljabbar T.; Gholamiazizi E.; Feng C.; Aldosary K.; Vohra F.; Romanos G.E.                                                                          | Role of laser irradiation in direct pulp capping procedures: a systematic review and meta-analysis                                                    | 2017 | Lasers in Medical Science                            |
| Kanno K, Shimizu K, Shinoda M, Hayashi M, Takeichi O, Iwata K.                                                                                                                     | Role of macrophage-mediated Toll-like receptor 4-interleukin-1R signaling in ectopic tongue pain associated with tooth pulp inflammation              | 2020 | J Neuroinflammation                                  |
| Kanno K.; Shimizu K.; Shinoda M.; Hayashi M.; Takeichi O.; Iwata K.                                                                                                                | Role of macrophage-mediated Toll-like receptor 4-interleukin-1R signaling in ectopic tongue pain associated with tooth pulp inflammation              | 2020 | Journal of Neuroinflammation                         |
| Komiya H, Shimizu K, Noma N, Tsuboi Y, Honda K, Kanno K, Ohara K, Shinoda M, Ogiso B, Iwata K.                                                                                     | Role of Neuron-Glial Interaction Mediated by IL-1 $\beta$ in Ectopic Tooth Pain                                                                       | 2018 | J Dent Res                                           |
| Suzuki-Barrera K.; Makishi S.; Nakatomi M.; Saito K.; Ida-Yonemochi H.; Ohshima H.                                                                                                 | Role of osteopontin in the process of pulpal healing following tooth replantation in mice                                                             | 2022 | Regenerative Therapy                                 |
| Di Tinco R.; Bertani G.; Pisciotto A.; Bertoni L.; Pignatti E.; Maccaferri M.; Bertacchini J.; Sena P.; Vallarola A.; Tupler R.; Croci S.; Bonacini M.; Salvarani C.; Carnevale G. | Role of PD-L1 in licensing immunoregulatory function of dental pulp mesenchymal stem cells                                                            | 2021 | Stem Cell Research and Therapy                       |
| Cha M.; Sallem I.; Jang H.W.; Jung I.Y.                                                                                                                                            | Role of transient receptor potential vanilloid type 1 in the trigeminal ganglion and brain stem following dental pulp inflammation                    | 2020 | International Endodontic Journal                     |
| De Pablo Ó.V.; Estevez R.; Heilborn C.; Cohenca N.                                                                                                                                 | Root anatomy and canal configuration of the permanent mandibular first molar: Clinical implications and recommendations                               | 2012 | Quintessence International                           |
| Pedemonte E, Cabrera C, Torres A, Jacobs R, Harnisch A, Ramírez V, Concha G, Briner A, Brizuela C.                                                                                 | Root and canal morphology of mandibular premolars using cone-beam computed tomography in a Chilean and Belgian subpopulation: a cross-sectional study | 2018 | Oral Radiol                                          |
| Ravi R., Rajesh R., Nama R., Alankrutha G., Nallabolu R.R., Singh R.                                                                                                               | Root as a novel post and core material for primary teeth: A case report                                                                               | 2020 | Journal of Pharmacy and Bioallied Sciences           |
| Nascimento EHL, Nascimento MCC, Gaêta-Araujo H, Fontenele RC, Freitas DQ.                                                                                                          | Root canal configuration and its relation with endodontic technical errors in premolar teeth: a CBCT analysis                                         | 2019 | Int Endod J                                          |
| Karunakaran J., Samuel L., Rishal Y., Joseph M., Suresh K., Varghese S.                                                                                                            | Root canal configuration of human permanent mandibular first molars of an indo-dravidian population based in Southern India: An in vitro study        | 2017 | Journal of Pharmacy and Bioallied Sciences           |
| Zhang X.; Chen Y.; Li C.; Xue Z.; Wu H.; Li J.; Ou H.; Shen J.; Ding D.                                                                                                            | Root Canal Disinfection Using Highly Effective Aggregation-Induced Emission Photosensitizer                                                           | 2021 | ACS Applied Bio Materials                            |
| Dalzell O.; Mohd Ariffin S.; Patrick C.J.; Hardiman R.; Manton D.J.; Parashos P.; Rajan S.                                                                                         | Root canal instrumentation efficacy of non-fused and fused primary molar roots: a micro-computed tomography study                                     | 2021 | European Archives of Paediatric Dentistry            |
| Kyaw Moe M.M., Ha J.H., Jin M.U., Kim Y.K., Kim S.K.                                                                                                                               | Root Canal Shaping Effect of Instruments with Offset Mass of Rotation in the Mandibular First Molar: A Micro-computed Tomographic Study               | 2018 | Journal of endodontics                               |
| Landw D.J.                                                                                                                                                                         | Root canal shaping using a reciprocating file system                                                                                                  | 2013 | Dentistry Today                                      |
| Hoshiyari N., Shakeri F., Kohsar A.H.                                                                                                                                              | Root canal treatment of a geminated maxillary lateral incisor: A case report                                                                          | 2020 | Journal of Mazandaran University of Medical Sciences |
| Mathew J.; Devadathan A.; Syriac G.; Shamini S.                                                                                                                                    | Root canal treatment of a maxillary first premolar with three roots                                                                                   | 2015 | Journal of Pharmacy and Bioallied Sciences           |
| Shalavi S, Mohammadi Z, Abdolrazzagh M.                                                                                                                                            | Root canal treatment of maxillary and mandibular three-rooted premolars: case reports                                                                 | 2012 | Iran Endod J                                         |
| Olivieri JG, Duran-Sindreu F.                                                                                                                                                      | Root Dentine Thickness and Concavity Depth in Mandibular Molars: A Cone Beam Computed Tomography Population Study                                     | 2018 | Eur Endod J                                          |
| Senan E.M.; Alhadainy H.A.; Genaid T.M.; Madfa A.A.                                                                                                                                | Root form and canal morphology of maxillary first premolars of a Yemeni population                                                                    | 2018 | BMC Oral Health                                      |
| Witt CV, Hirt T, Rutz G, Luder HU.                                                                                                                                                 | Root malformation associated with a cervical mineralized diaphragm—a distinct form of tooth abnormality?                                              | 2014 | Oral Surg Oral Med Oral Pathol Oral Radiol           |

|                                                                                                                                                                                                                                                                                                       |                                                                                                                                                                                   |      |                                                                   |
|-------------------------------------------------------------------------------------------------------------------------------------------------------------------------------------------------------------------------------------------------------------------------------------------------------|-----------------------------------------------------------------------------------------------------------------------------------------------------------------------------------|------|-------------------------------------------------------------------|
| Ozdogan M.S.; Gungormus M.; Ince Yusufoglu S.; Ertem S.Y.; Sonmez C.; Orhan M.                                                                                                                                                                                                                        | Salivary opiorphin in dental pain: A potential biomarker for dental disease                                                                                                       | 2019 | Archives of Oral Biology                                          |
| Kosch JCD, Zanno LE.                                                                                                                                                                                                                                                                                  | Sampling impacts the assessment of tooth growth and replacement rates in archosaurs: implications for paleontological studies                                                     | 2020 | PeerJ                                                             |
| Hassona Y., Rajab L., Taimeh D., Scully C.                                                                                                                                                                                                                                                            | Sanjad-Sakati Syndrome: Oral Health Care                                                                                                                                          | 2018 | Medical Principles and Practice                                   |
| Syed-Picard F.N.; Ray Jr. H.L.; Kumta P.N.; Sfeir C.                                                                                                                                                                                                                                                  | Scaffoldless tissue-engineered dental pulp cell constructs for endodontic therapy                                                                                                 | 2014 | Journal of Dental Research                                        |
| Colombo J.S.; Moore A.N.; Hartgerink J.D.; D'Souza R.N.                                                                                                                                                                                                                                               | Scaffolds to control inflammation and facilitate dental pulp regeneration                                                                                                         | 2014 | Journal of Endodontics                                            |
| Jones CA, Bracewell T.                                                                                                                                                                                                                                                                                | Scanning electron microscopy (SEM) and macroscopic analysis of immature human permanent molar immersion in hydrochloric acid (HCL, 38%)                                           | 2022 | J Forensic Leg Med                                                |
| Wang D.; Lyu Y.; Yang Y.; Zhang S.; Chen G.; Pan J.; Tian W.                                                                                                                                                                                                                                          | Schwann cell-derived EVs facilitate dental pulp regeneration through endogenous stem cell recruitment via SDF-1/CXCR4 axis                                                        | 2022 | Acta Biomaterialia                                                |
| Liao C, Liang S, Wang Y, Zhong T, Liu X.                                                                                                                                                                                                                                                              | Sclerostin is a promising therapeutic target for oral inflammation and regenerative dentistry                                                                                     | 2022 | J Transl Med                                                      |
| Watson E.E.; Metcalfe J.E.; Kreher M.R.; Maxymiw W.G.; Glogauer M.; Schimmer A.D.                                                                                                                                                                                                                     | Screening for dental infections achieves 6-fold reduction in dental emergencies during induction chemotherapy for acute myeloid leukemia                                          | 2020 | JCO Oncology Practice                                             |
| Descamps E.; Gorlier C.; Ottaviani S.; Palazzo E.; Dieudé P.; Forien M.                                                                                                                                                                                                                               | Screening of dental and sinus infections in rheumatoid arthritis                                                                                                                  | 2021 | European Journal of Clinical Investigation                        |
| Li M.; Sun X.; Ma L.; Jin L.; Zhang W.; Xiao M.; Yu Q.                                                                                                                                                                                                                                                | SDF-1/CXCR4 axis induces human dental pulp stem cell migration through FAK/PI3K/Akt and GSK3β/β-catenin pathways                                                                  | 2017 | Scientific Reports                                                |
| Küçükkaya Eren S., Görduysus M.Ö., Şahin C.                                                                                                                                                                                                                                                           | Sealing ability and adaptation of root-end filling materials in cavities prepared with different techniques                                                                       | 2017 | Microscopy research and technique                                 |
| Ramalingam K.; Kaliyamurthy S.D.; Govindarajan M.; Swathi S.                                                                                                                                                                                                                                          | Seckel syndrome: A report of a case                                                                                                                                               | 2012 | Journal of Indian Society of Pedodontics and Preventive Dentistry |
| Prati C., Zamparini F., Spinelli A., Pelliccioni G.A., Pirani C., Gandolfi M.G.                                                                                                                                                                                                                       | Secondary root canal treatment with reciproc blue and K-file: Radiographic and esem-edx analysis of dentin and root canal filling remnants                                        | 2020 | Journal of Clinical Medicine                                      |
| Hiremath H.; Saikalyan S.; Kulkarni S.S.; Hiremath V.                                                                                                                                                                                                                                                 | Second-generation platelet concentrate (PRF) as a pulpotomy medicament in a permanent molar with pulpitis: A case report                                                          | 2012 | International Endodontic Journal                                  |
| Steiner R.; Fischer-Colbrie R.; Bletsa A.; Laimer J.; Troger J.                                                                                                                                                                                                                                       | Secretoneurin and PE-11 immunoreactivity in the human dental pulp                                                                                                                 | 2018 | Archives of Oral Biology                                          |
| Lin X, Fu YJ, Ren GQ, Wen JH, Chen YF, Zhang Q.                                                                                                                                                                                                                                                       | Segmentation and accuracy validation of mandibular molar and pulp cavity on cone-beam CT images by U-net neural network                                                           | 2022 | Shanghai Kou Qiang Yi Xue                                         |
| Clarkson JE, Ramsay CR, Ricketts D, Banerjee A, Deery C, Lamont T, Boyers D, Marshman Z, Goulao B, Banister K, Conway D, Dawett B, Baker S, Sherriff A, Young L, van der Pol M, MacLennan G, Floate R, Braid H, Fee P, Forrest M, Gouick J, Mitchell F, Gupta E, Dakri R, Kettle J, McGuff T, Dunn K. | Selective Caries Removal in Permanent Teeth (SCRiPT) for the treatment of deep carious lesions: a randomised controlled clinical trial in primary care                            | 2021 | BMC Oral Health                                                   |
| Schwendicke F, Leal S, Schlattmann P, Paris S, Dias Ribeiro AP, Gomes Marques M, Hilgert LA.                                                                                                                                                                                                          | Selective carious tissue removal using subjective criteria or polymer bur: study protocol for a randomised controlled trial (SelecCT)                                             | 2018 | BMJ Open                                                          |
| Verdugo-Paiva F, Zambrano-Achig P, Simancas-Racines D, Viteri-García A.                                                                                                                                                                                                                               | Selective removal compared to complete removal for deep carious lesions                                                                                                           | 2020 | Medwave                                                           |
| Gözetici-Çil B, Erdem-Hepşenoğlu Y, Tekin A, Özcan M.                                                                                                                                                                                                                                                 | Selective removal to soft dentine or selective removal to firm dentine for deep caries lesions in permanent posterior teeth: a randomized controlled clinical trial up to 2 years | 2023 | Clin Oral Investig                                                |
| Labib M.E., Hassanein O.E., Moussa M., Yassen A., Schwendicke F.                                                                                                                                                                                                                                      | Selective versus stepwise removal of deep carious lesions in permanent teeth: A randomised controlled trial from Egypt - An interim analysis                                      | 2019 | BMJ Open                                                          |
| Yao Y, Luo A, Hao Y.                                                                                                                                                                                                                                                                                  | Selective versus stepwise removal of deep carious lesions: A meta-analysis of randomized controlled trials                                                                        | 2023 | J Dent Sci                                                        |

|                                                                                                                  |                                                                                                                                                                                                                                           |      |                                                          |
|------------------------------------------------------------------------------------------------------------------|-------------------------------------------------------------------------------------------------------------------------------------------------------------------------------------------------------------------------------------------|------|----------------------------------------------------------|
| Elhennawy K, Finke C, Paris S, Reda S, Jost-Brinkmann PG, Schwendicke F.                                         | Selective vs stepwise removal of deep carious lesions in primary molars: 12-Months results of a randomized controlled pilot trial                                                                                                         | 2018 | J Dent                                                   |
| Barros MMAF, De Queiroz Rodrigues MI, Muniz FWMG, Rodrigues LKA.                                                 | Selective, stepwise, or nonselective removal of carious tissue: which technique offers lower risk for the treatment of dental caries in permanent teeth? A systematic review and meta-analysis                                            | 2020 | Clin Oral Investig                                       |
| Nguyen P.K.; Gao W.; Patel S.D.; Siddiqui Z.; Weiner S.; Shimizu E.; Sarkar B.; Kumar V.A.                       | Self-Assembly of a Dentinogenic Peptide Hydrogel                                                                                                                                                                                          | 2018 | ACS Omega                                                |
| Ali A.H., Koller G., Foschi F., Andiappan M., Bruce K.D., Banerjee A., Mannocci F.                               | Self-Limiting versus Conventional Caries Removal: A Randomized Clinical Trial                                                                                                                                                             | 2018 | Journal of dental research                               |
| Ali A.H.; Thani F.B.; Foschi F.; Banerjee A.; Mannocci F.                                                        | Self-limiting versus rotary subjective carious tissue removal: A randomized controlled clinical trial—2-year results                                                                                                                      | 2020 | Journal of Clinical Medicine                             |
| Perdoncini N.N., Furquim C.P., Bonfim C.M.S., Soares G.M.S., Torres-Pereira C.C.                                 | Self-perception of periodontal health status among individuals with Fanconi anemia                                                                                                                                                        | 2021 | Hematology, Transfusion and Cell Therapy                 |
| Singh A.K.; Khateeb S.U.; Pathrose S.P.; Kumar A.S.; Haribaskar S.; Thota G.                                     | SEM Evaluation of Various Intracanal Irrigation Devices on Smear Layer Removal: A Comparative Study                                                                                                                                       | 2021 | Journal of Contemporary Dental Practice                  |
| Shindo S.; Kumagai T.; Shirawachi S.; Takeda K.; Shiba H.                                                        | Semaphorin3A released from human dental pulp cells inhibits the increase in interleukin-6 and CXCL chemokine ligand 10 production induced by tumor necrosis factor- $\alpha$ through suppression of nuclear factor- $\kappa$ B activation | 2021 | Cell Biology International                               |
| Wahby M.A.R., Taha S.E.E., Masry E.S.E., Abd Al Gawad R.Y.                                                       | Severe root resorption after obturating a primary molar using zinc oxide and eugenol at different follow-up periods – a case report                                                                                                       | 2020 | Open Access Macedonian Journal of Medical Sciences       |
| Pawar A.M., Bhardwaj A., Zanza A., Wahjuningrum D.A., Arora S., Luke A.M., Karobari M.I., Reda R., Testarelli L. | Severity of Post-Operative Pain after Instrumentation of Root Canals by XP-Endo and SAF Full Sequences Compared to Manual Instrumentation: A Randomized Clinical Trial                                                                    | 2022 | Journal of Clinical Medicine                             |
| Cuadros-Fernández C.; Lorente Rodríguez A.I.; Sáez-Martínez S.; García-Binimelis J.; About I.; Mercadé M.        | Short-term treatment outcome of pulpotomies in primary molars using mineral trioxide aggregate and Biodentine: a randomized clinical trial                                                                                                | 2016 | Clinical Oral Investigations                             |
| Simon S, Perard M, Zanini M, Smith AJ, Charpentier E, Djole SX, Lumley PJ.                                       | Should pulp chamber pulpotomy be seen as a permanent treatment? Some preliminary thoughts                                                                                                                                                 | 2013 | Int Endod J                                              |
| Tajmehri N, Graham A, Deery C.                                                                                   | Should we root treat children's first permanent molars?                                                                                                                                                                                   | 2020 | Evid Based Dent                                          |
| Ferreira S.B.P.; Tavares W.L.F.; da Rosa M.A.C.; de Brito L.C.N.; Vieira L.Q.; Junior H.M.; Sobrinho A.P.R.      | Sickle Cell Anemia In Brazil: Personal, Medical And Endodontic Patterns                                                                                                                                                                   | 2016 | Brazilian Oral Research                                  |
| Ventä I., Vehkalahti M.M., Huuonen S., Suominen A.L.                                                             | Signs of disease occur in the majority of third molars in an adult population                                                                                                                                                             | 2017 | International Journal of Oral and Maxillofacial Surgery  |
| Zhu N.; Chatzistavrou X.; Papagerakis P.; Ge L.; Qin M.; Wang Y.                                                 | Silver-Doped Bioactive Glass/Chitosan Hydrogel with Potential Application in Dental Pulp Repair                                                                                                                                           | 2019 | ACS Biomaterials Science and Engineering                 |
| Xue D.; Gong Z.; Zhu F.; Qiu Y.; Li X.                                                                           | Simvastatin increases cell viability and suppresses the expression of cytokines and vascular endothelial growth factor in inflamed human dental pulp stem cells in vitro                                                                  | 2018 | Advances in Clinical and Experimental Medicine           |
| Jung J.Y.; Woo S.M.; Kim W.J.; Lee B.N.; Nör J.E.; Min K.S.; Choi C.H.; Koh J.T.; Lee K.J.; Hwang Y.C.           | Simvastatin inhibits the expression of inflammatory cytokines and cell adhesion molecules induced by LPS in human dental pulp cells                                                                                                       | 2017 | International Endodontic Journal                         |
| Jia W.; Zhao Y.; Yang J.; Wang W.; Wang X.; Ling L.; Ge L.                                                       | Simvastatin promotes dental pulp stem cell-induced coronal pulp regeneration in pulpotomized teeth                                                                                                                                        | 2016 | Journal of Endodontics                                   |
| Karthick A.; Pia J.C.; Tamilselvi R.; Mensudar R.                                                                | Single rooted mandibular first and second molars with single canal—A case report                                                                                                                                                          | 2019 | Indian Journal of Public Health Research and Development |
| Pulcini M.G., Vitelli C., Dian A., Radaelli K., Basso M.                                                         | Single tooth prosthetic restoration through surgical crown lengthening, conservative therapies and cad-cam milled restoration in lithium-disilicate: A case report                                                                        | 2019 | Acta Stomatologica Croatica                              |
| Mergoni G.; Ganim M.; Lodi G.; Figini L.; Gagliani M.; Manfredi M.                                               | Single versus multiple visits for endodontic treatment of permanent teeth                                                                                                                                                                 | 2022 | Cochrane Database of Systematic Reviews                  |
| Edionwe J.I.; Shaba O.P.; Umesi D.C.                                                                             | Single visit root canal treatment: A prospective study                                                                                                                                                                                    | 2014 | Nigerian Journal of Clinical Practice                    |

|                                                                                                                         |                                                                                                                                                                                                                                                                                                                         |      |                                             |
|-------------------------------------------------------------------------------------------------------------------------|-------------------------------------------------------------------------------------------------------------------------------------------------------------------------------------------------------------------------------------------------------------------------------------------------------------------------|------|---------------------------------------------|
| Haridoss S.; Swaminathan K.; Rajendran V.; Rajendran B.                                                                 | Single-rooted primary first mandibular molar                                                                                                                                                                                                                                                                            | 2014 | BMJ Case Reports                            |
| Persic Bukmir R., Vidas J., Mance D., Pezelj-Ribaric S., Spalj S., Brekalo Prso I.                                      | Socio-economic and health status as a predictor of apical periodontitis in adult patients in Croatia                                                                                                                                                                                                                    | 2019 | Oral Diseases                               |
| Jakšić Gvozdić D.J.; Milovanović J.R.                                                                                   | Socioeconomic significance and prevention of early childhood caries; Socio-ekonomski značaj i prevencija karijesa ranog djetinjstva                                                                                                                                                                                     | 2014 | Acta Stomatologica Naissi                   |
| Deshwal R., Salaria S.K., Dahiya R., Deshwal N.                                                                         | Socket-shield technique with minimally invasive osteotomy preparation as well as simultaneous sinus lift utilizing Densah Bur and platelet-rich fibrin membrane followed by immediate implant placement in a symptomatic posterior endodontically treated decayed root stumps site: A case report with 1-year follow-up | 2022 | Journal of Indian Society of Periodontology |
| Klein U.; Kleier D.J.                                                                                                   | Sodium hypochlorite accident in a pediatric patient                                                                                                                                                                                                                                                                     | 2013 | Pediatric Dentistry                         |
| Al-Mutairi M.A.; Bawazir O.A.                                                                                           | Sodium Hypochlorite versus Formocresol in primary molars pulpotomies: A randomized clinical trial                                                                                                                                                                                                                       | 2013 | European Journal of Paediatric Dentistry    |
| Palone M.; Casella S.; De Sbrocchi A.; Siciliani G.; Lombardo L.                                                        | Space closure by miniscrew-assisted mesialization of an upper third molar and partial vestibular fixed appliance: A case report                                                                                                                                                                                         | 2022 | International Orthodontics                  |
| Ivanova EV, Shamkhalov GS, Dmitrieva NA, Akhmedova ZR.                                                                  | Specific features of materials for initial pulpitis treatment                                                                                                                                                                                                                                                           | 2014 | Stomatologija (Mosk)                        |
| Kwon SR, Dawson DV, Schenck DM, Fiegel J, Wertz PW.                                                                     | Spectrophotometric Evaluation of Potassium Nitrate Penetration Into the Pulp Cavity                                                                                                                                                                                                                                     | 2015 | Oper Dent                                   |
| Smail-Faugeron V.; Muller-Bolla M.; Sixou J.-L.; Courson F.                                                             | Split-mouth and parallel-arm trials to compare pain with intraosseous anaesthesia delivered by the computerised Quicksleeper system and conventional infiltration anaesthesia in paediatric oral healthcare: Protocol for a randomised controlled trial                                                                 | 2015 | BMJ Open                                    |
| Sagomonyants K.; Mina M.                                                                                                | Stage-specific effects of fibroblast growth factor 2 on the differentiation of dental pulp cells                                                                                                                                                                                                                        | 2014 | Cells Tissues Organs                        |
| Ozorio J.E.V.; De Oliveira E Silva Carvalho L.F.; De Oliveira D.A.; De Sousa-Neto M.D.; Da Cruz Perez D.E.              | Standardized propolis extract and calcium hydroxide as pulpotomy agents in primary pig teeth                                                                                                                                                                                                                            | 2012 | Journal of Dentistry for Children           |
| Hsieh S.-C.; Tsao J.-T.; Lew W.-Z.; Chan Y.-H.; Lee L.-W.; Lin C.-T.; Huang Y.-K.; Huang H.-M.                          | Static magnetic field attenuates lipopolysaccharide-induced inflammation in pulp cells by affecting cell membrane stability                                                                                                                                                                                             | 2015 | Scientific World Journal                    |
| Cai J, Palamara J, Manton DJ, Burrow MF.                                                                                | Status and progress of treatment methods for root caries in the last decade: a literature review                                                                                                                                                                                                                        | 2018 | Aust Dent J                                 |
| Liang C, Liao L, Tian W.                                                                                                | Stem Cell-based Dental Pulp Regeneration: Insights From Signaling Pathways                                                                                                                                                                                                                                              | 2021 | Stem Cell Rev Rep                           |
| Bjørndal L.                                                                                                             | Stepwise Excavation                                                                                                                                                                                                                                                                                                     | 2018 | Monogr Oral Sci                             |
| Massón M, Viteri-García A, Verdugo-Paiva F.                                                                             | Stepwise removal compared to complete removal for deep carious lesions                                                                                                                                                                                                                                                  | 2022 | Medwave                                     |
| Morales R.; Trujillo E.; Cantín M.                                                                                      | Stereological characterization of odontoblasts in normal healthy and reversible pulpitis in human dental pulps; Caracterización estereológica de odontoblastos en pulpas dentarias humanas sanas y con pulpitis reversible                                                                                              | 2014 | International Journal of Morphology         |
| Kim J.-G.; Son K.M.; Park H.C.; Zhu T.; Kwon J.H.; Yang H.-C.                                                           | Stimulating effects of quercetin and phenamil on differentiation of human dental pulp cells                                                                                                                                                                                                                             | 2013 | European Journal of Oral Sciences           |
| Songsiripraduboon S.; Kladkaew S.; Trairatvorakul C.; Sangvanich P.; Soontornvipart K.; Banlunara W.; Thunyakitpisal P. | Stimulation of Dentin Regeneration by Using Acemannan in Teeth with Lipopolysaccharide-induced Pulp Inflammation                                                                                                                                                                                                        | 2017 | Journal of Endodontics                      |
| Pan L, Dumoncel J, Mazurier A, Zanolli C.                                                                               | Structural analysis of premolar roots in Middle Pleistocene hominins from China                                                                                                                                                                                                                                         | 2019 | J Hum Evol                                  |
| Chang Y.; Zhu Z.; Shen N.; Zhao G.                                                                                      | STUDY OF BACTERIAL LEVELS AND ENDOTOXIN CONTENT IN REVERSIBLE PULPITIS CARIES                                                                                                                                                                                                                                           | 2022 | Acta Medica Mediterranea                    |
| Wang M, Yin S, Wang Q, Gao Y, Wang Y, Zhang L.                                                                          | Study of molar furcal perforation repaired with iRoot BP                                                                                                                                                                                                                                                                | 2013 | Hua Xi Kou Qiang Yi Xue Za Zhi              |
| Todea C.; Igna A.; Ogodescu E.; Zetu I.; Ogodescu A.                                                                    | Study of the compatibility of new biomaterials in vital pulp therapy in pediatric dentistry                                                                                                                                                                                                                             | 2018 | Revista de Chimie                           |
| Weimann D, Morgenthal A, Schwendicke F, Fleck C, Razi H.                                                                | Substantial regional differences in the biomechanical behavior of molar treated with selective caries tissue removal technique: a finite element study                                                                                                                                                                  | 2021 | Dent Mater                                  |

|                                                                                                             |                                                                                                                                                                                                           |      |                                                                                |
|-------------------------------------------------------------------------------------------------------------|-----------------------------------------------------------------------------------------------------------------------------------------------------------------------------------------------------------|------|--------------------------------------------------------------------------------|
| Suhag K, Duhan J, Tewari S, Sangwan P.                                                                      | Success of Direct Pulp Capping Using Mineral Trioxide Aggregate and Calcium Hydroxide in Mature Permanent Molars with Pulp Exposed during Carious Tissue Removal: 1-year Follow-up                        | 2019 | J Endod                                                                        |
| Taylor G.D., Vernazza C.R., Abdulmohsen B.                                                                  | Success of endodontic management of compromised first permanent molars in children: A systematic review                                                                                                   | 2020 | International journal of paediatric dentistry                                  |
| Tewari N, Goel S, Mathur VP, O'Connell AC, Johnson RM, Rahul M, Sultan F, Goswami M, Srivastav S, Ritwik P. | Success of medicaments and techniques for pulpotomy of primary teeth: An overview of systematic reviews                                                                                                   | 2022 | Int J Paediatr Dent                                                            |
| Santos-Junior A.; De Castro Pinto L.; Mateo-Castillo J.; Pinheiro C.                                        | Success or failure of endodontic treatments: A retrospective study                                                                                                                                        | 2019 | Journal of Conservative Dentistry                                              |
| Abd Al Gawad R.Y.; Hanafy R.M.H.                                                                            | Success rate of three capping materials used in pulpotomy of primary molars: A randomized clinical trial                                                                                                  | 2021 | Saudi Dental Journal                                                           |
| Amin M, Nouri MR, Hulland S, ElSalhy M, Azarpazhooh A.                                                      | Success Rate of Treatments Provided for Early Childhood Caries under General Anesthesia: A Retrospective Cohort Study                                                                                     | 2016 | Pediatr Dent                                                                   |
| Trairatvorakul C, Detsomboonrat P.                                                                          | Success rates of a mixture of ciprofloxacin, metronidazole, and minocycline antibiotics used in the non-instrumentation endodontic treatment of mandibular primary molars with carious pulpal involvement | 2012 | Int J Paediatr Dent                                                            |
| Lin GSS, Hisham ARB, Ch Er CIY, Cheah KK, Ghani NRNA, Noorani TY.                                           | Success rates of coronal and partial pulpotomies in mature permanent molars: a systematic review and single-arm meta-analysis                                                                             | 2021 | Quintessence Int                                                               |
| Clark W, Geneser M, Owais A, Kanellis M, Qian F.                                                            | Success rates of Hall technique crowns in primary molars: a retrospective pilot study                                                                                                                     | 2017 | Gen Dent                                                                       |
| Midani R, Splieth CH, Mustafa Ali M, Schmoedel J, Mourad SM, Santamaria RM.                                 | Success rates of preformed metal crowns placed with the modified and standard hall technique in a paediatric dentistry setting                                                                            | 2019 | Int J Paediatr Dent                                                            |
| Guyen Y, Aksakal SD, Avcu N, Unsal G, Tuna EB, Aktoren O.                                                   | Success Rates of Pulpotomies in Primary Molars Using Calcium Silicate-Based Materials: A Randomized Control Trial                                                                                         | 2017 | Biomed Res Int                                                                 |
| Yepes J.F.; Schweppe J.; Jones J.; Tang Q.; Eckert G.J.; Downey T.; Maupome G.                              | Success Rates of Pulpotomies Performed by General Dentists Versus Pediatric Dentists: A Claims Data Analysis                                                                                              | 2020 | Pediatric dentistry                                                            |
| Alshawwa H., Wang J.-F., Liu M., Sun S.-F.                                                                  | Successful management of a tooth with endodontic-periodontal lesion: A case report                                                                                                                        | 2020 | World Journal of Clinical Cases                                                |
| Behdad S., Caramés G., Pereira B., Pires M.D., Vasconcelos I., Ginjeira A.                                  | Successful management of mandibular first molars with endodontic-periodontal lesions – Two case reports                                                                                                   | 2021 | Revista Portuguesa de Estomatologia, Medicina Dentaria e Cirurgia Maxilofacial |
| El Shahawy O.I., O'Connell A.C.                                                                             | Successful Restoration of Severely Mutilated Primary Incisors Using a Novel Method to Retain Zirconia Crowns - Two Year Results                                                                           | 2016 | The Journal of clinical pediatric dentistry                                    |
| Okaguchi M., Kuo T., Ho Y.-C.                                                                               | Successful treatment of vertical root fracture through intentional replantation and root fragment bonding with 4-META/MMA-TBB resin                                                                       | 2019 | Journal of the Formosan Medical Association                                    |
| Ceperuelo D.; Lozano M.; Duran-Sindreu F.; Mercadé M.                                                       | Supernumerary fourth molar and dental pathologies in a Chalcolithic individual from the El Mirador Cave site (Sierra de Atapuerca, Burgos, Spain)                                                         | 2015 | HOMO                                                                           |
| Satheesh S.L., Jain S., Bhuyan A.C., Devi L.S.                                                              | Surgical management of a separated endodontic instrument using second generation platelet concentrate and hydroxyapatite                                                                                  | 2017 | Journal of Clinical and Diagnostic Research                                    |
| Zhukhovitskaya A.; Chang D.T.; Huoh K.C.; Pham N.S.; Singh J.; Ahuja G.S.                                   | Surgical management of atypical mycobacterial cervical lymphadenitis in an outbreak of odontological infection                                                                                            | 2020 | International Journal of Pediatric Otorhinolaryngology                         |
| Modesto F.; Heimann M.; Donnelly T.M.                                                                       | SURGICAL MANAGEMENT OF PANCREATIC NODULAR HYPERPLASIA BY PARTIAL PANCREATECTOMY IN A BLACK-TAILED PRAIRIE DOG (CYNOMYS LUDOVICIANUS)                                                                      | 2018 | Journal of Exotic Pet Medicine                                                 |
| Chauhan P.S., Vellore K.P., Challa S.K., Ganesh M., Saigeeta K., Niharika S.                                | SURGICAL MANAGEMENT OF RADICULAR CYST AMONG ADOLESCENTS: CASE SERIES                                                                                                                                      | 2022 | NeuroQuantology                                                                |
| Masgutova G.; Mukhamedshina Y.; Sergeev M.; Shulman I.; Ogurtsov S.; Masgutov R.; Rizvanov A.               | Surgical Procedure for Extracting Pig Teeth for Isolation and Cultivation of Mesenchymal Stem Cells from Dental Pulp for Regenerative Therapy Applications                                                | 2017 | BioNanoScience                                                                 |

|                                                                                                                                          |                                                                                                                                                                                                 |      |                                                     |
|------------------------------------------------------------------------------------------------------------------------------------------|-------------------------------------------------------------------------------------------------------------------------------------------------------------------------------------------------|------|-----------------------------------------------------|
| Lin Y.-T.; Lin Y.-T.J.                                                                                                                   | Survey of comprehensive restorative treatment for children under general anesthesia                                                                                                             | 2015 | Journal of Dental Sciences                          |
| Wisniewski J.F., Norooz S., Callahan D., Mohajeri A.                                                                                     | Survey of Vital Pulp Therapy Treatment in Permanent Dentition Being Taught at U.S. Dental Schools                                                                                               | 2022 | Journal of endodontics                              |
| Xie Y.; Wang Y.; Ma Q.; Li J.; Chen Y.; Yang R.; Huang R.; Zhang Q.; Zou J.                                                              | Survival analysis of pulpectomy in primary molars performed under dental general anaesthesia: a two-year retrospective study                                                                    | 2022 | BMC Oral Health                                     |
| Campagna P, Pinto LT, Lenzi TL, Ardenghi TM, de Oliveira Rocha R, Oliveira MDM.                                                          | Survival and Associated Risk Factors of Composite Restorations in Children with Early Childhood Caries: A Clinical Retrospective Study                                                          | 2018 | Pediatr Dent                                        |
| Pedano M.S.; Li X.; Jeanneau C.; Ghosh M.; Yoshihara K.; Van Landuyt K.; About I.; Van Meerbeek B.                                       | Survival of human dental pulp cells after 4-week culture in human tooth model                                                                                                                   | 2019 | Journal of Dentistry                                |
| Tseveenjav B, Furuholm J, Mulic A, Valen H, Maisala T, Turunen S, Varsio S, Auero M, Tjäderhane L.                                       | Survival of primary molars with pulpotomy interventions: public oral health practice-based study in Helsinki                                                                                    | 2021 | Acta Odontol Scand                                  |
| Yoshino K, Ito K, Kuroda M, Sugihara N.                                                                                                  | Survival Rate of 3-unit Fixed Partial Dentures Replacing First Molars: A Retrospective Cohort Study                                                                                             | 2023 | Bull Tokyo Dent Coll                                |
| Strbac G.D., Giannis K., Mittlböck M., Fuerst G., Zechner W., Stavropoulos A., Ulm C.                                                    | Survival rate of autotransplanted teeth after 5 years – A retrospective cohort study                                                                                                            | 2017 | Journal of Cranio-Maxillofacial Surgery             |
| Abanto J.; Olegário I.C.; Mendes F.M.; Bönecker M.J.S.; Pires Corrêa M.S.N.                                                              | Survival rate of pulpectomy in primary teeth using Feapex® paste: A clinical study in infants; Sobrevida de pulpectomia em dentes decíduos utilizando pasta Feapex®: Um estudo clínico em bebês | 2021 | Brazilian Dental Science                            |
| Al-Hijazi A.Y.; Al-Khafaji L.K.; Raheem N.N.                                                                                             | Syndecan-4 and alkaline phosphatase enhancement by local application of exogenous growth factors on traumatic pulp of osteoporotic rats: Immuno-histochemical analysis                          | 2020 | International Journal of Pharmaceutical Research    |
| Howard J.; Gardner L.; Saifee Z.; Geleil A.; Nelson I.; Colombo J.S.; Naleway S.E.; Carlson K.                                           | Synthesis and characterization of novel calcium phosphate glass-derived cements for vital pulp therapy                                                                                          | 2020 | Journal of Materials Science: Materials in Medicine |
| Alipour M.; Fadakar S.; Aghazadeh M.; Salehi R.; Samadi Kafil H.; Roshangar L.; Mousavi E.; Aghazadeh Z.                                 | Synthesis, characterization, and evaluation of curcumin-loaded endodontic reparative material                                                                                                   | 2021 | Journal of Biochemical and Molecular Toxicology     |
| Wang J.; Zuzzio K.; Walker C.L.                                                                                                          | Systemic dental pulp stem cell secretome therapy in a mouse model of amyotrophic lateral sclerosis                                                                                              | 2019 | Brain Sciences                                      |
| Butt R.; Aspinall A.; Tanday A.; Brown C.J.                                                                                              | Talon Cusp Management: A Case Series                                                                                                                                                            | 2022 | Dental Update                                       |
| Mohan R.P.S.; Verma S.; Agarwal N.; Singh U.                                                                                             | Taurodontism                                                                                                                                                                                    | 2013 | BMJ Case Reports                                    |
| Li Y, Jiang X, Hao J, Zhang Y, Huang R.                                                                                                  | Tea polyphenols: application in the control of oral microorganism infectious diseases                                                                                                           | 2019 | Arch Oral Biol                                      |
| Hincapié S.; Fuks A.; Mora I.; Bautista G.; Socarras F.                                                                                  | Teaching and practical guidelines in pulp therapy in primary teeth in Colombia - South America                                                                                                  | 2015 | International Journal of Paediatric Dentistry       |
| Chhay S, Nguyen C.                                                                                                                       | Techniques for Preserving Pulp Vitality in an Asymptomatic Deep Carious Lesion: A Clinical Case Study                                                                                           | 2022 | Compend Contin Educ Dent                            |
| Vacchiano V.; Frattaruolo N.; Mancinelli L.; Foschi M.; Carotenuto A.; Scandellari C.; Piattelli M.; Brescia Morra V.; Lugaresi A.       | Teeth loss after teriflunomide treatment: Casual or causal? A short case series                                                                                                                 | 2018 | Multiple Sclerosis and Related Disorders            |
| Shruthi C.S., Poojya R., Ram S., Anupama                                                                                                 | Telescopic overdenture: A case report                                                                                                                                                           | 2017 | International Journal of Biomedical Science         |
| Yilmaz Y.; Keles S.; Mete A.                                                                                                             | Temperature changes in the pulpal chamber and the sealing performance of various methods of direct pulp capping of primary teeth                                                                | 2013 | European Journal of Paediatric Dentistry            |
| Jamshidy L., Parvaz A.                                                                                                                   | Tensile Strength of non-precious gold, cobalt-chromium, and fiber Posts cemented with panavia F2 resin cement in root canals of endodontically-treated teeth                                    | 2020 | Pakistan Journal of Medical and Health Sciences     |
| Feitosa V.P.; Mota M.N.; Savoldi R.; Rifane T.; de Paula D.; Borges L.; Solheiro L.K.; Aguiar Neto M.; Vieira L.; Moreira A.C.; Sauro S. | The Allogenic Dental Pulp Transplantation from Son/Daughter to Mother/Father: A Follow-Up of Three Clinical Cases                                                                               | 2022 | Bioengineering                                      |
| Ko Y.-J.; Kwon K.-Y.; Kum K.-Y.; Lee W.-C.; Baek S.-H.; Kang M.K.; Shon W.-J.                                                            | The Anti-Inflammatory Effect of Human Telomerase-Derived Peptide on P. gingivalis Lipopolysaccharide-Induced                                                                                    | 2015 | Mediators of Inflammation                           |

|                                                                                                                                                                                                                    |                                                                                                                                                                                               |      |                                               |
|--------------------------------------------------------------------------------------------------------------------------------------------------------------------------------------------------------------------|-----------------------------------------------------------------------------------------------------------------------------------------------------------------------------------------------|------|-----------------------------------------------|
|                                                                                                                                                                                                                    | Inflammatory Cytokine Production and Its Mechanism in Human Dental Pulp Cells                                                                                                                 |      |                                               |
| Eba H.; Murasawa Y.; Iohara K.; Isogai Z.; Nakamura H.; Nakamura H.; Nakashima M.                                                                                                                                  | The Anti-Inflammatory Effects of Matrix Metalloproteinase-3 on Irreversible Pulpitis of Mature Erupted Teeth                                                                                  | 2012 | PLoS ONE                                      |
| Jurič I.B.; Plečko V.; Pandurić D.G.; Anić I.                                                                                                                                                                      | The antimicrobial effectiveness of photodynamic therapy used as an addition to the conventional endodontic re-treatment: A clinical study                                                     | 2014 | Photodiagnosis and Photodynamic Therapy       |
| Siqueira J.F., Jr.; Antunes H.S.; Pérez A.R.; Alves F.R.F.; Mdala I.; Silva E.J.N.L.; Belladonna F.G.; Rôças I.N.                                                                                                  | The Apical Root Canal System of Teeth with Posttreatment Apical Periodontitis: Correlating Microbiologic, Tomographic, and Histopathologic Findings                                           | 2020 | Journal of Endodontics                        |
| Chen Y, Ma Y, Yang X, Chen J, Yang B, Tian W.                                                                                                                                                                      | The Application of Pulp Tissue Derived-Exosomes in Pulp Regeneration: A Novel Cell-Homing Approach                                                                                            | 2022 | Int J Nanomedicine                            |
| Ptak D.M.; Finkelman M.D.; Amato R.B.                                                                                                                                                                              | The Association between Choice of Diagnostic Imaging Modality and Long-term Treatment Outcomes for Patients Undergoing Nonsurgical Root Canal Treatment on Maxillary First Molars             | 2021 | Journal of Endodontics                        |
| Petersen J.; Glaßl E.-M.; Nasseri P.; Crismani A.; Luger A.K.; Schoenherr E.; Bertl K.; Glodny B.                                                                                                                  | The association of chronic apical periodontitis and endodontic therapy with atherosclerosis                                                                                                   | 2014 | Clinical Oral Investigations                  |
| Özverel C.S.; Islam A.; Yllmaz H.G.                                                                                                                                                                                | The biostimulative effectiveness of photobiomodulation therapy application on thawed dental pulp stem cells                                                                                   | 2021 | Journal of Innovative Optical Health Sciences |
| Bani M.; Aktaş N.; Çinar Ç.; Odabaş M.E.                                                                                                                                                                           | The clinical and radiographic success of primary molar pulpotomy using biodentine" and mineral trioxide aggregate: A 24-month randomized clinical trial                                       | 2017 | Pediatric Dentistry                           |
| Jia L.; Zhang X.; Shi H.; Li T.; Lv B.; Xie M.                                                                                                                                                                     | The clinical effectiveness of calcium hydroxide in root canal disinfection of primary teeth: A meta-analysis                                                                                  | 2019 | Medical Science Monitor                       |
| Consolaro A.; Cardoso M.A.; De Almeida C.D.C.M.; Souza I.A.O.; Filho L.C.                                                                                                                                          | The clinical meaning of external cervical resorption in maxillary canine: Transoperative dental trauma                                                                                        | 2014 | Dental Press Journal of Orthodontics          |
| Moradi Eslami L.; Vatanpour M.; Aminzadeh N.; Mehrvarzfar P.; Taheri S.                                                                                                                                            | The comparison of intracanal medicaments, diode laser and photodynamic therapy on removing the biofilm of Enterococcus faecalis and Candida albicans in the root canal system (ex-vivo study) | 2019 | Photodiagnosis and Photodynamic Therapy       |
| Sobral A.P.T., Santos E.M., Aranha A.C., Soares P.V., Moriyama C.M., Gonçalves M.L.L., Ribeiro R.A., Motta L.J., Horliana A.C.R.T., Fernandes K.P.S., Mesquita-Ferrari R.A., Bussadori S.K.                        | The control of pain due to dentin hypersensitivity in individuals with molar-incisor hypomineralisation: a protocol for a randomised controlled clinical trial                                | 2021 | BMJ Open                                      |
| Khosrozadeh M.; Ghadimi S.; Kazemzadeh Gharghabi M.; Kharrazifard M.J.; Hamrah M.H.; Baghalian A.                                                                                                                  | The Correlation between Children's Intelligence Quotient and Their Behavior in Dental Setting: A Cross-Sectional Study                                                                        | 2022 | BioMed Research International                 |
| Friedman M.E.; Quiñonez C.; Barrett E.J.; Boutis K.; Casas M.J.                                                                                                                                                    | The Cost of Treating Caries-Related Complaints at a Children's Hospital Emergency Department                                                                                                  | 2018 | Journal (Canadian Dental Association)         |
| Kunert M.; Rozpedek-Kaminska W.; Galita G.; Sauro S.; Bourgi R.; Hardan L.; Majsterek I.; Lukomska-Szymanska M.                                                                                                    | The Cytotoxicity and Genotoxicity of Bioactive Dental Materials                                                                                                                               | 2022 | Cells                                         |
| Kopke S, Angrisani N, Staszyc C.                                                                                                                                                                                   | The dental cavities of equine cheek teeth: three-dimensional reconstructions based on high resolution micro-computed tomography                                                               | 2012 | BMC Vet Res                                   |
| Almanea S.M.; Alhadlaq M.A.; Albuqmi N.M.; Algomaiz S.S.                                                                                                                                                           | The Dental Management of Pediatric Patient Diagnosed with Myasthenia Gravis: A Case Report                                                                                                    | 2022 | European Journal of Dentistry                 |
| Wu Q.; Li S.; Li R.; Chen X.; Guo L.; Zheng Y.                                                                                                                                                                     | The detection of pro-inflammatory cytokines in exudates from dental pulp tissues                                                                                                              | 2022 | Cytokine                                      |
| Zhang M.; Kokabu S.; Nakatomi C.; Sugiyama G.; Matsuo K.; Jimi E.                                                                                                                                                  | The Distinct Distributions of Immunocompetent Cells in Rat Dentin Pulp After Pulpotomy                                                                                                        | 2015 | Anatomical Record                             |
| Costa-Santos L.; Silva-Junior Z.S.; Sfalcin R.A.; da Mota A.C.C.; Tempestini Horliana A.C.R.; Motta L.J.; Mesquita-Ferrari R.A.; Santos Fernandes K.P.; Prates R.A.; Teixeira Silva D.F.; Deana A.; Bussadori S.K. | The effect of antimicrobial photodynamic therapy on infected dentin in primary teeth                                                                                                          | 2019 | Medicine (United States)                      |

|                                                                                                        |                                                                                                                                                                                         |      |                                                                   |
|--------------------------------------------------------------------------------------------------------|-----------------------------------------------------------------------------------------------------------------------------------------------------------------------------------------|------|-------------------------------------------------------------------|
| Üstün Y., Topçuoğlu H.S., Akpek F., Aslan T.                                                           | The effect of blood contamination on dislocation resistance of different endodontic reparative materials                                                                                | 2015 | Journal of oral science                                           |
| Khdairah H.R.; Al-Gharrawi H.A.                                                                        | The effect of canal preparation using 2shape, protaper gold and protaper next file systems on the fracture resistance of obturated roots                                                | 2020 | Journal of International Dental and Medical Research              |
| Abada H.M.; Hashem A.A.R.; Abu-Seida A.M.; Nagy M.M.                                                   | The effect of changing apical foramen diameter on regenerative potential of mature teeth with necrotic pulp and apical periodontitis                                                    | 2022 | Clinical Oral Investigations                                      |
| Kalogeropoulos K., Xiropotamou A., Koletsi D., Tzanetakis G.N.                                         | The Effect of Cone-Beam Computed Tomography (CBCT) Evaluation on Treatment Planning after Endodontic Instrument Fracture                                                                | 2022 | International Journal of Environmental Research and Public Health |
| Cintra L.T.A.; Ferreira L.L.; Benetti F.; Gastélum A.A.; Gomes-Filho J.E.; Ervolino E.; Briso A.L.F.   | The effect of dental bleaching on pulpal tissue response in a diabetic animal model                                                                                                     | 2017 | International Endodontic Journal                                  |
| Stefanovic V.; Taso E.; Kanjevac T.; Abazovic D.; Rakic M.; Petkovic-Curcin A.; Acovic A.; Vojvodic D. | The effect of dental caries and restorative biomaterials on IL-1 $\beta$ and TNF- $\alpha$ levels in the gingival crevicular fluid                                                      | 2021 | Vojnosanitetski Pregled                                           |
| Oliveira D, Rocha MG, Zoidis P, Pereira P, Ribeiro AP.                                                 | The effect of different pulp capping methods on the intrapulpal temperature when using light-cured procedures                                                                           | 2022 | J Clin Exp Dent                                                   |
| Omidi S.; Bagheri M.; Fazli M.; Ahmadiankia N.                                                         | The effect of different pulp-capping materials on proliferation, migration and cytokine secretion of human dental pulp stem cells                                                       | 2020 | Iranian Journal of Basic Medical Sciences                         |
| Akashi Y.; Nemoto A.; Nakajima K.; Kokubun K.; Murakami S.; Inoue T.; Matsuzaka K.                     | The effect of fibroblast growth factor 7 on human dental pulp stem cells for differentiation to AQP5-positive and $\alpha$ SMA-positive cells in vitro and in vivo                      | 2021 | Clinical and Experimental Dental Research                         |
| Zaen El-Din A.M.; Hamama H.H.; Abo El-Elaa M.A.; Grawish M.E.; Mahmoud S.H.; Neelakantan P.            | The effect of four materials on direct pulp capping: An animal study                                                                                                                    | 2020 | Australian Endodontic Journal                                     |
| El-Meligy O., Maashi M., Al-Mushayt A., Al-Nowaiser A., Al-Mubark S.                                   | The Effect of Full-Mouth Rehabilitation on Oral Health-Related Quality of Life for Children with Special Health Care Needs                                                              | 2016 | The Journal of clinical pediatric dentistry                       |
| Ahmadian E, Eftekhari A, Dizaj SM, Sharifi S, Mokhtarpour M, Nasibova AN, Khalilov R, Samiei M.        | The effect of hyaluronic acid hydrogels on dental pulp stem cells behavior                                                                                                              | 2019 | Int J Biol Macromol                                               |
| Veličkovic Z.; Živkovic D.; Bubalo M.; Živkovic M.; Mitic A.; Miladinovic M.; Duka M.; Lazic D.        | The effect of hydroxyapatite and growth factors on reparative dentine formation in the therapy of injured pulp                                                                          | 2021 | Vojnosanitetski Pregled                                           |
| Akhlaghi N., Azarshab M., Akhoundi N., Meraji N.                                                       | The effect of ketorolac buccal infiltration on postoperative endodontic pain: A prospective, double-blind, randomized, controlled clinical trial                                        | 2019 | Quintessence International                                        |
| Fekrazad R.; Seraj B.; Ghadimi S.; Dehghan M.-M.                                                       | The effect of low-level laser therapy (810 nm) on root development of immature permanent teeth in dogs                                                                                  | 2015 | Lasers in Medical Science                                         |
| Asnaashari M.; Shojaeian S.; Mesgharani A.; Mehrabinia P.                                              | The Effect of Low-Level Laser Therapy on the Viability of Human Dental Pulp Stem Cells                                                                                                  | 2022 | Journal of Lasers in Medical Sciences                             |
| Moradi Askari E, Parirokh M, Nakhaee N, Hosseini HR, Abbott PV.                                        | The Effect of Maxillary First Molar Root Length on the Success Rate of Buccal Infiltration Anesthesia                                                                                   | 2016 | J Endod                                                           |
| Tahira T.; Jouhar R.; Ghani H.; Ahmed N.; Rao A.; Jamil S.                                             | The effect of mineral trioxide aggregate as a direct pulp capping agent in permanent teeth                                                                                              | 2018 | Journal of International Oral Health                              |
| Bshara N.G.; Ataya J.                                                                                  | The effect of naocl gel activated by ultrasonic device on bovine dental pulp dissolution: An in vitro study                                                                             | 2020 | Journal of Stomatology                                            |
| Kong Q.; Liu L.; Huang Y.; Zhang F.; Wei X.; Ling J.                                                   | The effect of octamer-binding transcription factor 4B1 on microRNA signals in human dental pulp cells with inflammatory response                                                        | 2014 | Journal of Endodontics                                            |
| Keles S., Kocaturk O.                                                                                  | The Effect of Oral Dexmedetomidine Premedication on Preoperative Cooperation and Emergence Delirium in Children Undergoing Dental Procedures                                            | 2017 | BioMed Research International                                     |
| Ashraf A., Hussein W., Hashem A., Soliman A.                                                           | The Effect of Passive Ultrasonic Irrigation and XP-Endo Finisher on Post-operative Pain after Endodontic Retreatment on Patients (Randomized Controlled Clinical Trial)                 | 2022 | Open Access Macedonian Journal of Medical Sciences                |
| Elsaka S., Hussein W., Hashem A., Soliman A.                                                           | The Effect of Passive Ultrasonic Irrigation or XP-Endo Finisher on Post-Operative Pain in Patients with Necrotic Teeth with Apical Periodontitis (Randomized Controlled Clinical Trial) | 2022 | Open Access Macedonian Journal of Medical Sciences                |
| Alves-Silva E.G.; Arruda-Vasconcelos R.; Louzada L.M.; de-Jesus-Soares A.;                             | The effect of photodynamic therapy on postoperative pain in teeth with primary endodontic infection                                                                                     | 2022 | Photodiagnosis and Photodynamic Therapy                           |



|                                                                                                                   |                                                                                                                                                                                                                                           |      |                                                      |
|-------------------------------------------------------------------------------------------------------------------|-------------------------------------------------------------------------------------------------------------------------------------------------------------------------------------------------------------------------------------------|------|------------------------------------------------------|
| Ferraz C.C.R.; Almeida J.F.A.; Marciano M.A.; Steiner-Oliveira C.; Bello-Silva M.S.; Shemesh H.; Gomes B.P.F.D.A. |                                                                                                                                                                                                                                           |      |                                                      |
| Hsu C.-L.; Lin W.-S.; Lin C.-H.; Liu J.                                                                           | The effect of professional fluoride application program for preschool children in Taiwan: An analysis using the National Health Insurance Research Database (NHIRD)                                                                       | 2018 | Journal of Dental Sciences                           |
| van der Weijden F.N.; Hesse D.; Americano G.C.A.; Soviero V.M.; Bonifacio C.C.                                    | The effect of pulp inflammation and premature extraction of primary molars on the successor permanent teeth. A retrospective study                                                                                                        | 2020 | International Journal of Paediatric Dentistry        |
| Akcay M, Sari S.                                                                                                  | The effect of sodium hypochlorite application on the success of calcium hydroxide and mineral trioxide aggregate pulpotomies in primary teeth                                                                                             | 2014 | Pediatr Dent                                         |
| Ozlek E.; Gunduz H.; Kadi G.; Taşan A.; Akkol E.                                                                  | The effect of solution and gel forms of sodium hypochlorite on postoperative pain: A randomized clinical trial                                                                                                                            | 2021 | Journal of Applied Oral Science                      |
| Gümüş H.; Delikan E.                                                                                              | The effect of sonic activation of irrigant on postoperative pain after root canal treatment in primary molar teeth: a randomized, clinical study                                                                                          | 2020 | Clinical Oral Investigations                         |
| Yavari H.R.; Jafari F.; Jamloo H.; Hallaj-Nezhadi S.; Jafari S.                                                   | The Effect of Submucosal Injection of Corticosteroids on Pain Perception and Quality of Life after Root Canal Treatment of Teeth with Irreversible Pulpitis: A Randomized Clinical Trial                                                  | 2019 | Journal of Endodontics                               |
| Khalighinejad N, Aminoshariae A, Kulild JC, Williams KA, Wang J, Mickel A.                                        | The Effect of the Dental Operating Microscope on the Outcome of Nonsurgical Root Canal Treatment: A Retrospective Case-control Study                                                                                                      | 2017 | J Endod                                              |
| Li J.-Y.; Wang S.-N.; Dong Y.-M.                                                                                  | The effect of topical application of meloxicam on inflamed dental pulp                                                                                                                                                                    | 2021 | Journal of Dental Sciences                           |
| Drukteinis S., Bilvinaite G., Shemesh H., Tusas P., Peculiene V.                                                  | The effect of ultrasonic agitation on the porosity distribution in apically perforated root canals filled with different bioceramic materials and techniques: A micro-ct assessment                                                       | 2021 | Journal of Clinical Medicine                         |
| Dawood A.E.; Manton D.J.; Parashos P.; Wong R.H.                                                                  | The effect of working time on the displacement of Biodentine™ beneath prefabricated stainless steel crown: a laboratory study                                                                                                             | 2016 | Journal of investigative and clinical dentistry      |
| Dou L.; Luo J.; Yang D.; Wang Y.                                                                                  | The effectiveness of an additional lingual infiltration in the pulpal anesthesia of mandibular teeth: A systematic review                                                                                                                 | 2013 | Quintessence International                           |
| Oliveira LSJ, de Bragança RMF, Sarkis-Onofre R, Faria-E-Silva AL.                                                 | The effectiveness of the supplementary use of the XP-endo Finisher on bacteria content reduction: a systematic review and meta-analysis                                                                                                   | 2021 | Restor Dent Endod                                    |
| Tüfenkçi P., Yılmaz K.                                                                                            | The Effects of Different Endodontic Access Cavity Design and Using XP-endo Finisher on the Reduction of Enterococcus faecalis in the Root Canal System                                                                                    | 2020 | Journal of endodontics                               |
| Li D, Fu L, Zhang Y, Yu Q, Ma F, Wang Z, Luo Z, Zhou Z, Cooper PR, He W.                                          | The effects of LPS on adhesion and migration of human dental pulp stem cells in vitro                                                                                                                                                     | 2014 | J Dent                                               |
| Coelho M.S.; Vilas-Boas L.; Tawil P.Z.                                                                            | The effects of photodynamic therapy on postoperative pain in teeth with necrotic pulps                                                                                                                                                    | 2019 | Photodiagnosis and Photodynamic Therapy              |
| Zhang M.; Jiang F.; Zhang X.; Wang S.; Jin Y.; Zhang W.; Jiang X.                                                 | The Effects of Platelet-Derived Growth Factor-BB on Human Dental Pulp Stem Cells Mediated Dentin-Pulp Complex Regeneration                                                                                                                | 2017 | Stem Cells Translational Medicine                    |
| Diananda; Kamizar; Margono A.; Asrianti D.; Meydiawati R.                                                         | The efficacy of advanced platelet-rich fibrin (a-prf) on fibroblast cell regeneration                                                                                                                                                     | 2017 | Journal of International Dental and Medical Research |
| Maljaei E.; Pourkazemi M.; Ghanizadeh M.; Ranjbar R.                                                              | The efficacy of buccal infiltration of 4% articaine and psa injection of 2% lidocaine on anesthesia of maxillary second molars                                                                                                            | 2017 | Iranian Endodontic Journal                           |
| Makeeva IM, Volkov AG, Prikuls VF, Dikopova NZ, Arakelyan MG, Makeeva MK, Ruchkin DN.                             | The efficacy of electroodontodiagnosis by means of various types of current                                                                                                                                                               | 2018 | Stomatologiya (Mosk)                                 |
| King E.M.; Cerajewska T.L.; Locke M.; Claydon N.C.A.; Davies M.; West N.X.                                        | The Efficacy of Plasma Rich in Growth Factors for the Treatment of Alveolar Osteitis: A Randomized Controlled Trial                                                                                                                       | 2018 | Journal of Oral and Maxillofacial Surgery            |
| Marsa R.D.; Asrianti D.; Margono A.                                                                               | The efficacy of platelet-rich fibrin lysate (PRF-L) for fibroblast cell proliferation                                                                                                                                                     | 2017 | Journal of International Dental and Medical Research |
| Ramachandran A, Khan SI, Mohanavelu D, Kumar KS.                                                                  | The efficacy of pre-operative oral medication of paracetamol, ibuprofen, and aceclofenac on the success of maxillary infiltration anesthesia in patients with irreversible pulpitis: A double-blind, randomized controlled clinical trial | 2012 | J Conserv Dent                                       |

|                                                                                                      |                                                                                                                                                                   |      |                                                                   |
|------------------------------------------------------------------------------------------------------|-------------------------------------------------------------------------------------------------------------------------------------------------------------------|------|-------------------------------------------------------------------|
| Kaiwar A.; Usha H.; Meena N.; Ashwini P.; Murthy C.                                                  | The efficiency of root canal disinfection using a diode laser: In vitro study                                                                                     | 2013 | Indian Journal of Dental Research                                 |
| Roßgardt J, Heilen LB, Büttner K, Dern-Wieloch J, Vogelsberg J, Staszuk C.                           | The Equine Dental Pulp: Histomorphometric Analysis of the Equine Dental Pulp in Incisors and Cheek Teeth                                                          | 2022 | Vet Sci                                                           |
| Pourhajibagher M.; Ghorbanzadeh R.; Parker S.; Chiniforush N.; Bahador A.                            | The evaluation of cultivable microbiota profile in patients with secondary endodontic infection before and after photo-activated disinfection                     | 2017 | Photodiagnosis and Photodynamic Therapy                           |
| Çelik B.N., Mutluay M.S., Arıkan V., Sarı Ş.                                                         | The evaluation of MTA and Biodentine as a pulpotomy materials for carious exposures in primary teeth                                                              | 2019 | Clinical oral investigations                                      |
| Trope M.                                                                                             | The expanding role of vital pulp therapy                                                                                                                          | 2016 | Dentistry Today                                                   |
| Grzeczko A, Granicka LH, Maciejewska I, Strawski M, Szklarczyk M, Borkowska M.                       | The Experimental Study of the Performance of Nano-Thin Polyelectrolyte Shell for Dental Pulp Stem Cells Immobilization                                            | 2015 | J Nanosci Nanotechnol                                             |
| Cho Y.S.; Kim Y.S.; Moozhayil S.J.; Yang E.S.; Bae Y.C.                                              | The expression of hyperpolarization-activated cyclic nucleotide-gated channel 1 (HCN1) and HCN2 in the rat trigeminal ganglion, sensory root, and dental pulp     | 2015 | Neuroscience                                                      |
| Liu L, Peng B.                                                                                       | The expression of macrophage migration inhibitory factor is correlated with receptor activator of nuclear factor kappa B ligand in induced rat periapical lesions | 2013 | J Endod                                                           |
| Ismiyatin K.; Wahlujo S.; Soetjo A.; Rahayu R.; Utomo H.; Anindya C.                                 | The expression of pulpal substance P after dentinal application of Escherichia coli lipopolysaccharide                                                            | 2019 | Saudi Endodontic Journal                                          |
| Xing S, Martín-Torres M, Bermúdez de Castro JM.                                                      | The fossil teeth of the Peking Man                                                                                                                                | 2018 | Sci Rep                                                           |
| Wang S.-M.; Lee C.-H.; Lin C.-H.; Chen G.-S.; Liu J.-C.; Li C.-H.                                    | The growth of dental pulp stem cells in portland cement micro-environment                                                                                         | 2015 | Journal of Medical Sciences (Taiwan)                              |
| Fontana M, Gooch BF, Junger ML.                                                                      | The Hall technique may be an effective treatment modality for caries in primary molars                                                                            | 2012 | J Evid Based Dent Pract                                           |
| Abuqaroub D.; Aslam N.; Zaza R.; Jafar H.; Zalloum S.; Atoom R.; Alshaer W.; Al-Mrahleh M.; Awidi A. | The Immunomodulatory and Regenerative Effect of Biodentine™ on Human THP-1 Cells and Dental Pulp Stem Cells: In Vitro Study                                       | 2022 | BioMed Research International                                     |
| Sinjari B.; Rexhepi I.; Santilli M.; D'addazio G.; Chiacchiaretta P.; Di Carlo P.; Caputi S.         | The impact of covid-19 related lockdown on dental practice in central Italy—outcomes of a survey                                                                  | 2020 | International Journal of Environmental Research and Public Health |
| Chang C.-T., Liu S.-P., Muo C.-H., Liao Y.-F., Chiu K.-M., Tsai C.-H., Huang Y.-F.                   | The impact of dental therapy timelines and irradiation dosages on osteoradionecrosis in oral cancer patients: A population-based cohort study                     | 2022 | Oral Oncology                                                     |
| Moca A.E.; Țig I.A.; Ciavoi G.; Iurcov R.; Șipoș L.R.; Todor L.                                      | The Impact of the COVID-19 Pandemic on the Dental Emergency Service from Oradea, Romania: A Retrospective Study                                                   | 2022 | Healthcare (Switzerland)                                          |
| Bolette A., Truong S., Guéders A., Geerts S.                                                         | The importance of pulp therapy in deciduous teeth                                                                                                                 | 2016 | Revue Medicale de Liege                                           |
| Kallel I.; Douki N.; Amaidi S.; Ben Amor F.                                                          | The Incidence of Complications of Dental Trauma and Associated Factors: A Retrospective Study                                                                     | 2020 | International Journal of Dentistry                                |
| Tian X.; Liu C.; Wang Z.                                                                             | The induction of inflammation by the cGAS-STING pathway in human dental pulp cells: A laboratory investigation                                                    | 2022 | International Endodontic Journal                                  |
| Petrović V.; Pejčić N.; Čakić S.                                                                     | The influence of different therapeutic modalities and platelet rich plasma on apexogenesis - A preliminary study in monkeys                                       | 2013 | Advances in Clinical and Experimental Medicine                    |
| Marek E.; Łagocka R.; Kot K.; Woźniak K.; Lipski M.                                                  | The influence of two forms of chlorhexidine on the accuracy of contemporary electronic apex locators                                                              | 2019 | BMC Oral Health                                                   |
| Chen D., Yue H., Liu S., Meng L., Yin W.                                                             | The introduction of team-based learning into the clinical pharmacology section of the endodontics clinical course                                                 | 2022 | Clinical and Experimental Pharmacology and Physiology             |
| Doumani M.; Almutairi S.T.; Alshammari N.T.T.; Alshami A.N.; Alharbi A.S.; Habib A.                  | The knowledge about vital pulp therapy of permanent teeth among Saudi internship dentists and dental students                                                     | 2020 | Saudi Endodontic Journal                                          |
| Edwards D, Bailey O, Stone S, Duncan H.                                                              | The management of deep caries in UK primary care: A nationwide questionnaire-based study                                                                          | 2021 | Int Endod J                                                       |
| Careddu R, Plotino G, Cotti E, Duncan HF.                                                            | The management of deep carious lesions and the exposed pulp amongst members of two European endodontic societies: a questionnaire-based study                     | 2021 | Int Endod J                                                       |
| Beshkenadze E.; Chipashvili N.                                                                       | The maxillary second molar - anatomical variations (case report)                                                                                                  | 2015 | Georgian medical news                                             |

|                                                                                                                                                                                           |                                                                                                                                                                                                             |      |                                                  |
|-------------------------------------------------------------------------------------------------------------------------------------------------------------------------------------------|-------------------------------------------------------------------------------------------------------------------------------------------------------------------------------------------------------------|------|--------------------------------------------------|
| Sun P.; Guo Z.; Guo D.; Wang J.; Wu T.; Li T.; Liu J.; Liu X.                                                                                                                             | The Microbiota Profile Analysis of Combined Periodontal-Endodontic Lesions Using 16S rRNA Next-Generation Sequencing                                                                                        | 2021 | Journal of Immunology Research                   |
| Zanolli C, Martínón-Torres M, Bernardini F, Boschian G, Coppa A, Dreossi D, Mancini L, Martínez de Pinillos M, Martín-Francés L, Bermúdez de Castro JM, Tozzi C, Tuniz C, Macchiarelli R. | The Middle Pleistocene (MIS 12) human dental remains from Fontana Ranuccio (Latium) and Visogliano (Friuli-Venezia Giulia), Italy. A comparative high resolution endostructural assessment                  | 2018 | PLoS One                                         |
| Acharya N., Humagain R., Dahal S., Kafle D.                                                                                                                                               | The Need of Endodontic Therapy among Patients Attending Tertiary Care Center in Central Nepal                                                                                                               | 2022 | Kathmandu University Medical Journal             |
| Cintra L.T.A.; Benetti F.; Da Silva Facundo A.C.; Ferreira L.L.; Gomes-Filho J.E.; Ervolino E.; Rahal V.; Briso A.L.F.                                                                    | The number of bleaching sessions influences pulp tissue damage in rat teeth                                                                                                                                 | 2013 | Journal of Endodontics                           |
| Ye L, Liu L, Deng M, Liu N, Wu X, Dong Z.                                                                                                                                                 | The observation of surface morphology of enamel and temperature of dental pulp cavity in vitro after irradiated by Er:YAG laser                                                                             | 2012 | Hua Xi Kou Qiang Yi Xue Za Zhi                   |
| Heidari E, Andiappan M, Banerjee A, Newton JT.                                                                                                                                            | The oral health of individuals with dental phobia: a multivariate analysis of the Adult Dental Health Survey, 2009                                                                                          | 2017 | Br Dent J                                        |
| Castagnola R.; Minciocchi I.; Rupe C.; Marigo L.; Grande N.M.; Contaldo M.; Pesce A.; Lajolo C.                                                                                           | The Outcome of Primary Root Canal Treatment in Postirradiated Patients: A Case Series                                                                                                                       | 2020 | Journal of Endodontics                           |
| Vu H.T.; Yoon J.-Y.; Park J.-H.; Lee H.-H.; Dashnyam K.; Kim H.-W.; Lee J.-H.; Shin J.-S.; Kim J.-B.                                                                                      | The Potential Application of Human Gingival Fibroblast-Conditioned Media in Pulp Regeneration: An In Vitro Study                                                                                            | 2022 | Cells                                            |
| Elline E.; Ismiyatin K.; Indah Budhy T.; Bhardwaj A.                                                                                                                                      | The potential of eggshell hydroxyapatite, collagen, and EGCG (HAp-Col-EGCG) scaffold as a pulp regeneration material                                                                                        | 2022 | Saudi Dental Journal                             |
| Dou L.; Vanschaayk M.M.; Zhang Y.; Fu X.; Ji P.; Yang D.                                                                                                                                  | The prevalence of dental anxiety and its association with pain and other variables among adult patients with irreversible pulpitis                                                                          | 2018 | BMC Oral Health                                  |
| Verzak Z, Celap B, Modrić VE, Sorić P, Karlović Z.                                                                                                                                        | The prevalence of idiopathic osteosclerosis and condensing osteitis in Zagreb population                                                                                                                    | 2012 | Acta Clin Croat                                  |
| Zhang P.; Cui Z.; Li S.                                                                                                                                                                   | The protective effects of S14G-humanin (HNG) against lipopolysaccharide (LPS)- induced inflammatory response in human dental pulp cells (hDPCs) mediated by the TLR4/MyD88/NF-κB pathway                    | 2021 | Bioengineered                                    |
| Guo X.; Chen J.                                                                                                                                                                           | The protective effects of saxagliptin against lipopolysaccharide (LPS)-induced inflammation and damage in human dental pulp cells                                                                           | 2019 | Artificial Cells, Nanomedicine and Biotechnology |
| Palatyńska-Ulatowska A, Fernandes MC, Pietrzycka K, Koprowicz A, Klimek L, Souza RA, Pradebon M, de Figueiredo JAP.                                                                       | The Pulp Stones: Morphological Analysis in Scanning Electron Microscopy and Spectroscopic Chemical Quantification                                                                                           | 2021 | Medicina (Kaunas)                                |
| Saito K.; Ohshima H.                                                                                                                                                                      | The putative role of insulin-like growth factor (IGF)-binding protein 5 independent of IGF in the maintenance of pulpal homeostasis in mice                                                                 | 2019 | Regenerative Therapy                             |
| Pustułka K.; Trzcionka A.; Dziedzic A.; Skaba D.; Tanasiewicz M.                                                                                                                          | The radiological assessment of root features and periodontal structures in endodontically treated teeth subjected to forces generated by fixed orthodontic appliances. A prospective, clinical cohort study | 2021 | Journal of Clinical Medicine                     |
| Abrami S.                                                                                                                                                                                 | The Radix Entomolaris: management of the distolingual root canal                                                                                                                                            | 2016 | Giornale Italiano di Endodonzia                  |
| Kwon SR, Wertz PW, Dawson DV, Cobb DS, Denehy G.                                                                                                                                          | The relationship of hydrogen peroxide exposure protocol to bleaching efficacy                                                                                                                               | 2013 | Oper Dent                                        |
| Kamal E.M.; Nabih S.M.; Obeid R.F.; Abdelhameed M.A.                                                                                                                                      | The reparative capacity of different bioactive dental materials for direct pulp capping; Zdolności reparacyjne bioaktywnych materiałów stosowanych w bezpośrednim pokryciu miazgi                           | 2018 | Dental and Medical Problems                      |
| Hara M, Horibe K, Mori H, Nakamura H.                                                                                                                                                     | The role of canonical Wnt signaling in dentin bridge formation                                                                                                                                              | 2021 | J Oral Biosci                                    |
| Tsai C.-L.; Hung S.-L.; Lee Y.-Y.; Ho Y.-C.; Yang S.-F.                                                                                                                                   | The role of fibroblasts in the modulation of dental pulp inflammation                                                                                                                                       | 2022 | Journal of the Formosan Medical Association      |

|                                                                                                      |                                                                                                                                                                                                      |      |                                                                        |
|------------------------------------------------------------------------------------------------------|------------------------------------------------------------------------------------------------------------------------------------------------------------------------------------------------------|------|------------------------------------------------------------------------|
| Irmaleny; Sitam S.; Pribadi S.; Dewi P.Y.                                                            | The Role of HBOT on Pulp Capping Treatment in Enhancing TGF- $\beta$ Levels: Scoping Review                                                                                                          | 2022 | Journal of International Dental and Medical Research                   |
| Zaky S.H.; Shehabeldin M.; Ray H.; Sfeir C.                                                          | The role of inflammation modulation in dental pulp regeneration                                                                                                                                      | 2021 | European Cells and Materials                                           |
| Choung HW, Lee JH, Lee DS, Choung PH, Park JC.                                                       | The role of preameloblast-conditioned medium in dental pulp regeneration                                                                                                                             | 2013 | J Mol Histol                                                           |
| Tscymbalystov A.V.; Kopytov A.A.; Kuzmina E.A.; Gontarev S.N.; Oganesyan A.A.                        | The study of destruction of the compositions restoring the dentition integrity under uniaxial tension                                                                                                | 2016 | International Journal of Pharmacy and Technology                       |
| Ludwig K.H.; Fontana M.; Vinson L.A.; Platt J.A.; Dean J.A.                                          | The success of stainless steel crowns placed with the Hall technique :A retrospective study                                                                                                          | 2014 | Journal of the American Dental Association                             |
| Ludwig KH, Fontana M, Vinson LA, Platt JA, Dean JA.                                                  | The success of stainless steel crowns placed with the Hall technique: a retrospective study                                                                                                          | 2014 | J Am Dent Assoc                                                        |
| Wu S.; Liu Y.; Zhang H.; Lei L.                                                                      | The Susceptibility to Calcium Hydroxide Modulated by the Essential walR Gene Reveals the Role for Enterococcus faecalis Biofilm Aggregation                                                          | 2019 | Journal of Endodontics                                                 |
| Monteiro J.; Ni Chaollai A.; Duggal M.                                                               | The teaching of management of the pulp in primary molars across Europe                                                                                                                               | 2017 | European Archives of Paediatric Dentistry                              |
| Pan J.; Wang J.; Hao L.; Zhu G.; Nguyen D.N.; Li Q.; Liu Y.; Zhao Z.; Li Y.-P.; Chen W.              | The Triple Functions of D2 Silencing in Treatment of Periapical Disease                                                                                                                              | 2017 | Journal of Endodontics                                                 |
| Janiszewska-Olszowska J, Socha A, Bińczak P.                                                         | The use of cortical screw anchorage for closing a space resulting from the loss of a lower molar--a case report                                                                                      | 2013 | Ann Acad Med Stetin                                                    |
| Garcez A.S.; Fregnani E.R.; Rodriguez H.M.; Nunez S.C.; Sabino C.P.; Suzuki H.; Ribeiro M.S.         | The use of optical fiber in endodontic photodynamic therapy. Is it really relevant?                                                                                                                  | 2013 | Lasers in Medical Science                                              |
| Bonsor S.J.                                                                                          | The use of the operating microscope in general dental practice. Part 2: If you can see it, you can treat it!                                                                                         | 2015 | Dental update                                                          |
| Doumani M.D.; Arnous W.A.; Alsafadi M.F.; Alnazer H.A.; Alanazi S.M.; Alotaibi K.S.; Al-Ammari A.I.  | The vital pulp therapy of permanent teeth: A dental practitioner's perspective from Saudi Arabia                                                                                                     | 2020 | Journal of International Society of Preventive and Community Dentistry |
| Jiang HW.                                                                                            | Theory and practice of minimally invasive endodontics                                                                                                                                                | 2016 | Zhonghua Kou Qiang Yi Xue Za Zhi                                       |
| Lu Y.; Liu Z.; Huang J.; Liu C.                                                                      | Therapeutic effect of one-time root canal treatment for irreversible pulpitis                                                                                                                        | 2019 | Journal of International Medical Research                              |
| Kley P, Frentzen M, Küpper K, Braun A, Kecsmar S, Jäger A, Wolf M.                                   | Thermotransduction and heat stress in dental structures during orthodontic debonding : Effectiveness of various cooling strategies                                                                   | 2016 | J Orofac Orthop                                                        |
| Duncan HF, Bjørndal L, van der Sluis L, Rechenberg DK, Simon S, Cooper PR, Ricucci D, Galler K.      | Third European Society of Endodontology (ESE) research meeting: ACTA, Amsterdam, The Netherlands, 26th October 2018: Deep caries and the exposed pulp: current and emerging therapeutic perspectives | 2019 | Int Endod J                                                            |
| Chompu-inwai P, Boonsongsawat K, Sastraruji T, Sophasri T, Mankaen S, Nondon S, Tunlek S, Katwong S. | Three Incomplete Caries Removal Techniques Compared Over Two Years in Primary Molars with Asymptomatic Deep Caries or Reversible Pulpitis                                                            | 2015 | Pediatr Dent                                                           |
| Markvart M, Bjørndal L, Darvann TA, Larsen P, Dalstra M, Kreiborg S.                                 | Three-dimensional analysis of the pulp cavity on surface models of molar teeth, using X-ray micro-computed tomography                                                                                | 2012 | Acta Odontol Scand                                                     |
| Diéguez-Pérez M, Ticona-Flores JM.                                                                   | Three-Dimensional Analysis of the Pulp Chamber and Coronal Tooth of Primary Molars: An In Vitro Study                                                                                                | 2022 | Int J Environ Res Public Health                                        |
| Hofmann E, Schmid M, Steinhäuser-Andresen S, Hirschfelder U.                                         | Three-dimensional CT evaluation of oculoauriculovertebral spectrum patients use of Katsumata's asymmetry index                                                                                       | 2016 | J Orofac Orthop                                                        |
| Widbiller M.; Lindner S.R.; Buchalla W.; Eidt A.; Hiller K.-A.; Schmalz G.; Galler K.M.              | Three-dimensional culture of dental pulp stem cells in direct contact to tricalcium silicate cements                                                                                                 | 2016 | Clinical Oral Investigations                                           |
| Sun W, Chen H, Zhong Y, Zhang W, Chu F, Li L, Chen Y, Wang X, Wang Q, Wang Y, Wei Y, Liu L, Xu Y.    | Three-Dimensional Tooth Models with Pulp Cavity Enhance Dental Anatomy Education                                                                                                                     | 2022 | Anat Sci Educ                                                          |
| Kuharattanachai K, Jotikasthira D, Sirabanchongkran S, Srisuwan T, Rangsi W, Tripuwabhrut K.         | Three-dimensional volumetric evaluation of dental pulp cavity/tooth ratio in anterior open bite malocclusion using cone beam computed tomography                                                     | 2022 | Clin Oral Investig                                                     |
| Raedel M., Hartmann A., Böhm S., Walter M.H.                                                         | Three-year outcomes of root canal treatment: Mining an insurance database                                                                                                                            | 2015 | Journal of dentistry                                                   |

|                                                                                                                                                                                     |                                                                                                                                                                                                                                  |      |                                                                  |
|-------------------------------------------------------------------------------------------------------------------------------------------------------------------------------------|----------------------------------------------------------------------------------------------------------------------------------------------------------------------------------------------------------------------------------|------|------------------------------------------------------------------|
| Kwon SR, Dawson DV, Wertz PW.                                                                                                                                                       | Time Course of Potassium Nitrate Penetration into the Pulp Cavity and the Effect of Penetration Levels on Tooth Whitening Efficacy                                                                                               | 2016 | J Esthet Restor Dent                                             |
| Chinajitphan N.; Ajcharanukul O.; Kijssamanmith K.; Vongsavan N.; Matthews B.                                                                                                       | Time-course of the effect of potassium oxalate in the treatment of hypersensitive dentine in man                                                                                                                                 | 2021 | Archives of Oral Biology                                         |
| Liu M.; Mu H.; Peng W.; Zhao L.; Hu W.; Jiang Z.; Gao L.; Cao X.; Li N.; Han J.                                                                                                     | Time-dependent C5a and C5aR expression in dental pulp cells following stimulation with LTA and LPS                                                                                                                               | 2019 | International Journal of Molecular Medicine                      |
| Nam O.H.; Kim J.-H.; Choi S.C.; Kim Y.                                                                                                                                              | Time-dependent response of human deciduous tooth-derived dental pulp cells treated with theraCal LC: Functional analysis of gene interactions compared to MTA                                                                    | 2020 | Journal of Clinical Medicine                                     |
| Santanna J.P.C.; Faria R.R.; Assad I.P.; Pinheiro C.C.G.; Aiello V.D.; Albuquerque-Neto C.; Bortolussi R.; Cestari I.A.; Maizato M.J.S.; Hernandez A.J.; Bueno D.F.; Fernandes T.L. | Tissue Engineering and Cell Therapy for Cartilage Repair: Preclinical Evaluation Methods                                                                                                                                         | 2022 | Tissue Engineering - Part C: Methods                             |
| Ahmed G.M.; Abouauf E.A.; Abubakr N.; Dörfer C.E.; El-Sayed K.F.                                                                                                                    | Tissue Engineering Approaches for Enamel, Dentin, and Pulp Regeneration: An Update                                                                                                                                               | 2020 | Stem Cells International                                         |
| Singh R.; Singh R.; Kavita K.; Kommula A.; Kulkarni G.; Jois H.S.                                                                                                                   | To compare mineral trioxide aggregate, platelet-rich fibrin, and calcium hydroxide in teeth with irreversible pulpitis: A clinical study                                                                                         | 2020 | Journal of Pharmacy and Bioallied Sciences                       |
| Sahito A.H.; Kuhuawar S.R.; Jokhio A.L.; Tagar M.R.; Shaikh M.A.; Kalwar M.R.                                                                                                       | To Determine Clinical Outcome of Platelet Rich Fibrin in Pulpotomy of Permanent Teeth in Irreversible Pulpitis                                                                                                                   | 2022 | Journal of the Liaquat University of Medical and Health Sciences |
| Plessas A.                                                                                                                                                                          | To what extent do patients' racial characteristics affect our clinical decisions?                                                                                                                                                | 2019 | Evid Based Dent                                                  |
| Lin J.-J.; Du Y.; Cai W.-K.; Kuang R.; Chang T.; Zhang Z.; Yang Y.-X.; Sun C.; Li Z.-Y.; Kuang F.                                                                                   | Toll-like receptor 4 signaling in neurons of trigeminal ganglion contributes to nociception induced by acute pulpitis in rats                                                                                                    | 2015 | Scientific Reports                                               |
| Ohara K.; Shimizu K.; Matsuura S.; Ogiso B.; Omagari D.; Asano M.; Tsuboi Y.; Shinoda M.; Iwata K.                                                                                  | Toll-like receptor 4 signaling in trigeminal ganglion neurons contributes tongue-referred pain associated with tooth pulp inflammation                                                                                           | 2013 | Journal of Neuroinflammation                                     |
| Nagpal A.; Kremer K.L.; Hamilton-Bruce M.A.; Kaidonis X.; Milton A.G.; Levi C.; Shi S.; Carey L.; Hillier S.; Rose M.; Zacest A.; Takhar P.; Koblar S.A.                            | TOOTH (The Open study Of dental pulp stem cell Therapy in Humans): Study protocol for evaluating safety and feasibility of autologous human adult dental pulp stem cell therapy in patients with chronic disability after stroke | 2016 | International Journal of Stroke                                  |
| Albuquerque M.T.P., Abreu L.C., Martim L., Münchow E.A., Nagata J.Y.                                                                                                                | Tooth- and Patient-Related Conditions May Influence Root Canal Treatment Indication                                                                                                                                              | 2021 | International Journal of Dentistry                               |
| Ali A.A.B., Qooz F.A., Mustafa O.S.                                                                                                                                                 | Tooth avulsion: Etiology and management                                                                                                                                                                                          | 2020 | Bahrain Medical Bulletin                                         |
| Jain S, Nagi R, Daga M, Shandilya A, Shukla A, Parakh A, Laheji A, Singh R.                                                                                                         | Tooth coronal index and pulp/tooth ratio in dental age estimation on digital panoramic radiographs-A comparative study                                                                                                           | 2017 | Forensic Sci Int                                                 |
| Griffis E., Abd Alraheem I., Boushell L., Donovan T., Fasbinder D., Sulaiman T.A.                                                                                                   | Tooth-cusp preservation with lithium disilicate onlay restorations: A fatigue resistance study                                                                                                                                   | 2022 | Journal of Esthetic and Restorative Dentistry                    |
| Baccouche C, Ghoul-Mazgar S, Baaziz A, Said F, Ben Salem K.                                                                                                                         | Topography of the pulp chamber in the maxillary primary molars of a Tunisian children                                                                                                                                            | 2013 | Indian J Dent Res                                                |
| Emrick J.J.; von Buchholtz L.J.; Ryba N.J.P.                                                                                                                                        | Transcriptomic Classification of Neurons Innervating Teeth                                                                                                                                                                       | 2020 | Journal of Dental Research                                       |
| Limone LE, Baratt RM.                                                                                                                                                               | Transcutaneous Lateral Alveolar Osteotomy for Standing Surgical Extraction of Mandibular First Molar in an 8-Year-Old Miniature Horse                                                                                            | 2020 | J Vet Dent                                                       |
| Bakri M.M.; Yahya F.; Munawar K.M.M.; Kitagawa J.; Hossain M.Z.                                                                                                                     | Transient receptor potential vanilloid 4 (TRPV4) expression on the nerve fibers of human dental pulp is upregulated under inflammatory condition                                                                                 | 2018 | Archives of Oral Biology                                         |
| Peters O.A.                                                                                                                                                                         | Translational opportunities in stem cell-based endodontic therapy: Where are we and what are we missing?                                                                                                                         | 2014 | Journal of Endodontics                                           |
| Diogenes A.R.; Ruparel N.B.; Teixeira F.B.; Hargreaves K.M.                                                                                                                         | Translational science in disinfection for regenerative endodontics                                                                                                                                                               | 2014 | Journal of Endodontics                                           |
| Sasaki R, Takanashi N, Chigono T.                                                                                                                                                   | Transplantation of a tooth involved in dentigerous cyst                                                                                                                                                                          | 2012 | Eur J Paediatr Dent                                              |
| Nito C.; Sowa K.; Nakajima M.; Sakamoto Y.; Suda S.; Nishiyama Y.; Nakamura-Takahashi A.; Nitahara-                                                                                 | Transplantation of human dental pulp stem cells ameliorates brain damage following acute cerebral ischemia                                                                                                                       | 2018 | Biomedicine and Pharmacotherapy                                  |

|                                                                                                                                                       |                                                                                                                                                                |      |                                                                   |
|-------------------------------------------------------------------------------------------------------------------------------------------------------|----------------------------------------------------------------------------------------------------------------------------------------------------------------|------|-------------------------------------------------------------------|
| Kasahara Y.; Ueda M.; Okada T.; Kimura K.                                                                                                             |                                                                                                                                                                |      |                                                                   |
| Feitosa M.L.T.; Sarmiento C.A.P.; Bocabello R.Z.; Beltrão-Braga P.C.B.; Pignatari G.C.; Giglio R.F.; Miglino M.A.; Orlandin J.R.; Ambrósio C.E.       | Transplantation of human immature dental pulp stem cell in dogs with chronic spinal cord injury                                                                | 2017 | Acta Cirurgica Brasileira                                         |
| Kaptan R.F.; Haznedaroglu F.; Basturk F.B.; Kayahan M.B.                                                                                              | Treatment approaches and antibiotic use for emergency dental treatment in Turkey                                                                               | 2013 | Therapeutics and Clinical Risk Management                         |
| Radwan A.; Kim S.G.                                                                                                                                   | Treatment of a hypertaurodontic maxillary second molar in a patient with 10 taurodonts: A case report                                                          | 2014 | Journal of Endodontics                                            |
| Saoud T.M.A.; Sigurdsson A.; Rosenberg P.A.; Lin L.M.; Ricucci D.                                                                                     | Treatment of a large cystlike inflammatory periapical lesion associated with mature necrotic teeth using regenerative endodontic therapy                       | 2014 | Journal of Endodontics                                            |
| de Albuquerque M.S.; Rizuto A.V.; de Araújo Silva Tavares Á.F.; Nascimento A.S.; de Souza Araújo P.R.; de Lima E.A.; Braz da Silva R.                 | Treatment of an Acute Apical Abscess in a Patient With Autoimmune Hepatitis Taking Alendronate: A Case Report                                                  | 2019 | Journal of Endodontics                                            |
| Arias Z.; Cazas I.; Siddiqui Y.D.; Yamashiro K.; Takashiba S.; Alam M.K.                                                                              | Treatment of bucco-accessory root canal of a maxillary incisor with a combination of cone beam computed tomography and continuous supersonic wave condensation | 2019 | International Medical Journal                                     |
| Kiefner P.; Connert T.; ElAyouti A.; Weiger R.                                                                                                        | Treatment of calcified root canals in elderly people: a clinical study about the accessibility, the time needed and the outcome with a three-year follow-up    | 2017 | Gerodontology                                                     |
| Ghezzi C.; Virzi M.; Schupbach P.; Broccaioli A.; Simion M.                                                                                           | Treatment of combined endodontic-periodontic lesions using guided tissue regeneration: Clinical case and histology                                             | 2012 | International Journal of Periodontics and Restorative Dentistry   |
| Kim J.C.; Park J.-C.; Kim S.-H.; Im G.-I.; Kim B.-S.; Lee J.-B.; Choi E.-Y.; Song J.-S.; Cho K.-S.; Kim C.-S.                                         | Treatment of FGF-2 on stem cells from inflamed dental pulp tissue from human deciduous teeth                                                                   | 2014 | Oral Diseases                                                     |
| Saoud T.M.; Martin G.; Chen Y.-H.M.; Chen K.-L.; Chen C.-A.; Songtrakul K.; Malek M.; Sigurdsson A.; Lin L.M.                                         | Treatment of Mature Permanent Teeth with Necrotic Pulp and Apical Periodontitis Using Regenerative Endodontic Procedures: A Case Series                        | 2016 | Journal of Endodontics                                            |
| Amoah G.; Moola S.; Newman-Nartey M.                                                                                                                  | Treatment of primary teeth using formocresol pulpotomy for patients attending a University Dental School Clinic: Best practice implementation project          | 2014 | JBIR Database of Systematic Reviews and Implementation Reports    |
| Bergenholtz G.; Axelsson S.; Davidson T.; Frisk F.; Hakeberg M.; Kvist T.; Norlund A.; Petersson A.; Portenier I.; Sandberg H.; Tranæus S.; Mejare I. | Treatment of pulps in teeth affected by deep caries - A systematic review of the literature                                                                    | 2013 | Singapore Dent J                                                  |
| Ahmed T.; Kaushal N.                                                                                                                                  | Treatment of Radicular Cyst with Marsupialization in Children: Report of Two Rare Cases                                                                        | 2022 | International Journal of Clinical Pediatric Dentistry             |
| Altner S.; Ebel M.; Ritschl V.; Stamm T.; Hirsch C.; Bekes K.                                                                                         | Treatment of Severe Caries and Molar Incisor Hypomineralization and Its Influence on Oral Health-Related Quality of Life in Children: A Comparative Study      | 2022 | International Journal of Environmental Research and Public Health |
| Dogan S.; Ozturk G.; Gumus H.                                                                                                                         | Treatment of severely decayed anterior primary teeth with short-post technique (Mushroom Restorations) under general anesthesia                                | 2020 | Nigerian journal of clinical practice                             |
| Al-Omiri M.K.; Alqahtani N.M.; Alahmari N.M.; Hassan R.A.; Al Nazeh A.A.; Lynch E.                                                                    | Treatment of symptomatic, deep, almost cariously exposed lesions using ozone                                                                                   | 2021 | Scientific reports                                                |
| Linu S.; Lekshmi M.S.; Varunkumar V.S.; Sam Joseph V.G.                                                                                               | Treatment Outcome Following Direct Pulp Capping Using Bioceramic Materials in Mature Permanent Teeth with Carious Exposure: A Pilot Retrospective Study        | 2017 | Journal of endodontics                                            |
| Makanjuola JO, Umesi DC, Oderinu OH.                                                                                                                  | TREATMENT OUTCOME OF MANUAL VERSUS ROTARY TECHNIQUES IN SINGLE-VISIT ENDODONTICS FOR PATIENTS IN A NIGERIAN TEACHING HOSPITAL: A RANDOMIZED CLINICAL TRIAL     | 2018 | J West Afr Coll Surg                                              |
| Linsuwanont P, Wimsutthikul K, Pothimoke U, Santiwong B.                                                                                              | Treatment Outcomes of Mineral Trioxide Aggregate Pulpotomy in Vital Permanent Teeth with Carious Pulp Exposure: The Retrospective Study                        | 2017 | J Endod                                                           |
| Re D., Cerutti F., Consonni D., Gorni F.G.                                                                                                            | Treatment planning of damaged teeth: to recover or to extract?                                                                                                 | 2017 | Minerva stomatologica                                             |
| Chai B, Tay B, Chow C, Fuss J, Krishnan U.                                                                                                            | Treatment preferences for deep caries lesions among Australian dentists                                                                                        | 2020 | Aust Dent J                                                       |

|                                                                                                         |                                                                                                                                                              |      |                                              |
|---------------------------------------------------------------------------------------------------------|--------------------------------------------------------------------------------------------------------------------------------------------------------------|------|----------------------------------------------|
| Stangvaltaite L.; Kundzina R.; Eriksen H.M.; Kerosuo E.                                                 | Treatment preferences of deep carious lesions in mature teeth: Questionnaire study among dentists in Northern Norway                                         | 2013 | Acta Odontologica Scandinavica               |
| Yoo B.J., Jung S.M., Lee H.N., Kim H.G., Chung J.H., Jeong J.H.                                         | Treatment Strategy for Odontogenic Sinusitis                                                                                                                 | 2021 | American Journal of Rhinology and Allergy    |
| Wong A.W.; Zhu X.; Zhang S.; Li S.K.; Zhang C.; Chu C.-H.                                               | Treatment time for non-surgical endodontic therapy with or without a magnifying loupe                                                                        | 2015 | BMC Oral Health                              |
| Liu F, Yang K, Wang P, Wu T, Li J, Guo Q.                                                               | Trends, Characteristics, and Success Rates of Treatment for Severe Early Childhood Caries Under General Anesthesia: A Retrospective Study in Northwest China | 2021 | J Clin Pediatr Dent                          |
| Huang S.-M.; Huang J.-Y.; Yu H.-C.; Su N.-Y.; Chang Y.-C.                                               | Trends, demographics, and conditions of emergency dental visits in Taiwan 1997–2013: A nationwide population-based retrospective study                       | 2019 | Journal of the Formosan Medical Association  |
| Santamaria R, Innes N.                                                                                  | Trial shows partial caries removal is an effective technique in primary molars                                                                               | 2014 | Evid Based Dent                              |
| Huang J.I.-S.; Chang H.-H.; Lin C.-P.; Liao W.-C.; Kao C.-T.; Huang T.-H.                               | Trigemino-cardiac reflex during non-surgical root canal treatment of teeth with irreversible pulpitis                                                        | 2018 | Journal of the Formosan Medical Association  |
| Derchi G.; Marchio V.; Borgia V.; Özcan M.; Giuca M.R.; Barone A.                                       | Twelve-year longitudinal clinical evaluation of bonded indirect composite resin inlays                                                                       | 2019 | Quintessence International                   |
| Hosoya A, Yukita A, Yoshiba K, Yoshiba N, Takahashi M, Nakamura H.                                      | Two distinct processes of bone-like tissue formation by dental pulp cells after tooth transplantation                                                        | 2012 | J Histochem Cytochem                         |
| Shakouie S, Mokhtari H, Ghasemi N, Gholizadeh S.                                                        | Two-rooted maxillary first molars with two canals: a case series                                                                                             | 2013 | Iran Endod J                                 |
| You WZ, Dou GL, Xia B.                                                                                  | Two-year outcomes and the influence factors of indirect pulp treatment in primary teeth: a retrospective study                                               | 2019 | Beijing Da Xue Xue Bao Yi Xue Ban            |
| Khorakian F, Mazhari F, Asgary S, Sahebnasagh M, Alizadeh Kaseb A, Movahhed T, Sarraf Shirazi AR.       | Two-year outcomes of electrosurgery and calcium-enriched mixture pulpotomy in primary teeth: a randomised clinical trial                                     | 2014 | Eur Arch Paediatr Dent                       |
| Haripriya S.                                                                                            | Type of caries excavation performed during pulp capping procedures in adult population – institutional-based study                                           | 2020 | International Journal of Clinical Dentistry  |
| Nazemismalman B.; Farsadeghi M.; Sokhansanj M.                                                          | Types of lasers and their applications in pediatric dentistry                                                                                                | 2015 | Journal of Lasers in Medical Sciences        |
| El-Bialy T.; Alhadlaq A.; Wong B.; Kucharski C.                                                         | Ultrasound effect on neural differentiation of gingival stem/progenitor cells                                                                                | 2014 | Annals of Biomedical Engineering             |
| Patel N, Patel S, Cotti E, Bardini G, Mannocci F.                                                       | Unconscious Racial Bias May Affect Dentists' Clinical Decisions on Tooth Restorability: A Randomized Clinical Trial                                          | 2019 | JDR Clin Trans Res                           |
| Aziz K.; Hoover T.; Sidhu G.                                                                            | Understanding root resorption with diagnostic imaging.                                                                                                       | 2014 | Journal of the California Dental Association |
| Hallak B., Teiga P., Bühler J.-P., Bouayed S.                                                           | Unexpected foreign body induced refractory maxillary sinusitis                                                                                               | 2021 | Clinical Case Reports                        |
| Gondak R.O.; Rocha A.C.; Neves Campos J.G.; Vargas P.A.; De Almeida O.P.; Lopes M.A.; Santos-Silva A.R. | Unicystic ameloblastoma mimicking apical periodontitis: A case series                                                                                        | 2013 | Journal of Endodontics                       |
| Marchan S.M., Coppin E., Balkaran R.                                                                    | Unmet Dental Treatment Needs and Barriers to Dental Care of Patients with Special Needs Attending a Dental Teaching Hospital                                 | 2022 | Portuguese Journal of Public Health          |
| Al-Amery SM, Nambiar P, John J, Purmal K, Ngeow WC, Mohamed NH, Vellayan S.                             | Unusual Dental Morphology in a Chimpanzee: A Case Report Utilizing Cone-Beam Computed Tomography                                                             | 2018 | J Vet Dent                                   |
| Ashqar N.M., Ali F.M.                                                                                   | Unusual foreign object in a tooth: A case report and review of literature                                                                                    | 2019 | Clinics and Practice                         |
| Ricucci D.; Milovidova I.; Siqueira J.F., Jr.                                                           | Unusual Location of Dens Invaginatus Causing a Difficult-to-Diagnose Pulpal Involvement                                                                      | 2020 | Journal of Endodontics                       |
| Nie S.-C.; Yang K.; Luan N.-N.; Lian X.-L.; Dai X.-H.; Liang S.-X.; Yan Y.-B.                           | Unveiling the Differences in Biological Properties of Dental Pulp Stem Cells from Normal and Inflamed Pulp: A Comprehensive Comparative Study                | 2022 | Medical Science Monitor                      |
| Short R.                                                                                                | Update on apexogenesis: case reports: achieving predictable root maturation in young patients                                                                | 2013 | Dent Today                                   |
| Kaneko T, Chokechanachaisakul U, Kawamura J, Yamanaka Y, Ito T, Sunakawa M, Suda H, Okiji T.            | Up-regulation of p38 mitogen-activated protein kinase during pulp injury-induced glial cell/neuronal interaction in the rat thalamus                         | 2013 | J Endod                                      |
| Shang Y.; Li Y.; Yang Z.; Zhou Z.                                                                       | Upregulation of TACAN in the trigeminal ganglion affects pain transduction in acute pulpitis                                                                 | 2022 | Archives of Oral Biology                     |

|                                                                                                       |                                                                                                                                                                            |      |                                           |
|-------------------------------------------------------------------------------------------------------|----------------------------------------------------------------------------------------------------------------------------------------------------------------------------|------|-------------------------------------------|
| Mahmoudi J.; Sabermarouf B.; Baradaran B.; Sadat-Hatamnezhad L.; Shotorbani S.S.                      | Up-regulation of TLR2 and TLR4 in high mobility group Box1-stimulated macrophages in pulpitis patients                                                                     | 2017 | Iranian Journal of Basic Medical Sciences |
| Lee P.R.; Lee J.-H.; Park J.M.; Oh S.B.                                                               | Upregulation of toll-like receptor 2 in dental primary afferents following pulp injury                                                                                     | 2021 | Experimental Neurobiology                 |
| Gok E, Fedakar R, Kafa IM.                                                                            | Usability of dental pulp visibility and tooth coronal index in digital panoramic radiography in age estimation in the forensic medicine                                    | 2020 | Int J Legal Med                           |
| Lamé G.; Yannou B.; Cluzel F.                                                                         | Usage-driven problem design for radical innovation in healthcare                                                                                                           | 2018 | BMJ Innovations                           |
| Sim R.R.; Stringer E.; Donovan D.; Chappell R.; Flora P.; Hall J.; Pillay S.; Willis B.G.; McCain S.  | USE of COMPOSITE MATERIALS AS A COMPONENT of TUSK FRACTURE MANAGEMENT in AN ASIAN ELEPHANT (ELEPHAS MAXIMUS) and AN AFRICAN ELEPHANT (LOXODONTA AFRICANA)                  | 2017 | Journal of Zoo and Wildlife Medicine      |
| Gulsahi A.; Ates U.; Tirali R.E.; Cehreli S.B.                                                        | Use of cone-beam computed tomography in diagnosis of an otherwise undetected periapical lesion in an anomalous tooth                                                       | 2014 | Oral Radiology                            |
| de Oliveira E.E.G.; Pinheiro T.P.; Miyahara L.A.N.; Maneschy A.G.F.; Pontes H.A.R.; Khayat A.I.       | Use of endodontic guide for resolution of calcified root canals: case report                                                                                               | 2019 | Dental Press Endodontics                  |
| Coll J.A.; Dhar V.; Vargas K.; Chen C.-Y.; Crystal Y.O.; AlShamali S.; Marghalani A.A.                | Use of Non-Vital Pulp Therapies in Primary Teeth                                                                                                                           | 2020 | Pediatric dentistry                       |
| Kovach I.V.; Dychko E.N.; Kopchak O.V.; Buniatian Kh.A.; Khotimska Yu.V.; Gargin V.V.; Lavreniuk Y.V. | Use of odontotropic material in treatment of traumatic pulpitis in experiment.; Застосування одонтотропного матеріалу при лікуванні травматичного пульпіту в експерименті. | 2021 | Medicni Perspektivi                       |
| Biezanek T.; Strycharz-Dudziak M.; Bachanek T.                                                        | Use of ozone in endodontic treatment - Clinical observations; Zastosowanie ozonu w leczeniu endodontycznym - Obserwacje kliniczne                                          | 2012 | Dental and Medical Problems               |
| Paterson A, Franco V, Patel S, Foschi F.                                                              | Use of preoperative cone-beam computed tomography to aid in establishment of endodontic working length: A systematic review and meta-analysis                              | 2020 | Imaging Sci Dent                          |
| Luz Segundo A.C.S.; Silva R.V.; Pereira R.P.; Nunes E.                                                | Use of reciproc in mandibular premolar with double-curved root canals: A case report                                                                                       | 2015 | Dental Press Endodontics                  |
| Silva R.V.; Santos F.L.A.A.; Ravazzi T.P.Q.; Rodrigues C.T.; Pereira R.P.                             | Use of the Reciproc Blue instrument associated with photodynamic therapy: case report                                                                                      | 2021 | Dental Press Endodontics                  |
| Nawaya FR, Burhan AS.                                                                                 | Use of the Tooth Coronal Pulp Index for Recognition of the Pubertal Growth Period                                                                                          | 2016 | J Contemp Dent Pract                      |
| Dhar V, Marghalani AA, Crystal YO, Kumar A, Ritwik P, Tulunoglu O, Graham L.                          | Use of Vital Pulp Therapies in Primary Teeth with Deep Caries Lesions                                                                                                      | 2017 | Pediatr Dent                              |
| Mathieu S.; Jeanneau C.; Sheibat-Othman N.; Kalaji N.; Fessi H.; About I.                             | Usefulness of controlled release of growth factors in investigating the early events of dentin-pulp regeneration                                                           | 2013 | Journal of Endodontics                    |
| Rashkova M.; Mltova N.; Lazarova Z.; Gateva N.                                                        | Using a dental operating microscope in the treatment of reversible pulpitis in primary teeth                                                                               | 2020 | Cumhuriyet Dental Journal                 |
| Gurudutt Nayak B.; Singh I.                                                                           | Using spiral computed tomography for endodontic management of a mandibular first molar with a middle mesial canal: A case report                                           | 2013 | General Dentistry                         |
| Da Silva K, Kunzel C, Yoon RK.                                                                        | Utilization of emergency services for non-traumatic dental disease                                                                                                         | 2013 | J Clin Pediatr Dent                       |
| Kumar V.; Price J.B.; Brooks J.K.                                                                     | Value of Performing Routine Vascular Mapping Synchronous with Radiographic Assessment of Endodontic Lesions: Case Series                                                   | 2021 | Journal of Endodontics                    |
| Kim G., Lee J.                                                                                        | Variability of dental abnormalities according to the timing of anticancer therapy: A report of two cases                                                                   | 2022 | Pediatric Dental Journal                  |
| Rønneberg A, Skaare AB, Hofmann B, Espelid I.                                                         | Variation in caries treatment proposals among dentists in Norway: the best interest of the child                                                                           | 2017 | Eur Arch Paediatr Dent                    |
| Usha G, Muddappa SC, Venkitachalam R, Singh V P P, Rajan RR, Ravi AB.                                 | Variations in root canal morphology of permanent incisors and canines among Asian population: A systematic review and meta-analysis                                        | 2021 | J Oral Biosci                             |
| Al-Hassiny A.; Hussaini H.; Milne T.; Seo B.; Rich A.M.; Friedlander L.T.                             | Vascularity and angiogenic signaling in the dentine-pulp complex of immature and mature permanent teeth                                                                    | 2019 | European Endodontic Journal               |



|                                                                                                                                                                       |                                                                                                                                                                             |      |                                                        |
|-----------------------------------------------------------------------------------------------------------------------------------------------------------------------|-----------------------------------------------------------------------------------------------------------------------------------------------------------------------------|------|--------------------------------------------------------|
| Liang Q.; Liang C.; Liu X.; Xing X.; Ma S.; Huang H.; Liang C.; Liu L.; Liao L.; Tian W.                                                                              | Vascularized dental pulp regeneration using cell-laden microfiber aggregates                                                                                                | 2022 | Journal of Materials Chemistry B                       |
| Yuan X.; Yuan Z.; Wang Y.; Wan Z.; Wang X.; Yu S.; Han J.; Huang J.; Xiong C.; Ge L.; Cai Q.; Zhao Y.                                                                 | Vascularized pulp regeneration via injecting simvastatin functionalized GelMA cryogel microspheres loaded with stem cells from human exfoliated deciduous teeth             | 2022 | Materials Today Bio                                    |
| Haueisen H.; Gärtner K.; Kaiser L.; Trohorsch D.; Heidemann D.                                                                                                        | Vertical root fracture: Prevalence, etiology, and diagnosis                                                                                                                 | 2013 | Quintessence International                             |
| Zhong S.; Naqvi A.; Bair E.; Nares S.; Khan A.A.                                                                                                                      | Viral MicroRNAs Identified in Human Dental Pulp                                                                                                                             | 2017 | Journal of Endodontics                                 |
| Zafar S.; Lai Y.; Sexton C.; Siddiqi A.                                                                                                                               | Virtual Reality as a novel educational tool in pre-clinical paediatric dentistry training: Students' perceptions                                                            | 2020 | International Journal of Paediatric Dentistry          |
| Hernández Vigueras S.; Donoso Zúñiga M.; Jané-Salas E.; Salazar Navarrete L.; Segura-Egea J.J.; Velasco-Ortega E.; López-López J.                                     | Viruses in pulp and periapical inflammation: a review                                                                                                                       | 2016 | Odontology                                             |
| Szopinski KT, Regulski P.                                                                                                                                             | Visibility of dental pulp spaces in dental ultrasound                                                                                                                       | 2014 | Dentomaxillofac Radiol                                 |
| Chisini L.A.; Conde M.C.M.; Correa M.B.; Dantas R.V.F.; Silva A.F.; Pappen F.G.; Demarco F.F.                                                                         | Vital pulp therapies in clinical practice: Findings from a survey with dentist in southern Brazil                                                                           | 2015 | Brazilian Dental Journal                               |
| Hanna SN, Perez Alfayate R, Prichard J.                                                                                                                               | Vital Pulp Therapy an Insight Over the Available Literature and Future Expectations                                                                                         | 2020 | Eur Endod J                                            |
| Asgary S.; Nourzadeh M.; Verma P.; Hicks M.L.; Nosrat A.                                                                                                              | Vital Pulp Therapy as a Conservative Approach for Management of Invasive Cervical Root Resorption: A Case Series                                                            | 2019 | Journal of Endodontics                                 |
| Vafaei A, Nikookhesal M, Erfanparast L, Løvschall H, Ranjkesh B.                                                                                                      | Vital pulp therapy following pulpotomy in immature first permanent molars with deep caries using novel fast-setting calcium silicate cement: A retrospective clinical study | 2022 | J Dent                                                 |
| Leong D.J.X., Yap A.U.                                                                                                                                                | Vital pulp therapy in carious pulp-exposed permanent teeth: an umbrella review                                                                                              | 2021 | Clinical oral investigations                           |
| Luotonen N.; Kuntsi-Vaattovaara H.; Sarkiala-Kessel E.; Junnila J.J.T.; Laitinen-Vapaavuori O.; Verstraete F.J.M.                                                     | Vital pulp therapy in dogs: 190 cases (2001-2011)                                                                                                                           | 2014 | Journal of the American Veterinary Medical Association |
| Gizani S, Seremidi K, Stratigaki E, Tong HJ, Duggal M, Kloukos D.                                                                                                     | Vital Pulp Therapy in Primary Teeth with Deep Caries: An Umbrella Review                                                                                                    | 2021 | Pediatr Dent                                           |
| Kisby L.                                                                                                                                                              | Vital Pulp Therapy in Primary Teeth: An Update                                                                                                                              | 2016 | Dent Today                                             |
| Wang F.-M.; Charunmethee P.; Augsburg R.A.; Gutmann J.L.                                                                                                              | Vital pulp therapy of a dens evaginatus-affected tooth with an immature apex and inflamed pulpal and periapical tissue: A case report                                       | 2020 | General Dentistry                                      |
| Asgary S, Kemal Çalışkan M.                                                                                                                                           | Vital Pulp Therapy of a Mature Molar with Concurrent Hyperplastic Pulpitis, Internal Root Resorption and Periradicular Periodontitis: A Case Report                         | 2015 | Iran Endod J                                           |
| Iaculli F, Rodríguez-Lozano FJ, Briseño-Marroquín B, Wolf TG, Spagnuolo G, Rengo S.                                                                                   | Vital Pulp Therapy of Permanent Teeth with Reversible or Irreversible Pulpitis: An Overview of the Literature                                                               | 2022 | J Clin Med                                             |
| Ashraf H, Rahmati A, Amini N.                                                                                                                                         | Vital Pulp Therapy with Calcium-Silicate Cements: Report of Two Cases                                                                                                       | 2017 | Iran Endod J                                           |
| Strassler H.E.; Levin R.                                                                                                                                              | Vital pulp therapy with pulp capping.                                                                                                                                       | 2012 | Dentistry today                                        |
| Ricucci D, Siqueira JF Jr, Li Y, Tay FR.                                                                                                                              | Vital pulp therapy: histopathology and histobacteriology-based guidelines to treat teeth with deep caries and pulp exposure                                                 | 2019 | J Dent                                                 |
| Matoug-Elwerfelli M, ElSheshtawy AS, Duggal M, Tong HJ, Nazzal H.                                                                                                     | Vital pulp treatment for traumatized permanent teeth: A systematic review                                                                                                   | 2022 | Int Endod J                                            |
| Venkatesh S, Ajmera S, Ganeshkar SV.                                                                                                                                  | Volumetric pulp changes after orthodontic treatment determined by cone-beam computed tomography                                                                             | 2014 | J Endod                                                |
| Hamouda M, Deery C.                                                                                                                                                   | What is the best caries removal strategy for primary molars?                                                                                                                | 2021 | Evid Based Dent                                        |
| Hunter DJ, Bardet C, Mouraret S, Liu B, Singh G, Sadoine J, Dhamdhare G, Smith A, Tran XV, Joy A, Rooker S, Suzuki S, Vuorinen A, Miettinen S, Chaussain C, Helms JA. | Wnt Acts as a Prosurvival Signal to Enhance Dentin Regeneration                                                                                                             | 2015 | J Bone Miner Res                                       |
| Vijaykumar A.; Root S.H.; Mina M.                                                                                                                                     | Wnt/ $\beta$ -Catenin Signaling Promotes the Formation of Preodontoblasts In Vitro                                                                                          | 2021 | Journal of Dental Research                             |

|                                                                                             |                                                                                                                                                                      |      |                                                                   |
|---------------------------------------------------------------------------------------------|----------------------------------------------------------------------------------------------------------------------------------------------------------------------|------|-------------------------------------------------------------------|
| Zhao Y.; Wang C.-L.; Li R.-M.; Hui T.-Q.; Su Y.-Y.; Yuan Q.; Zhou X.-D.; Ye L.              | Wnt5a promotes inflammatory responses via nuclear factor $\kappa$ B (NF- $\kappa$ B) and mitogen-activated protein kinase (MAPK) pathways in human dental pulp cells | 2014 | Journal of Biological Chemistry                                   |
| Zhao Y, Yuan X, Liu B, Tulu US, Helms JA.                                                   | Wnt-Responsive Odontoblasts Secrete New Dentin after Superficial Tooth Injury                                                                                        | 2018 | J Dent Res                                                        |
| Smadi L., Sumadi A.A.                                                                       | Women's oral and dental health aspects in humanitarian missions and disasters: Jordanian experience                                                                  | 2016 | American journal of disaster medicine                             |
| Pandranki J.; Vanga N.R.V.; Chandrabhatla S.K.                                              | Zinc oxide eugenol and Endoflas pulpectomy in primary molars: 24-month clinical and radiographic evaluation                                                          | 2018 | Journal of Indian Society of Pedodontics and Preventive Dentistry |
| Gonzalez-Lara A, Ruiz-Rodriguez MS, Pierdant-Perez M, Garrocho-Rangel JA, Pozos-Guillen AJ. | Zinc Oxide-Eugenol Pulpotomy in Primary Teeth: A 24-Month Follow-up                                                                                                  | 2016 | J Clin Pediatr Dent                                               |
| Schaffner M., Stich H., Megert B., Lussi A.                                                 |                                                                                                                                                                      | 2016 | Swiss dental journal                                              |
